# Supplementary material for: Diversity and determinants of recombination landscapes in flowering plants
Source: PubMed Central journal article supplement (PMC9467342; doi:10.1371/journal.pgen.1010141), 2022-08-30

*Arabidopsis thaliana* chromosome 1

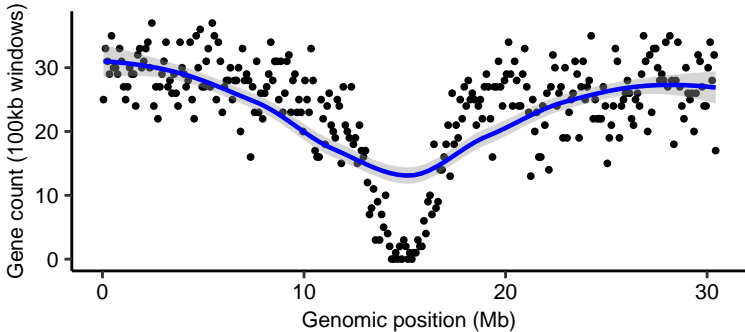

*Arabidopsis thaliana* chromosome 2

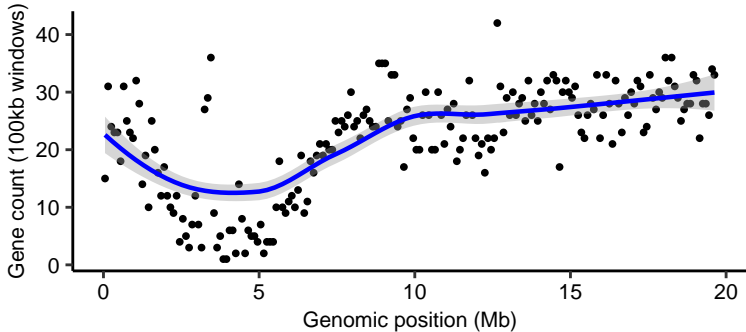

*Arabidopsis thaliana* chromosome 3

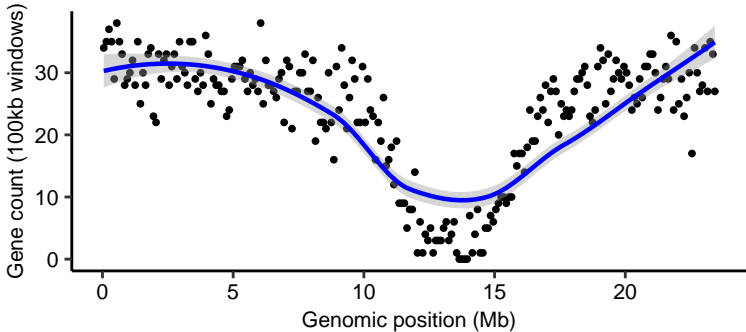

*Arabidopsis thaliana* chromosome 4

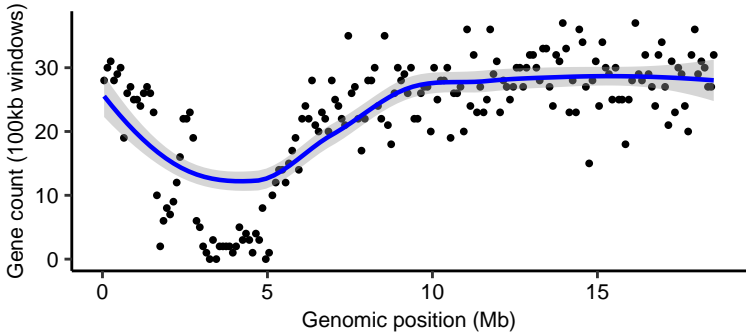

*Arabidopsis thaliana* chromosome 5

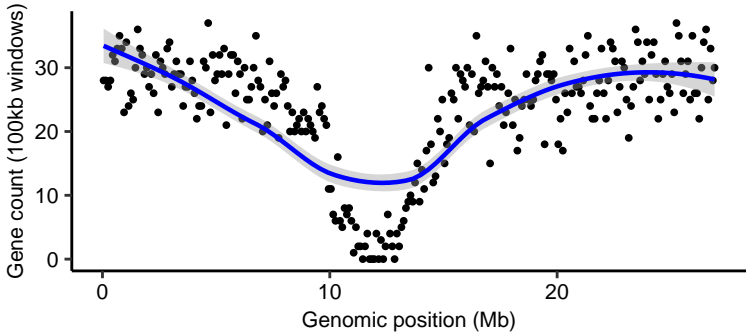

*Arachis duranensis* chromosome A1

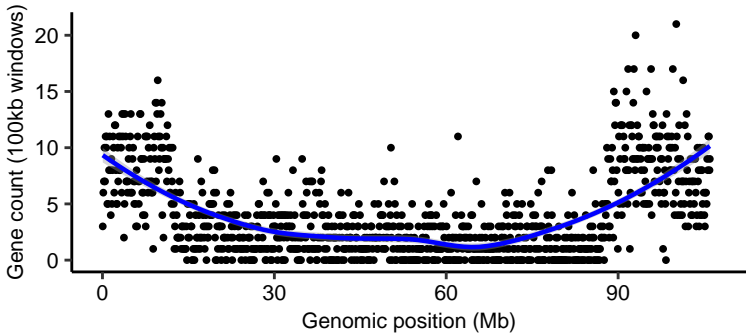

*Arachis duranensis* chromosome A10

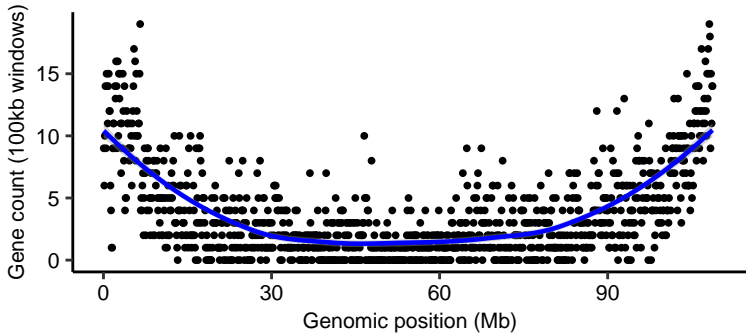

*Arachis duranensis* chromosome A2

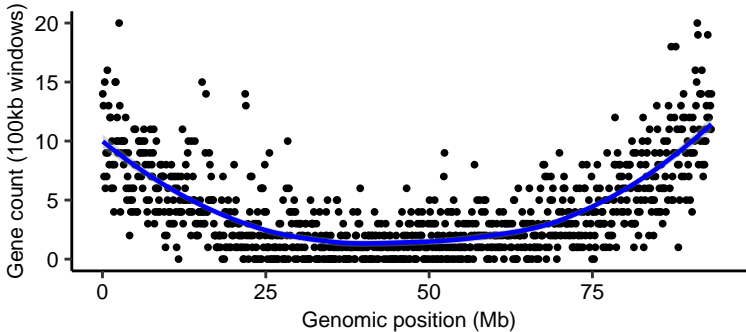



### *Arachis duranensis* chromosome A3

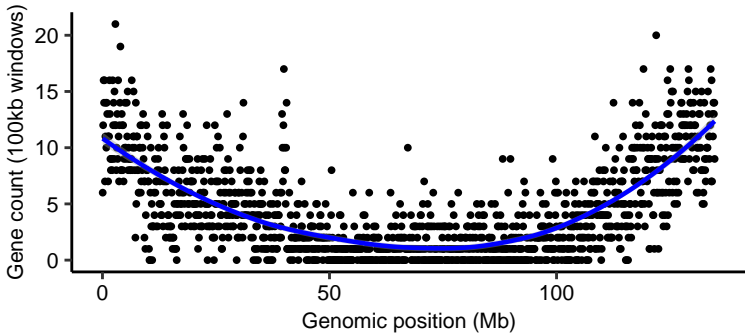

*Arachis duranensis* chromosome A4

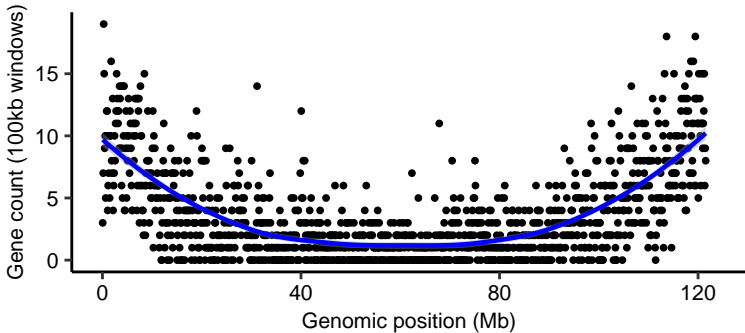

*Arachis duranensis* chromosome A5

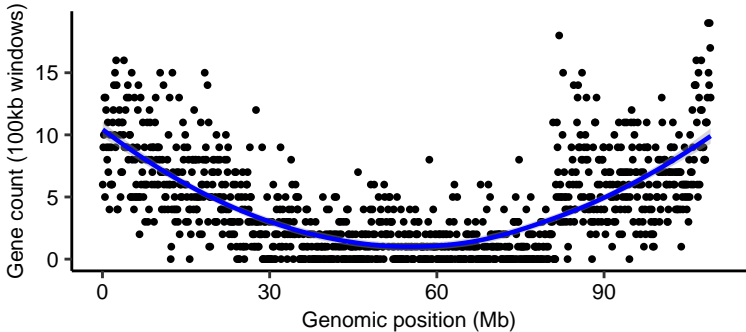

*Arachis duranensis* chromosome A7

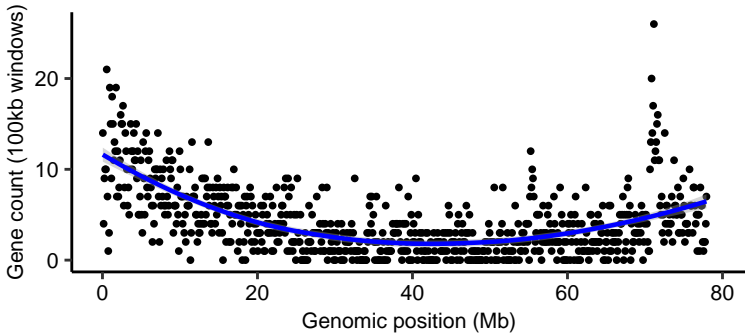

*Arachis duranensis* chromosome A8

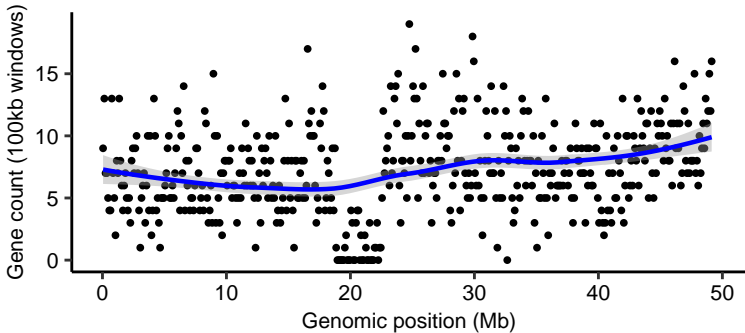

*Arachis hypogaea* chromosome A10

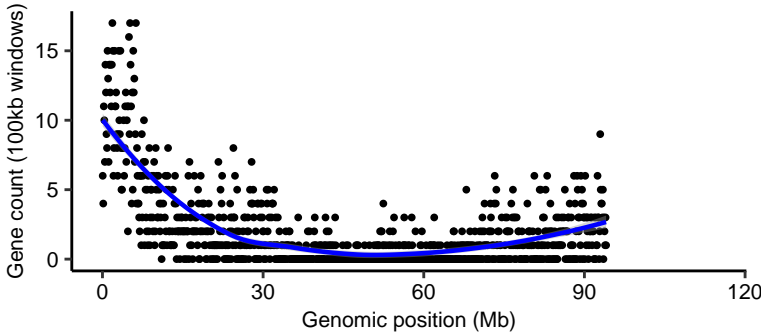

*Arachis hypogaea* chromosome B10

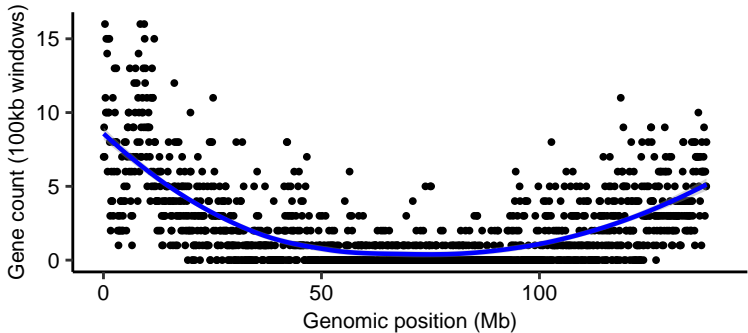

*Brachypodium distachyon* chromosome 3

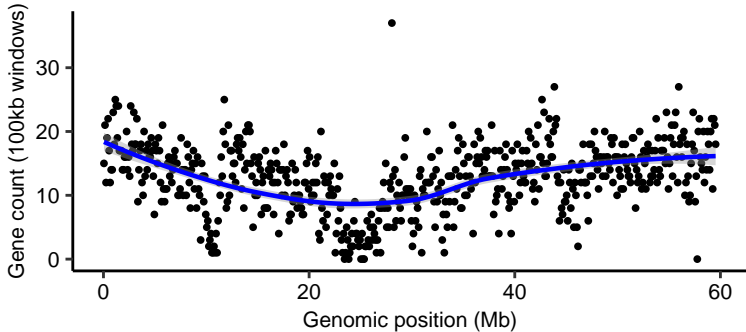



*Brachypodium distachyon* chromosome 4

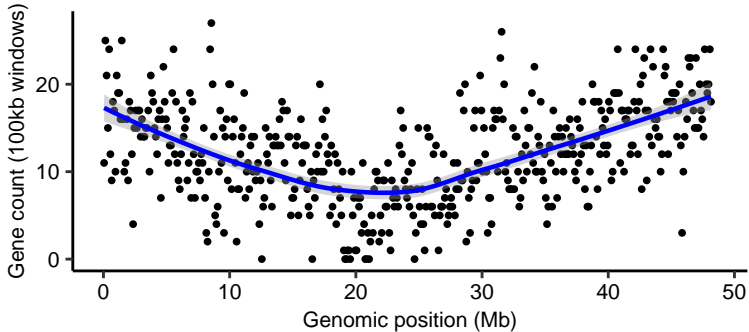

*Brachypodium distachyon* chromosome 5

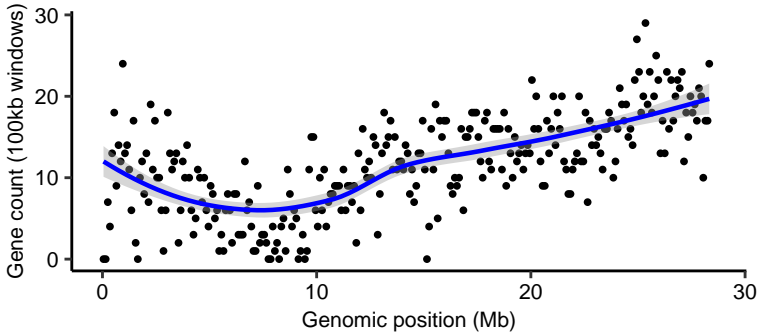

*Brassica napus* chromosome A10

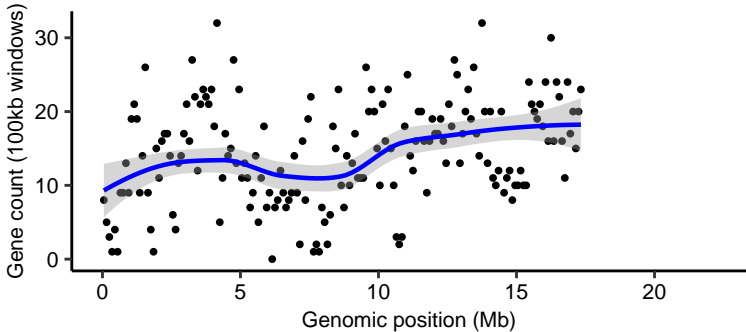

*Brassica rapa* chromosome A10

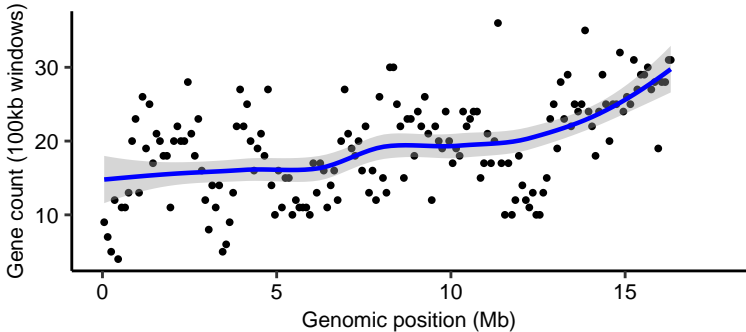

*Camelina sativa* chromosome 1

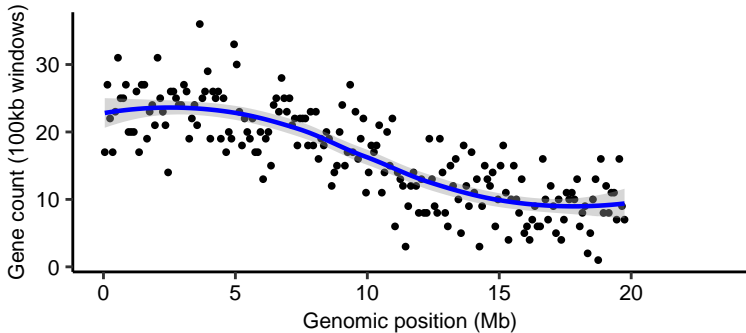

*Camelina sativa* chromosome 11

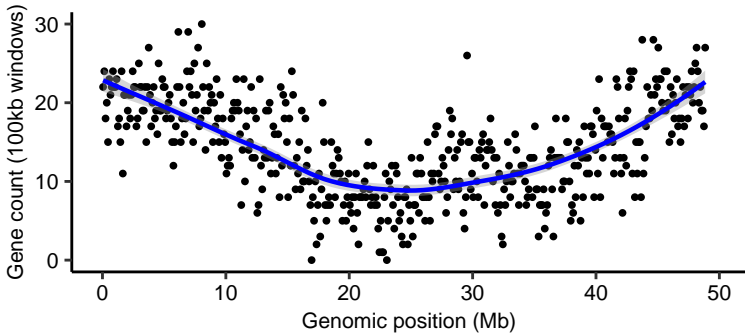

*Camelina sativa* chromosome 13

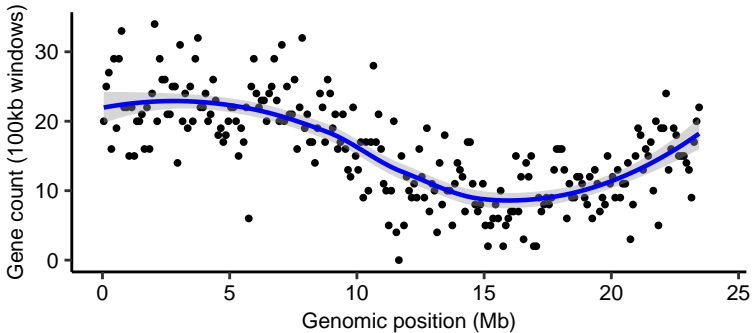

*Camelina sativa* chromosome 15

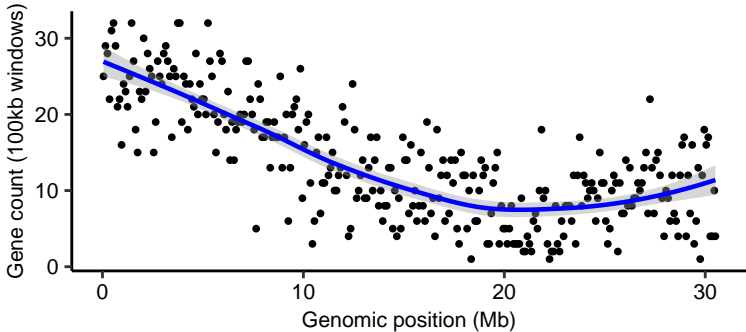



*Camelina sativa* chromosome 16

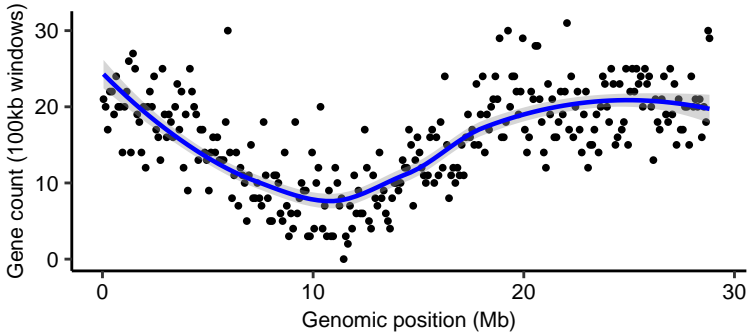

*Camelina sativa* chromosome 17

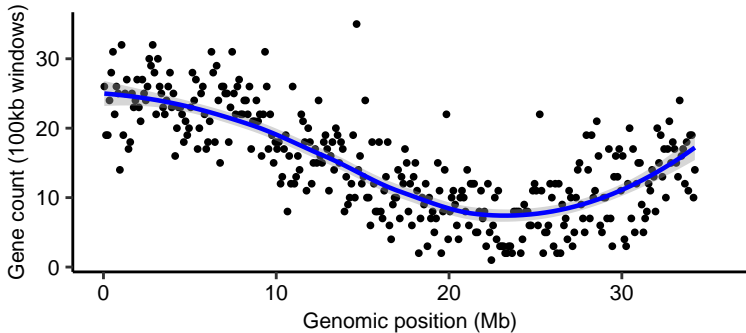

*Camelina sativa* chromosome 19

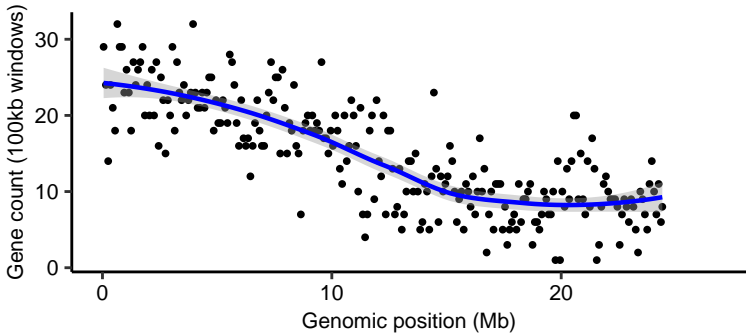

*Camelina sativa* chromosome 2

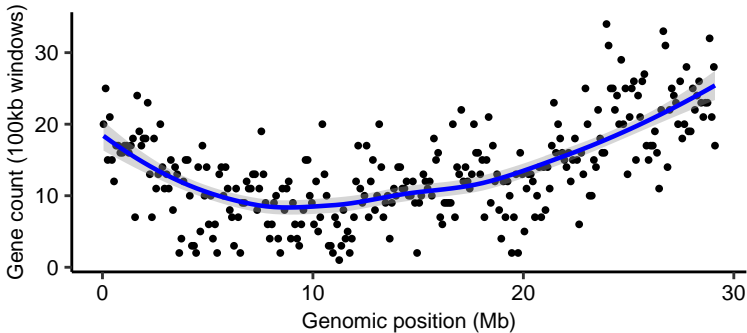

*Camelina sativa* chromosome 20

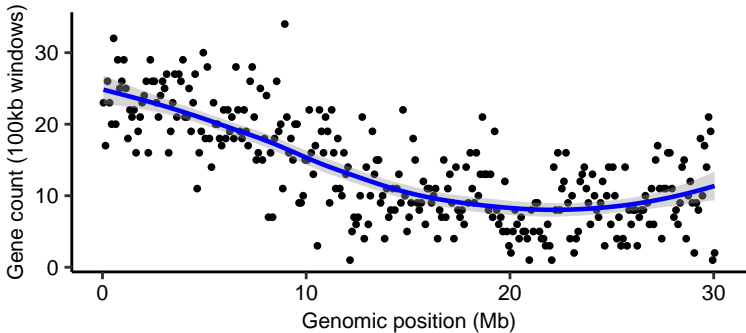

*Camelina sativa* chromosome 3

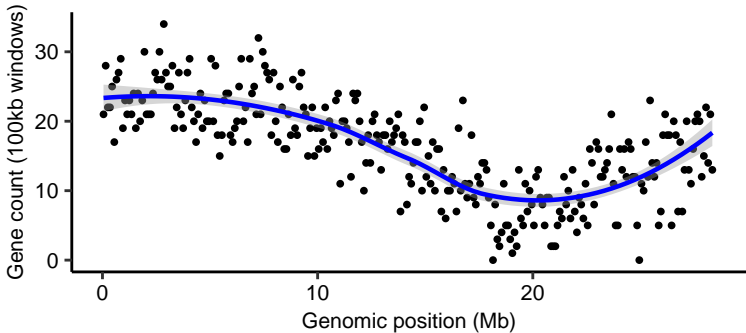

*Camelina sativa* chromosome 4

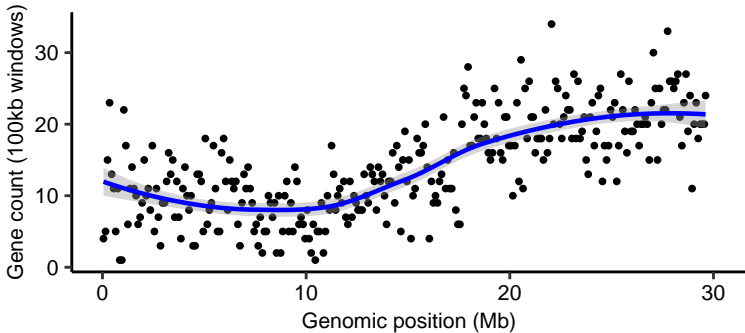

*Camelina sativa* chromosome 5

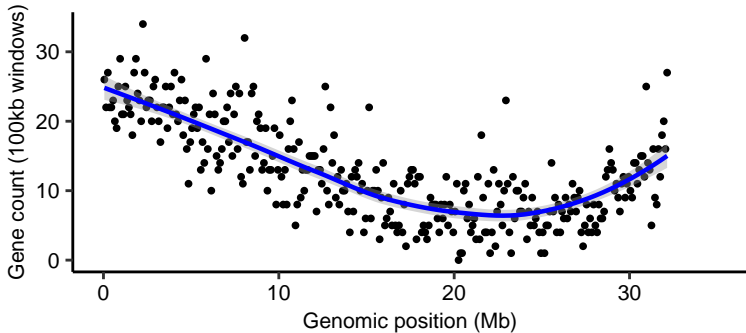



*Camelina sativa* chromosome 6

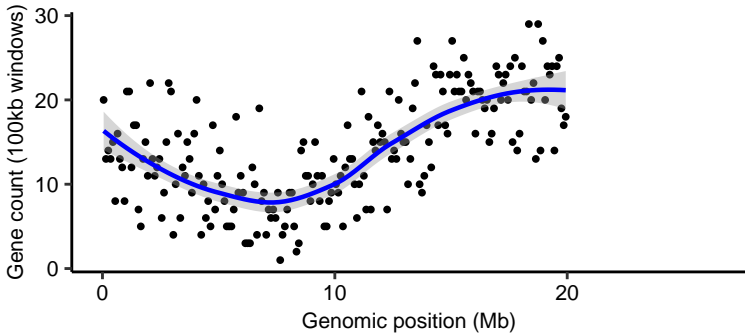

*Camelina sativa* chromosome 7

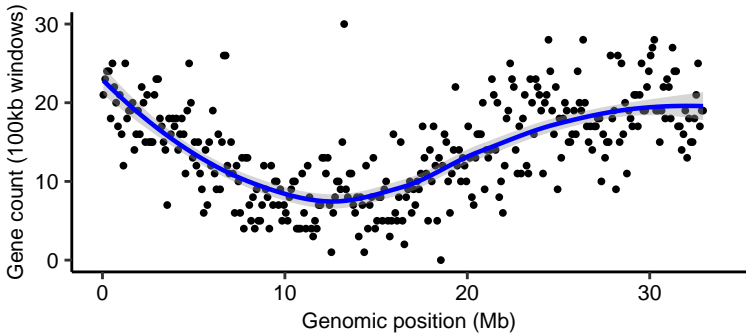

*Camelina sativa* chromosome 8

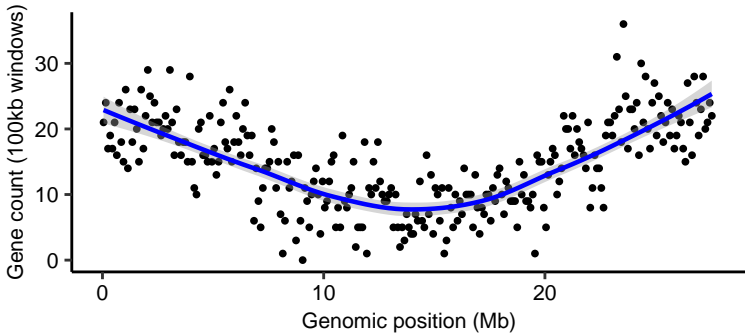

*Camellia sinensis* chromosome 1

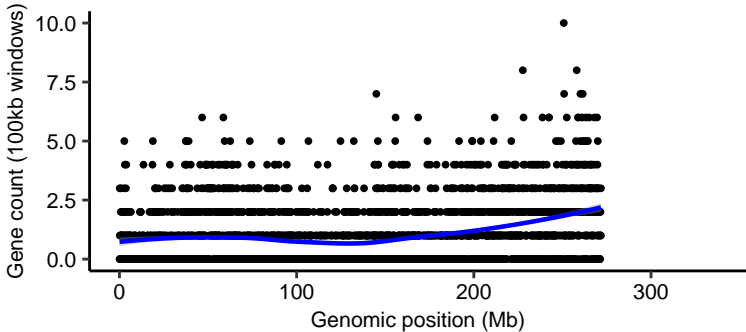

# *Camellia sinensis* chromosome 15

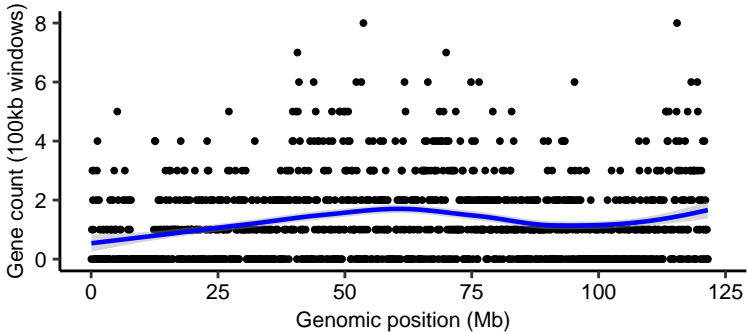

### *Camellia sinensis* chromosome 3

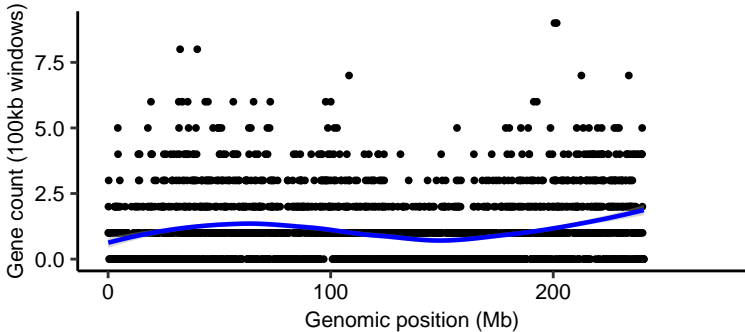

# *Camellia sinensis* chromosome 8

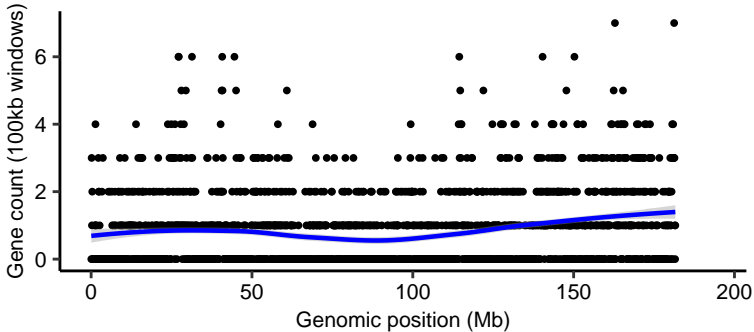

# *Camellia sinensis* chromosome 9

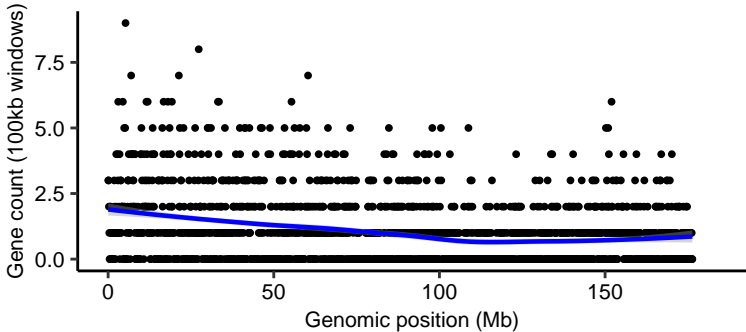



# *Capsella rubella* chromosome 1

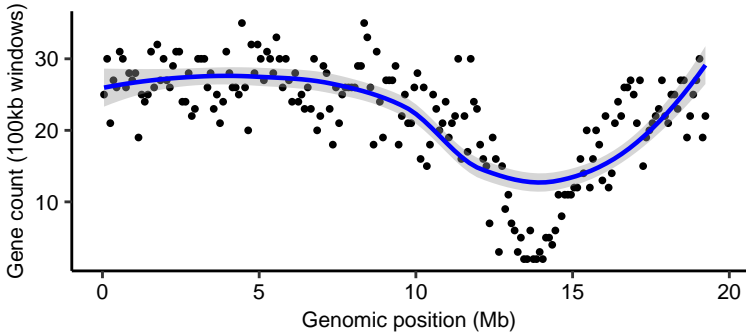

## *Capsella rubella* chromosome 2

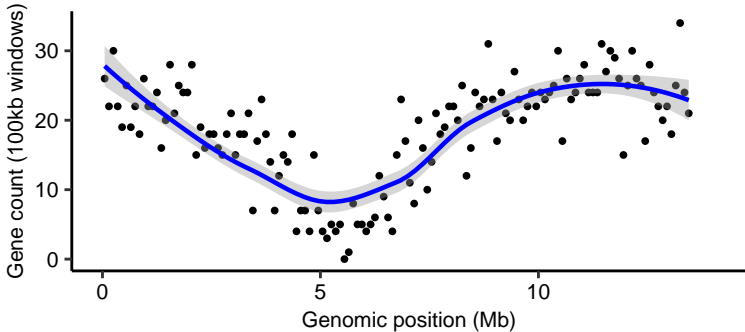

### *Capsella rubella* chromosome 3

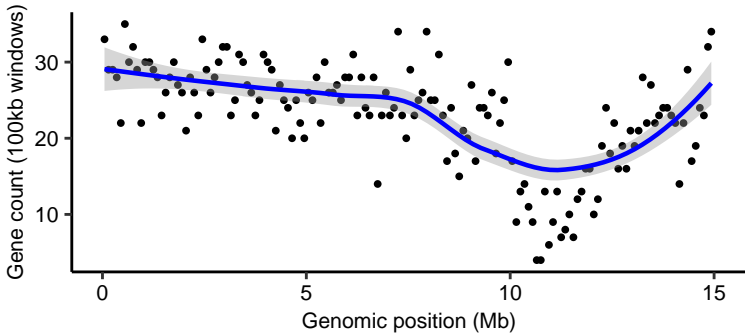

### *Capsella rubella* chromosome 4

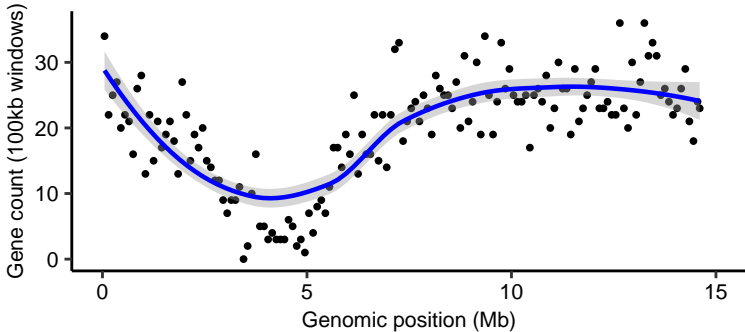

# *Capsella rubella* chromosome 6

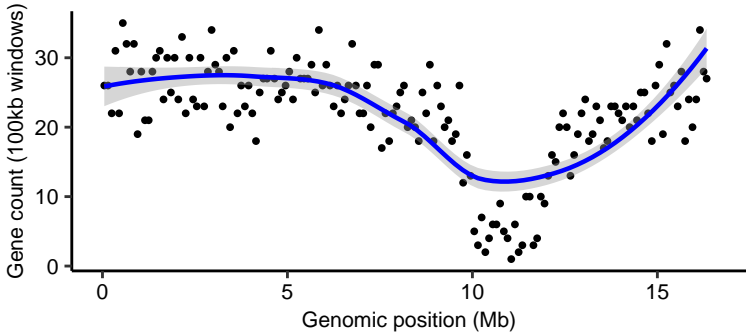

# *Capsella rubella* chromosome 7

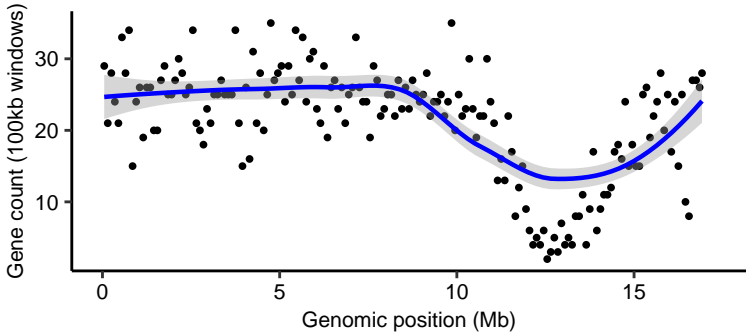

### *Capsella rubella* chromosome 8

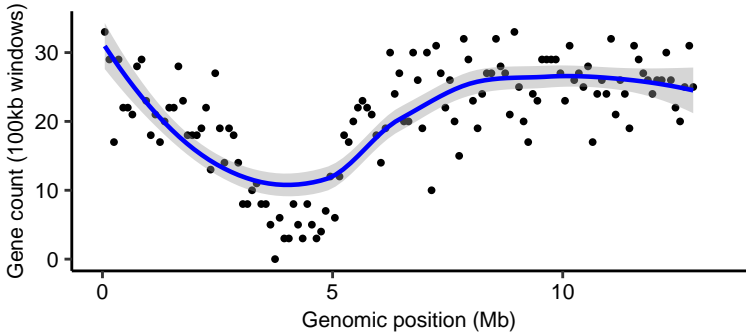

# *Cucumis melo* chromosome 1

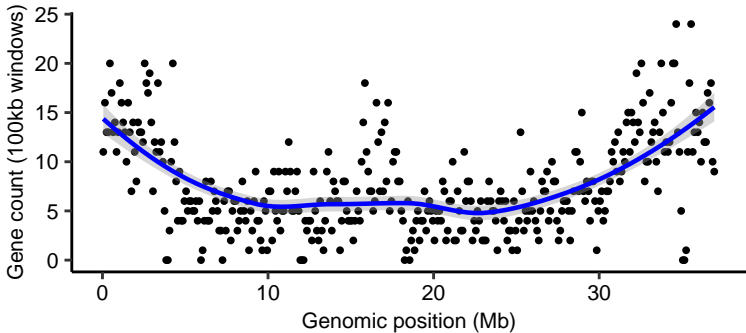



*Cucumis melo* chromosome 10

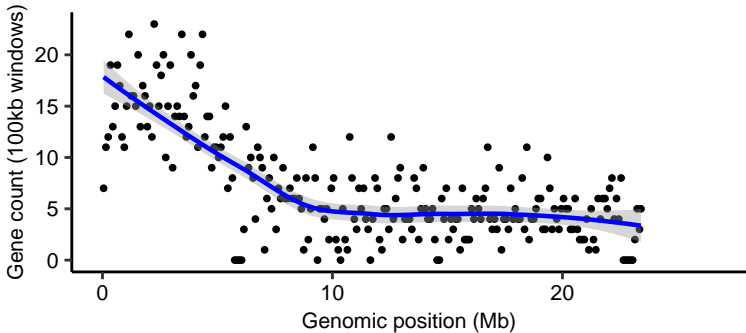

*Cucumis melo* chromosome 12

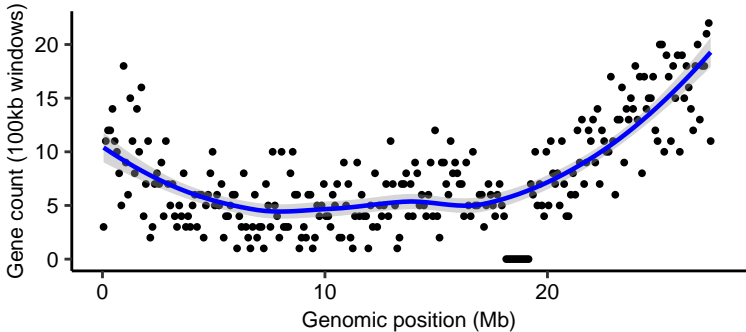

*Cucumis melo* chromosome 2

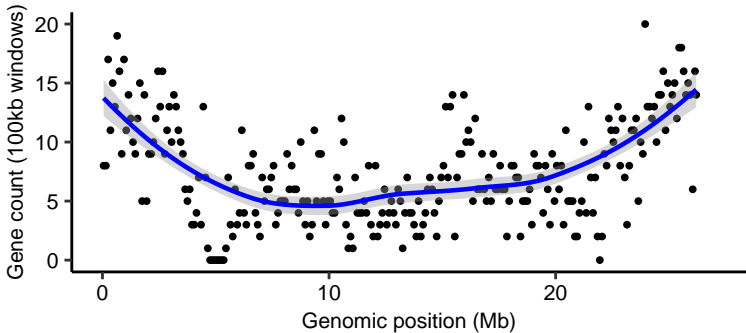

### *Cucumis melo* chromosome 3

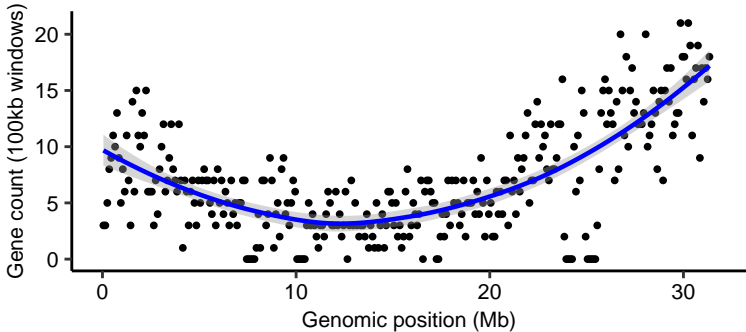

# *Cucumis melo* chromosome 4

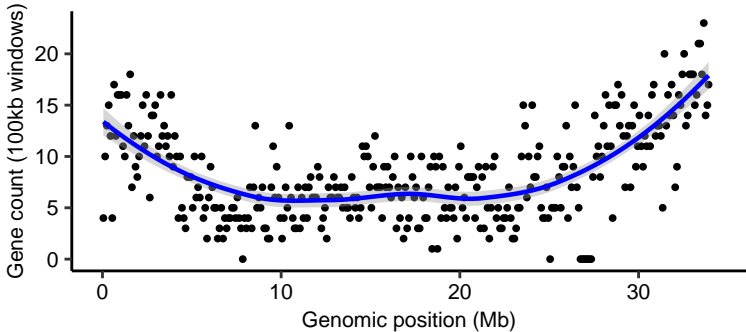

# *Cucumis melo* chromosome 5

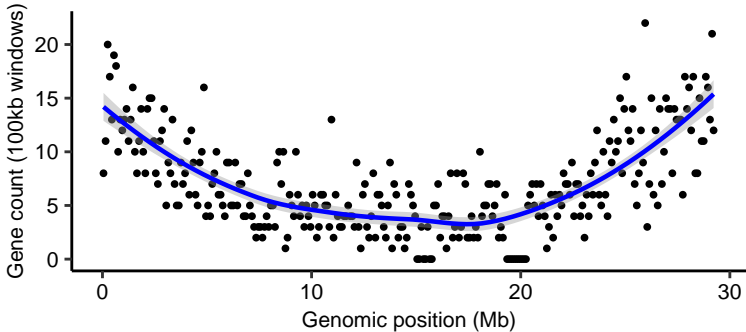

*Cucumis melo* chromosome 6

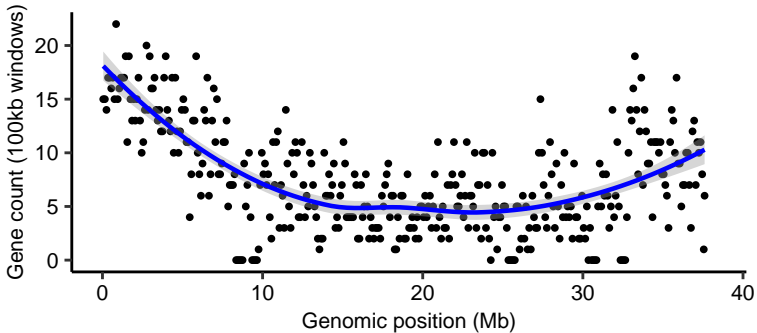

*Cucumis melo* chromosome 7

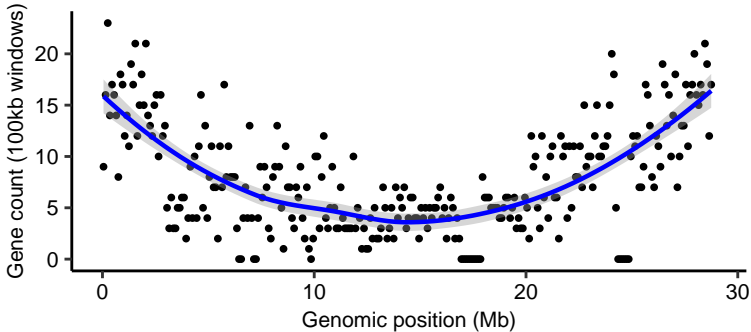



### *Cucumis melo* chromosome 8

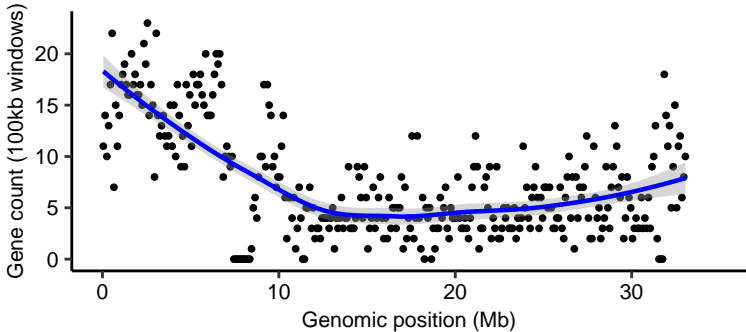

# *Cucumis melo* chromosome 9

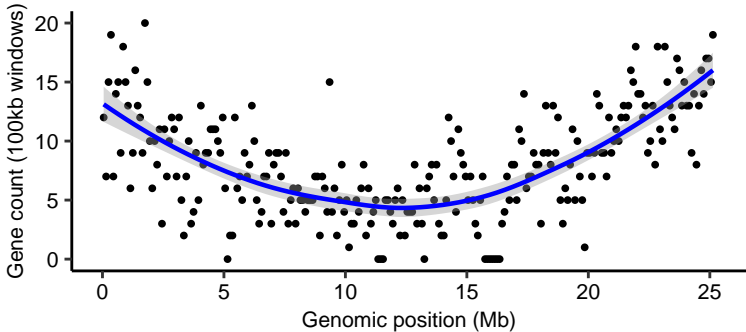

*Cucumis sativus* chromosome 1

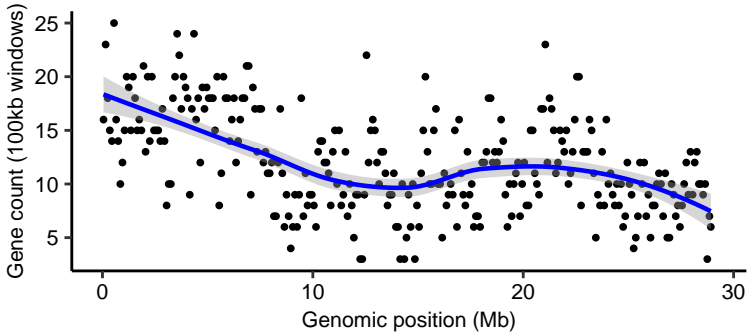

*Cucumis sativus* chromosome 2

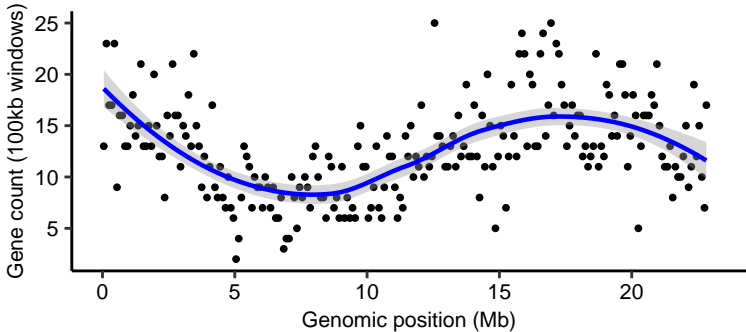

*Cucumis sativus* chromosome 3

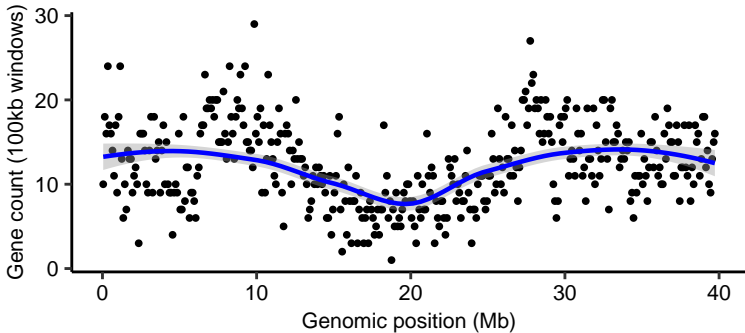

*Cucumis sativus* chromosome 4

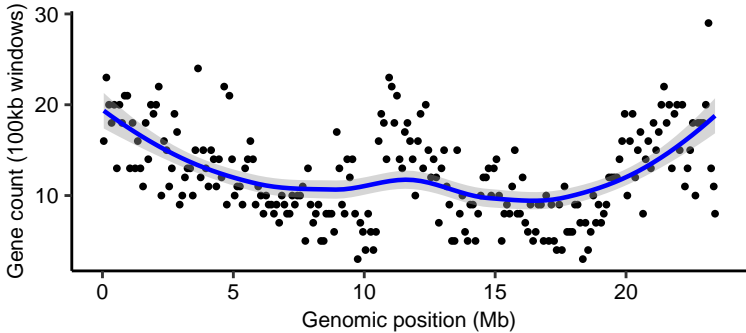

*Cucumis sativus* chromosome 5

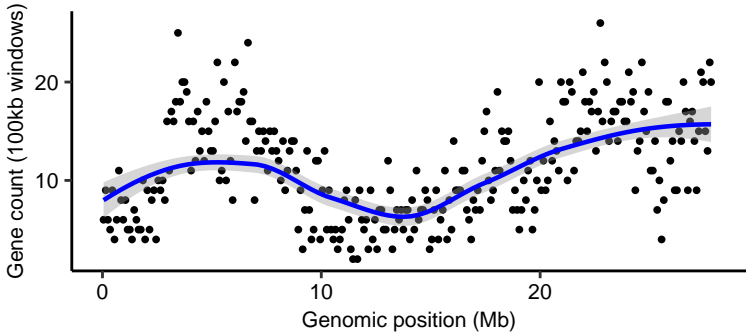

*Cucumis sativus* chromosome 6

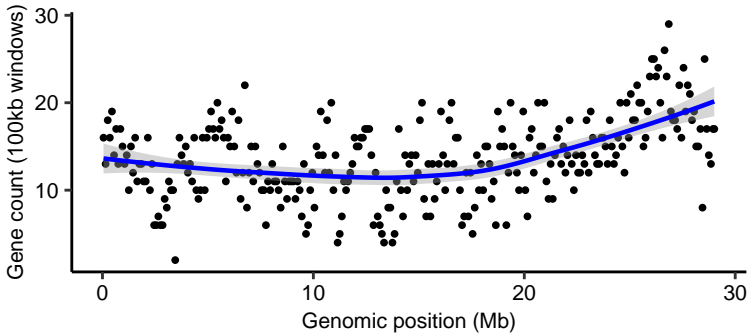



*Cucumis sativus* chromosome 7

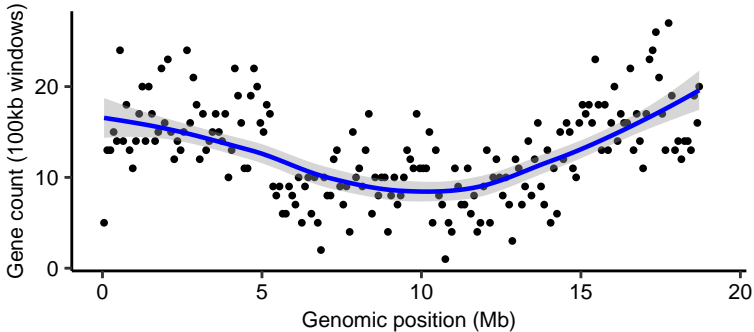

*Cucurbita maxima* chromosome 1

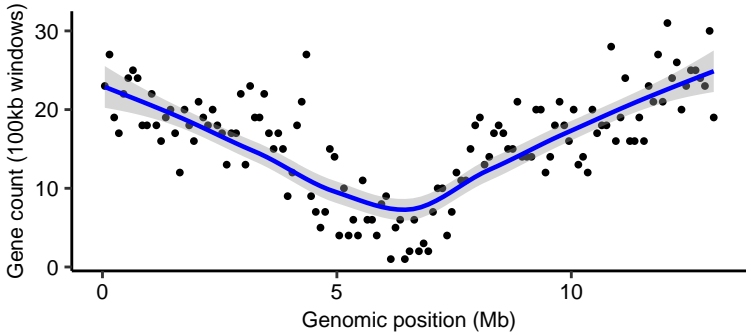

*Cucurbita maxima* chromosome 10

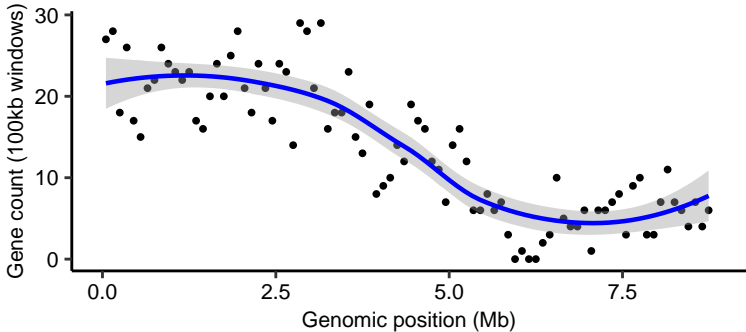

*Cucurbita maxima* chromosome 11

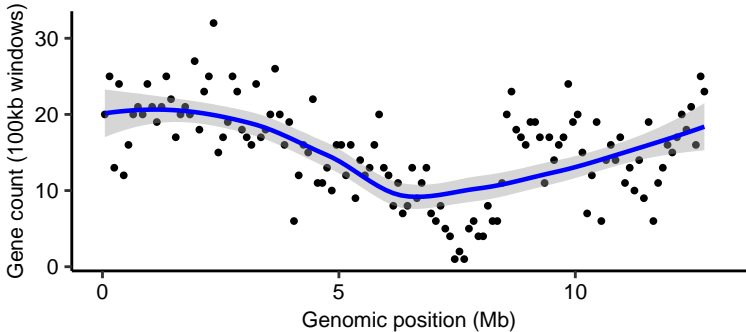

# *Cucurbita maxima* chromosome 12

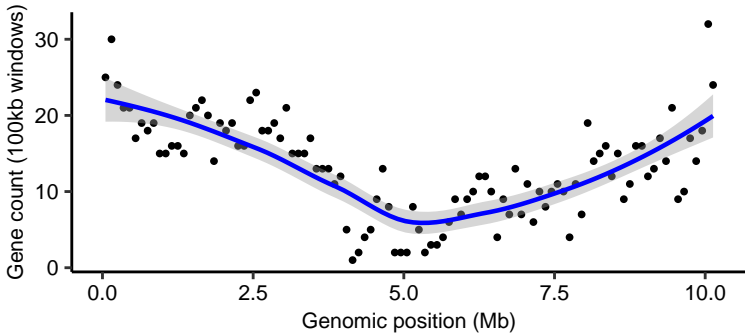

### *Cucurbita maxima* chromosome 13

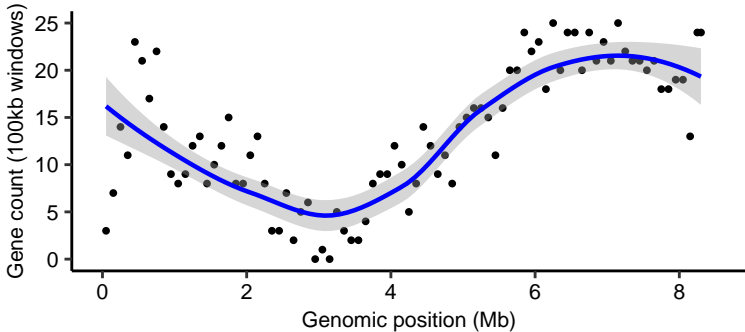

# *Cucurbita maxima* chromosome 15

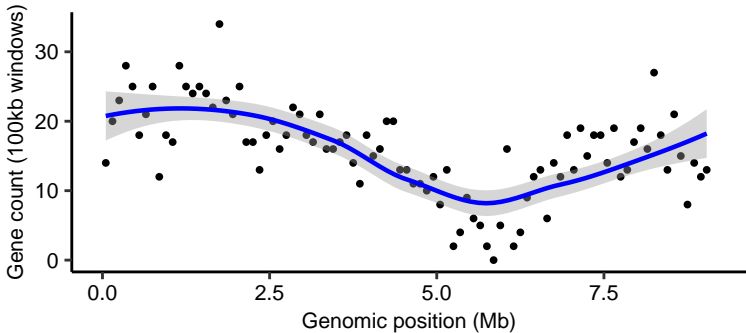

### *Cucurbita maxima* chromosome 16

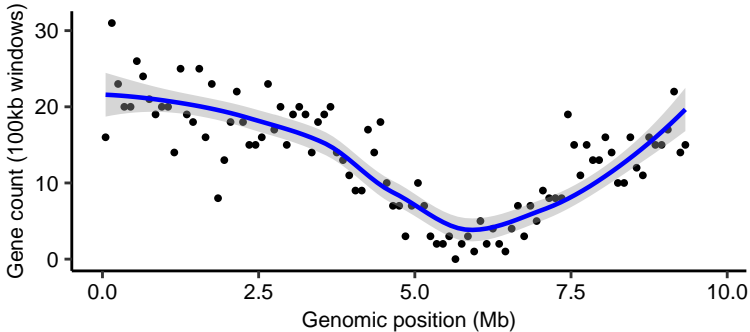



# *Cucurbita maxima* chromosome 17

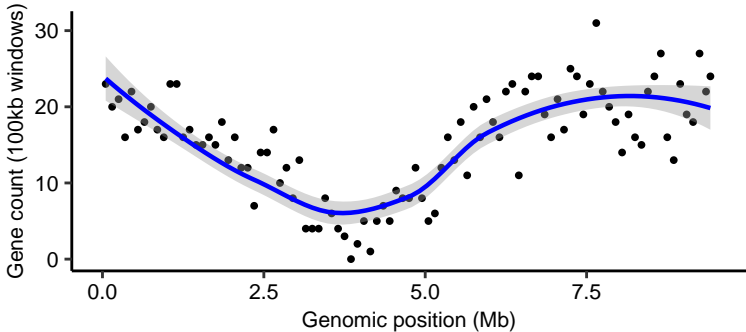

### *Cucurbita maxima* chromosome 18

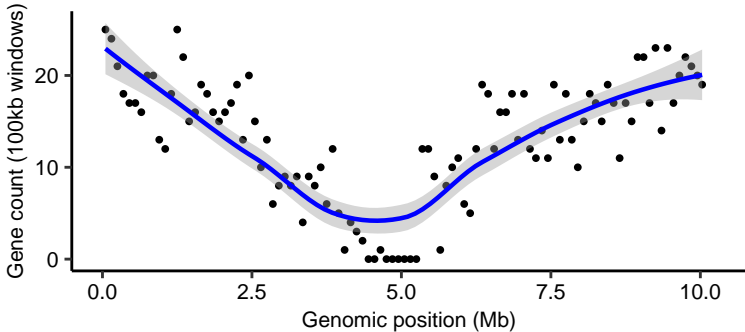

*Cucurbita maxima* chromosome 19

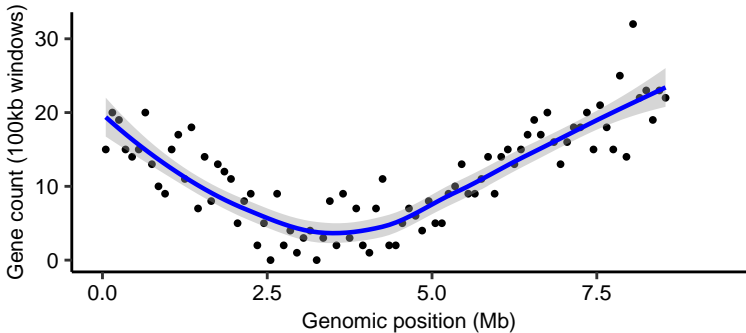

*Cucurbita maxima* chromosome 2

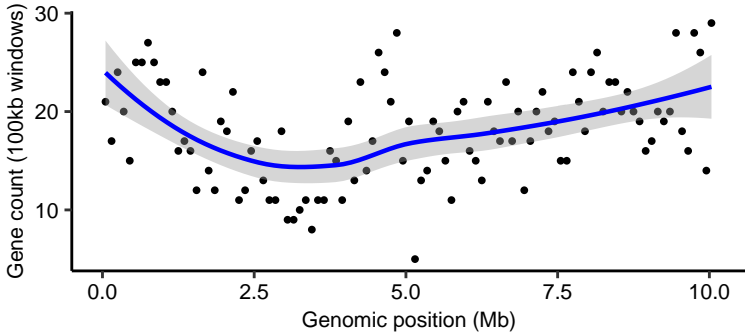

# *Cucurbita maxima* chromosome 20

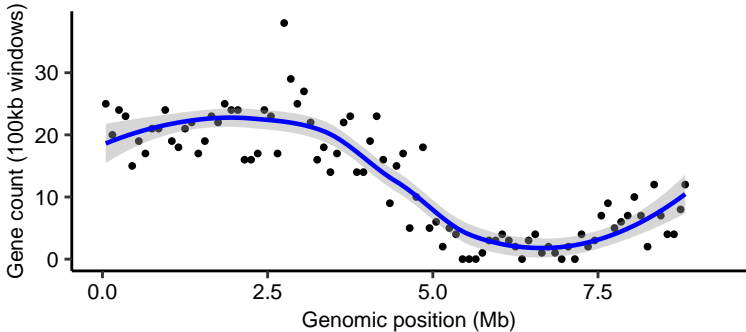

### *Cucurbita maxima* chromosome 3

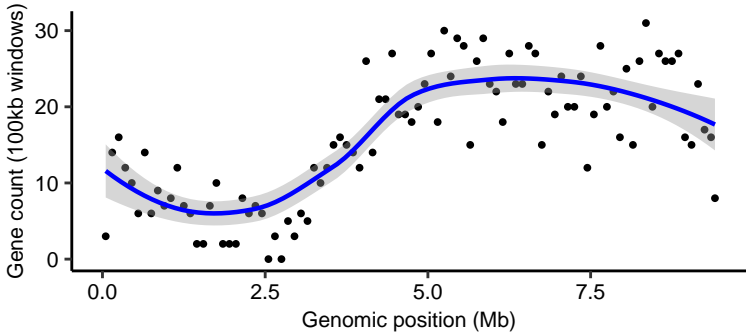

*Cucurbita maxima* chromosome 4

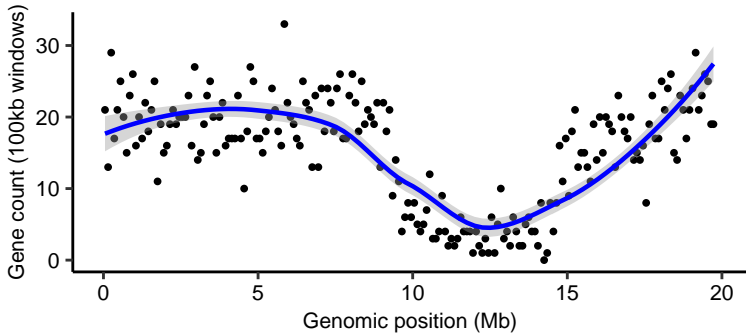

*Cucurbita maxima* chromosome 5

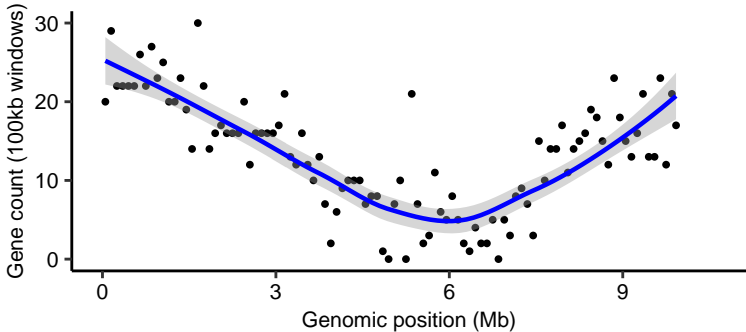



*Cucurbita maxima* chromosome 6

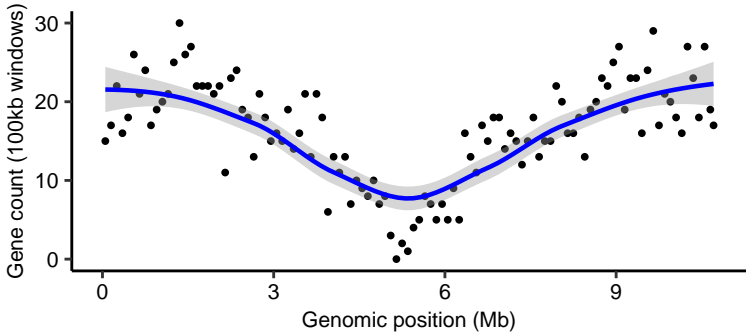

# *Cucurbita maxima* chromosome 7

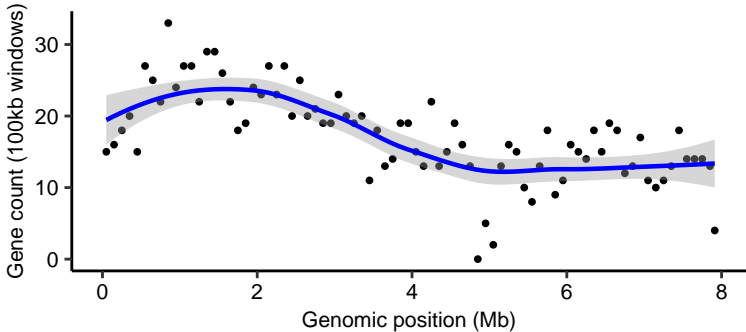

# *Cucurbita maxima* chromosome 8

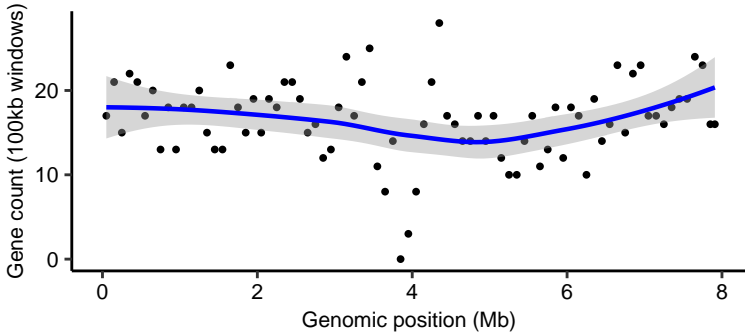

*Cucurbita maxima* chromosome 9

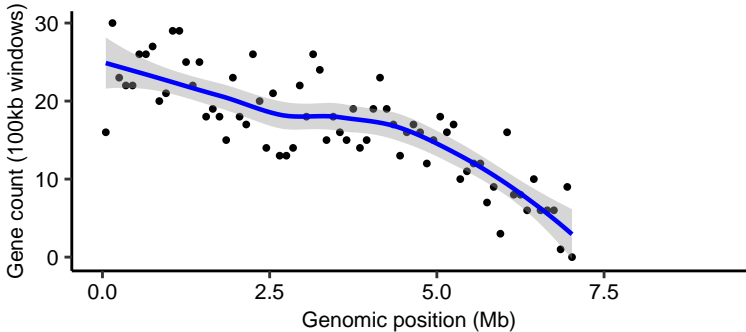

# *Cucurbita pepo* chromosome 1

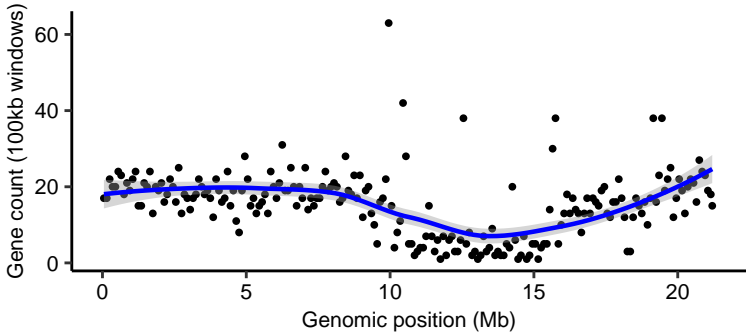

*Cucurbita pepo* chromosome 10

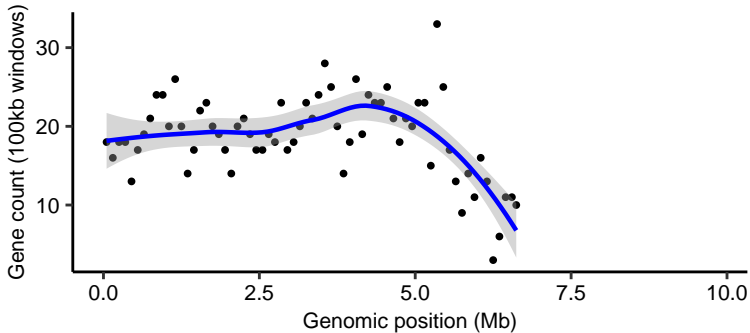

*Cucurbita pepo* chromosome 11

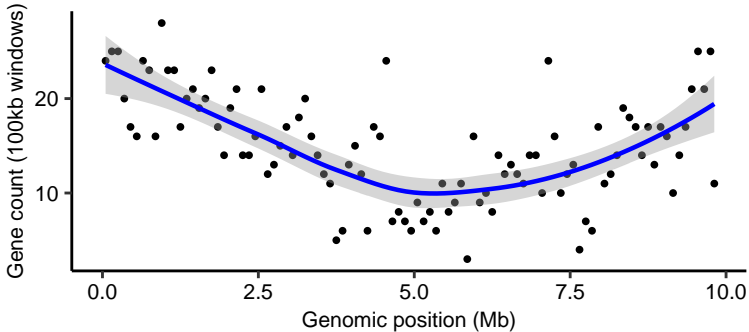

*Cucurbita pepo* chromosome 12

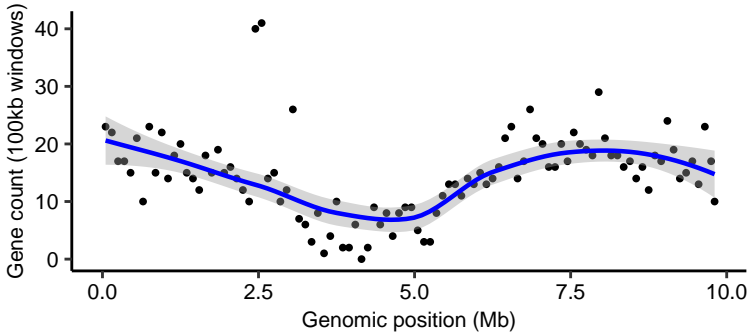



### *Cucurbita pepo* chromosome 13

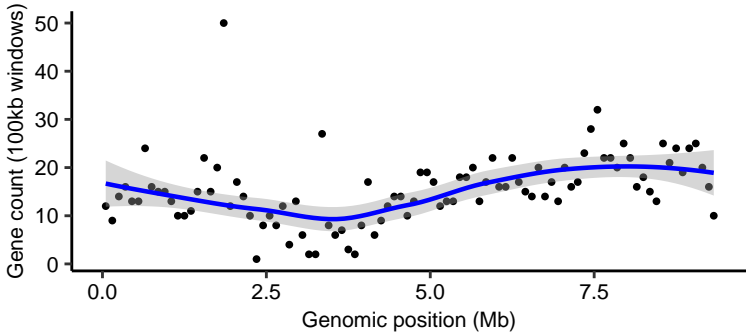

*Cucurbita pepo* chromosome 15

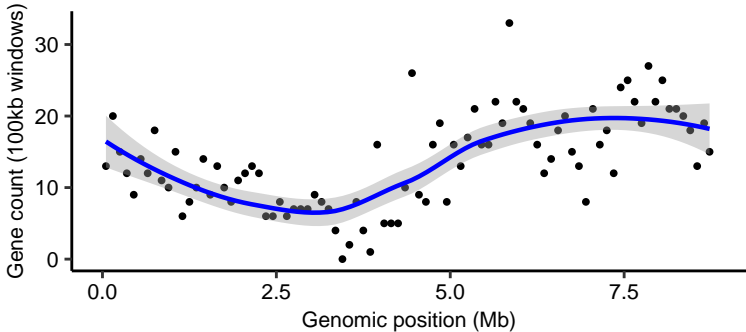

*Cucurbita pepo* chromosome 16

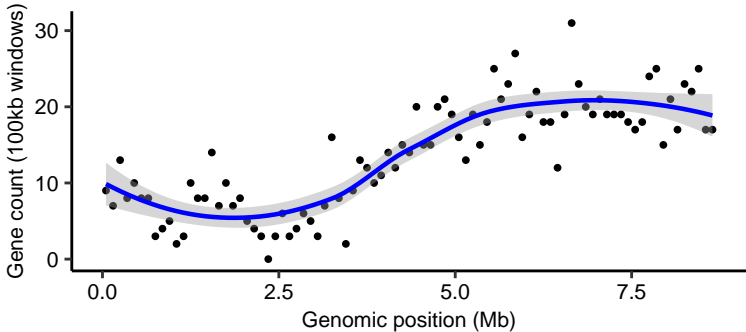

*Cucurbita pepo* chromosome 17

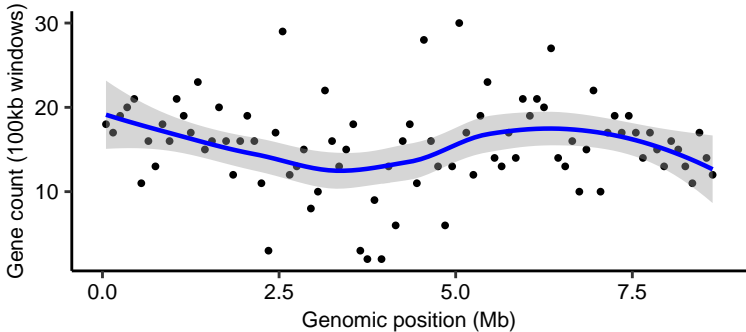

### *Cucurbita pepo* chromosome 19

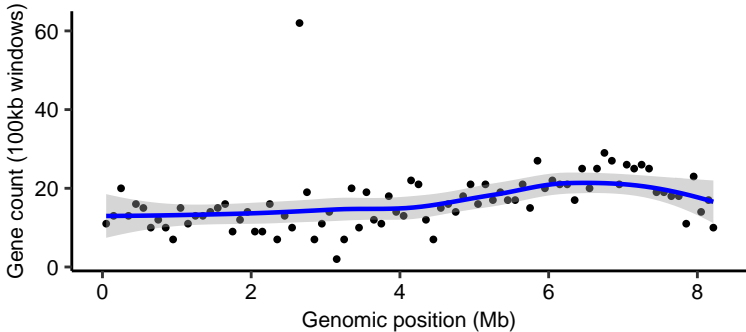

## *Cucurbita pepo* chromosome 2

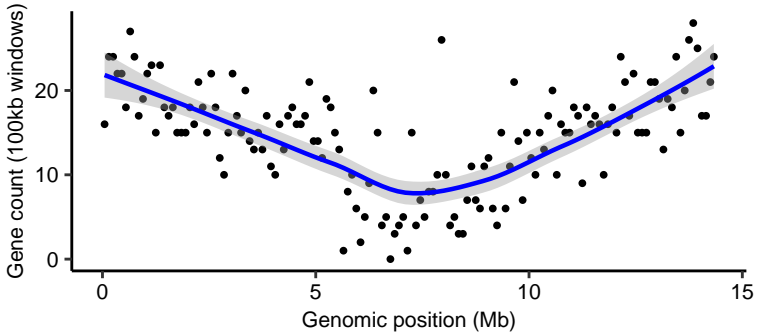

### *Cucurbita pepo* chromosome 3

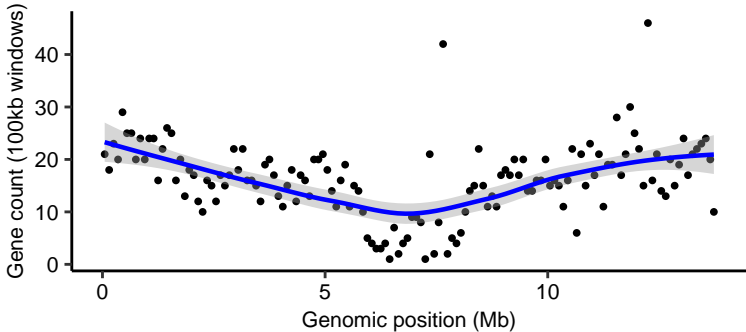

### *Cucurbita pepo* chromosome 5

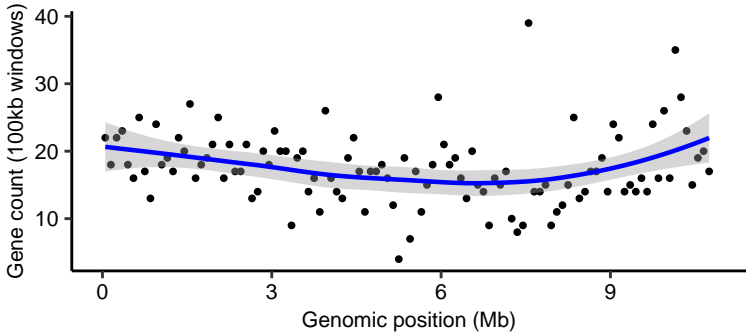



### *Cucurbita pepo* chromosome 6

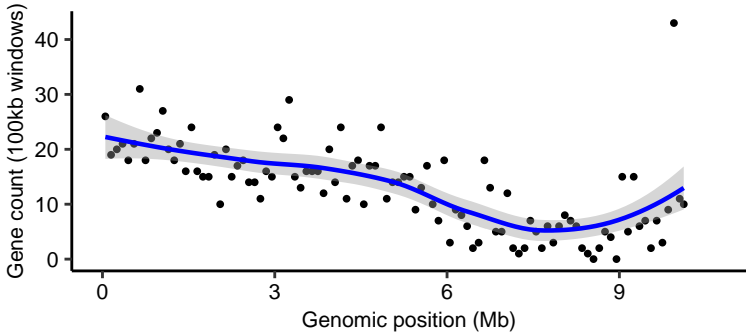

### *Cucurbita pepo* chromosome 7

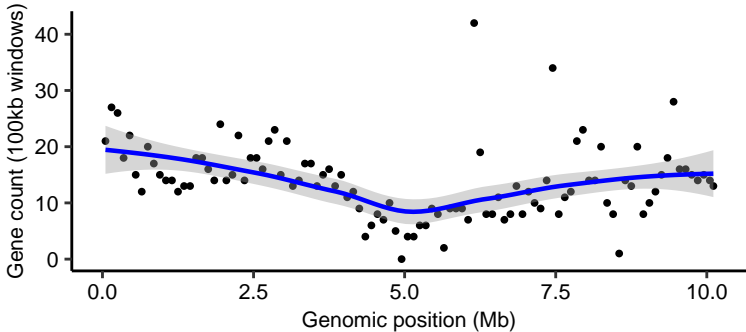

### *Cucurbita pepo* chromosome 8

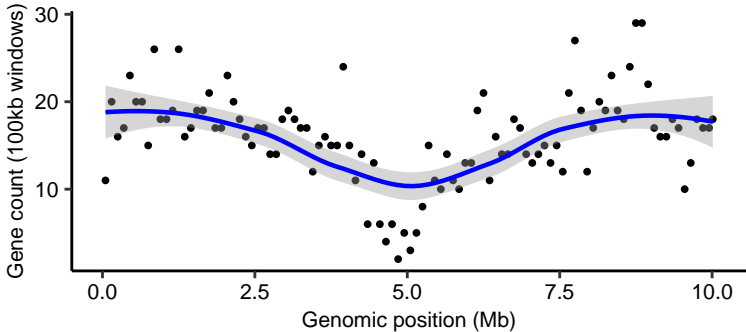

*Cucurbita pepo* chromosome 9

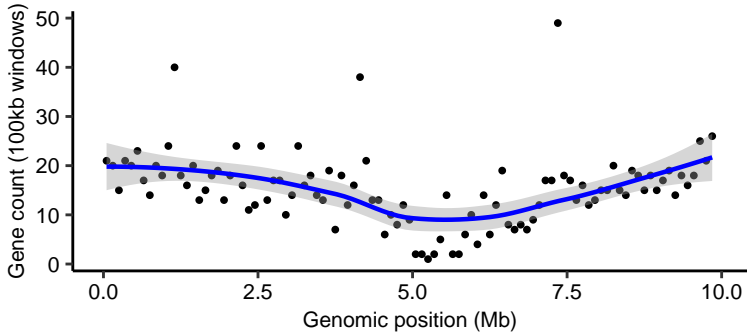

*Dioscorea alata* chromosome 10

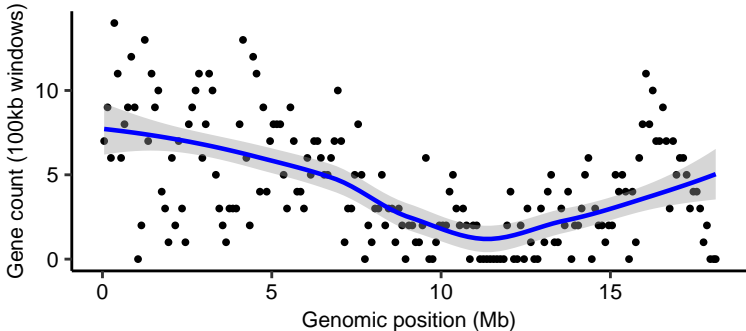

*Dioscorea alata* chromosome 11

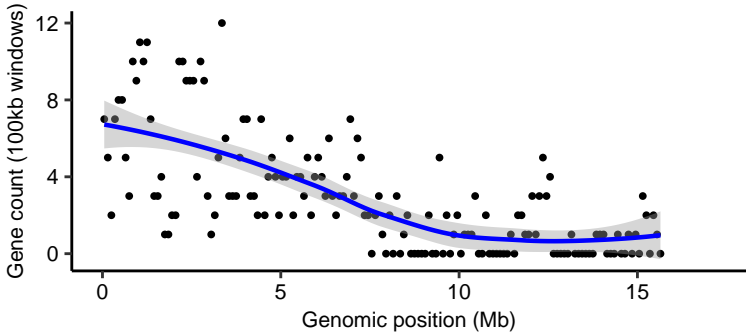

*Dioscorea alata* chromosome 13

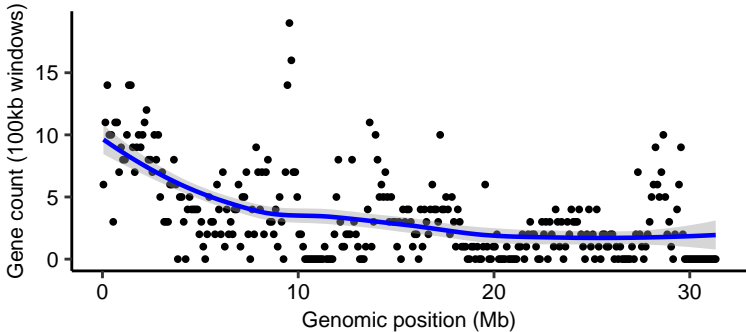

*Dioscorea alata* chromosome 17

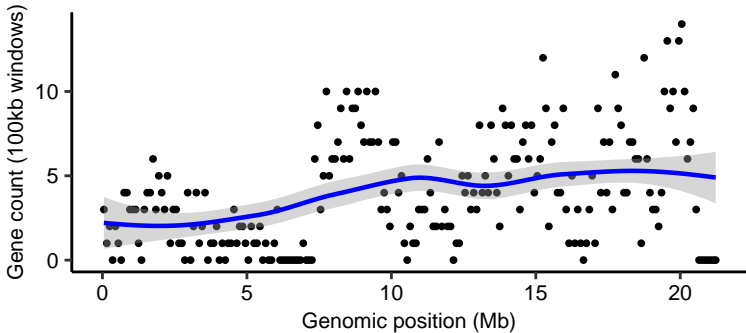



*Dioscorea alata* chromosome 2

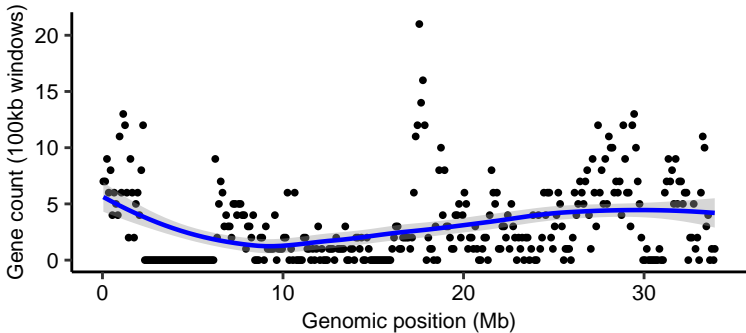

*Dioscorea alata* chromosome 3

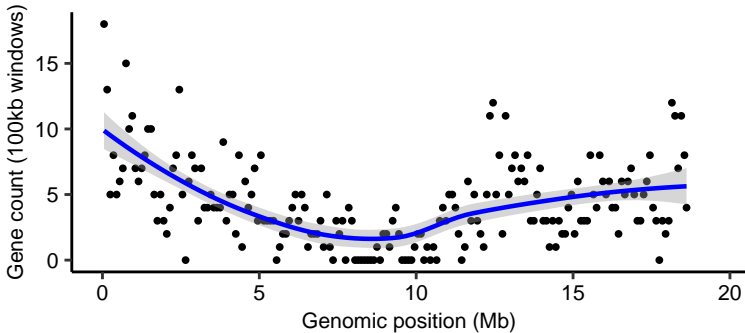

*Dioscorea alata* chromosome 4

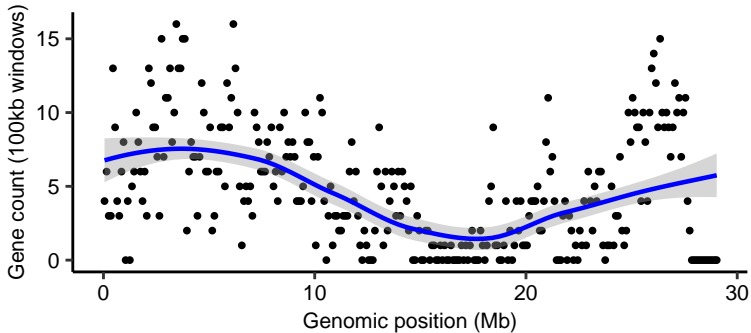

*Dioscorea alata* chromosome 5

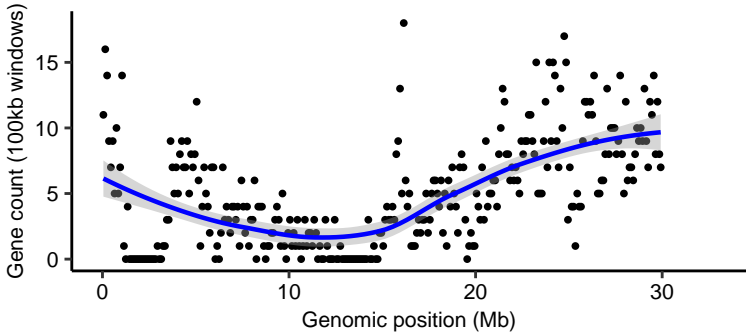

*Dioscorea alata* chromosome 8

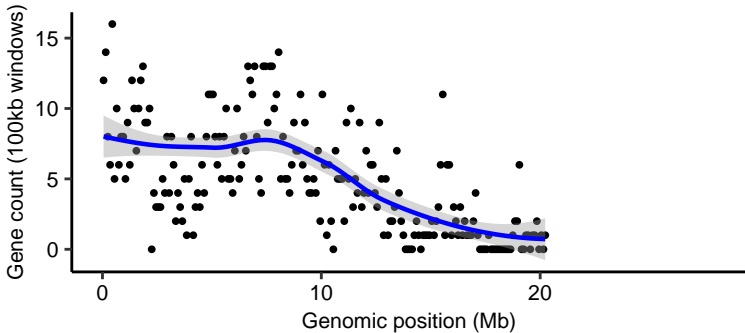

*Elaeis guineensis* chromosome 1

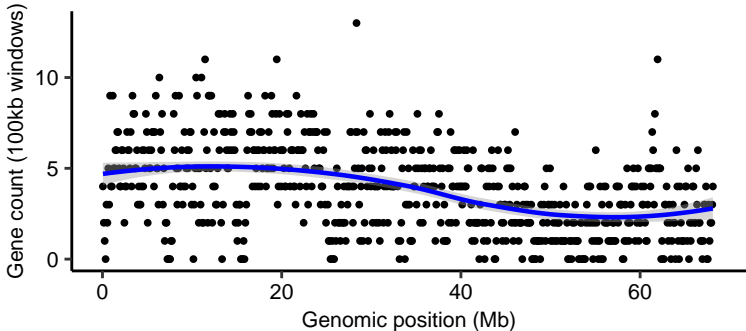

*Elaeis guineensis* chromosome 10

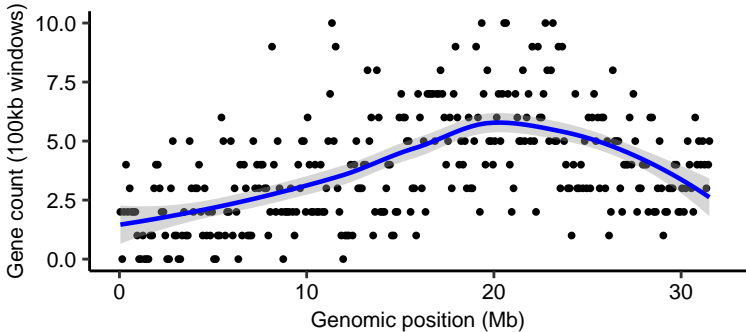

*Elaeis guineensis* chromosome 12

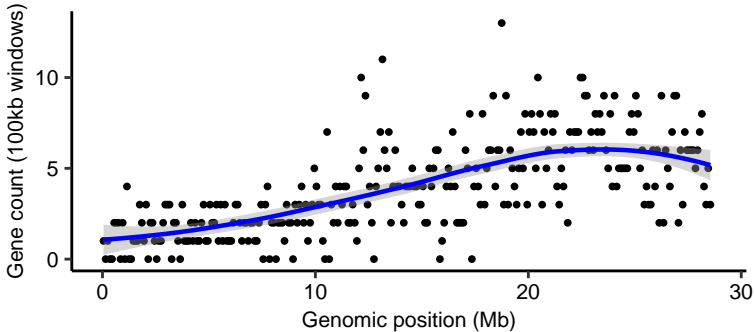



*Elaeis guineensis* chromosome 14

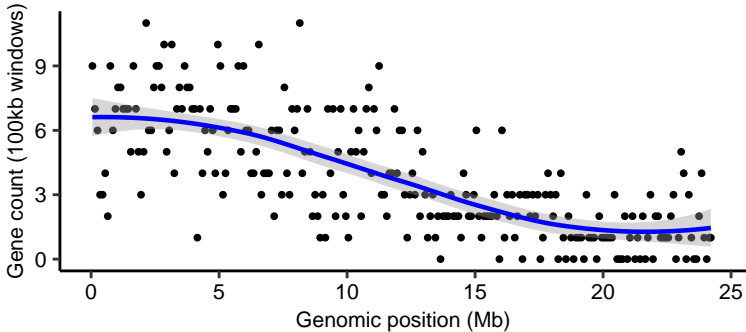

*Elaeis guineensis* chromosome 2

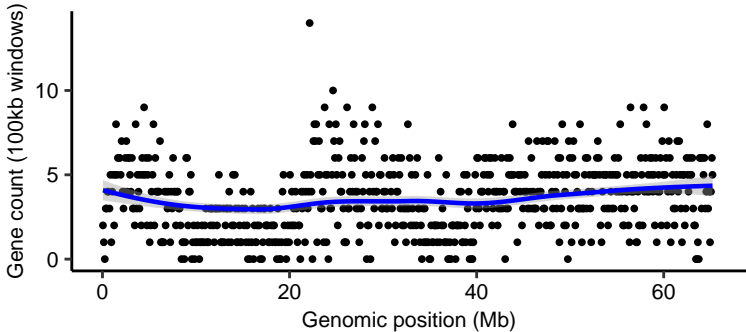

*Elaeis guineensis* chromosome 3

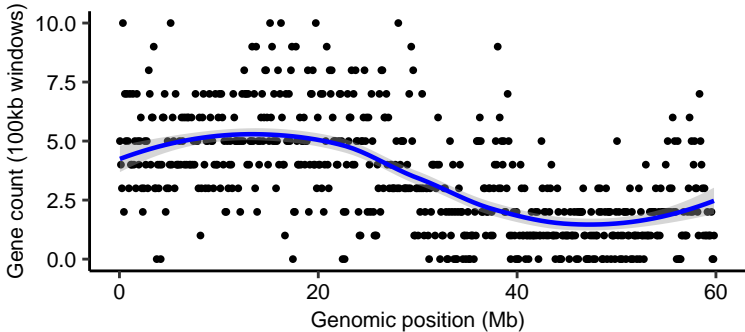

*Elaeis guineensis* chromosome 4

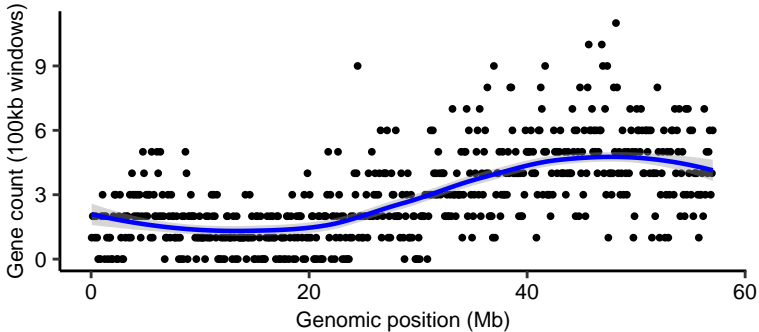

*Elaeis guineensis* chromosome 5

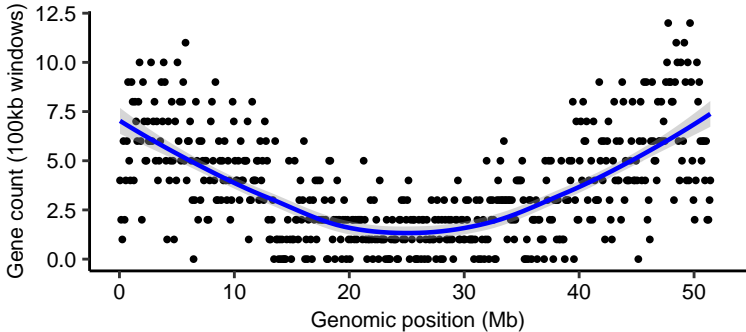

*Elaeis guineensis* chromosome 6

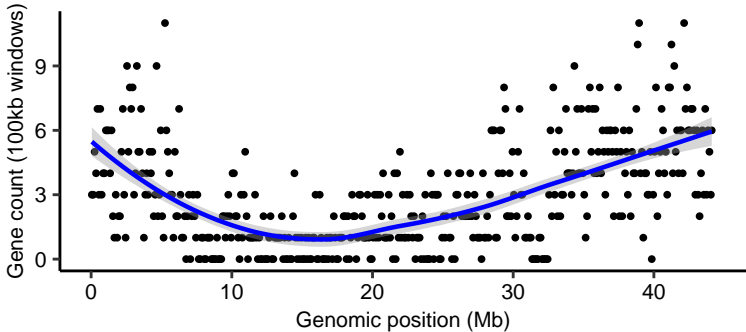

*Elaeis guineensis* chromosome 7

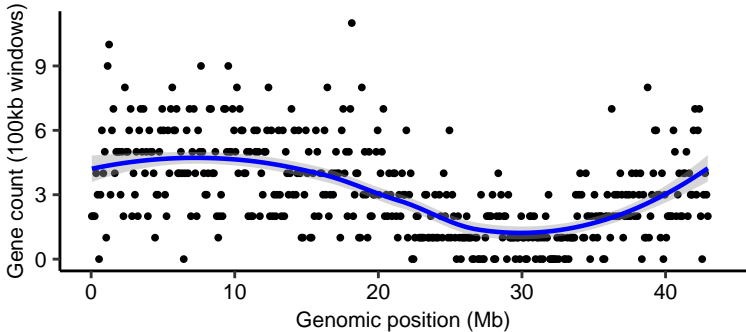

*Elaeis guineensis* chromosome 8

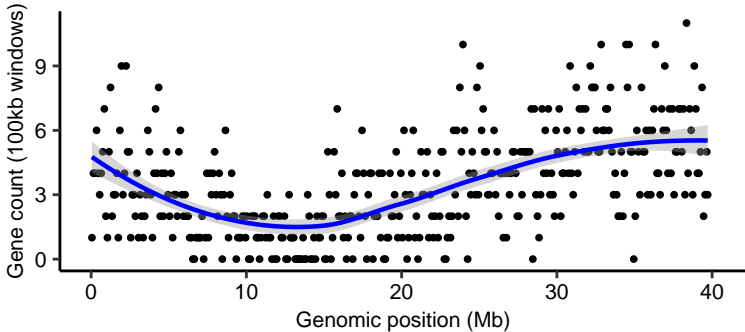



*Eucalyptus grandis* chromosome 1

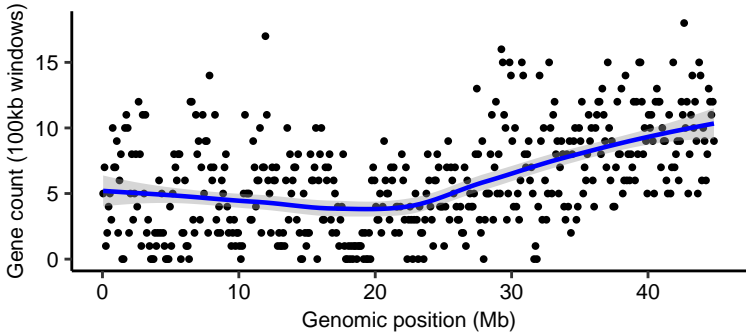

*Eucalyptus grandis* chromosome 10

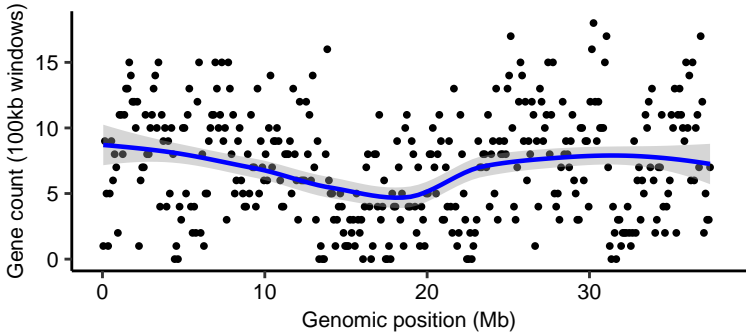

*Eucalyptus grandis* chromosome 11

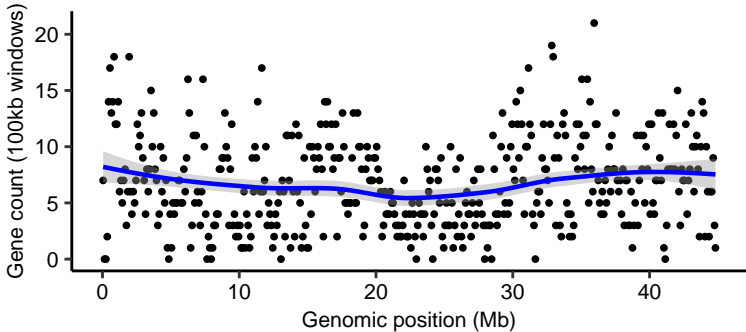

*Eucalyptus grandis* chromosome 2

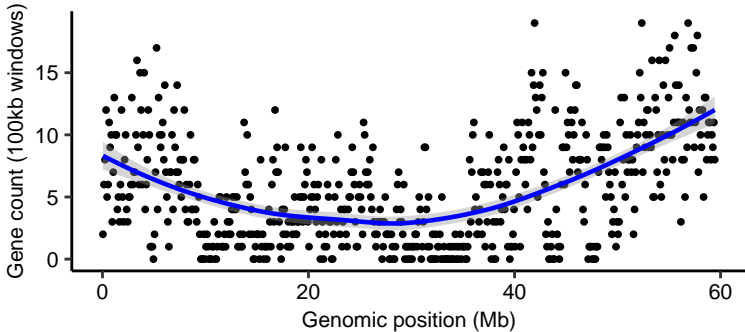

*Eucalyptus grandis* chromosome 3

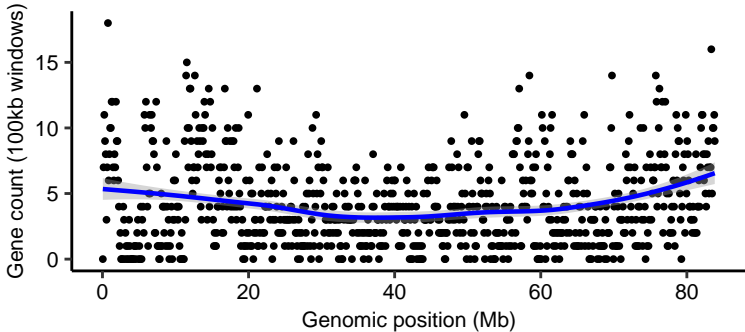

*Eucalyptus grandis* chromosome 4

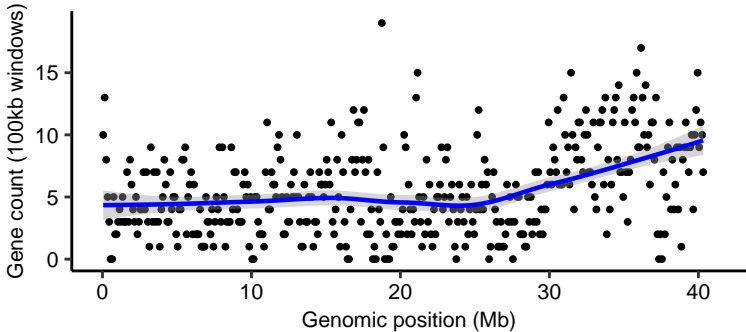

*Eucalyptus grandis* chromosome 5

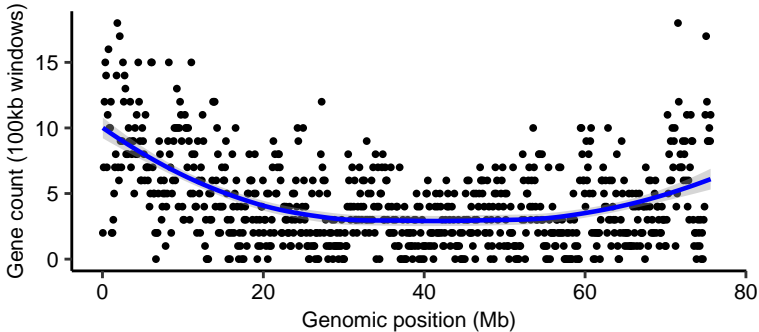

*Eucalyptus grandis* chromosome 6

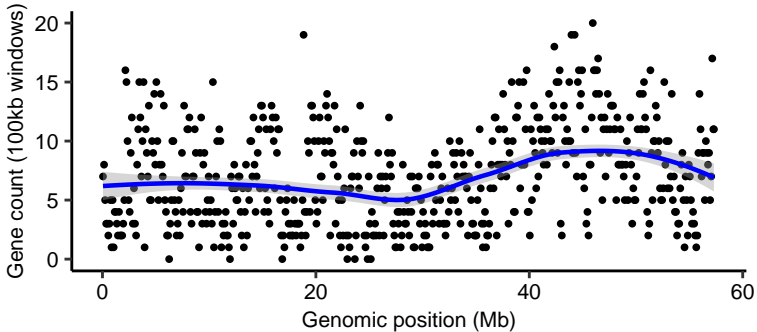



*Eucalyptus grandis* chromosome 7

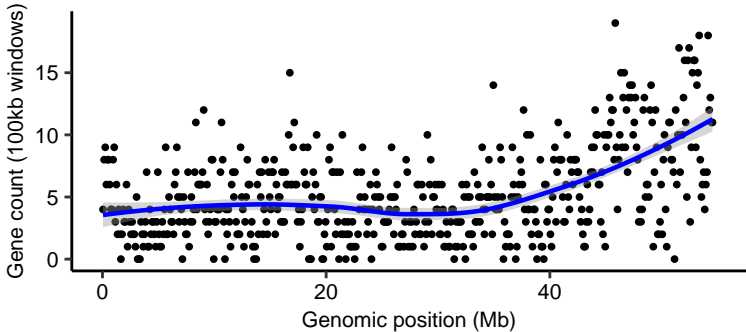

*Eucalyptus grandis* chromosome 8

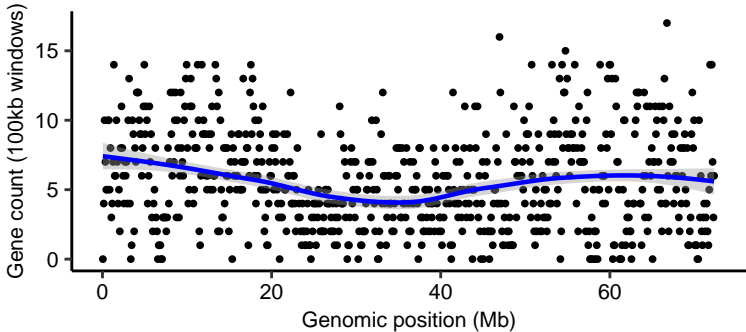

*Eucalyptus grandis* chromosome 9

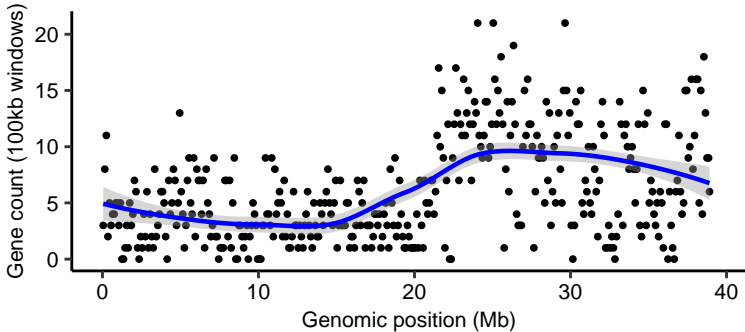

# *Glycine max chromosome 1*

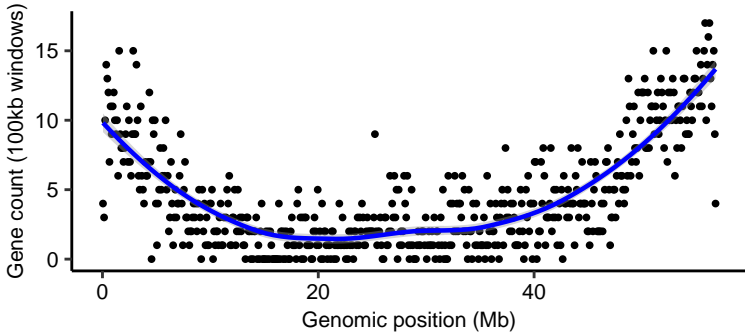

# *Glycine max chromosome 10*

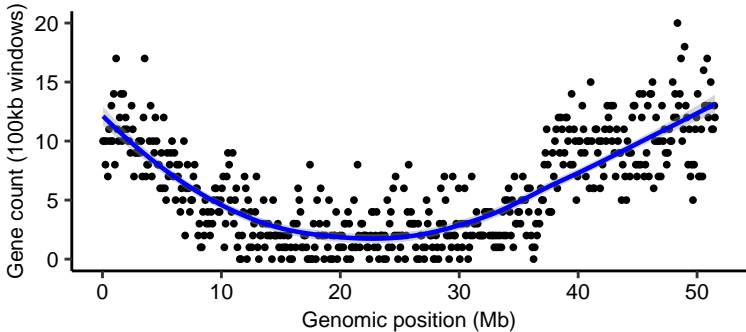

*Glycine max chromosome 12*

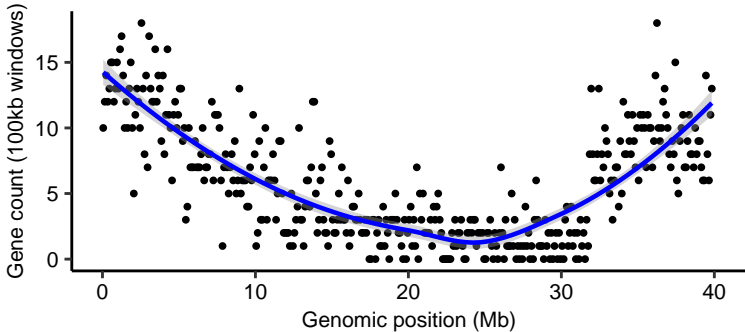

# *Glycine max* chromosome 13

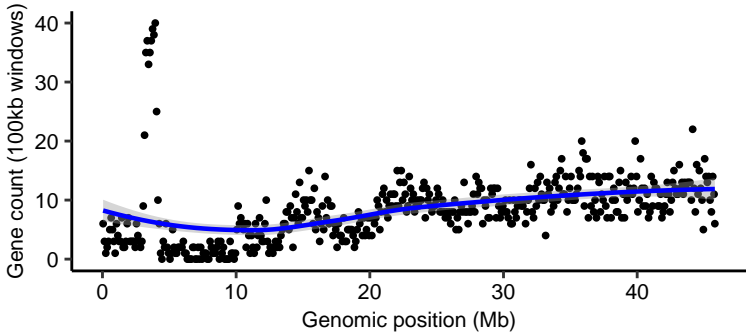

# *Glycine max chromosome 14*

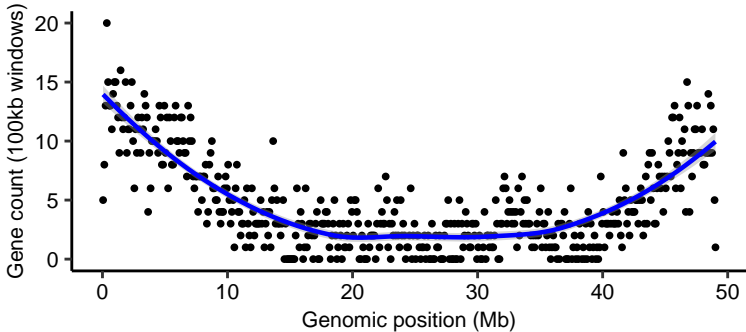



*Glycine max chromosome 15*

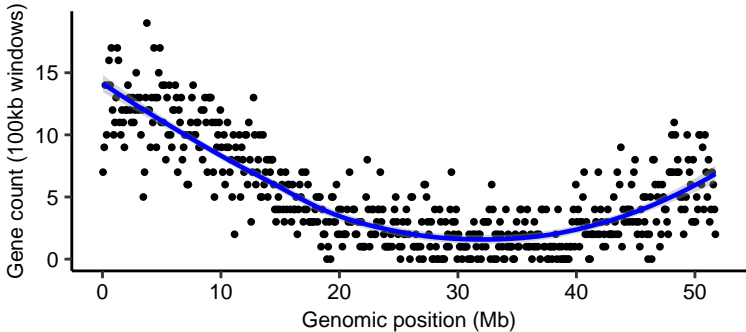

# *Glycine max chromosome 16*

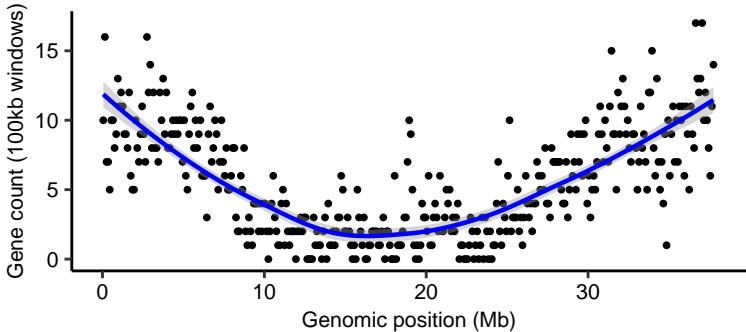

*Glycine max chromosome 17*

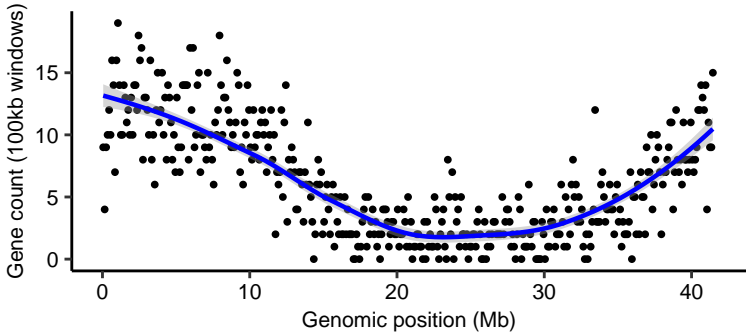

# *Glycine max chromosome 18*

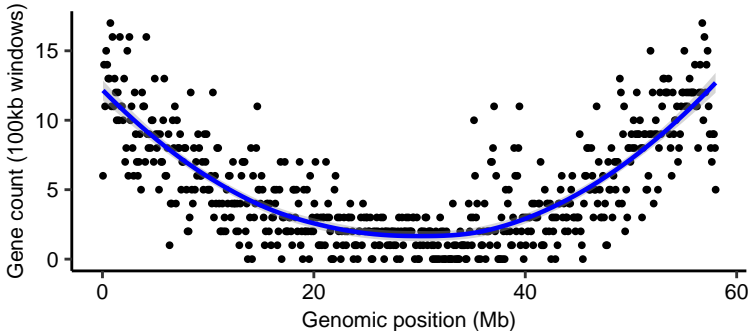

*Glycine max chromosome 19*

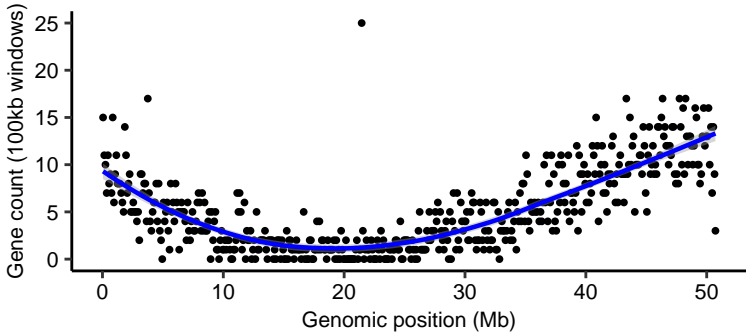

## *Glycine max chromosome 2*

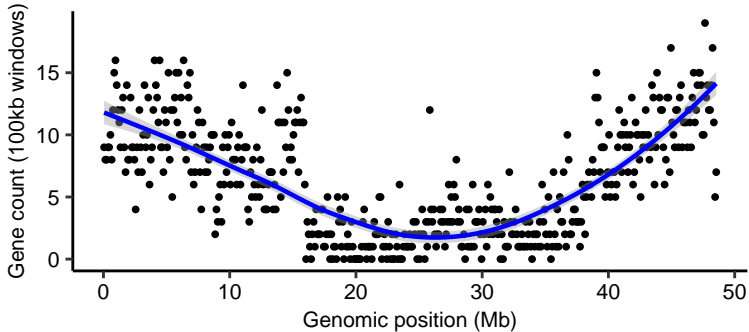

# *Glycine max chromosome 20*

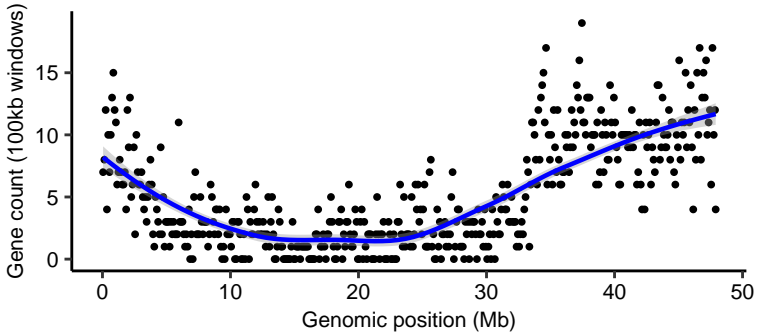

### *Glycine max chromosome 3*

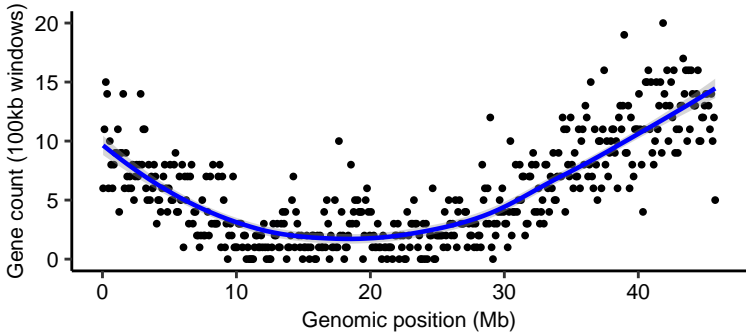



# *Glycine max chromosome 4*

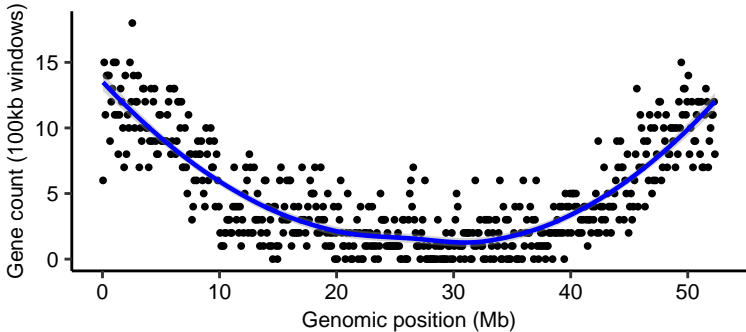

# *Glycine max chromosome 5*

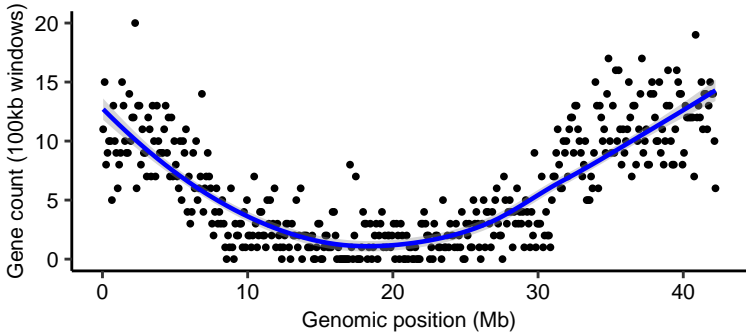

## *Glycine max* chromosome 6

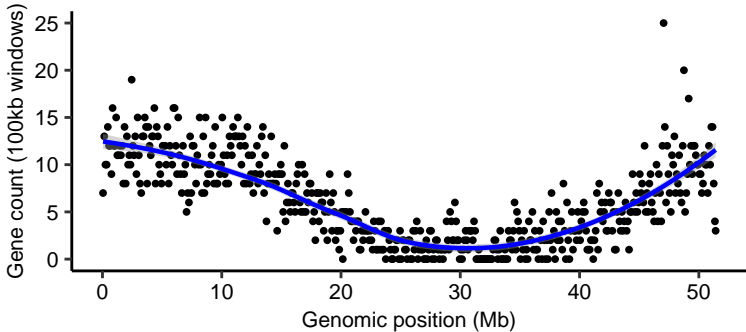

# *Glycine max chromosome 7*

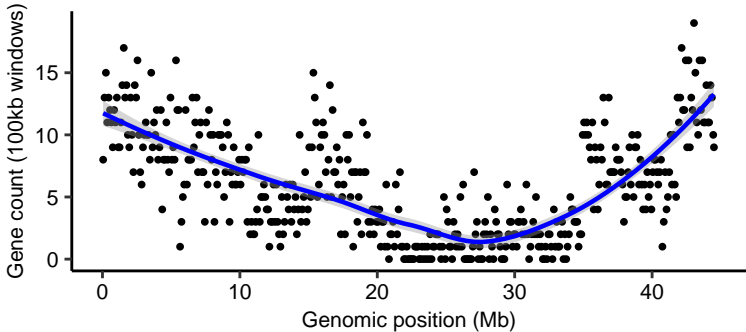

# *Glycine max chromosome 8*

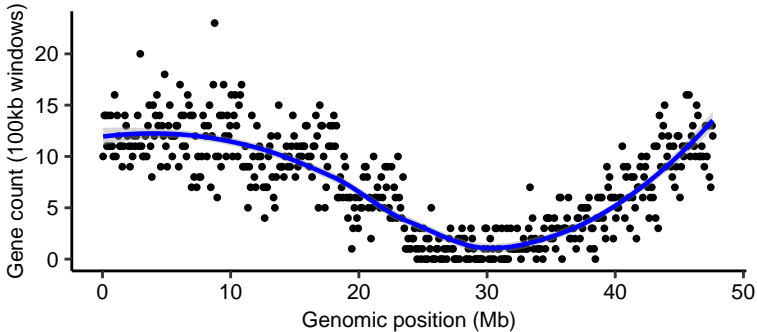

# *Glycine max chromosome 9*

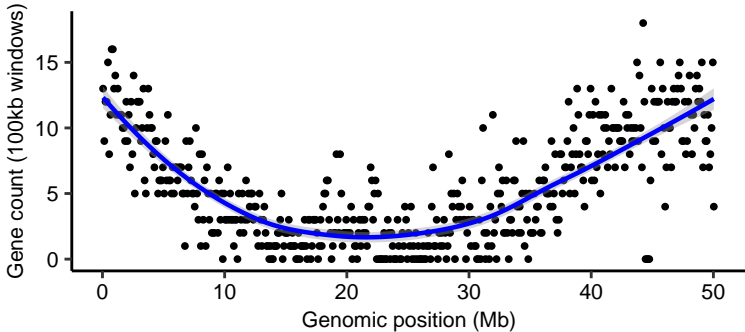

*Gossypium hirsutum* chromosome A01

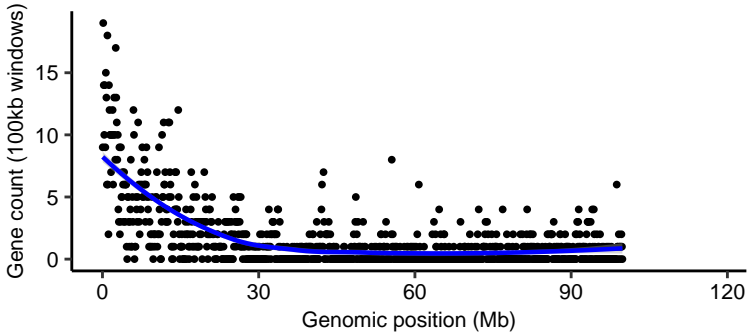

*Gossypium hirsutum* chromosome A02

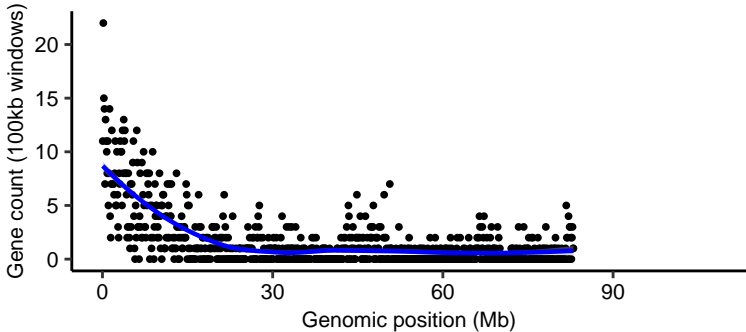



# *Gossypium hirsutum* chromosome A03

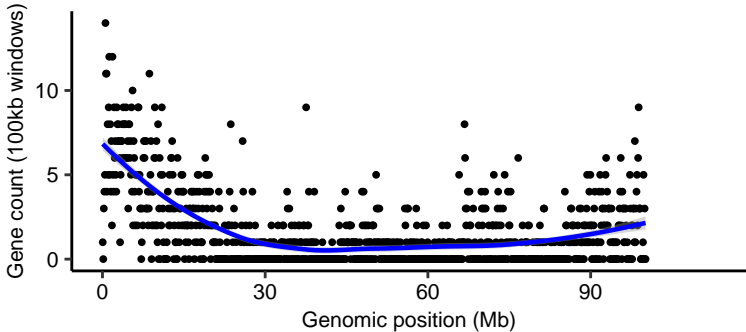

*Gossypium hirsutum* chromosome A04

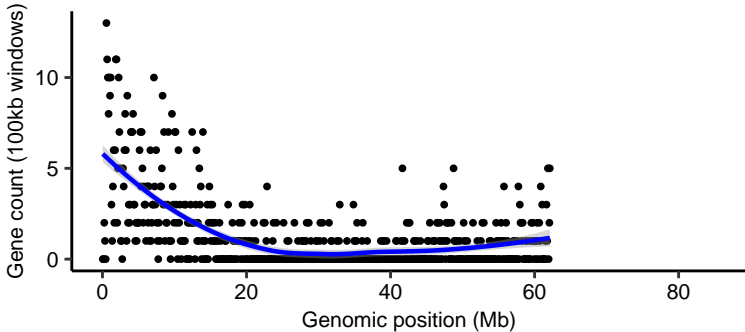

*Gossypium hirsutum* chromosome A05

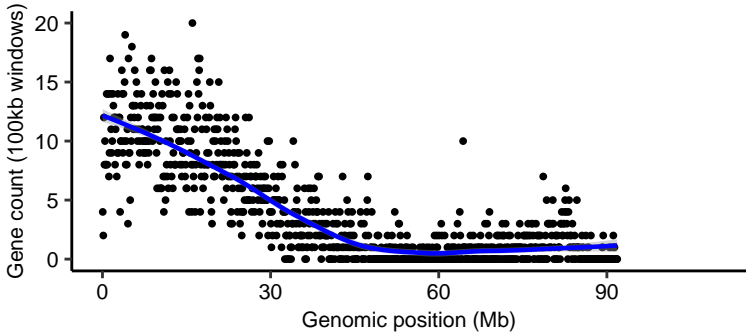

# *Gossypium hirsutum* chromosome A06

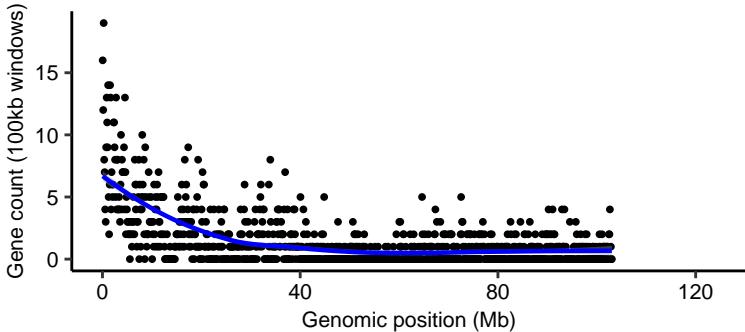

*Gossypium hirsutum* chromosome A07

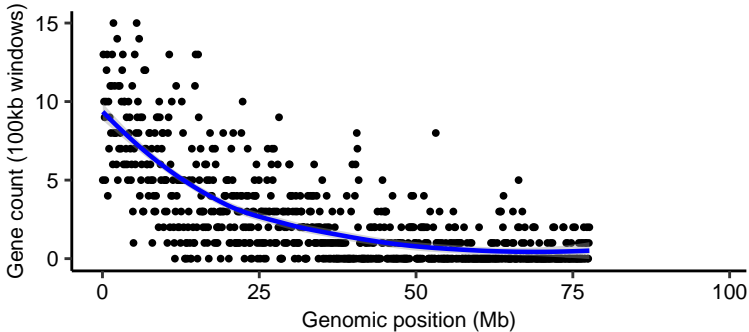

*Gossypium hirsutum* chromosome A08

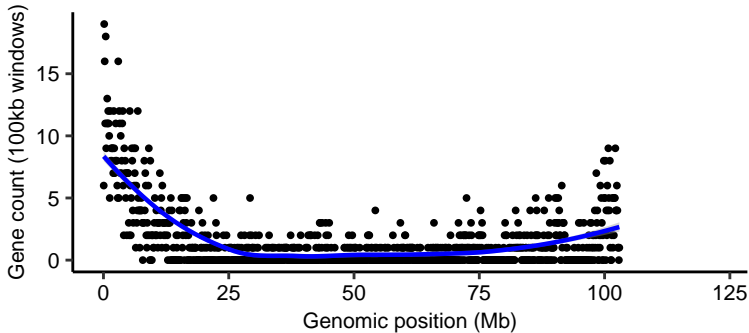

*Gossypium hirsutum* chromosome A09

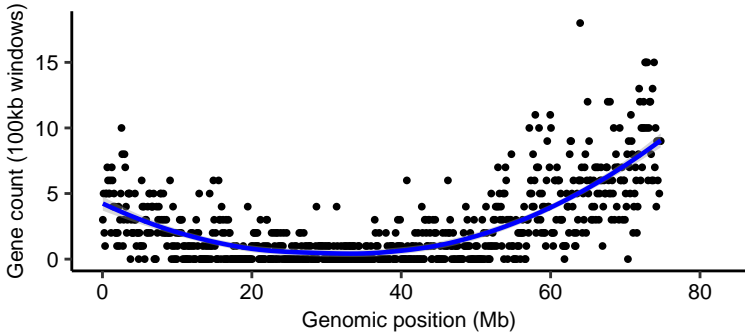

*Gossypium hirsutum* chromosome A10

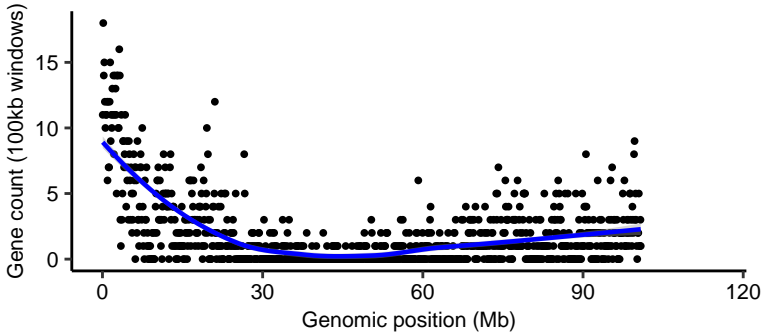



*Gossypium hirsutum* chromosome A11

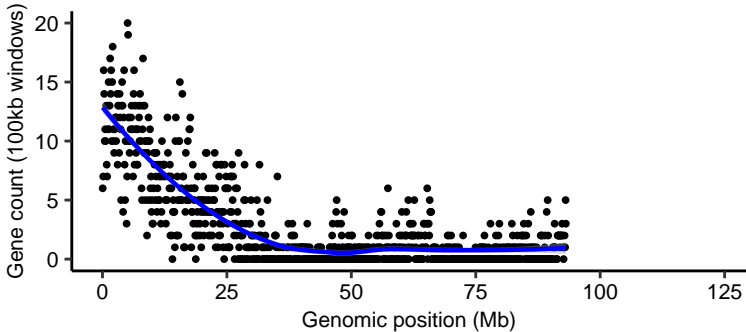

*Gossypium hirsutum* chromosome A12

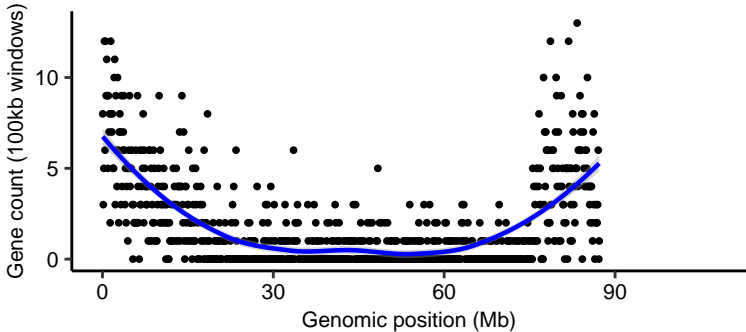

*Gossypium hirsutum* chromosome A13

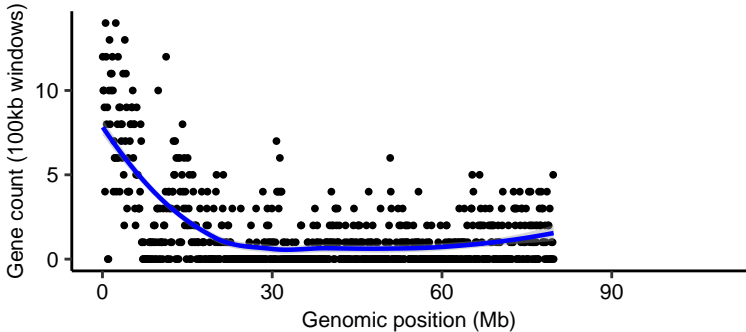

*Gossypium hirsutum* chromosome D01

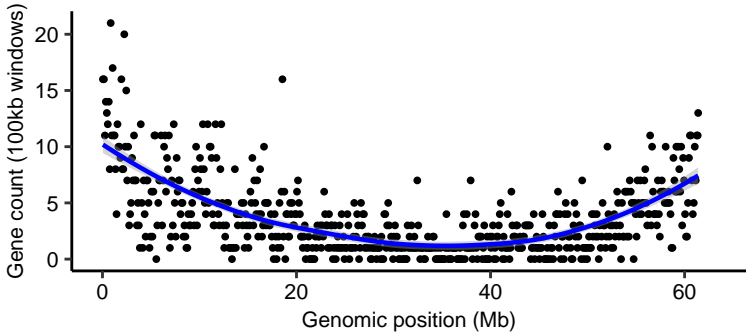

*Gossypium hirsutum* chromosome D02

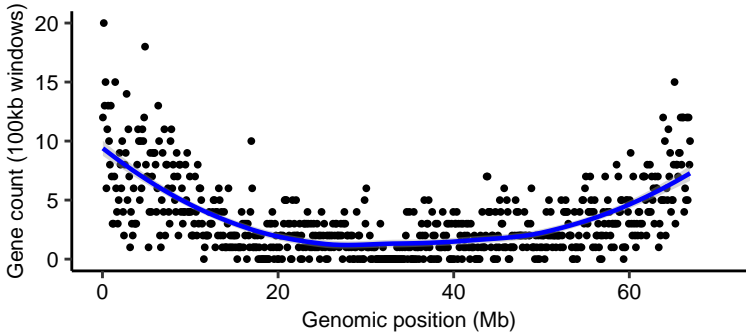

*Gossypium hirsutum* chromosome D03

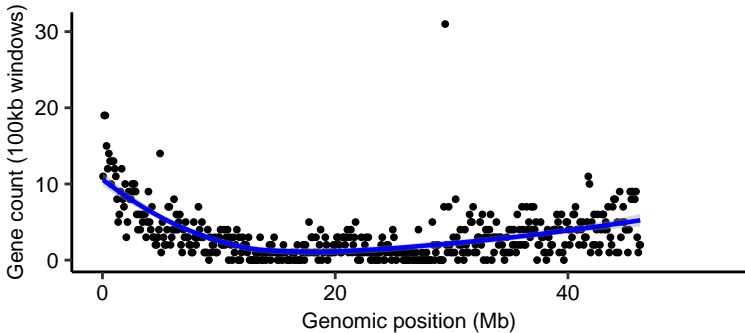

*Gossypium hirsutum* chromosome D04

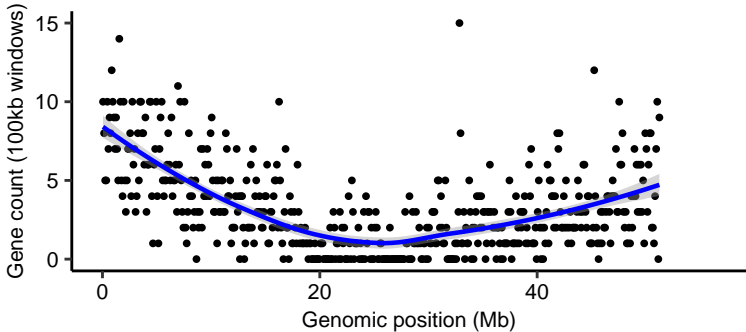

*Gossypium hirsutum* chromosome D05

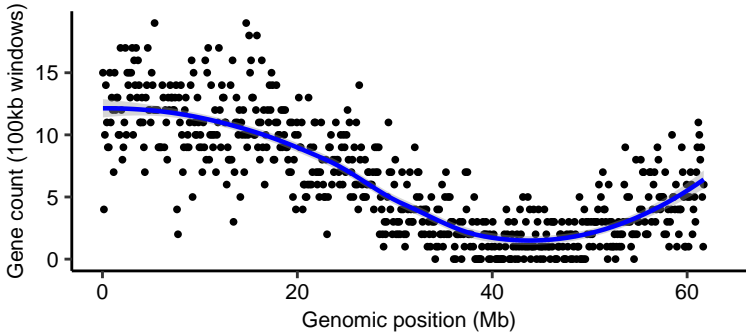



*Gossypium hirsutum* chromosome D06

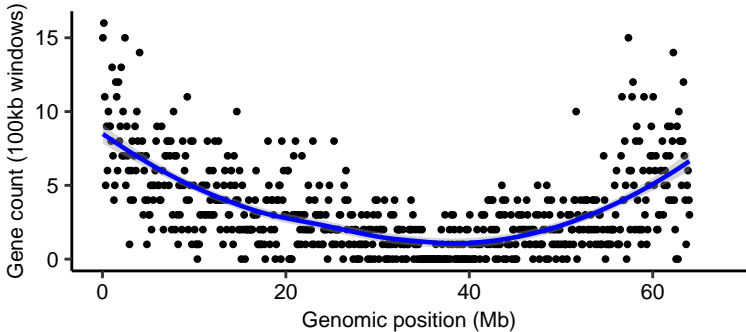

*Gossypium hirsutum* chromosome D07

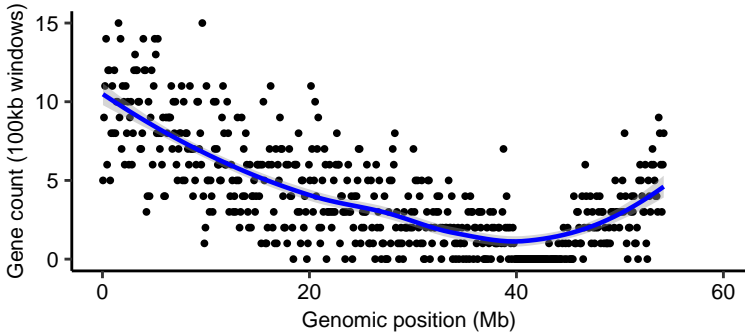

*Gossypium hirsutum* chromosome D08

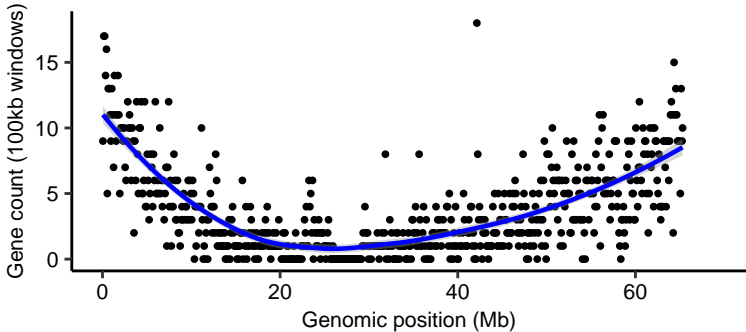

*Gossypium hirsutum* chromosome D09

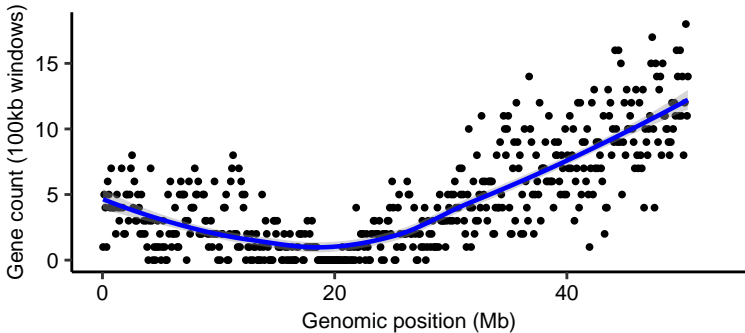

*Gossypium hirsutum* chromosome D10

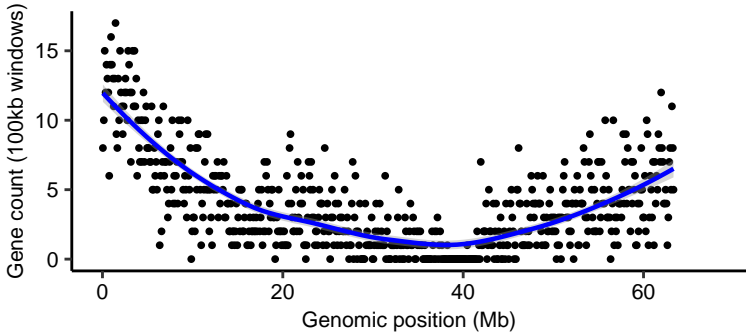

*Gossypium hirsutum* chromosome D11

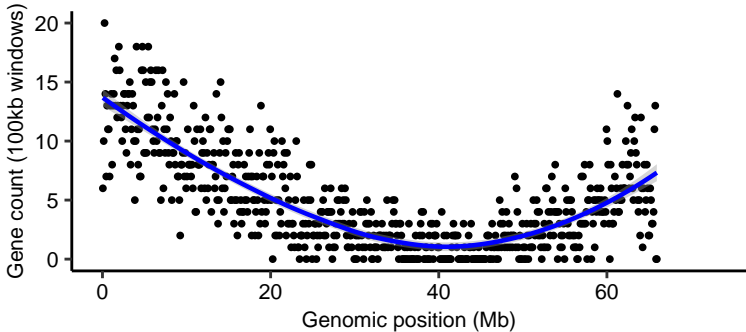

*Gossypium hirsutum* chromosome D12

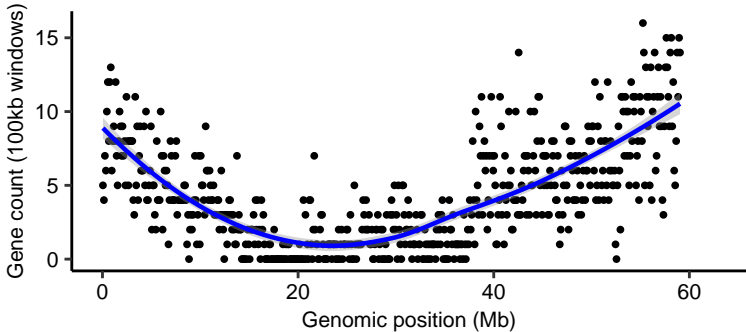

# *Gossypium hirsutum* chromosome D13

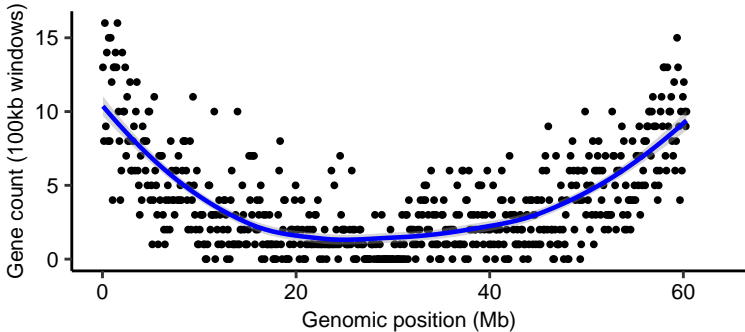



*Gossypium raimondii* chromosome 1

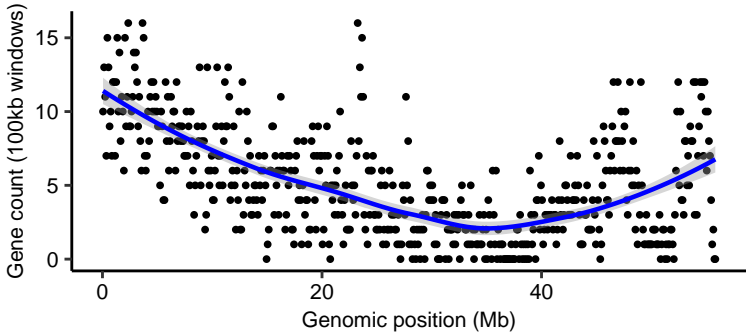

*Gossypium raimondii* chromosome 10

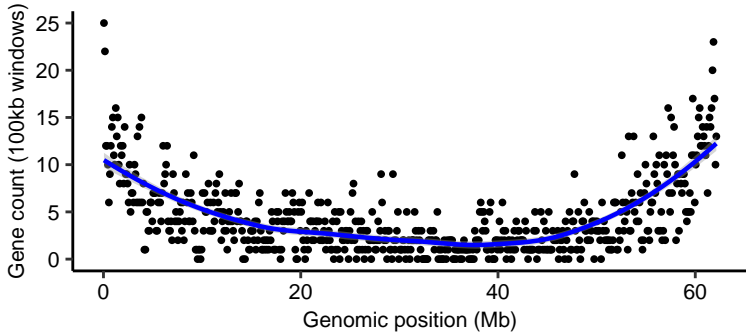

*Gossypium raimondii* chromosome 11

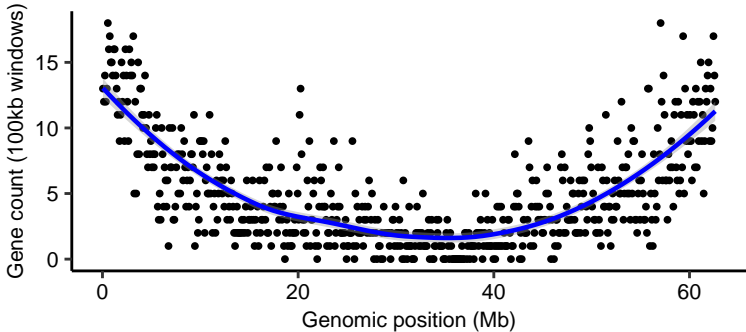

*Gossypium raimondii* chromosome 12

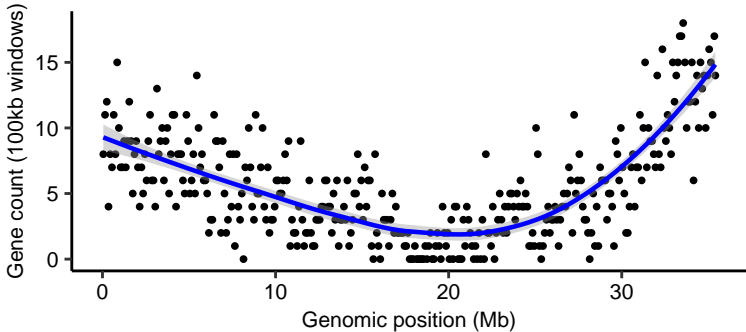

*Gossypium raimondii* chromosome 13

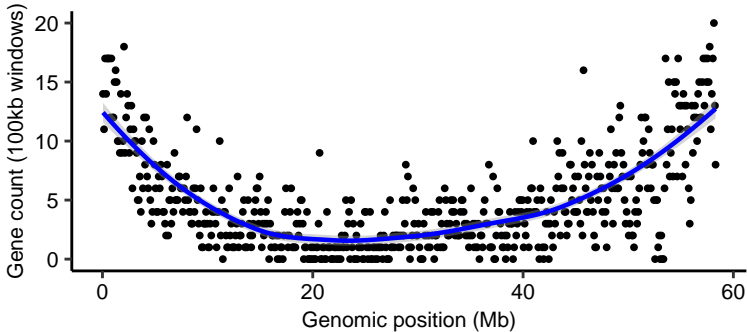

*Gossypium raimondii* chromosome 2

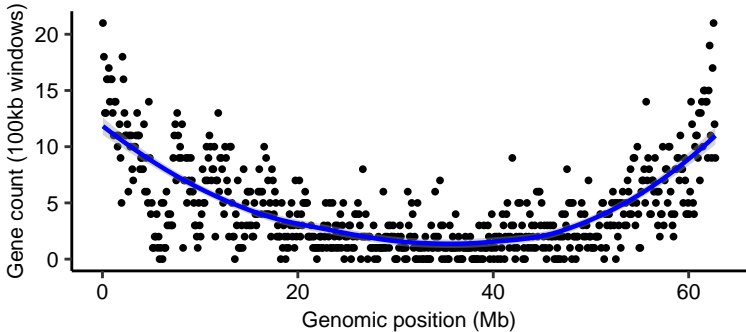

*Gossypium raimondii* chromosome 3

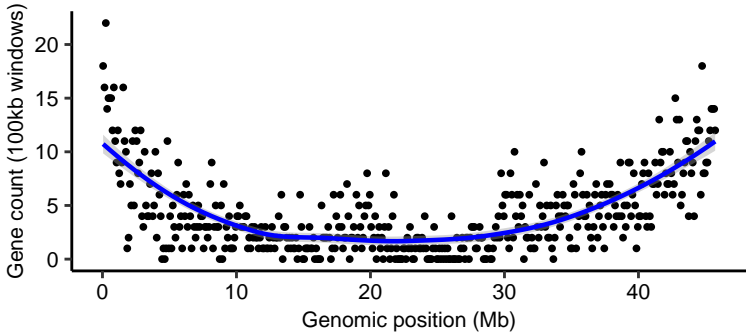

*Gossypium raimondii* chromosome 4

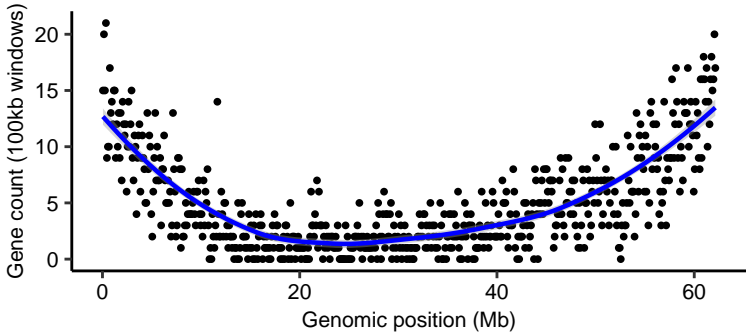



*Gossypium raimondii* chromosome 5

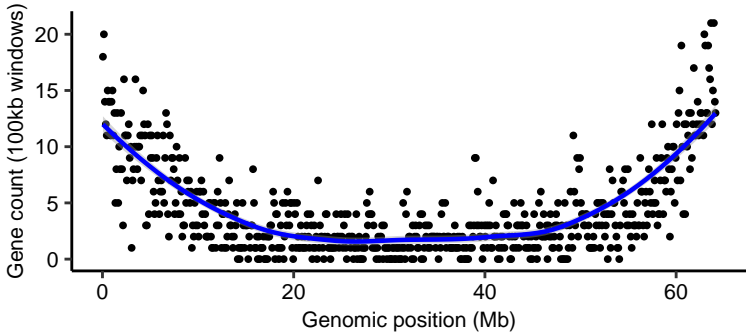

*Gossypium raimondii* chromosome 6

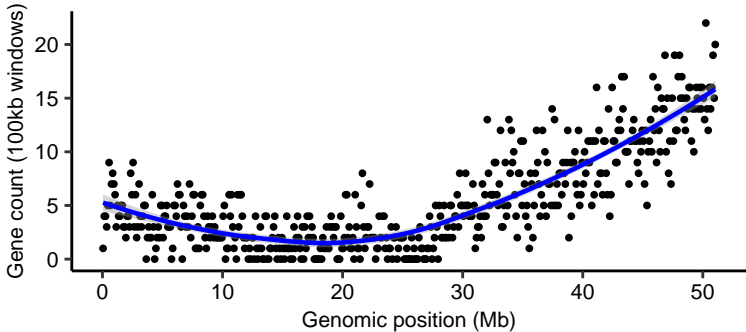

*Gossypium raimondii* chromosome 7

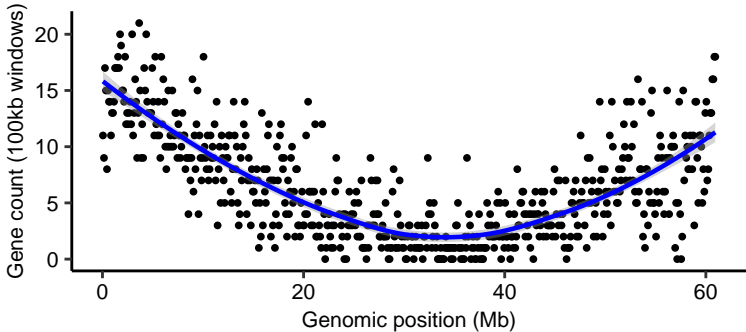

*Gossypium raimondii* chromosome 8

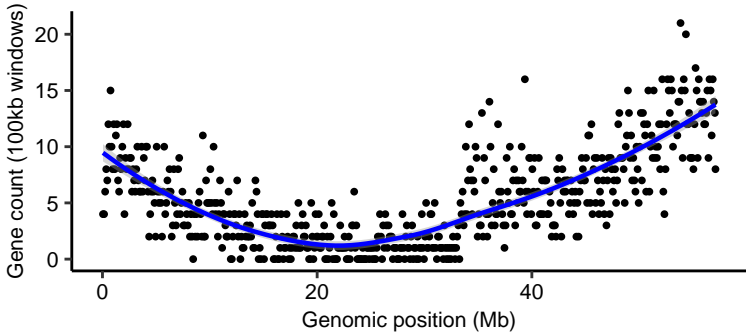

*Gossypium raimondii* chromosome 9

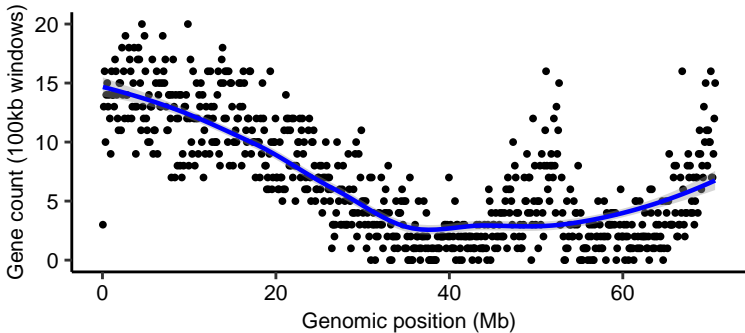

*Helianthus annuus* chromosome 1

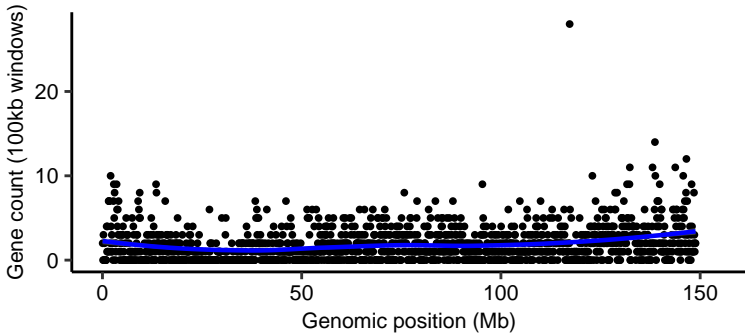

*Helianthus annuus* chromosome 10

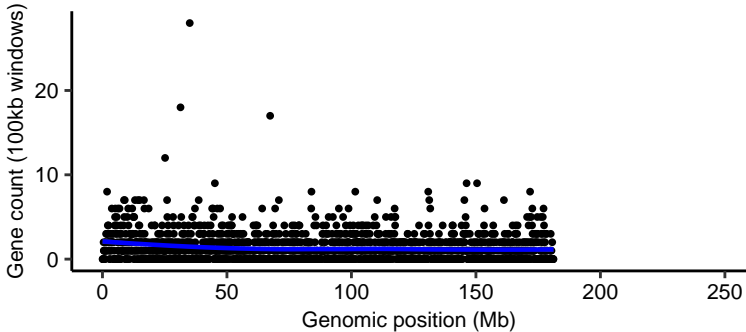

*Helianthus annuus* chromosome 12

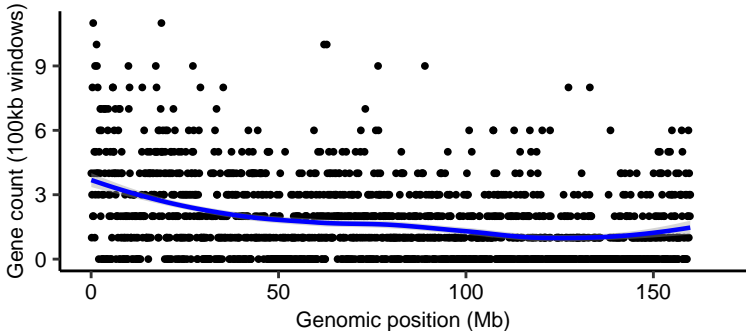



*Helianthus annuus* chromosome 13

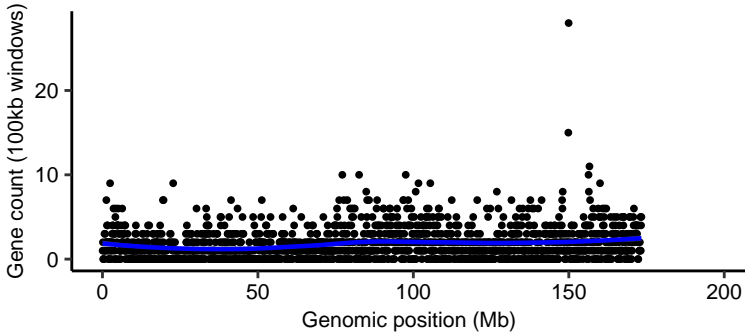

*Helianthus annuus* chromosome 14

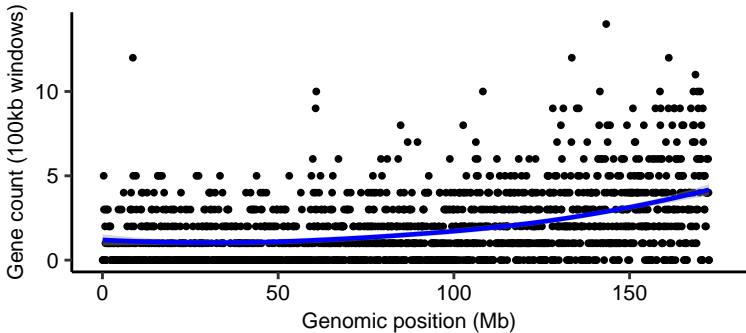

*Helianthus annuus* chromosome 2

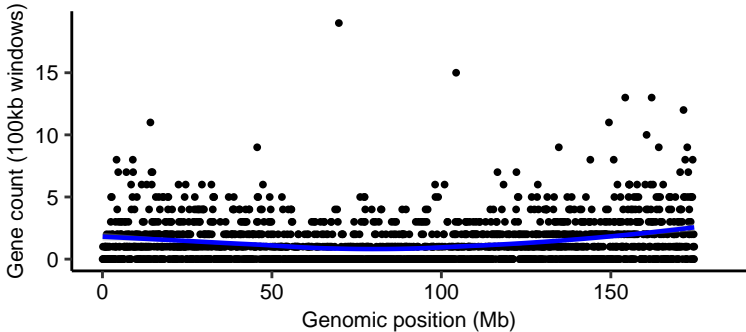

### *Helianthus annuus* chromosome 3

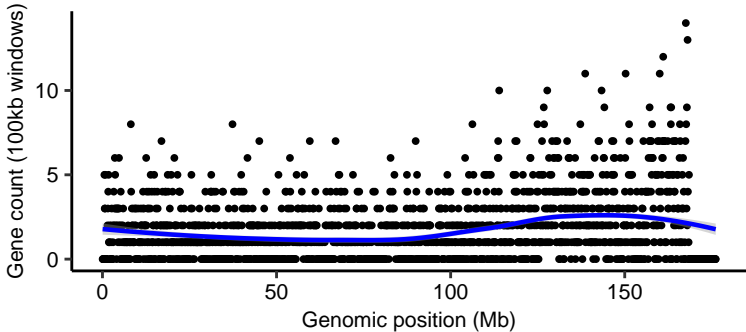

# *Helianthus annuus* chromosome 9

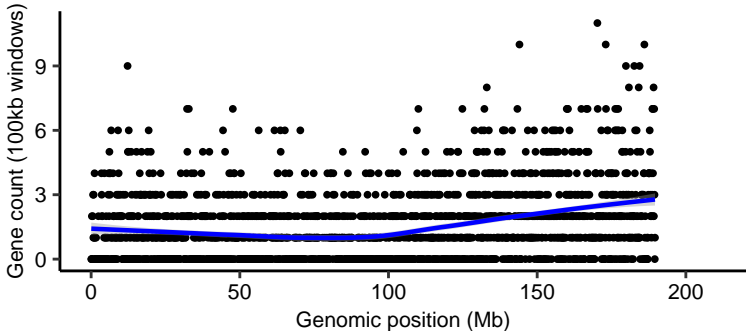

*Hordeum vulgare* chromosome 1H

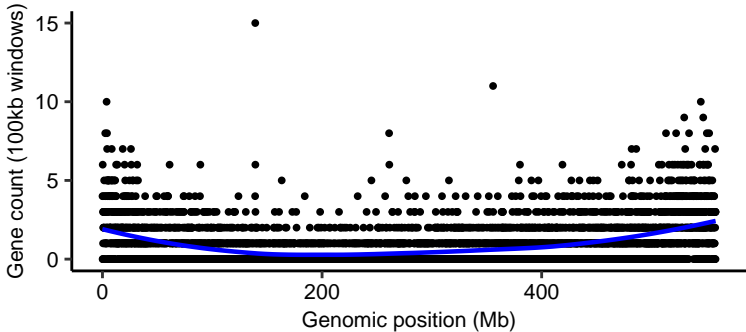

*Hordeum vulgare* chromosome 2H

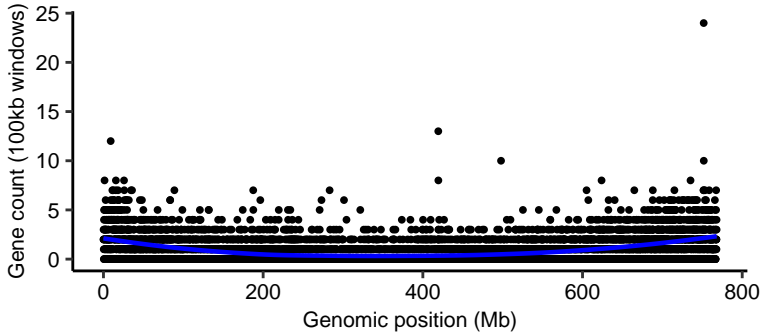

*Hordeum vulgare* chromosome 3H

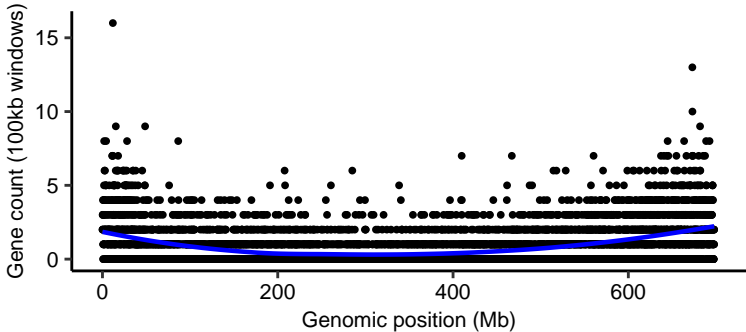



*Hordeum vulgare* chromosome 4H

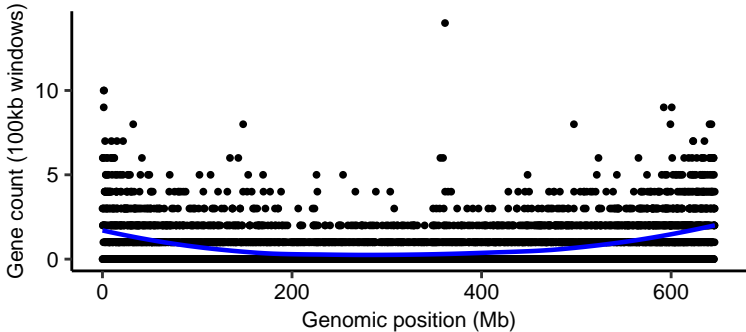

*Hordeum vulgare* chromosome 5H

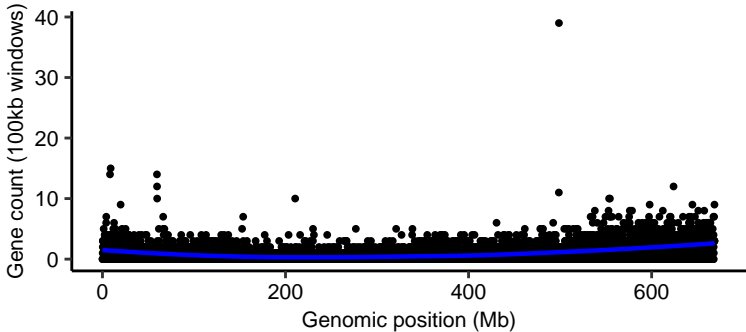

*Hordeum vulgare* chromosome 6H

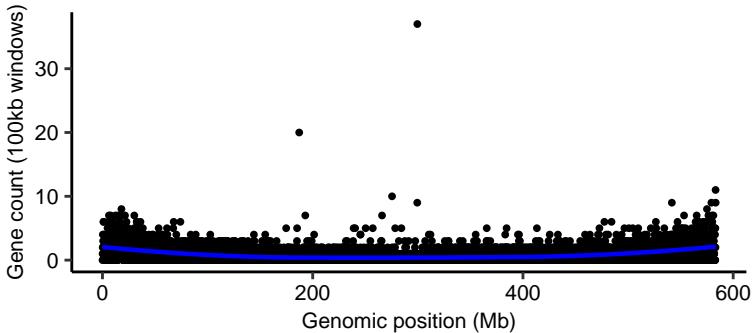

*Hordeum vulgare* chromosome 7H

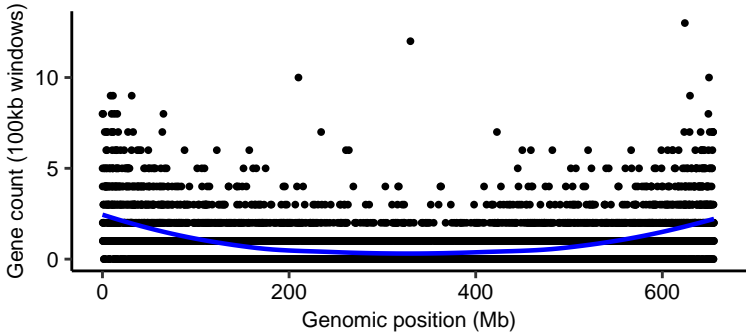

*Lupinus albus* chromosome 1

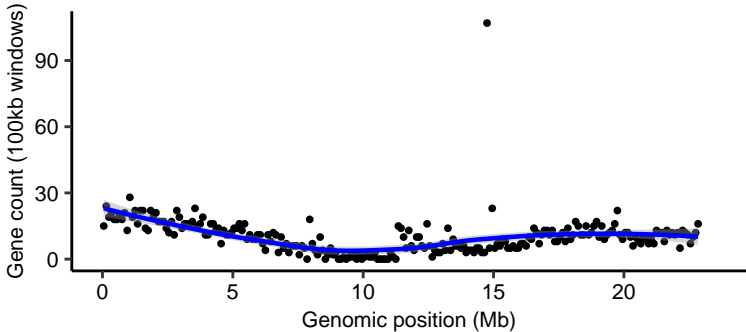

*Lupinus albus* chromosome 10

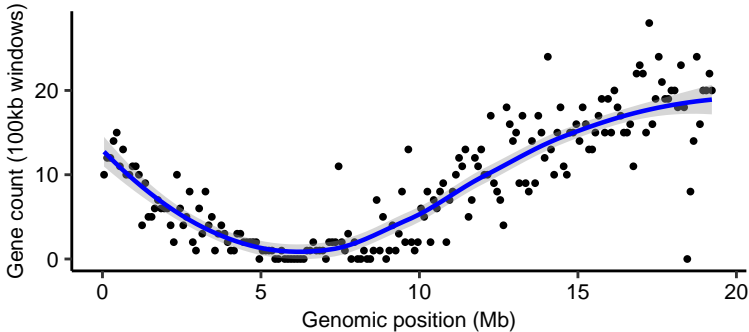

*Lupinus albus* chromosome 11

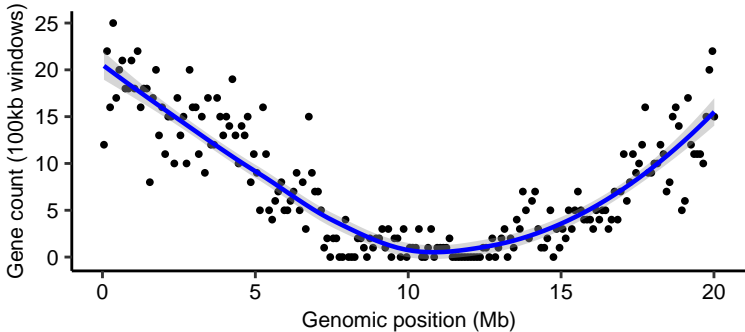

*Lupinus albus* chromosome 12

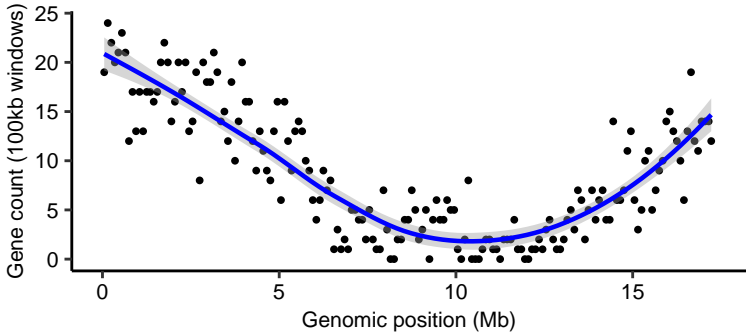



*Lupinus albus* chromosome 13

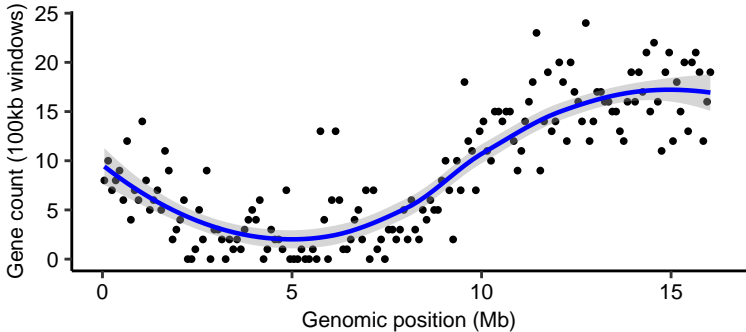

*Lupinus albus* chromosome 14

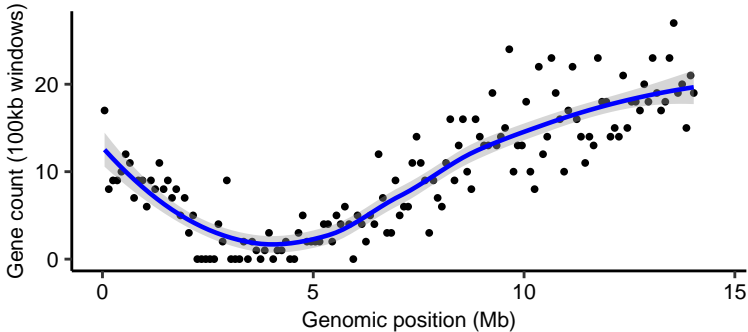

*Lupinus albus* chromosome 15

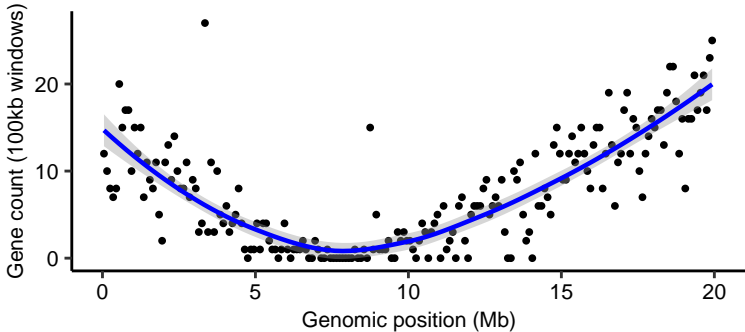

*Lupinus albus* chromosome 16

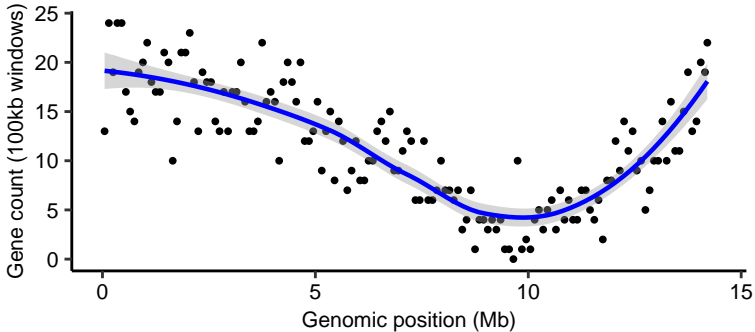

*Lupinus albus* chromosome 17

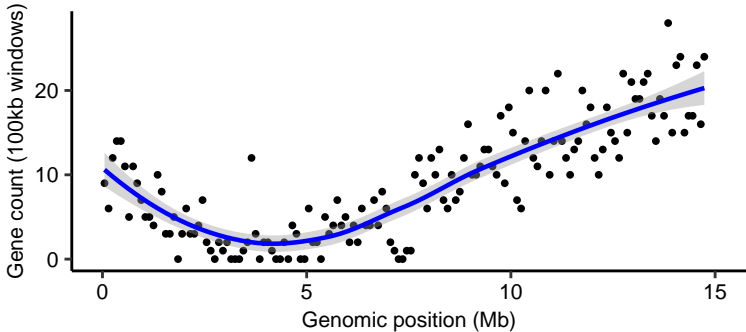

*Lupinus albus* chromosome 18

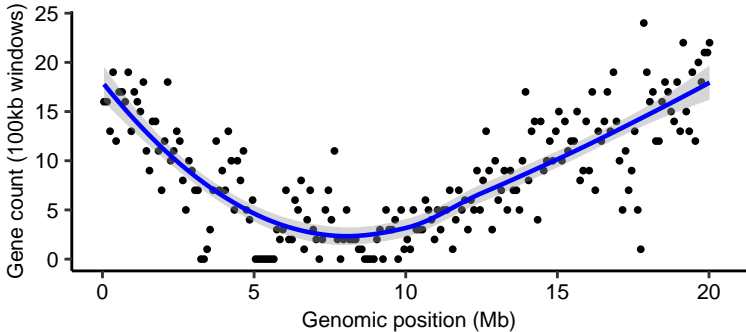

*Lupinus albus* chromosome 19

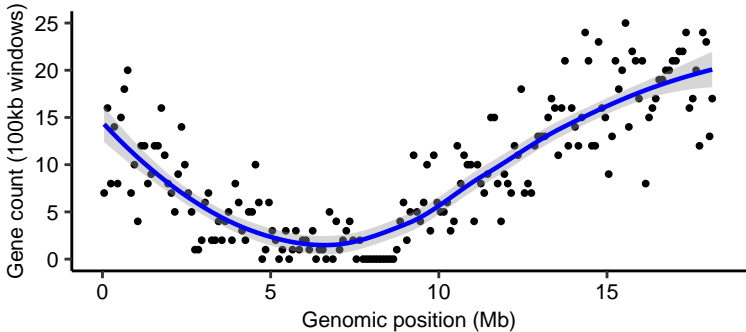

*Lupinus albus* chromosome 2

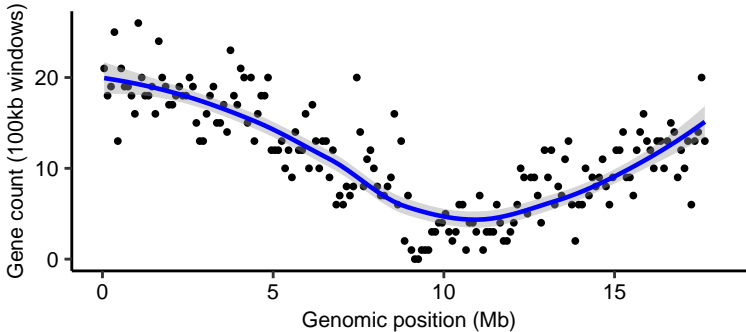



*Lupinus albus* chromosome 20

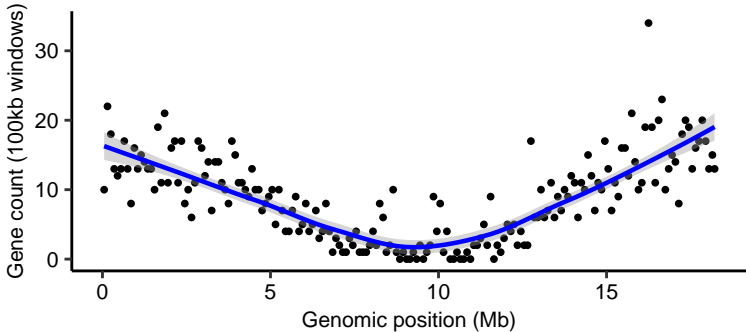

*Lupinus albus* chromosome 21

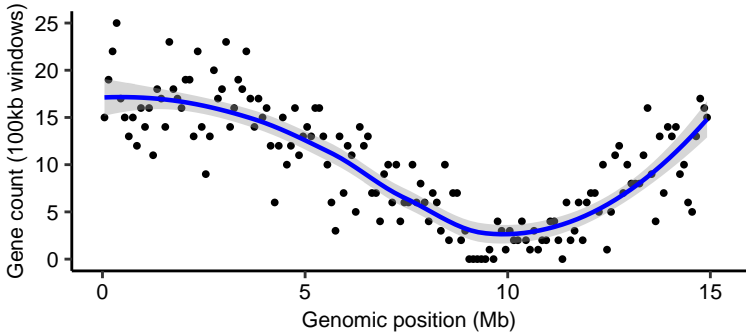

*Lupinus albus* chromosome 22

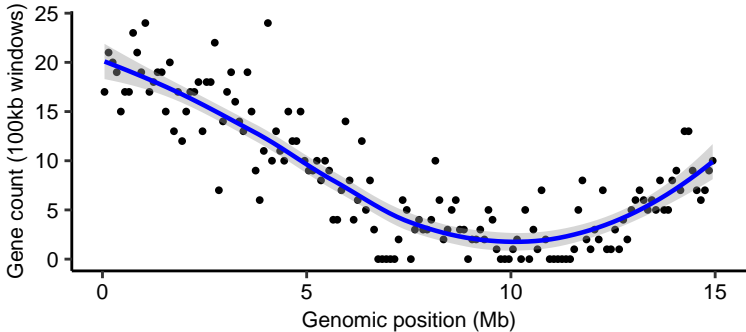

*Lupinus albus* chromosome 23

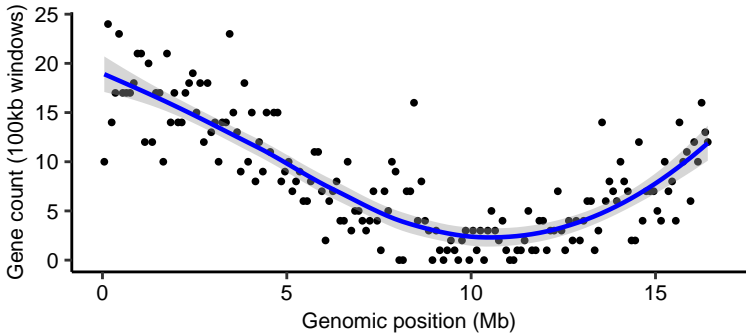

*Lupinus albus* chromosome 24

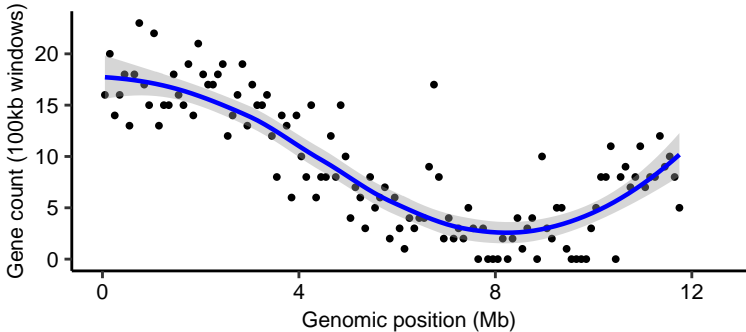

*Lupinus albus* chromosome 25

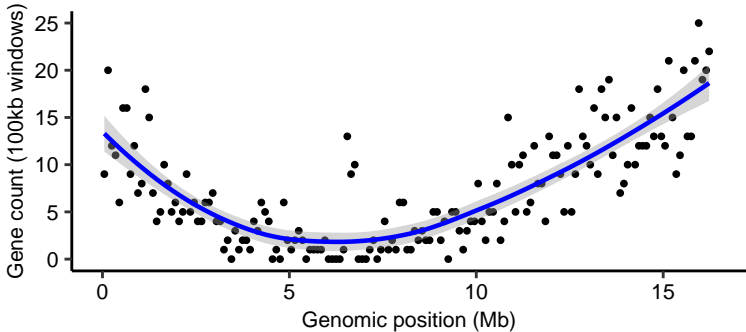

*Lupinus albus* chromosome 3

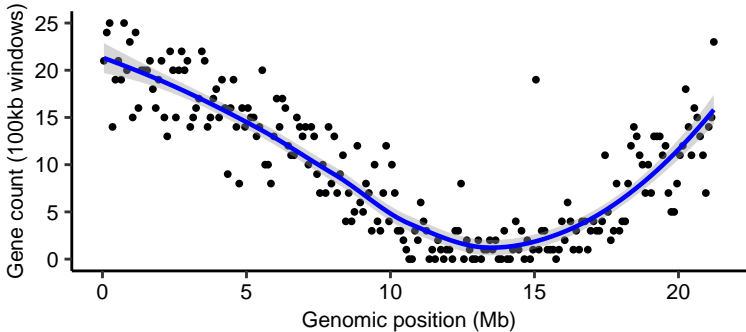

*Lupinus albus* chromosome 4

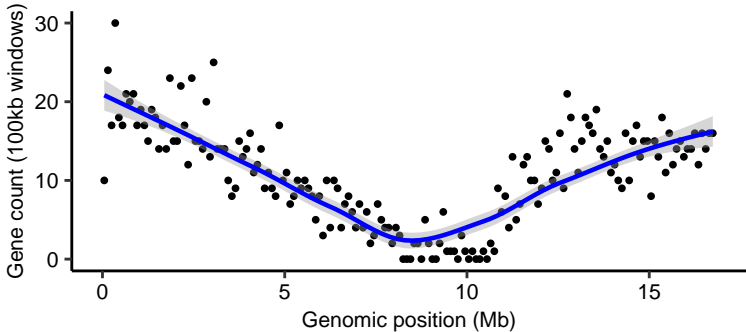



*Lupinus albus* chromosome 5

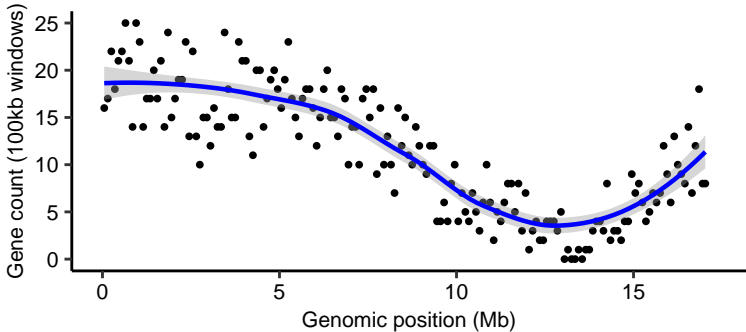

*Lupinus albus* chromosome 6

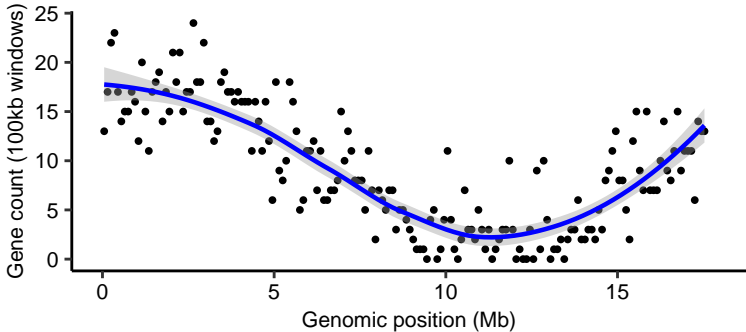

*Lupinus albus* chromosome 7

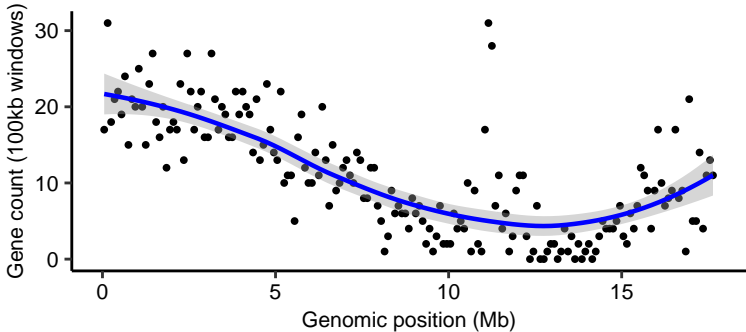

*Lupinus albus* chromosome 8

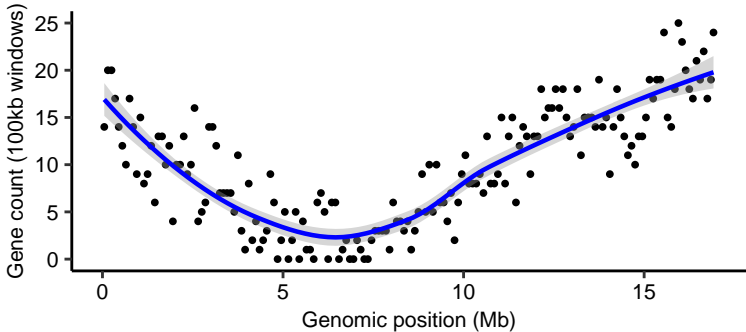

*Lupinus albus* chromosome 9

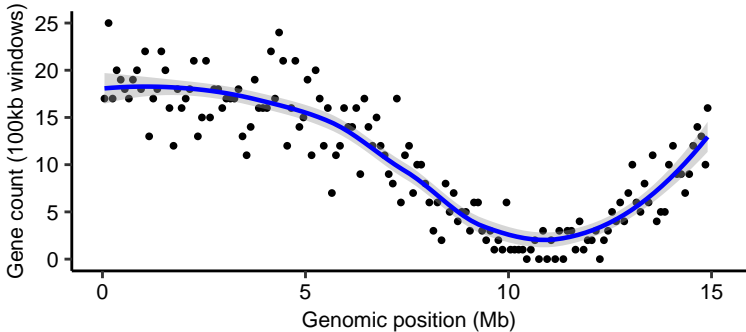

*Malus domestica* chromosome 1

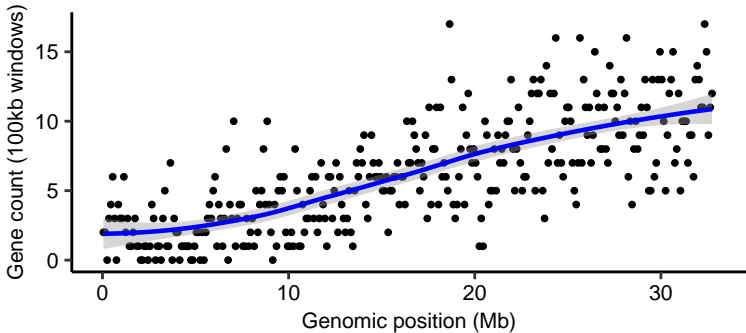

*Malus domestica* chromosome 10

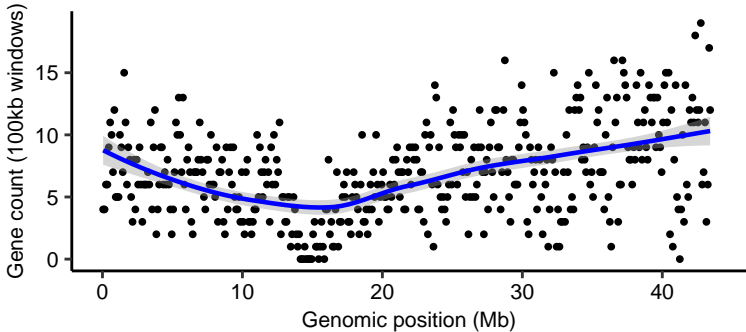

*Malus domestica* chromosome 11

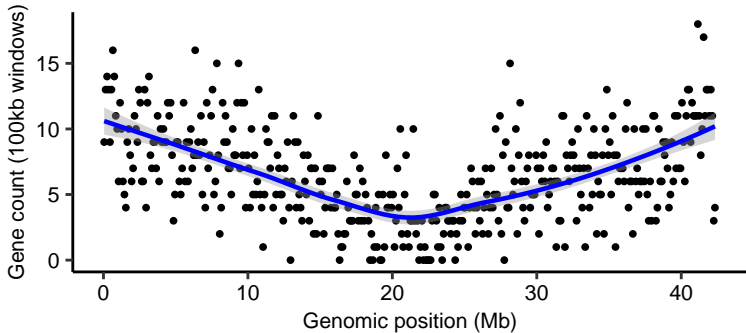



*Malus domestica* chromosome 12

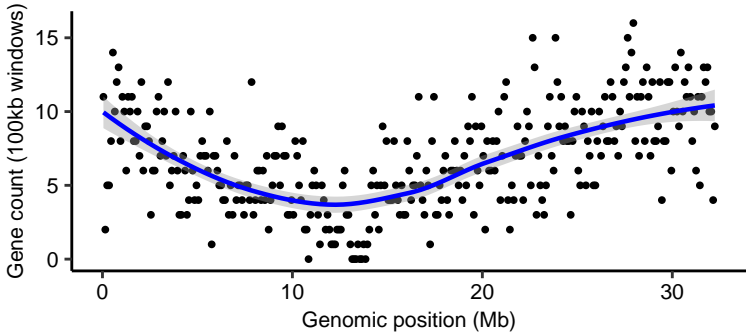

*Malus domestica* chromosome 13

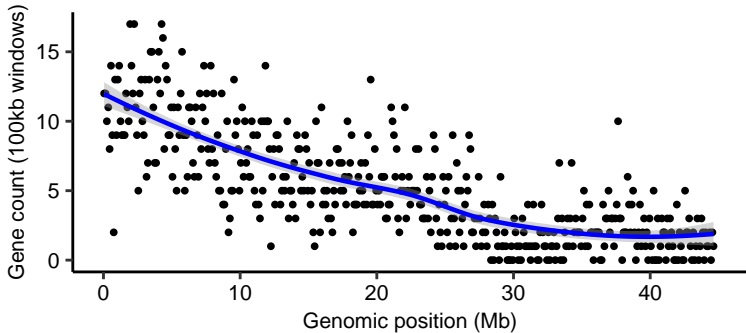

*Malus domestica* chromosome 14

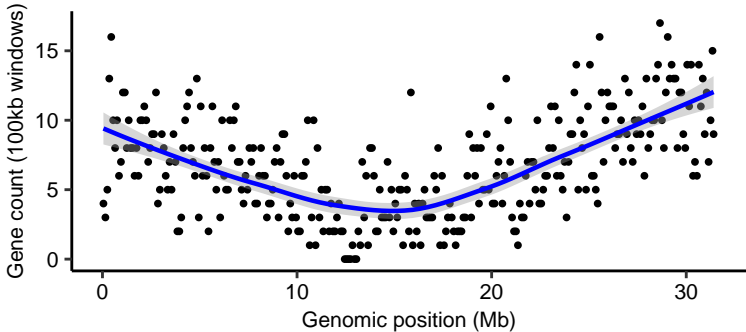

*Malus domestica* chromosome 15

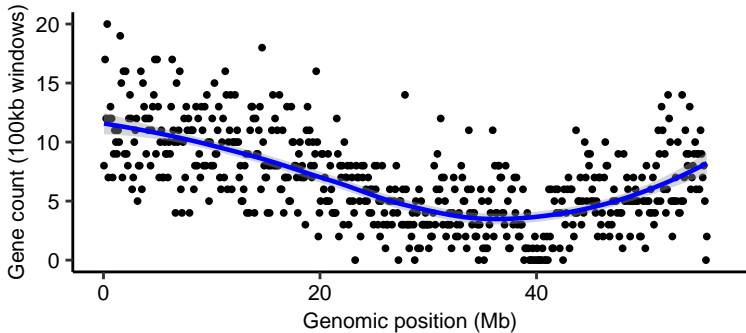

*Malus domestica* chromosome 16

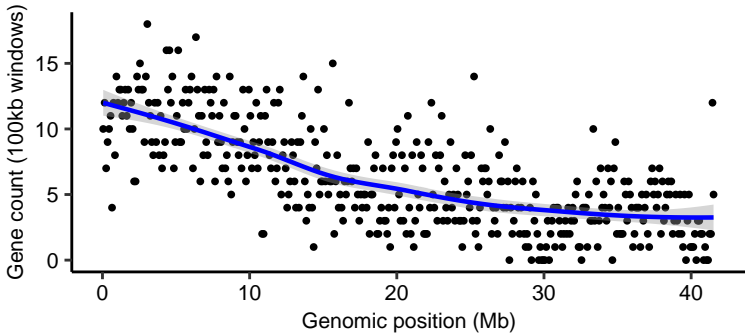

*Malus domestica* chromosome 17

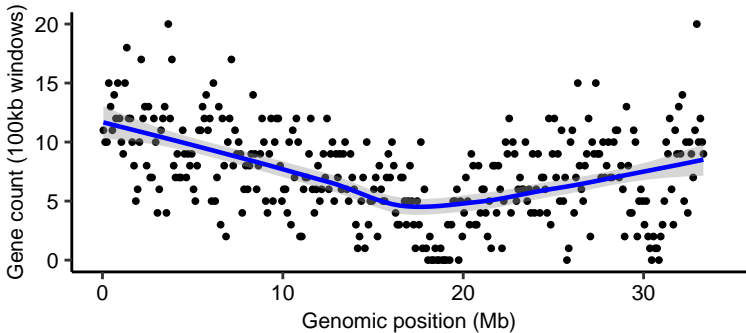

*Malus domestica* chromosome 2

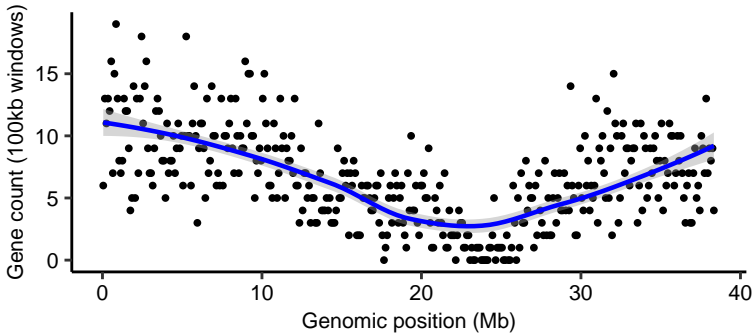

*Malus domestica* chromosome 3

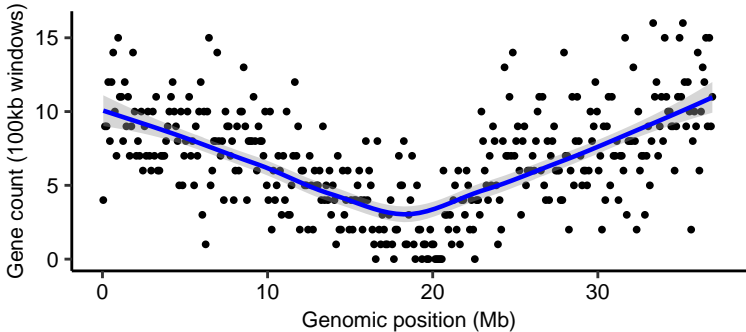



*Malus domestica* chromosome 4

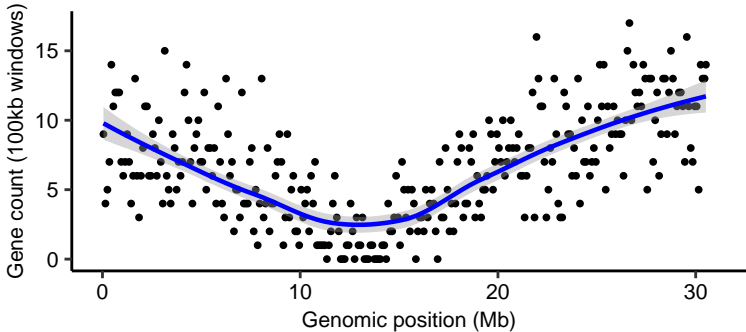

*Malus domestica* chromosome 5

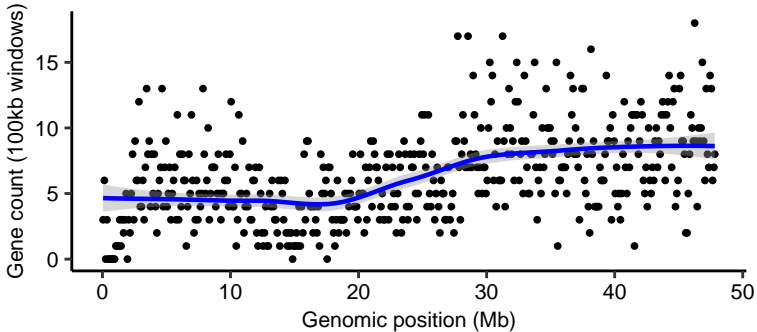

*Malus domestica* chromosome 6

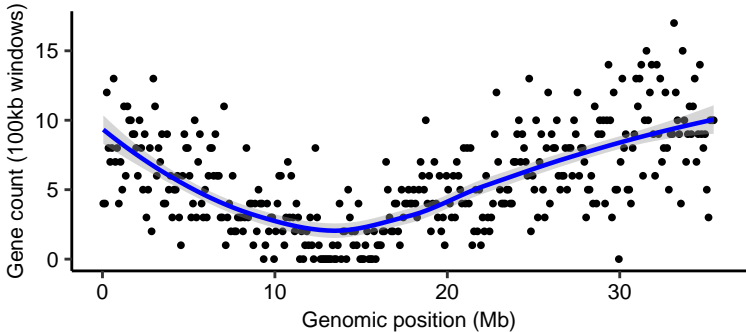

*Malus domestica* chromosome 7

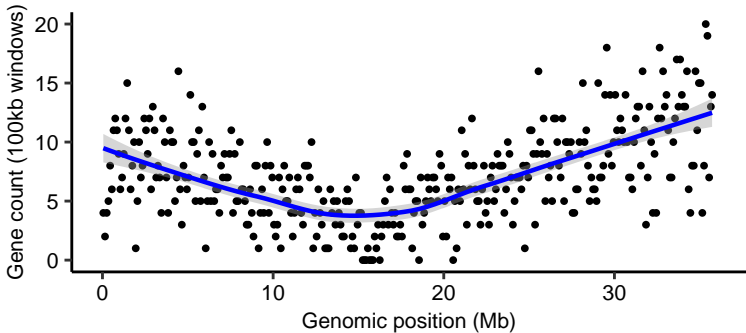

*Malus domestica* chromosome 8

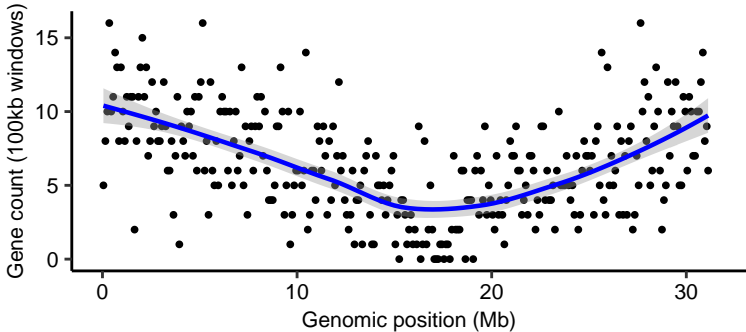

*Malus domestica* chromosome 9

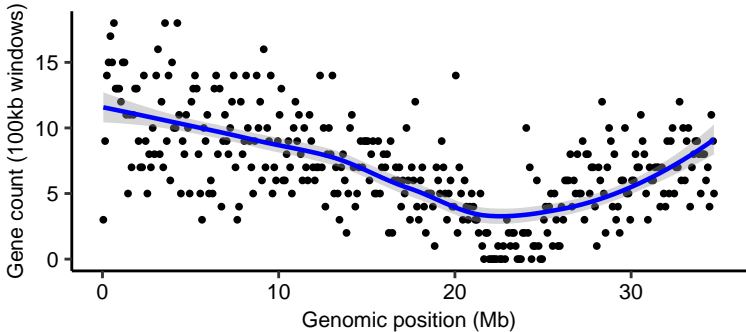

*Manihot esculenta* chromosome 1

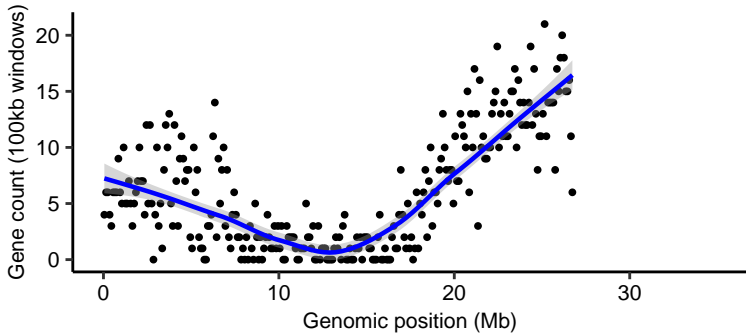

*Manihot esculenta* chromosome 10

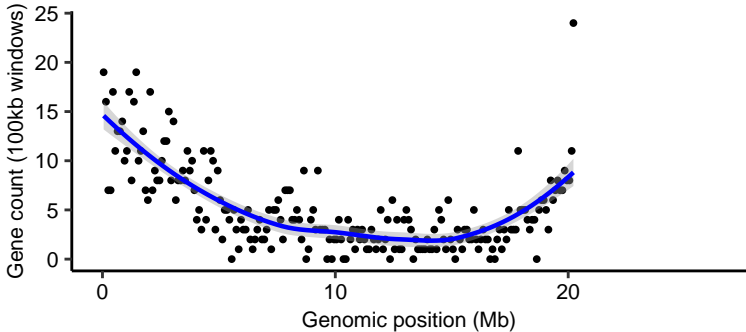



*Manihot esculenta* chromosome 11

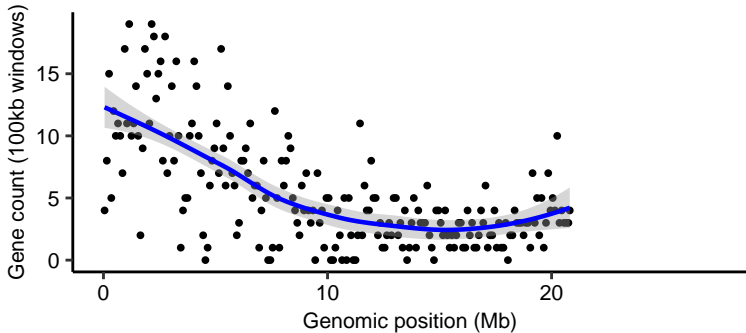

*Manihot esculenta* chromosome 12

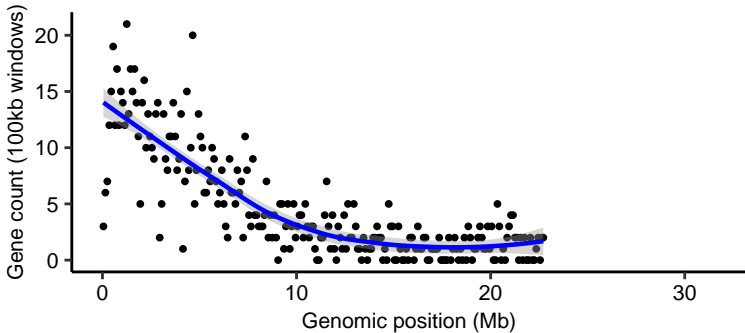

*Manihot esculenta* chromosome 13

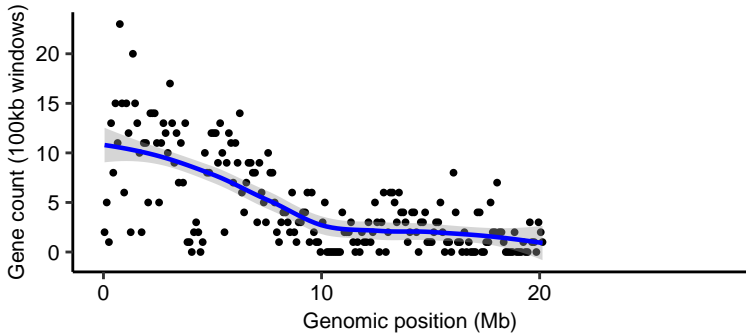

*Manihot esculenta* chromosome 14

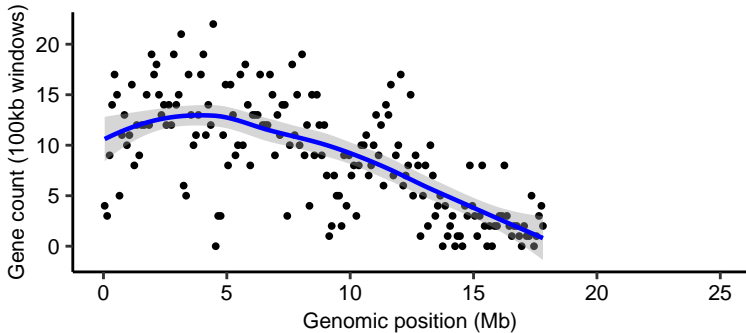

*Manihot esculenta* chromosome 15

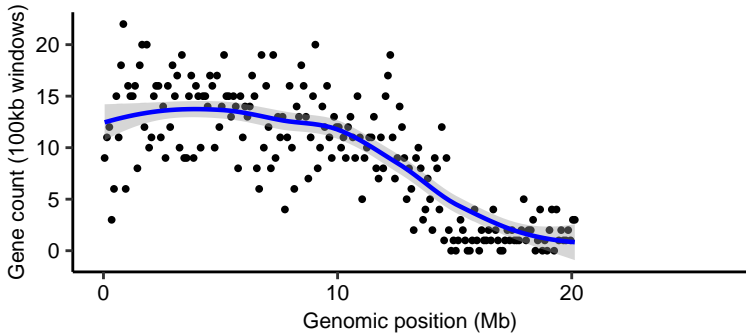

*Manihot esculenta* chromosome 16

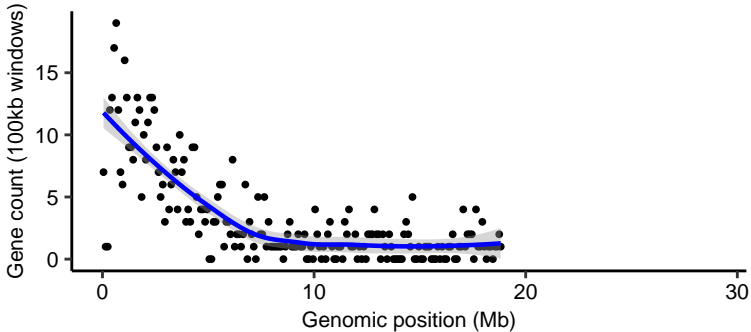

*Manihot esculenta* chromosome 17

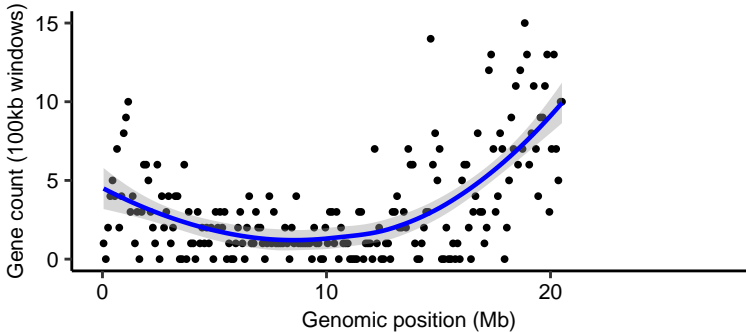

*Manihot esculenta* chromosome 18

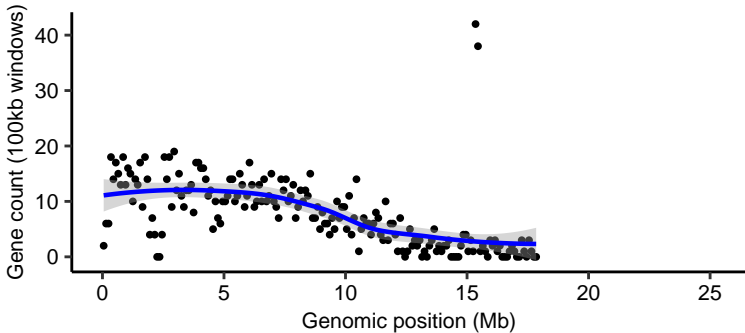



*Manihot esculenta* chromosome 2

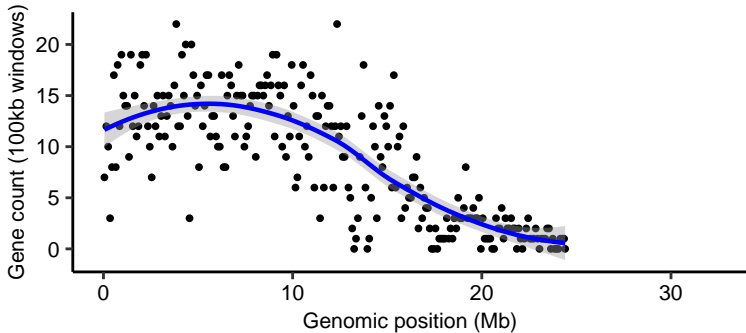

*Manihot esculenta* chromosome 3

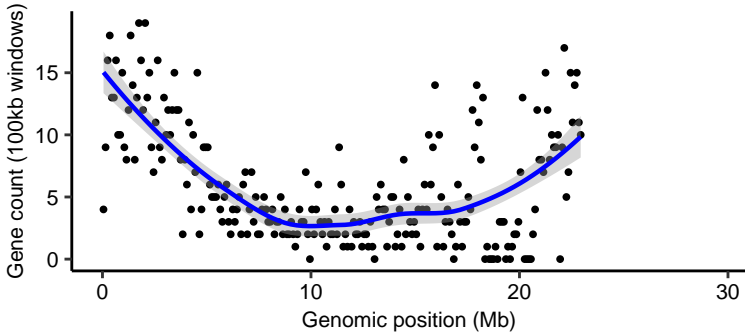

*Manihot esculenta* chromosome 4

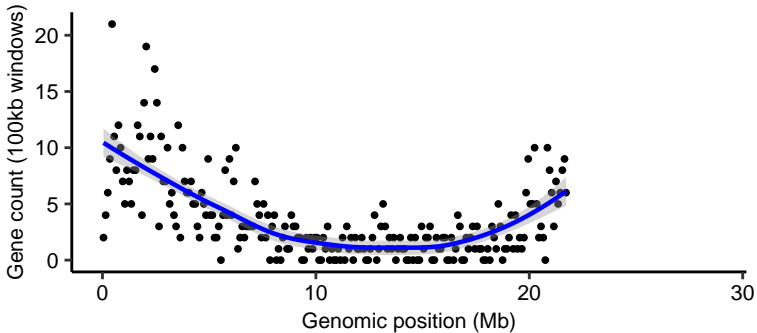

*Manihot esculenta* chromosome 5

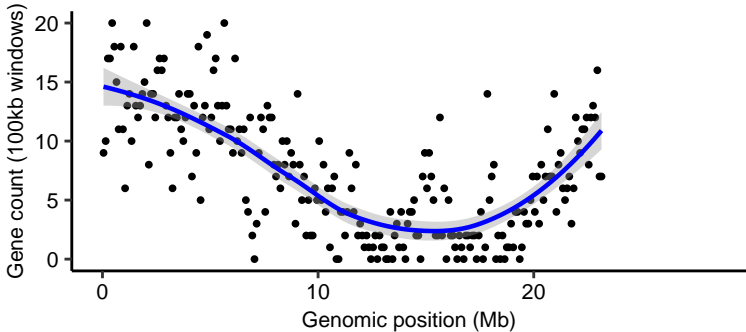

*Manihot esculenta* chromosome 6

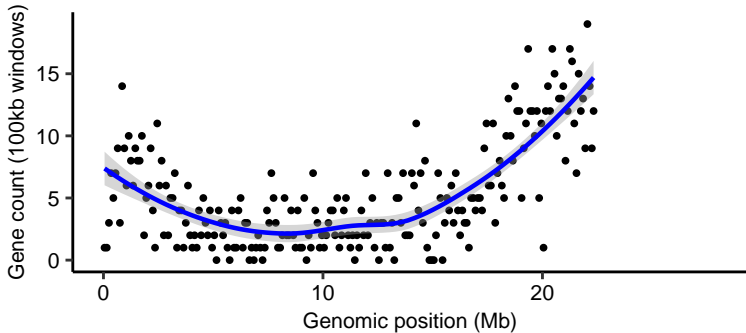

*Manihot esculenta* chromosome 7

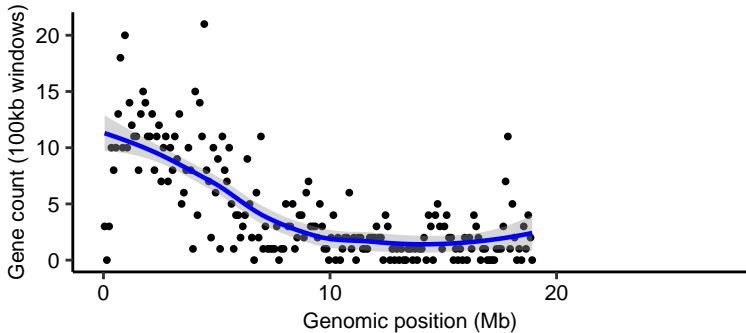

*Manihot esculenta* chromosome 8

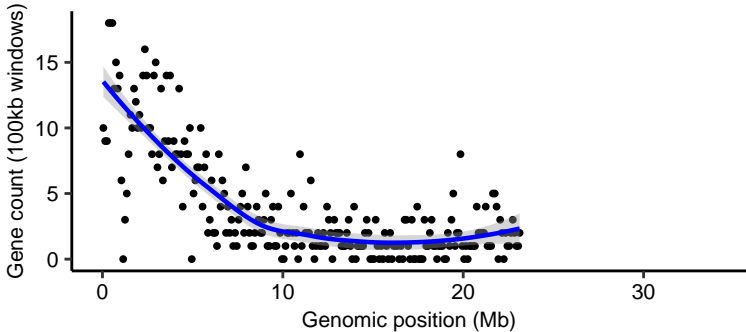

*Manihot esculenta* chromosome 9

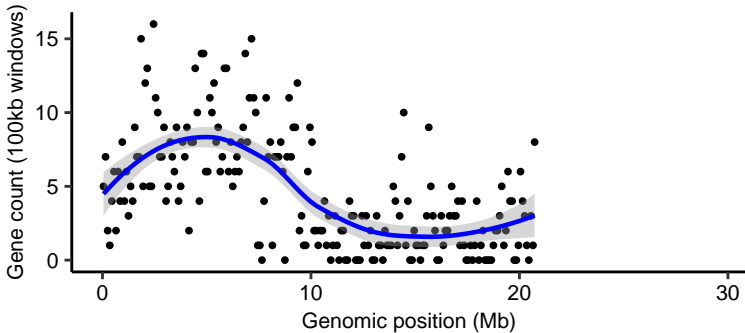



*Oryza nivara* chromosome 1

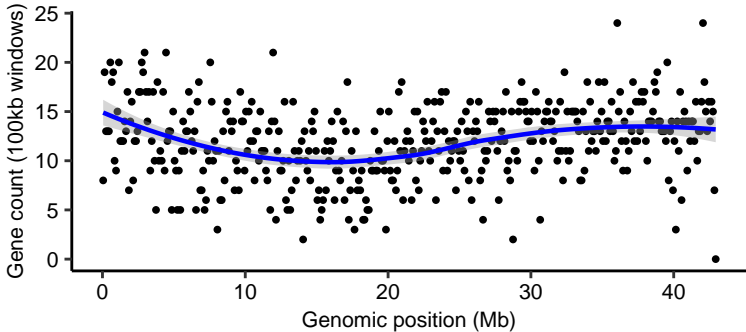

*Oryza nivara* chromosome 10

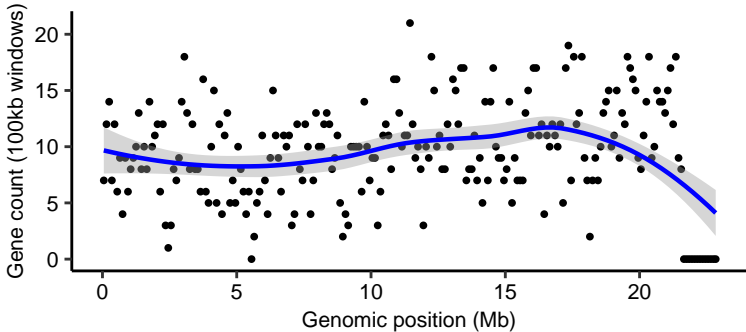

*Oryza nivara* chromosome 2

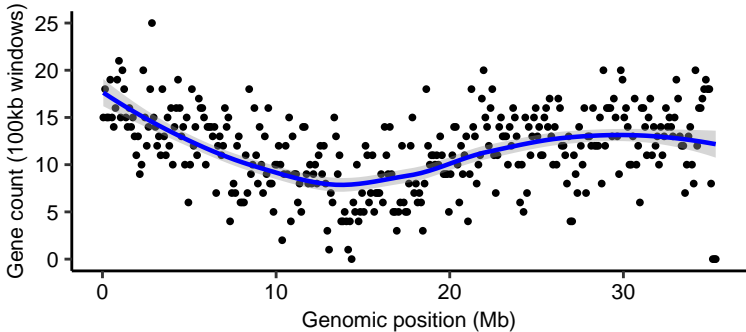

*Oryza nivara* chromosome 3

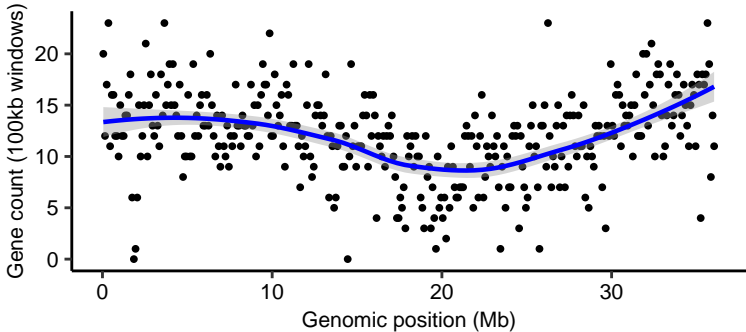

*Oryza nivara* chromosome 5

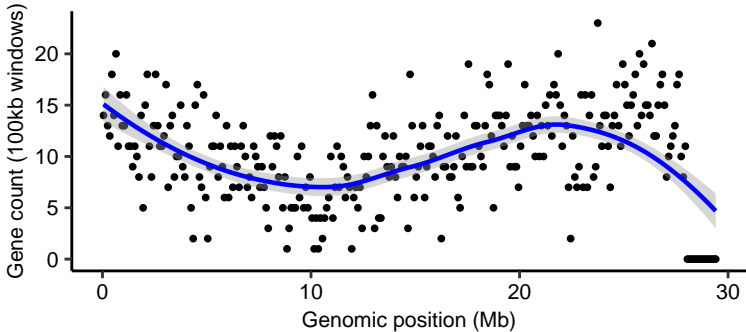

*Oryza nivara* chromosome 6

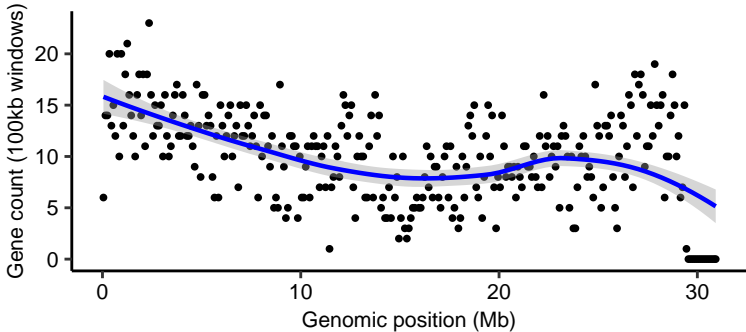

*Oryza nivara* chromosome 8

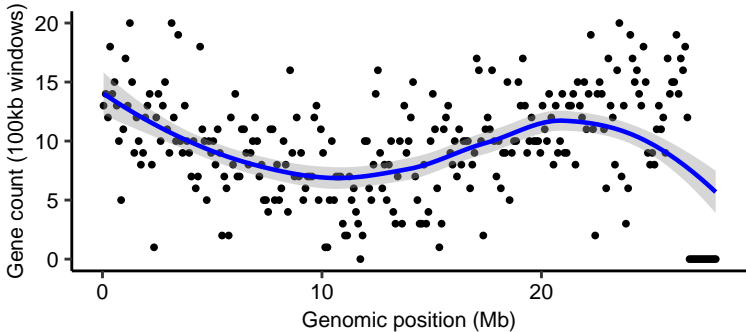

*Oryza sativa* chromosome 1

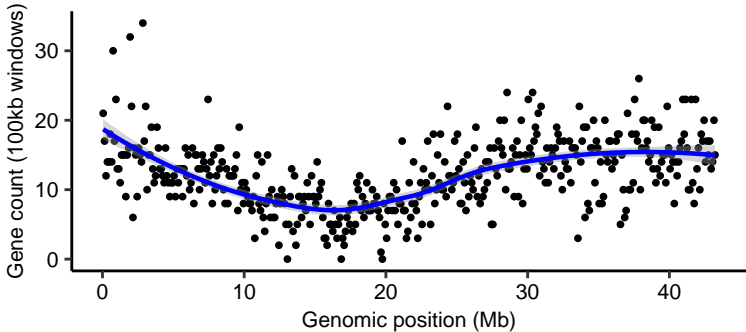



*Oryza sativa* chromosome 10

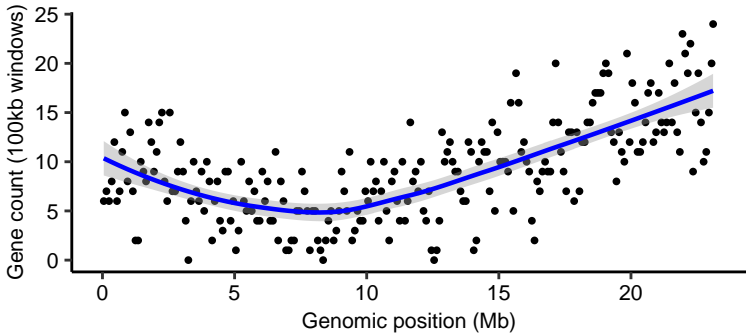

*Oryza sativa* chromosome 11

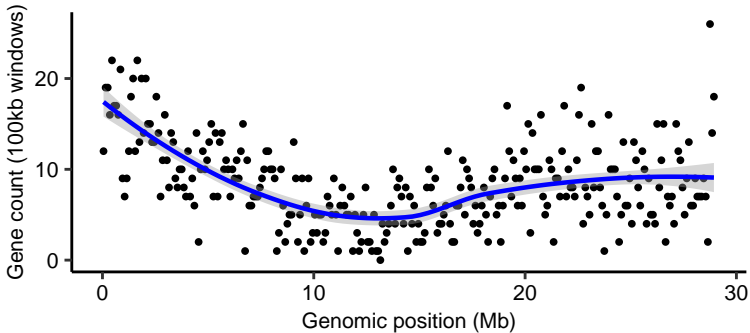

*Oryza sativa* chromosome 12

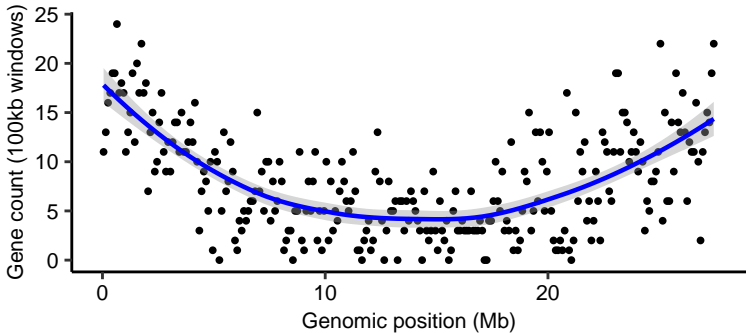

*Oryza sativa* chromosome 2

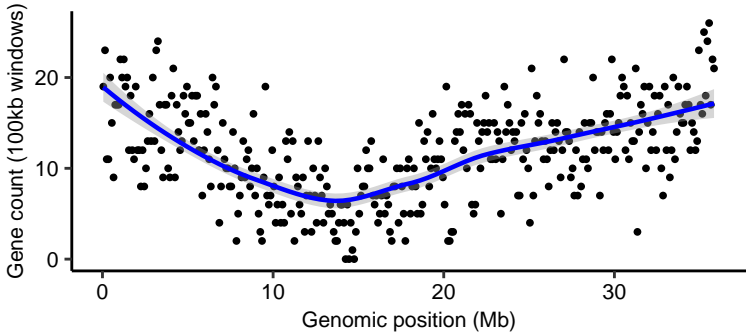

*Oryza sativa* chromosome 3

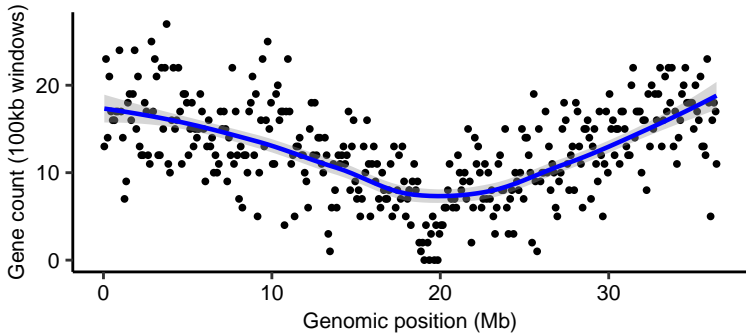

*Oryza sativa* chromosome 4

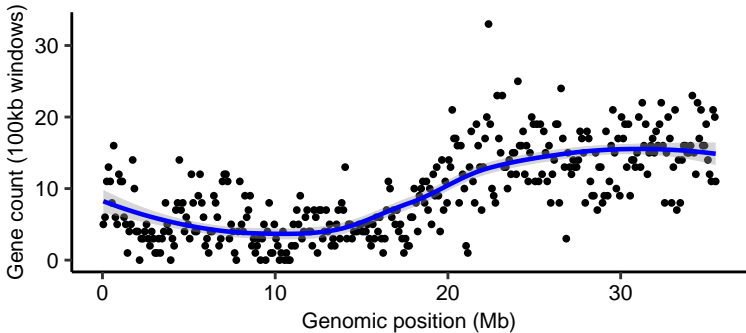

*Oryza sativa* chromosome 5

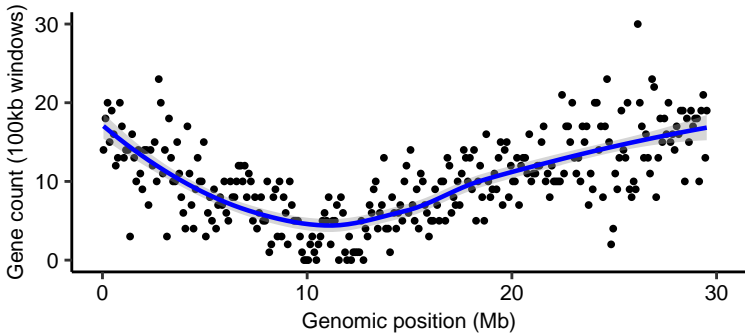

*Oryza sativa* chromosome 6

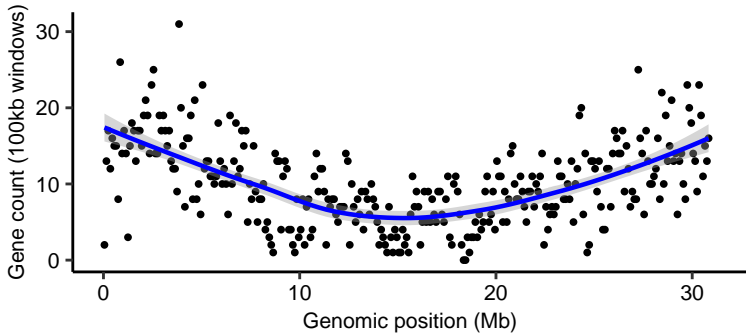



*Oryza sativa* chromosome 7

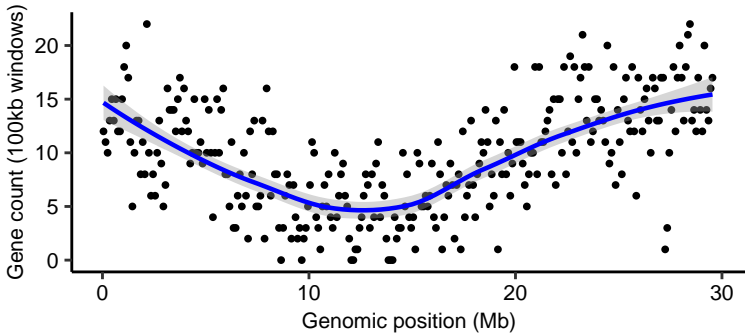

# *Oryza sativa* chromosome 8

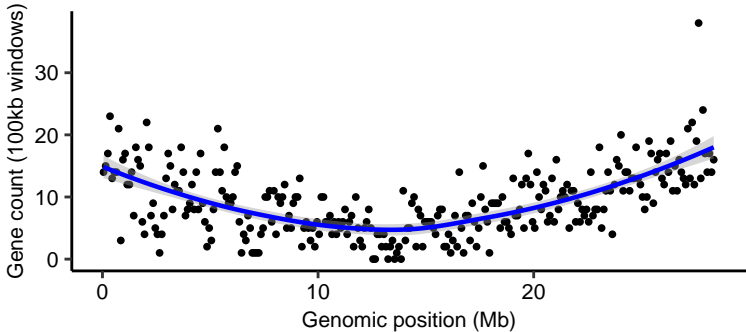

# *Oryza sativa* chromosome 9

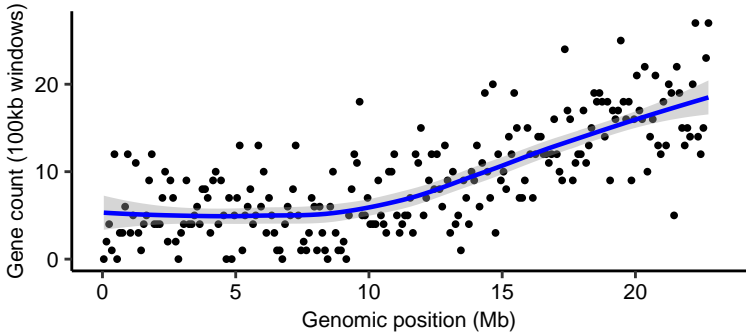

*Panicum hallii* chromosome 1

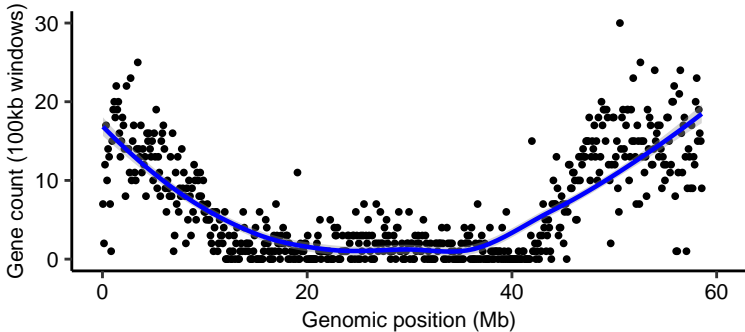

*Panicum hallii* chromosome 2

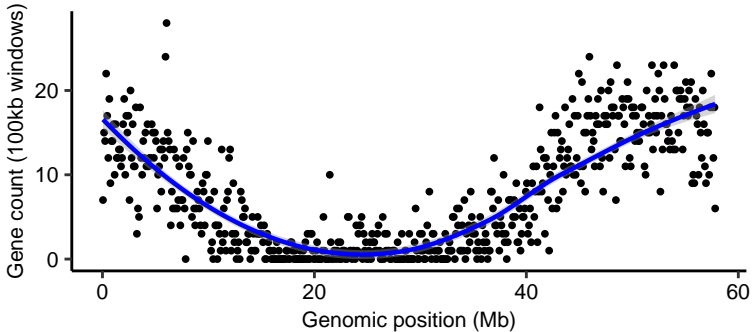

*Panicum hallii* chromosome 3

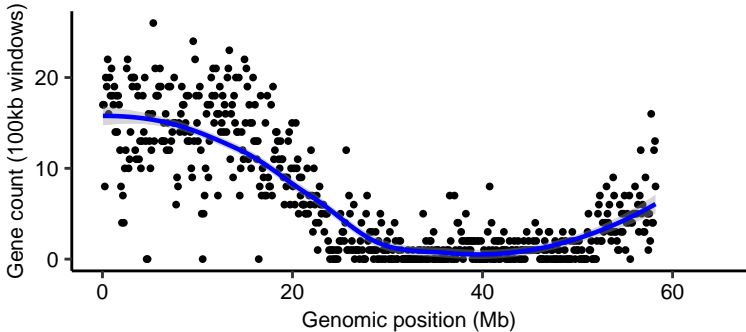

*Panicum hallii* chromosome 4

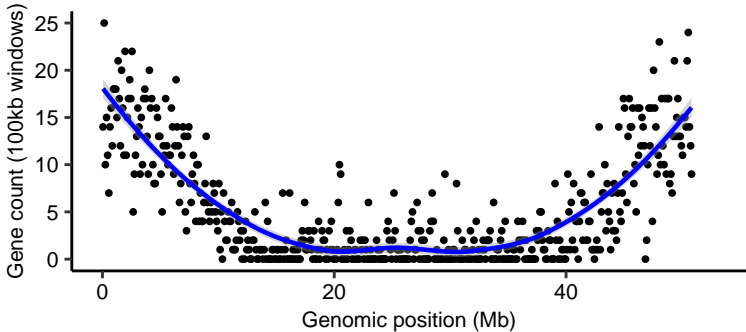

*Panicum hallii* chromosome 5

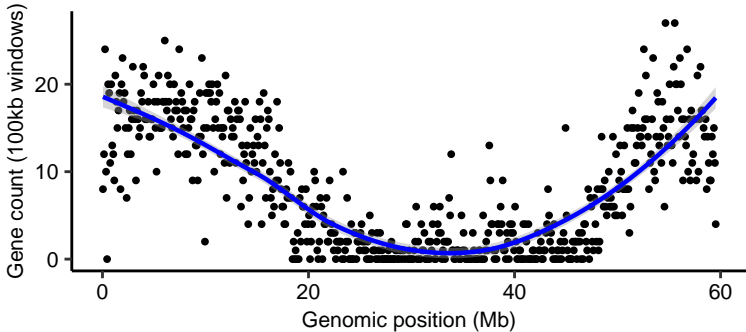



*Panicum hallii* chromosome 6

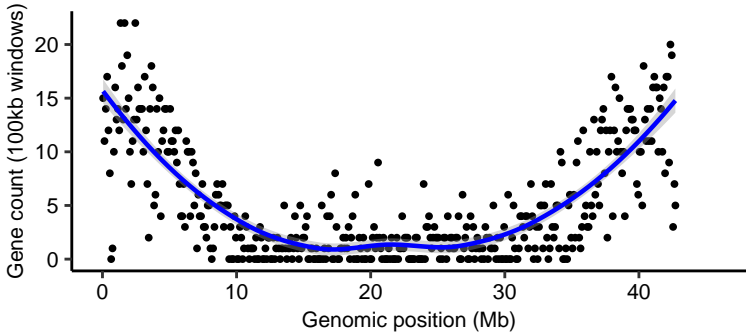

*Panicum hallii* chromosome 7

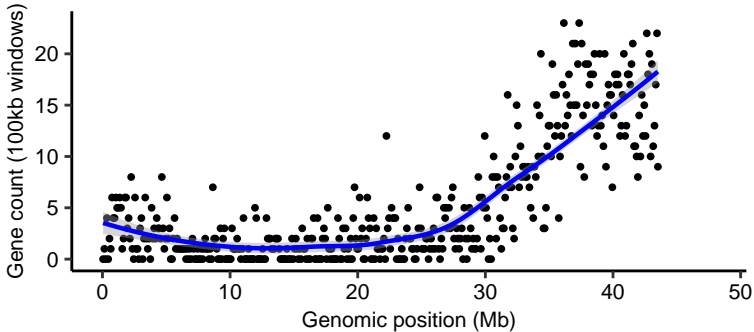

*Panicum hallii* chromosome 8

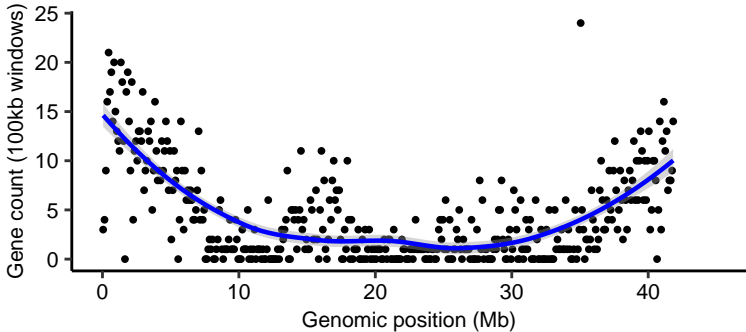

*Panicum hallii* chromosome 9

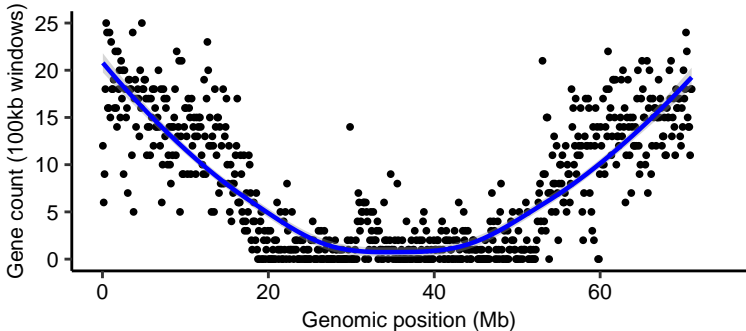

*Phaseolus vulgaris* chromosome 1

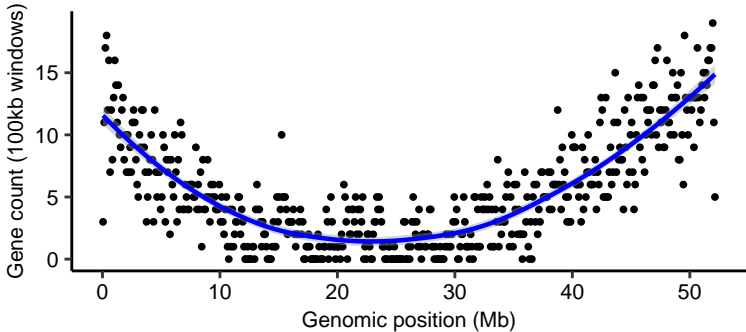

*Phaseolus vulgaris* chromosome 10

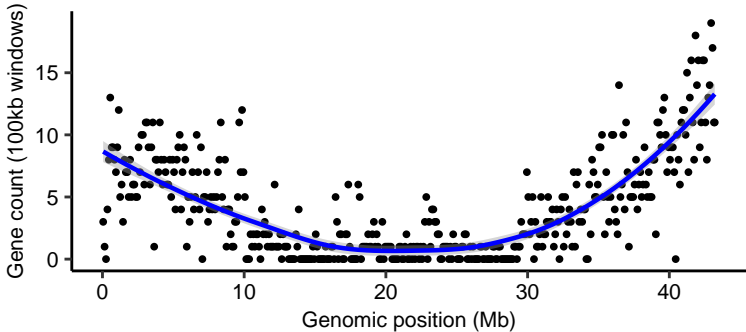

*Phaseolus vulgaris* chromosome 11

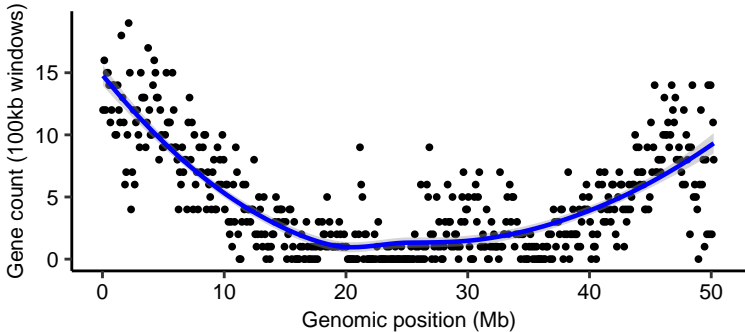

*Phaseolus vulgaris* chromosome 2

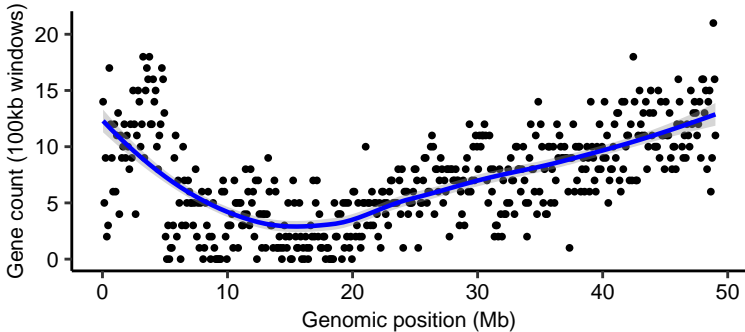



*Phaseolus vulgaris* chromosome 3

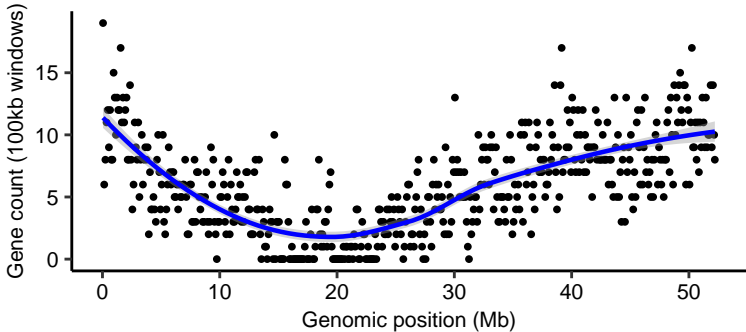

*Phaseolus vulgaris* chromosome 4

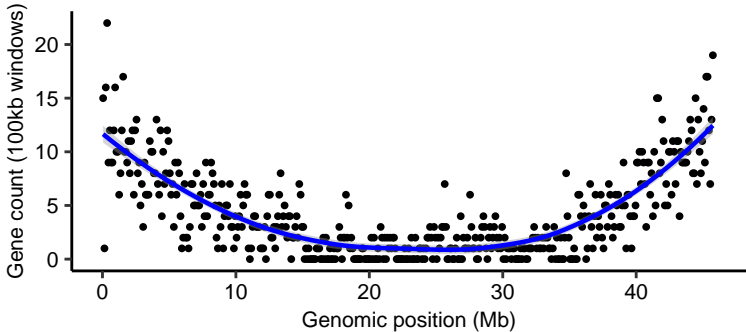

*Phaseolus vulgaris* chromosome 5

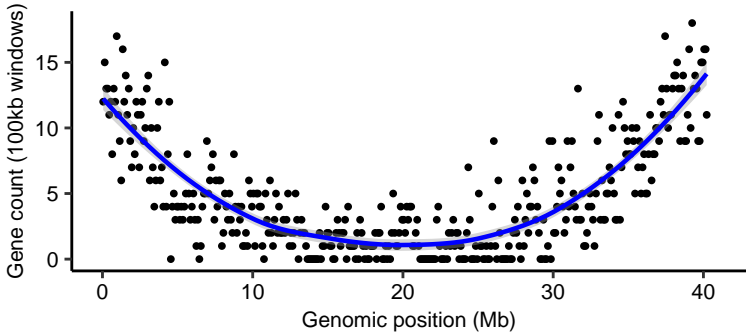

*Phaseolus vulgaris* chromosome 6

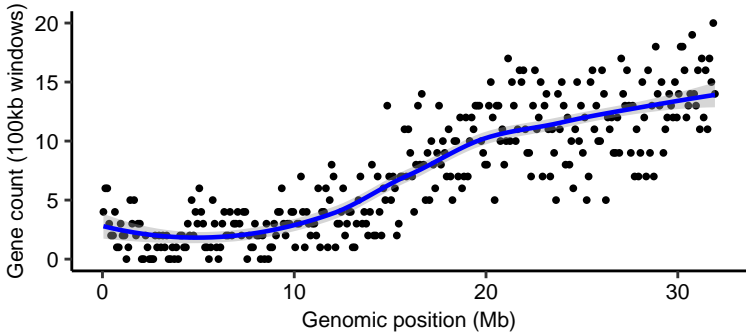

*Phaseolus vulgaris* chromosome 7

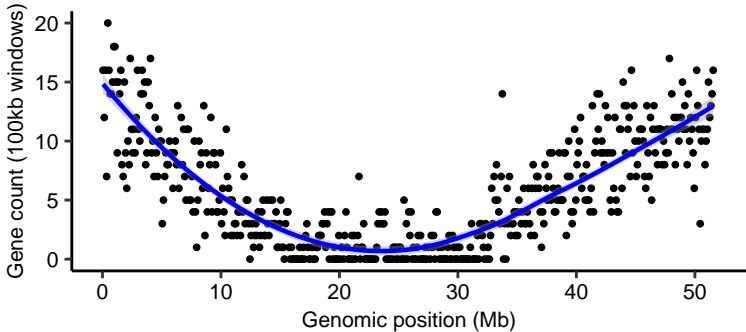

*Phaseolus vulgaris* chromosome 8

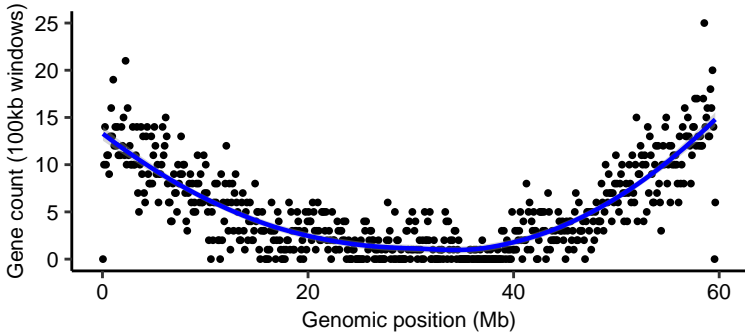

*Phaseolus vulgaris* chromosome 9

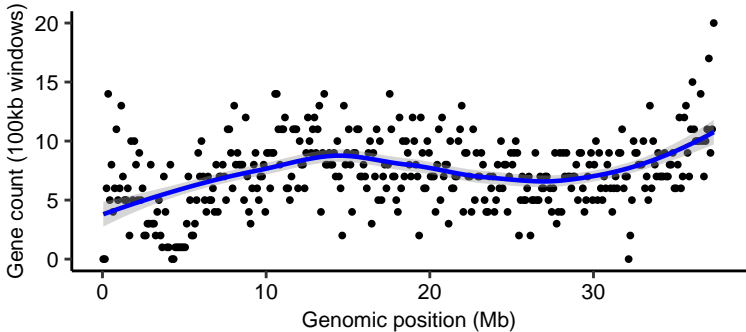

*Prunus mume* chromosome 1

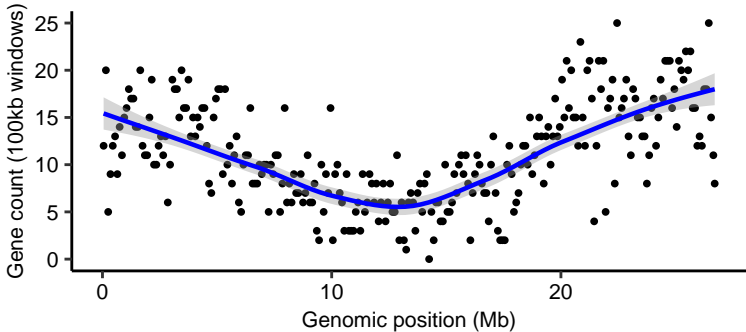



*Prunus mume* chromosome 2

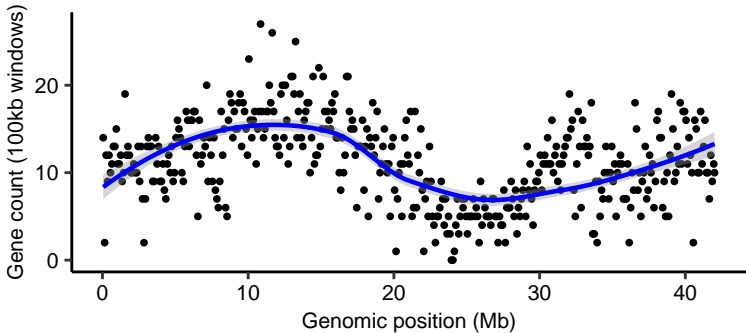

*Prunus mume* chromosome 3

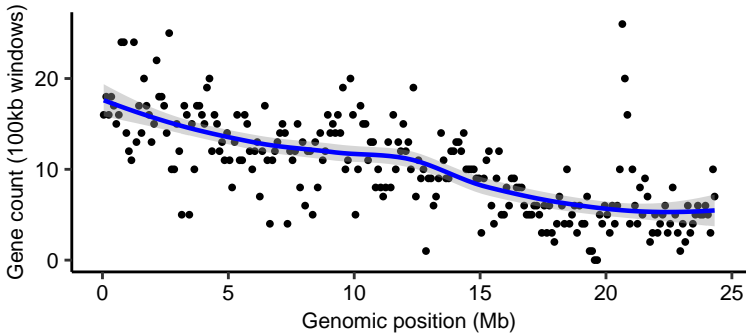

*Prunus mume* chromosome 5

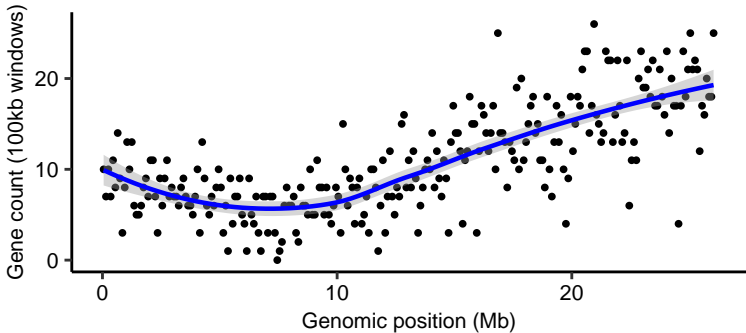

*Prunus mume* chromosome 6

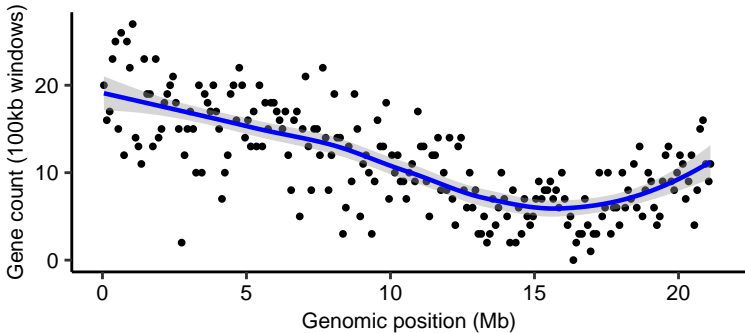

*Prunus mume* chromosome 7

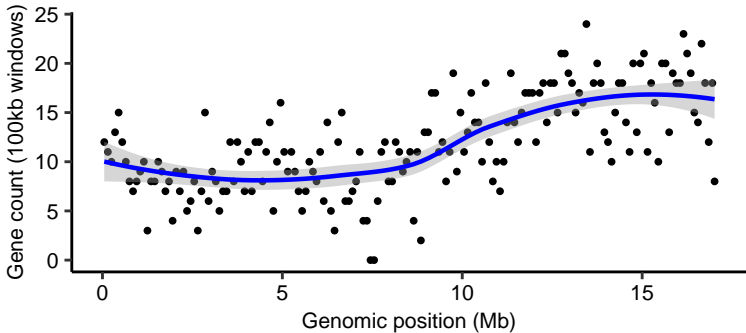

*Prunus mume* chromosome 8

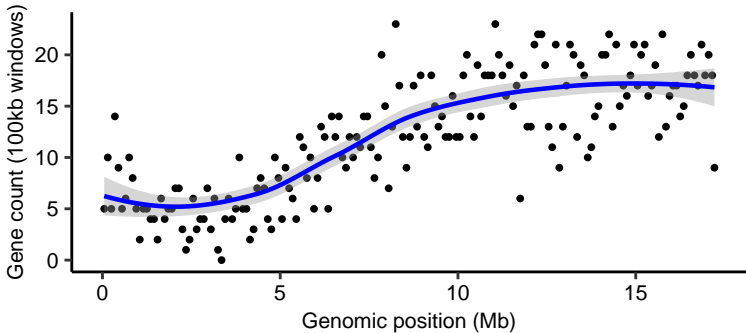

*Prunus persica* chromosome 1

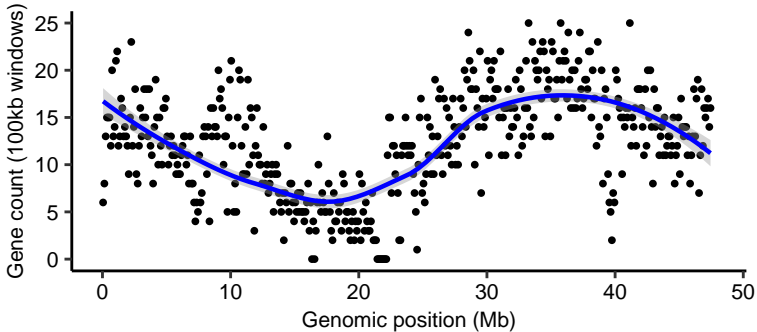

*Prunus persica* chromosome 2

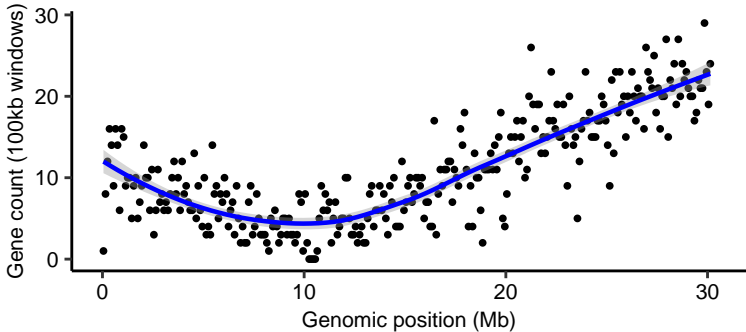



*Prunus persica* chromosome 3

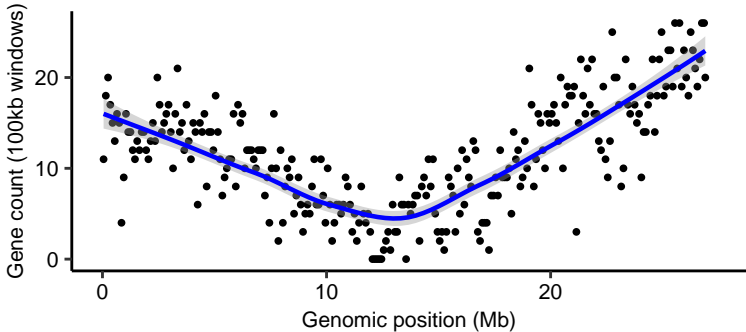

*Prunus persica* chromosome 4

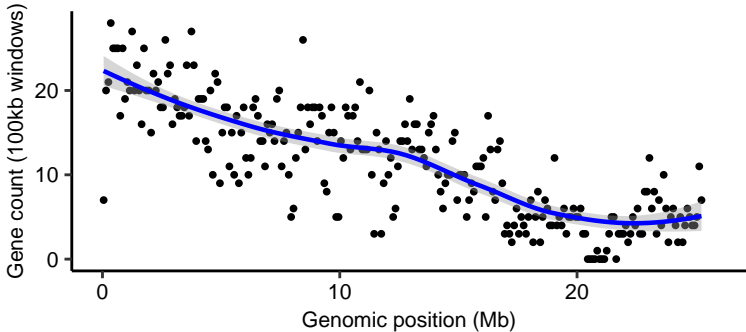

*Prunus persica* chromosome 5

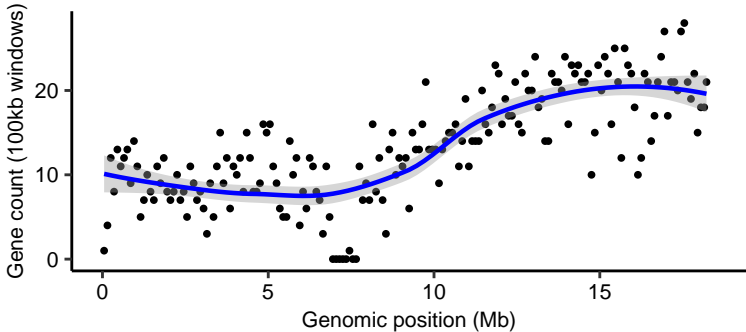

*Prunus persica* chromosome 6

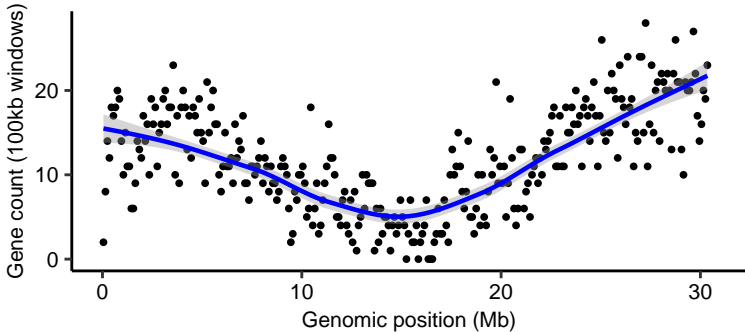

*Prunus persica* chromosome 7

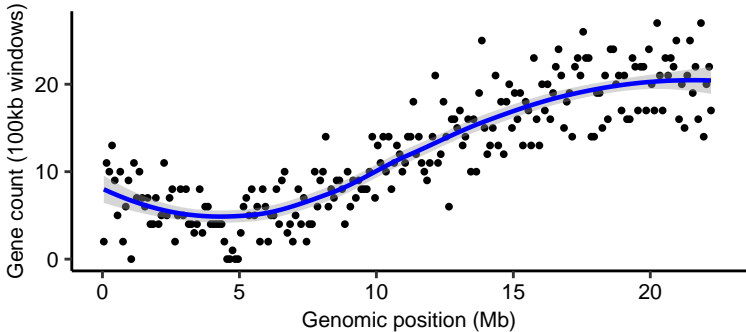

*Prunus persica* chromosome 8

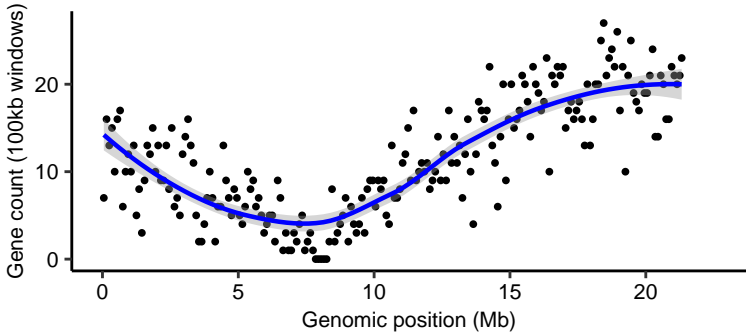

# *Sesamum indicum* chromosome 11

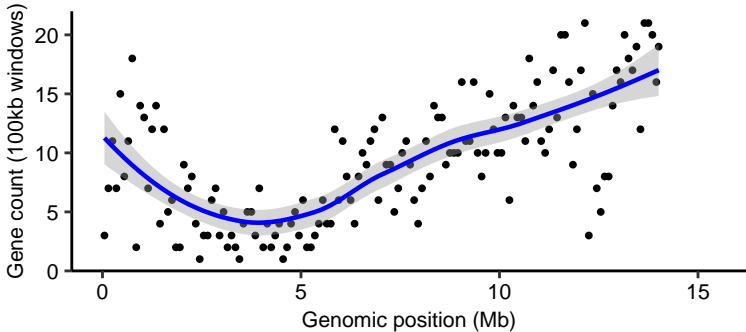

## *Sesamum indicum* chromosome 2

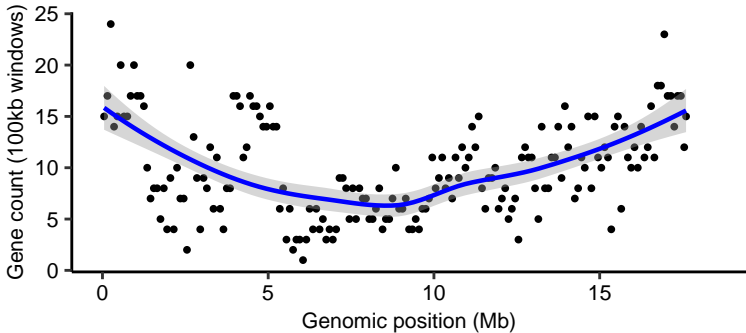



### *Sesamum indicum* chromosome 3

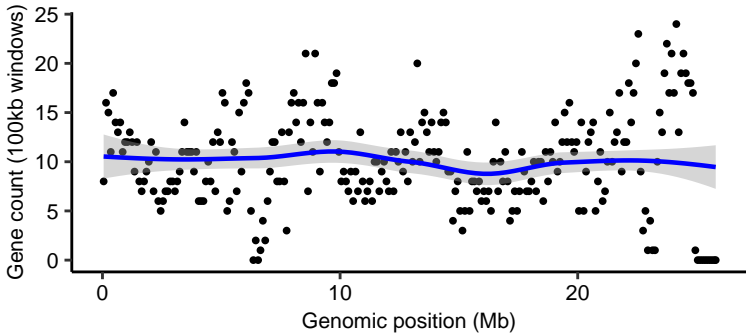

### *Sesamum indicum* chromosome 5

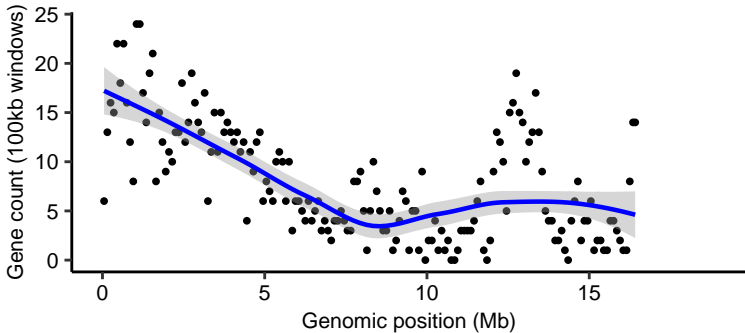

# *Sesamum indicum* chromosome 6

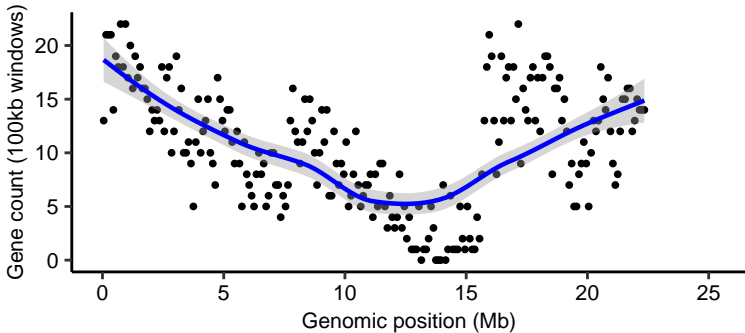

*Setaria italica* chromosome 1

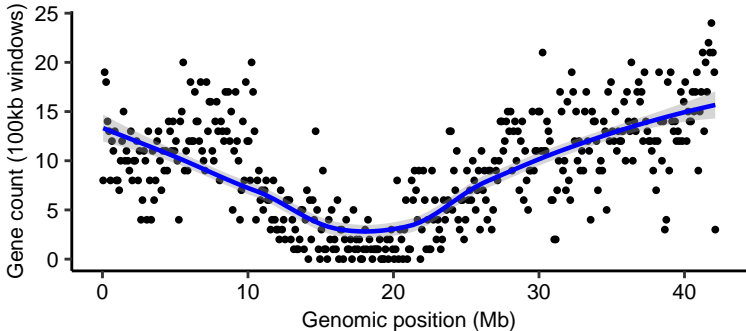

*Setaria italica* chromosome 2

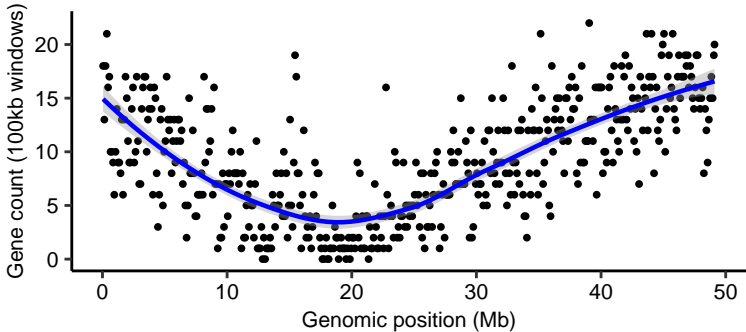

*Setaria italica* chromosome 3

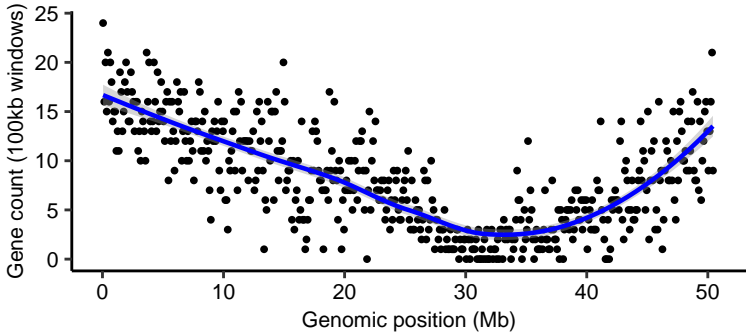

# *Setaria italica* chromosome 4

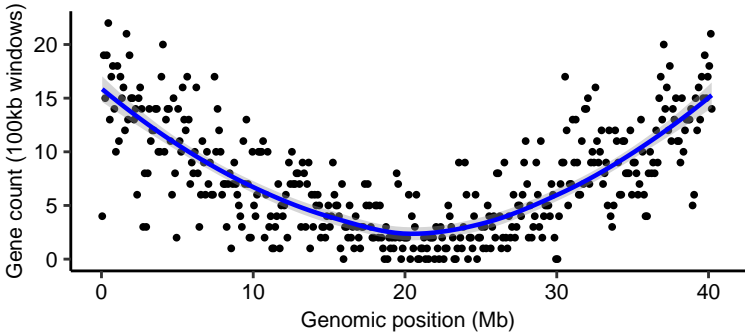

*Setaria italica* chromosome 5

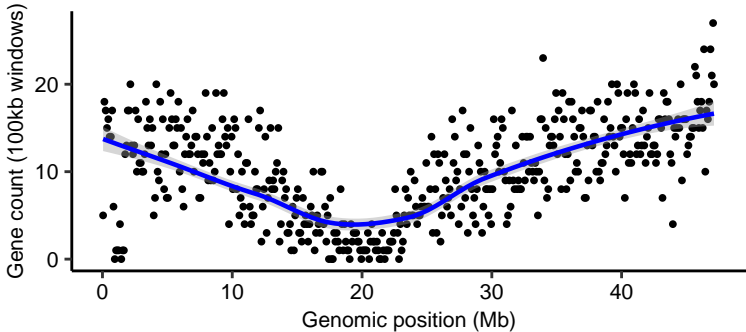



*Setaria italica* chromosome 6

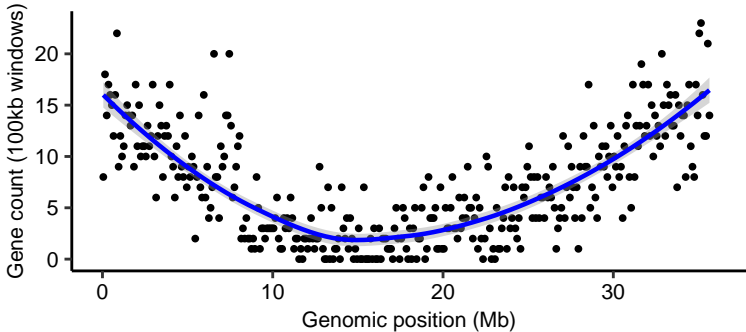

# *Setaria italica* chromosome 7

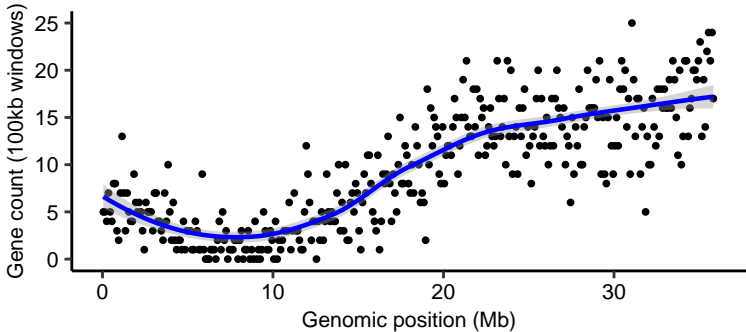

# *Setaria italica* chromosome 8

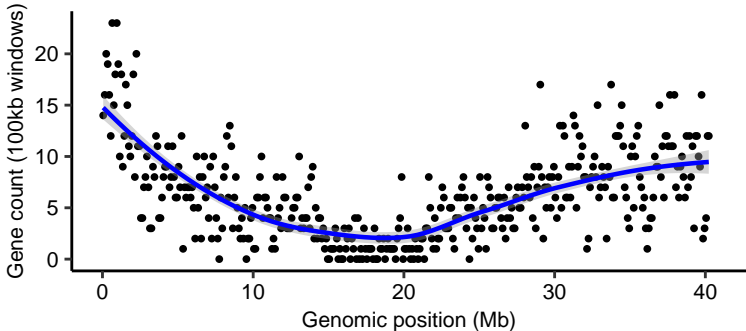

*Setaria italica* chromosome 9

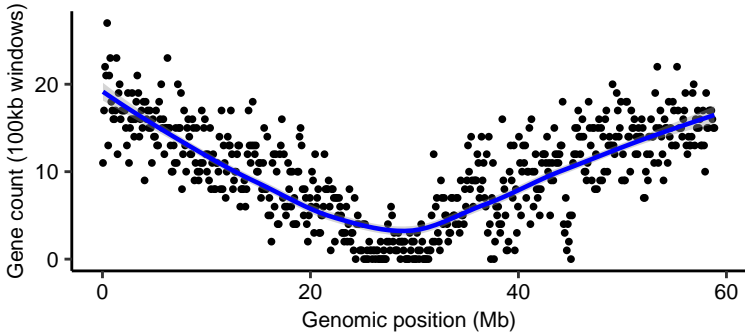

*Solanum lycopersicum* chromosome 1

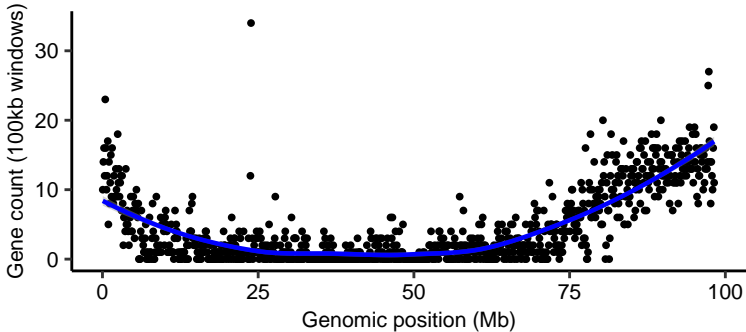

*Solanum lycopersicum* chromosome 10

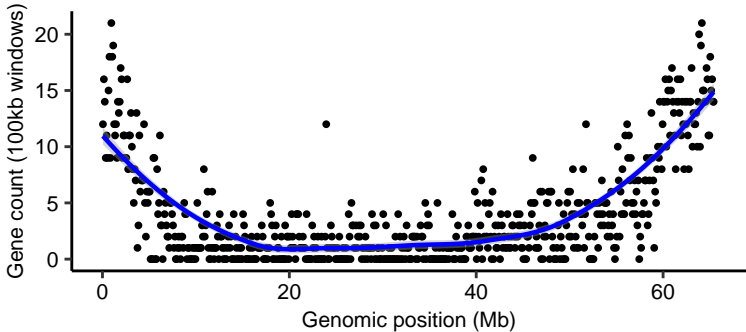

*Solanum lycopersicum* chromosome 11

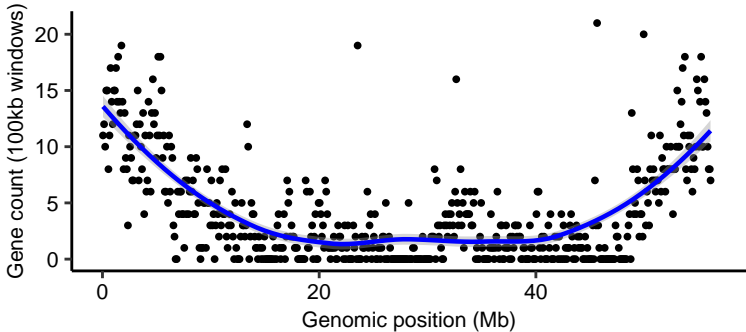

# *Solanum lycopersicum* chromosome 12

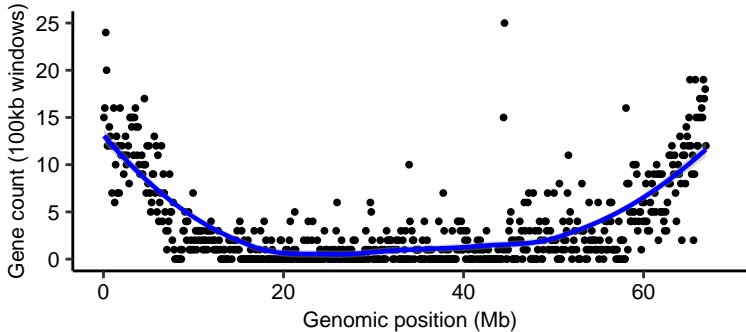



## *Solanum lycopersicum* chromosome 2

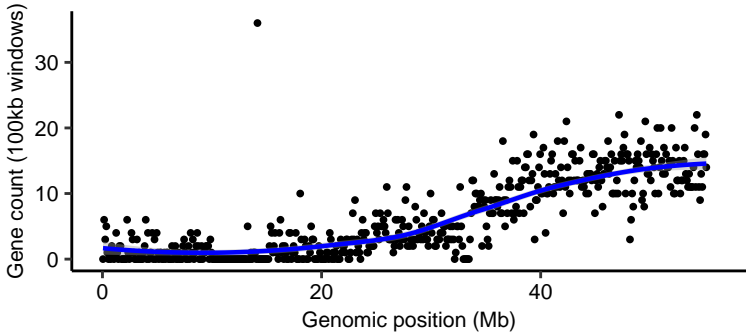

*Solanum lycopersicum* chromosome 3

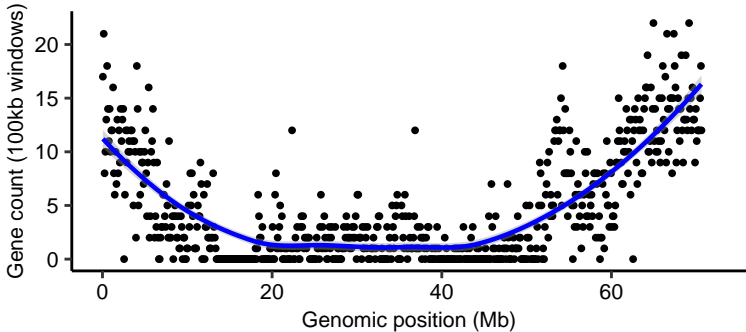

*Solanum lycopersicum* chromosome 4

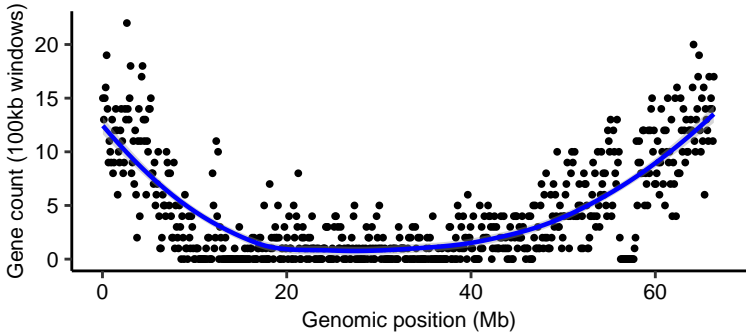

*Solanum lycopersicum* chromosome 5

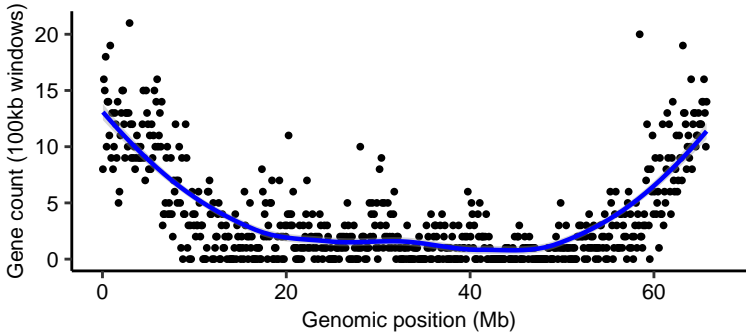

*Solanum lycopersicum* chromosome 6

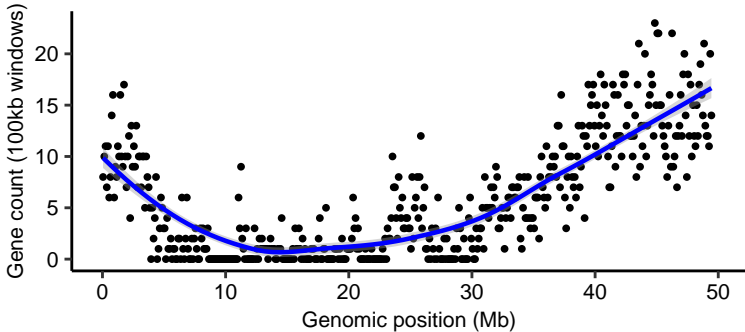

*Solanum lycopersicum* chromosome 7

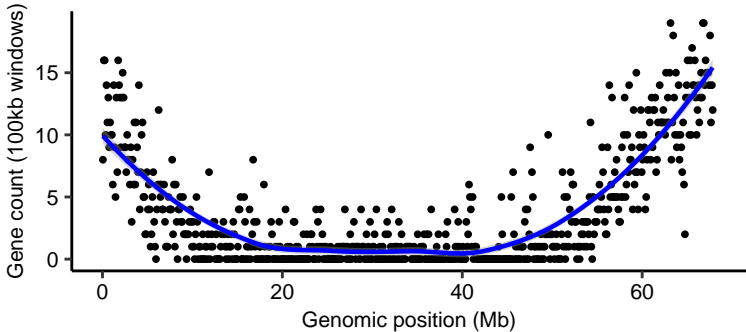

*Solanum lycopersicum* chromosome 8

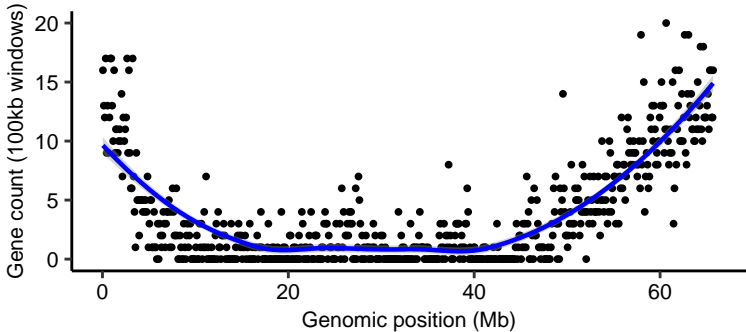

*Solanum lycopersicum* chromosome 9

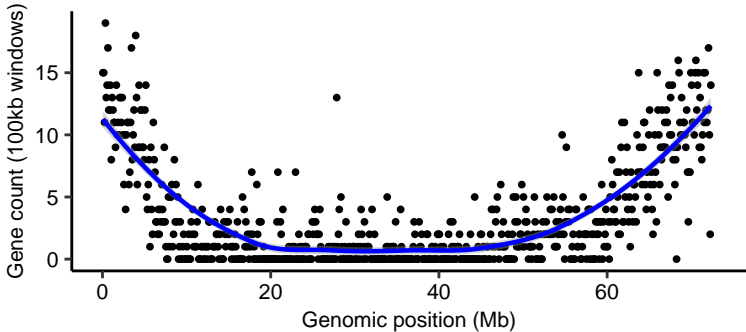



# *Solanum tuberosum* chromosome 1

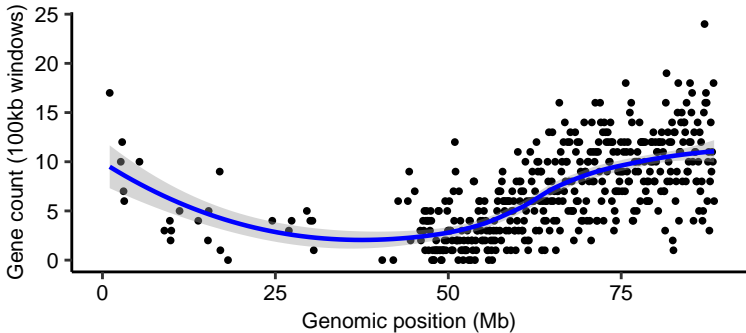

# *Solanum tuberosum* chromosome 10

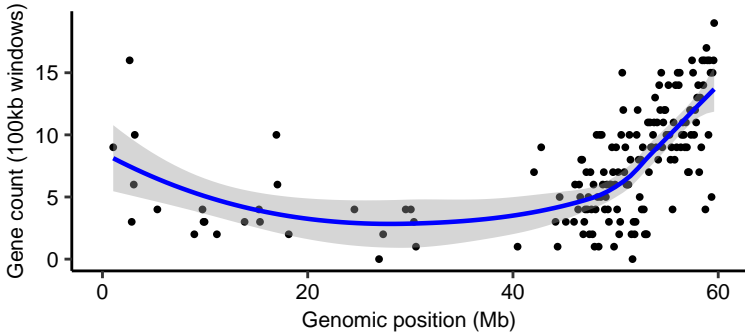

# *Solanum tuberosum* chromosome 11

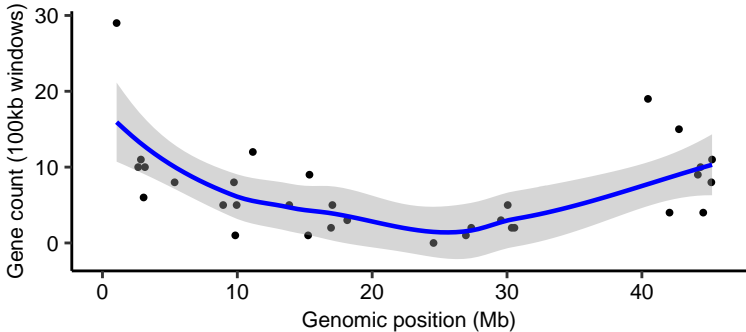

## *Solanum tuberosum* chromosome 12

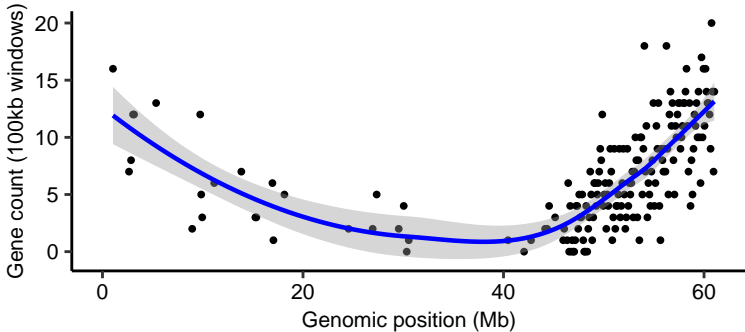

## *Solanum tuberosum* chromosome 2

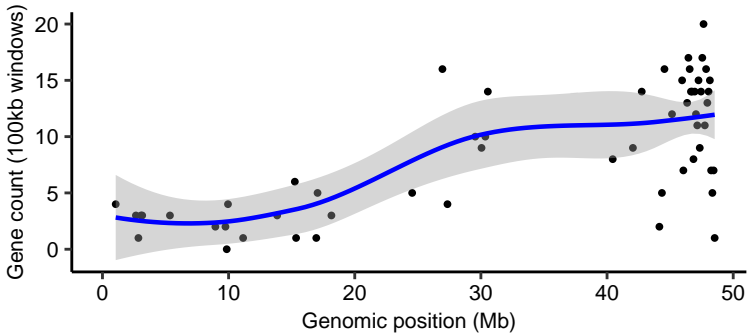

### *Solanum tuberosum* chromosome 3

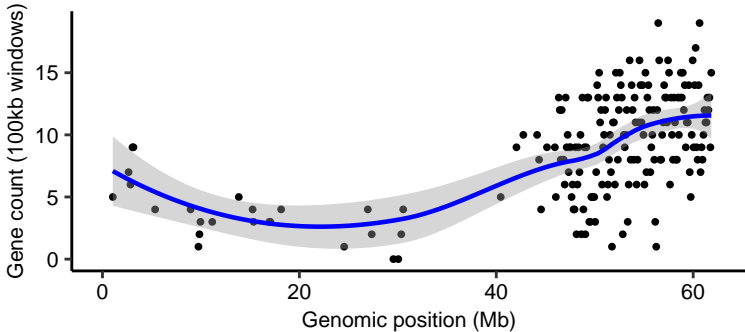

# *Solanum tuberosum* chromosome 4

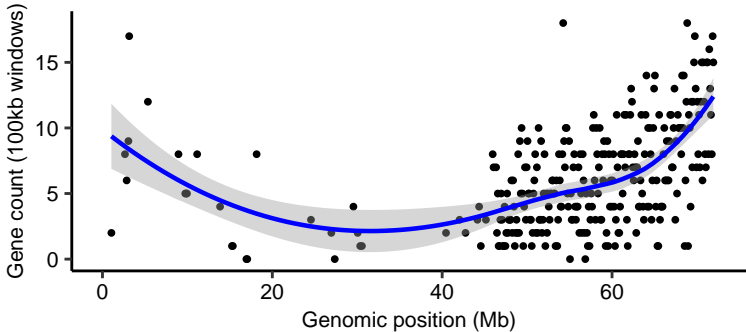

# *Solanum tuberosum* chromosome 5

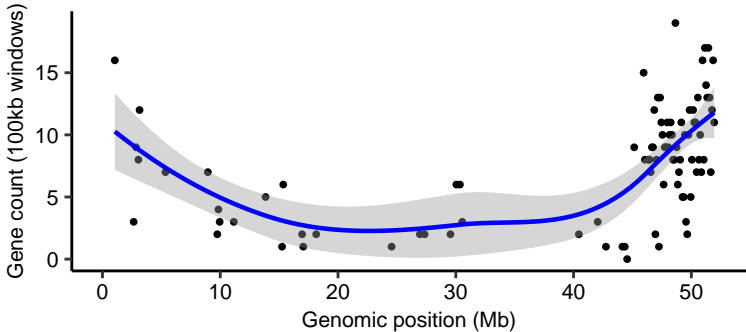



# *Solanum tuberosum* chromosome 6

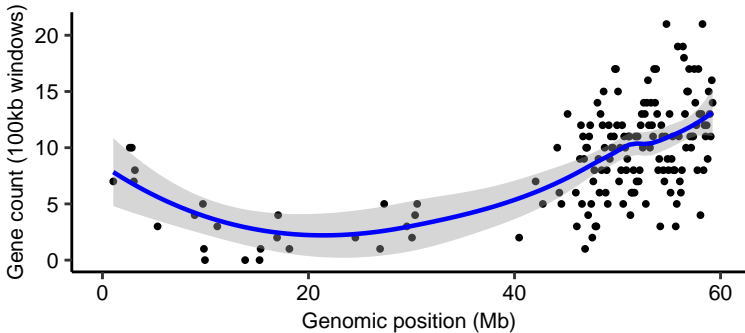

# *Solanum tuberosum* chromosome 7

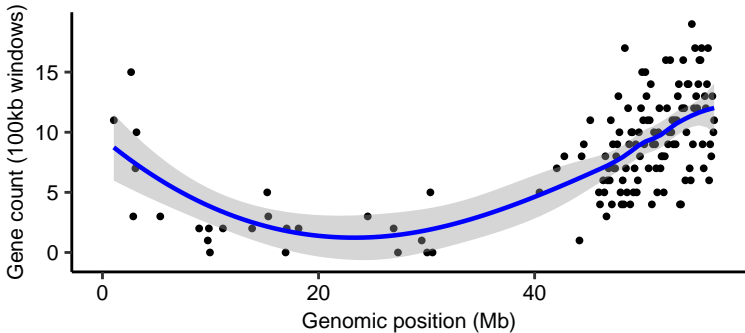

# *Solanum tuberosum* chromosome 8

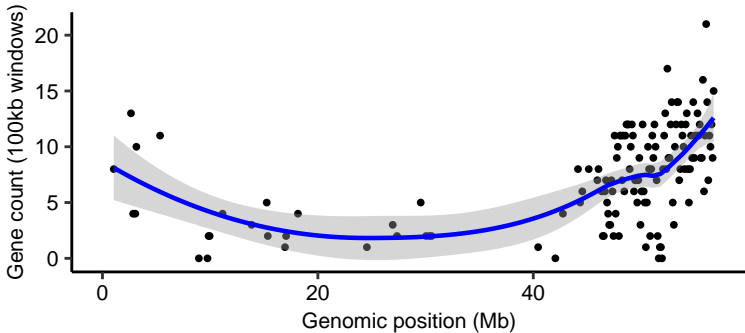

# *Solanum tuberosum* chromosome 9

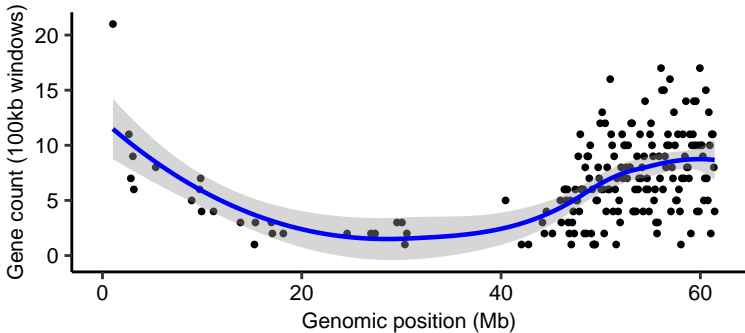

# *Sorghum bicolor* chromosome 1

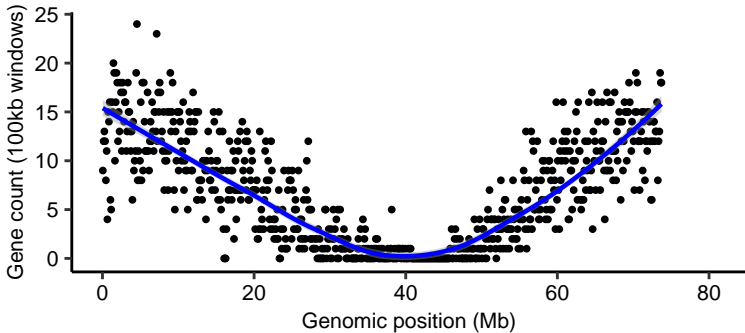

*Sorghum bicolor* chromosome 10

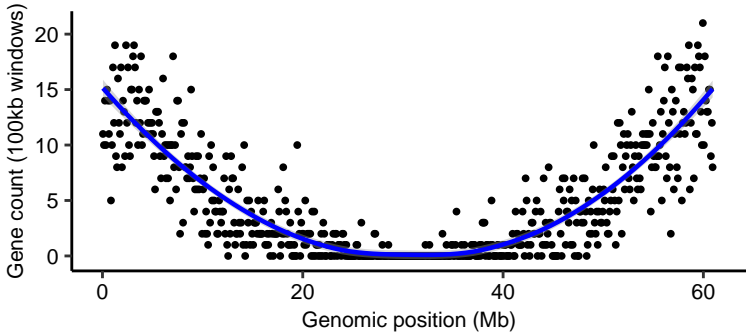

## *Sorghum bicolor* chromosome 2

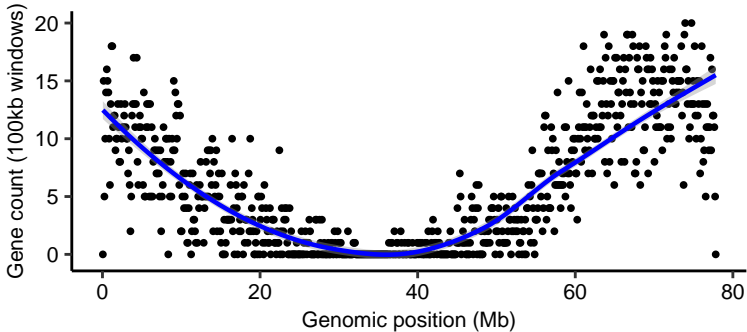

### *Sorghum bicolor* chromosome 3

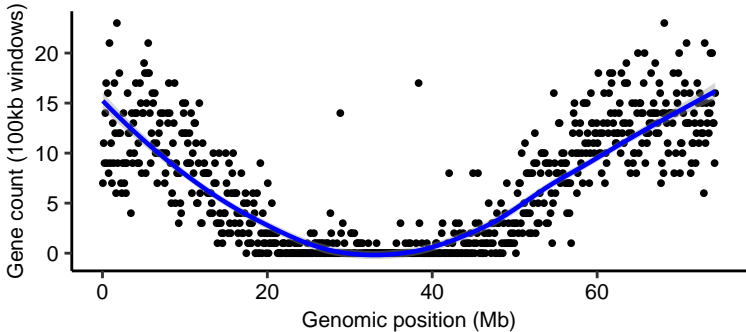



# *Sorghum bicolor* chromosome 4

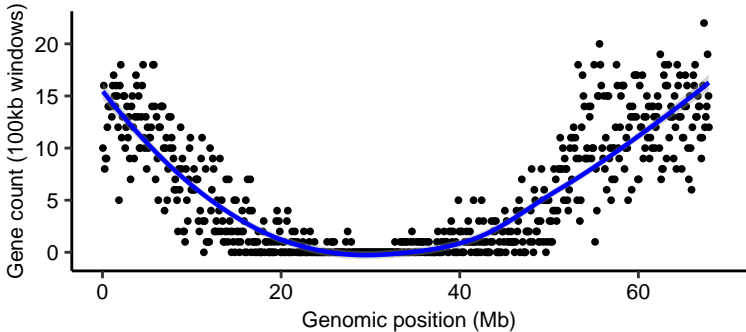

# *Sorghum bicolor* chromosome 5

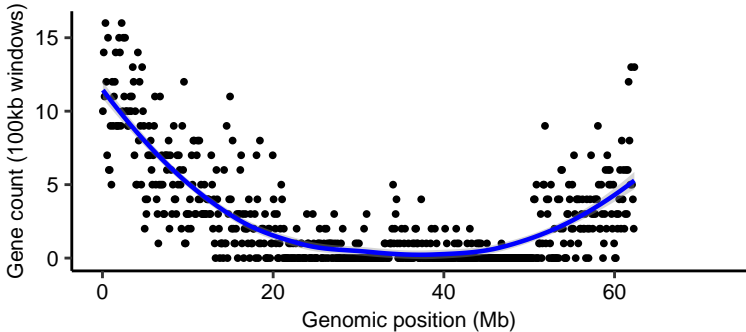

## *Sorghum bicolor* chromosome 6

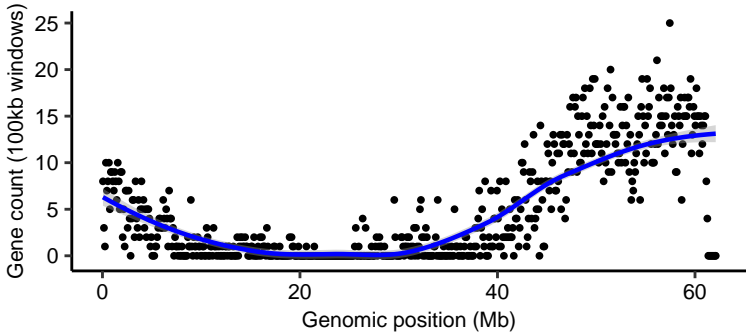

# *Sorghum bicolor* chromosome 7

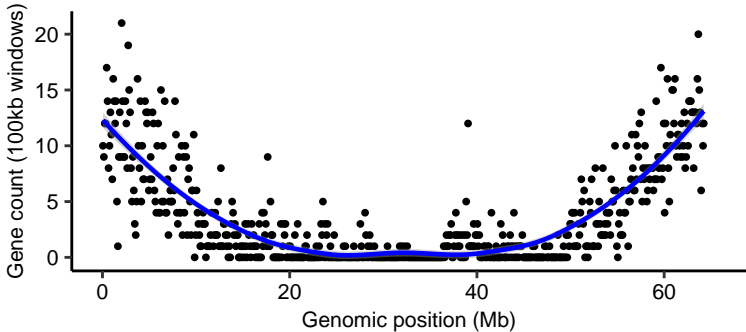

# *Sorghum bicolor* chromosome 8

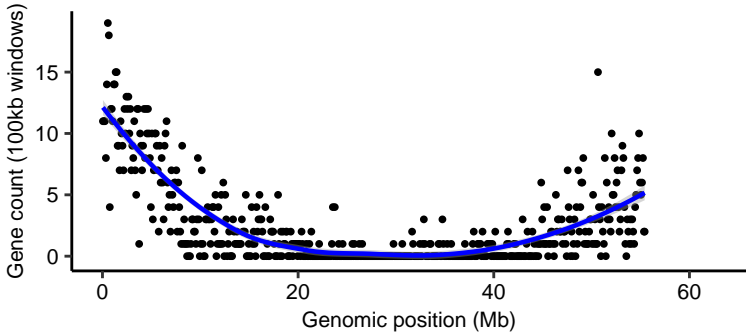

# *Sorghum bicolor* chromosome 9

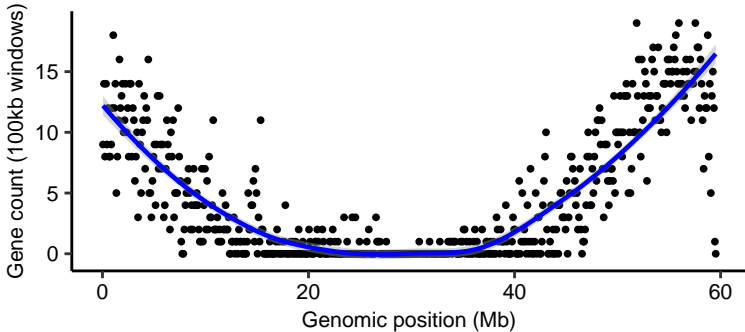

*Theobroma cacao* chromosome 1

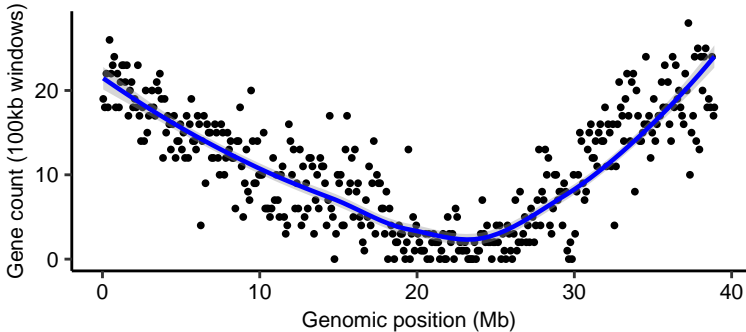

*Theobroma cacao* chromosome 10

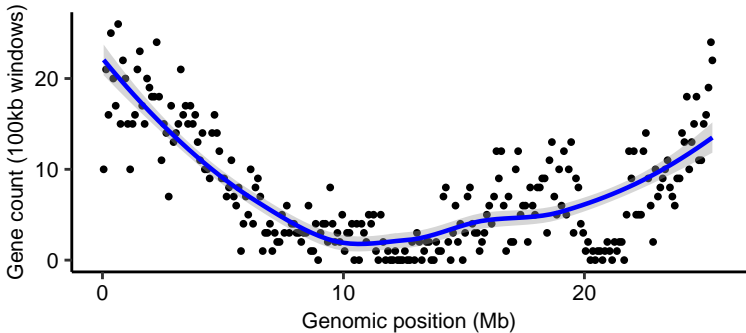



*Theobroma cacao* chromosome 2

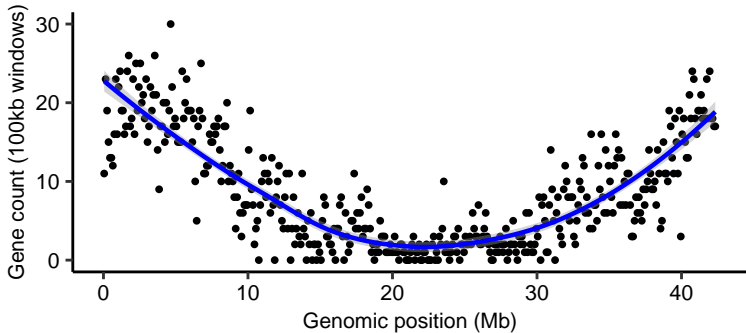

*Theobroma cacao* chromosome 3

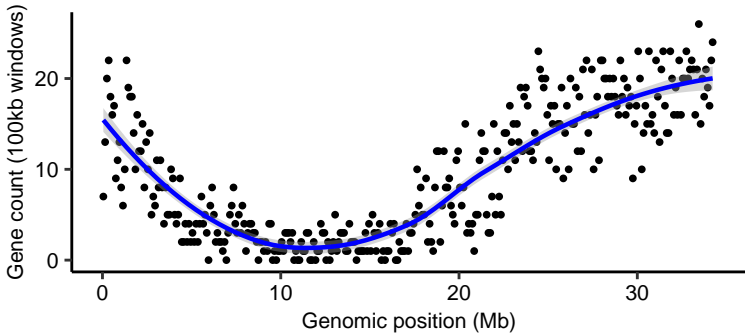

*Theobroma cacao* chromosome 4

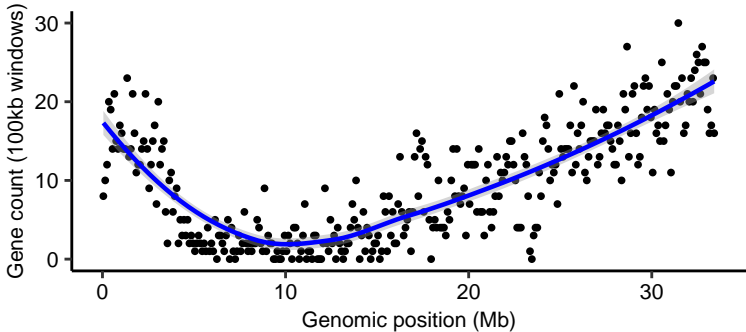

*Theobroma cacao* chromosome 5

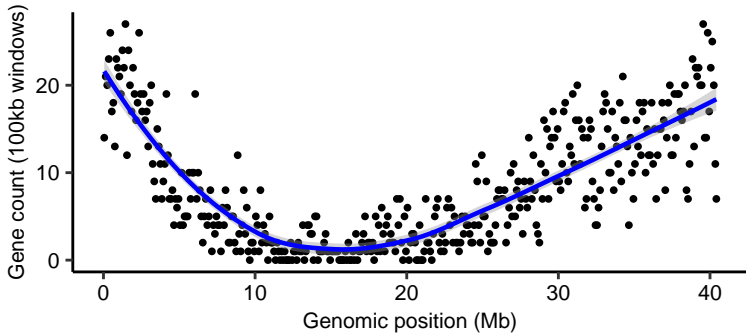

*Theobroma cacao* chromosome 6

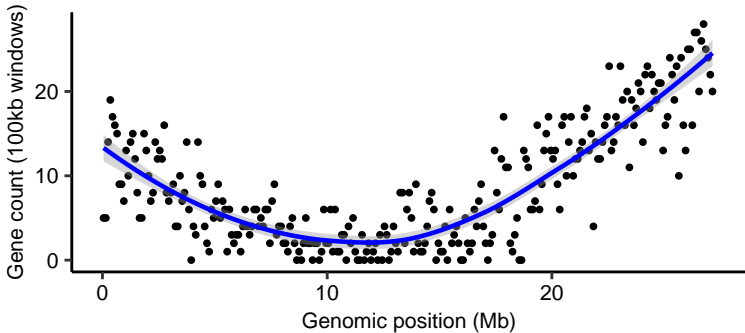

*Theobroma cacao* chromosome 7

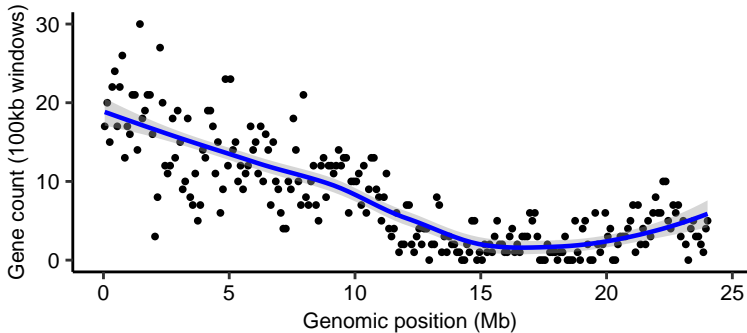

*Theobroma cacao* chromosome 8

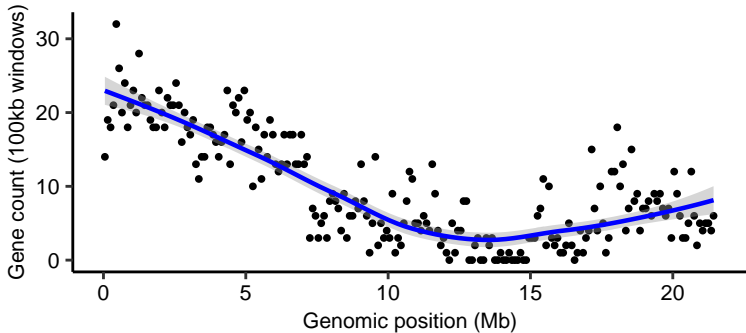

*Theobroma cacao* chromosome 9

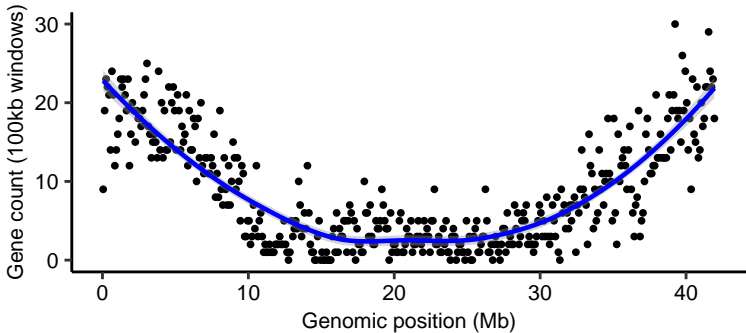



*Triticum aestivum* chromosome 1A

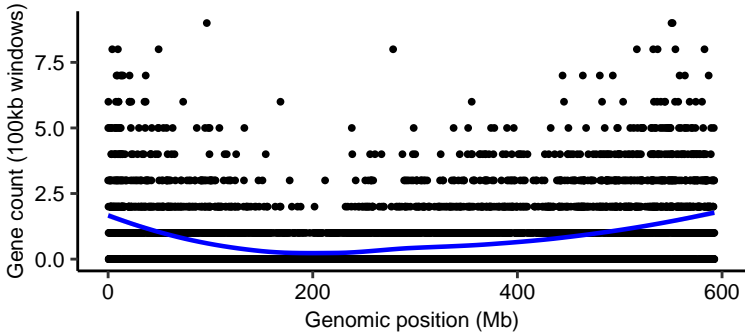

*Triticum aestivum* chromosome 1B

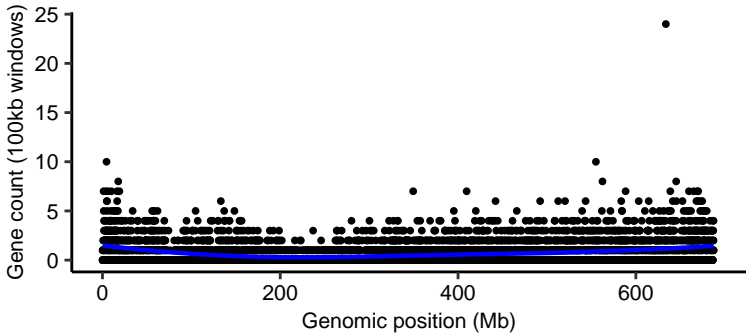

*Triticum aestivum* chromosome 1D

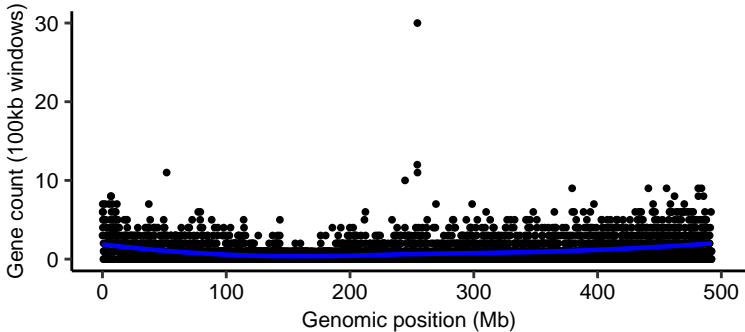

*Triticum aestivum* chromosome 2A

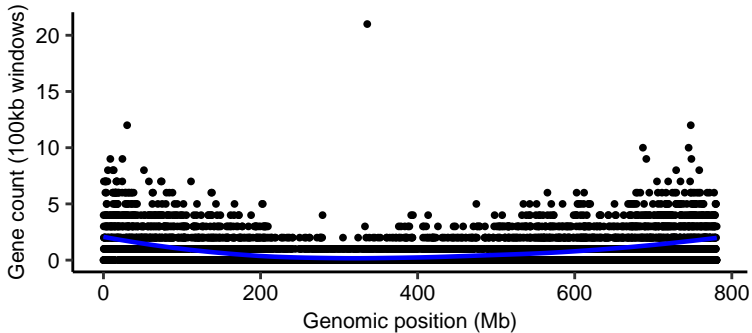

*Triticum aestivum* chromosome 2B

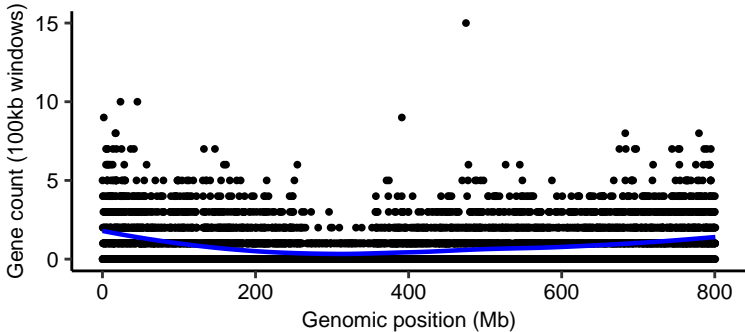

*Triticum aestivum* chromosome 2D

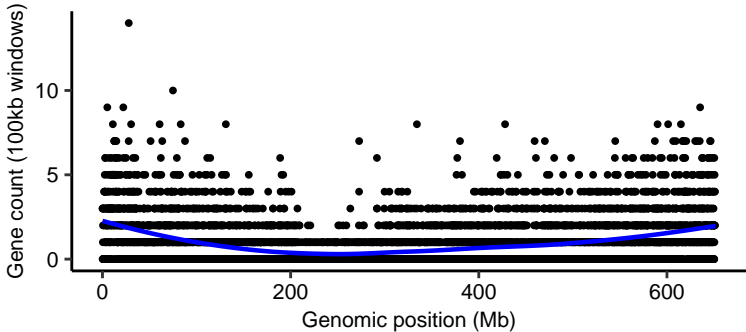

*Triticum aestivum* chromosome 3A

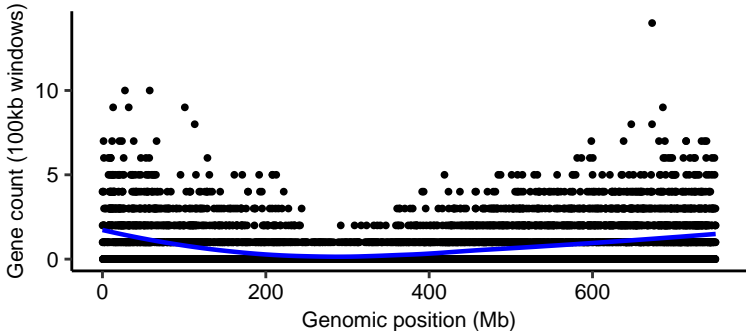

*Triticum aestivum* chromosome 3B

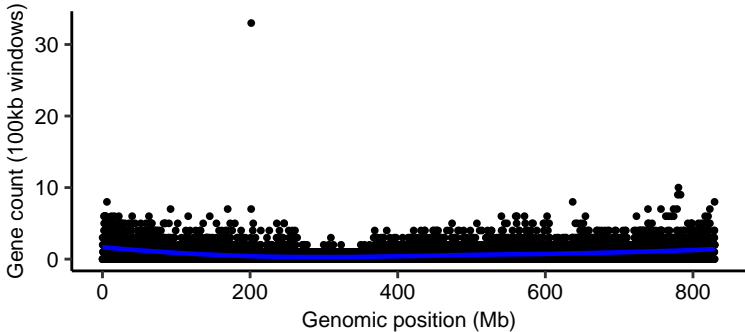



# *Triticum aestivum* chromosome 3D

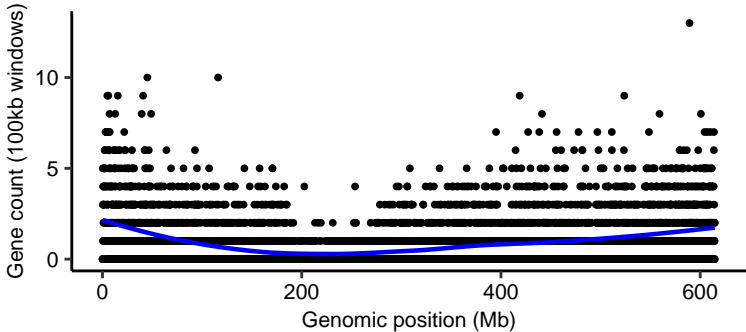

*Triticum aestivum* chromosome 4A

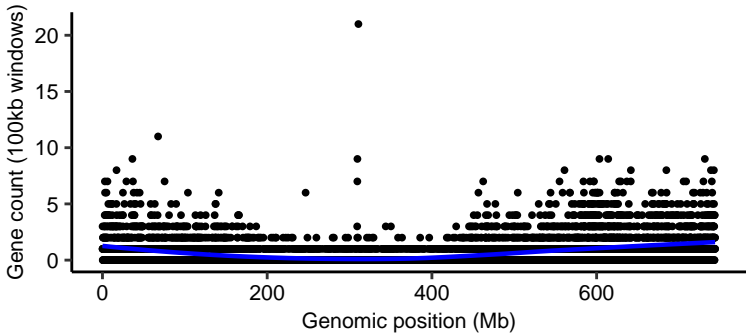

*Triticum aestivum* chromosome 4B

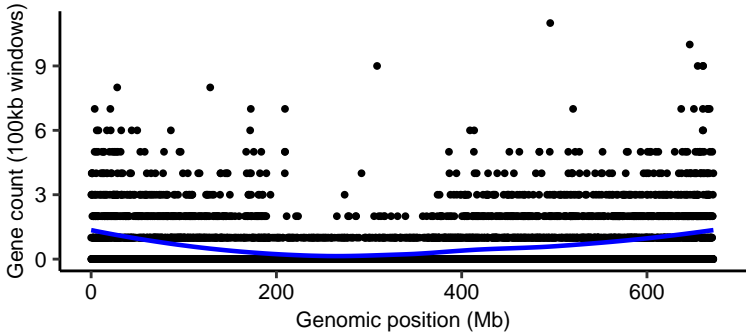

*Triticum aestivum* chromosome 4D

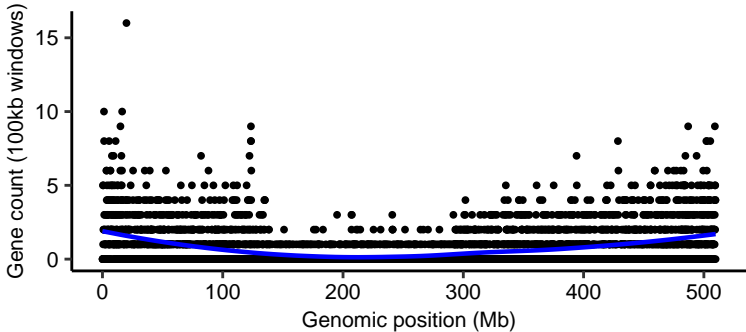

*Triticum aestivum* chromosome 5B

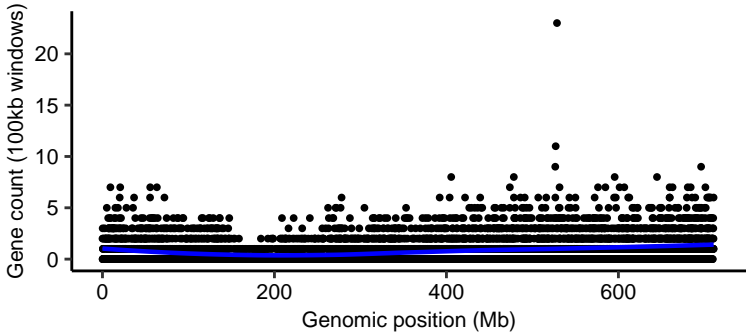

*Triticum aestivum* chromosome 5D

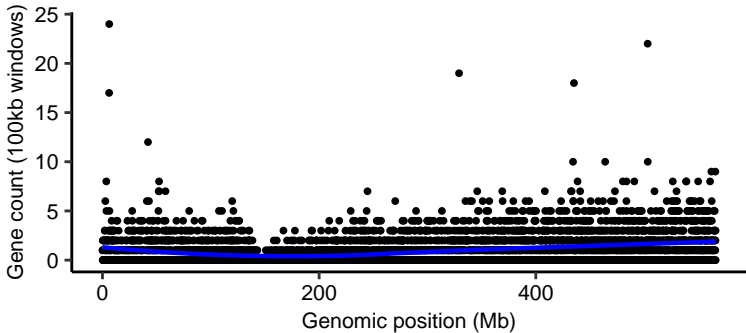

*Triticum aestivum* chromosome 6A

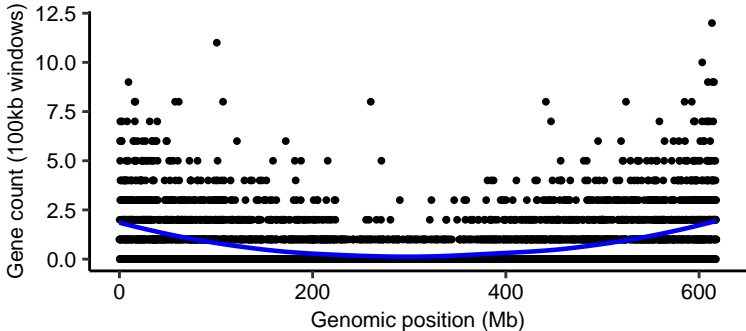

*Triticum aestivum* chromosome 6B

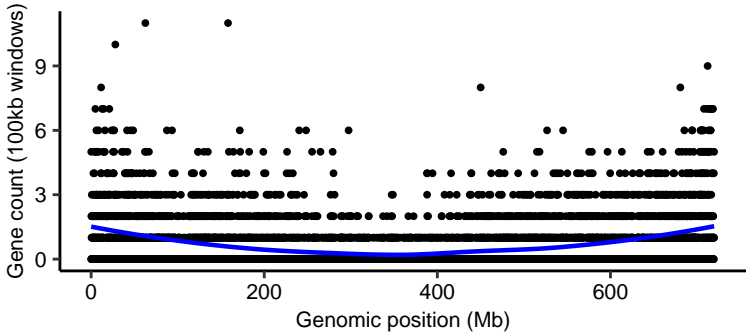



*Triticum aestivum* chromosome 6D

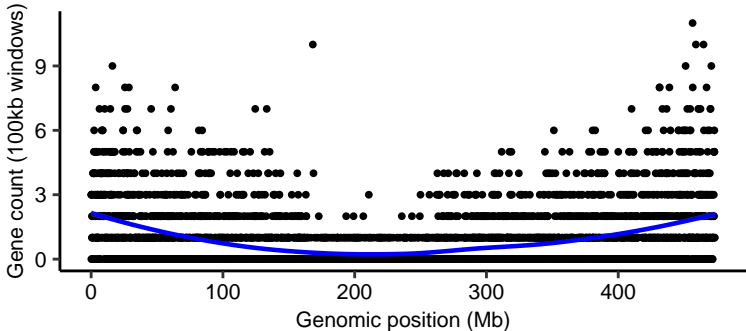

*Triticum aestivum* chromosome 7A

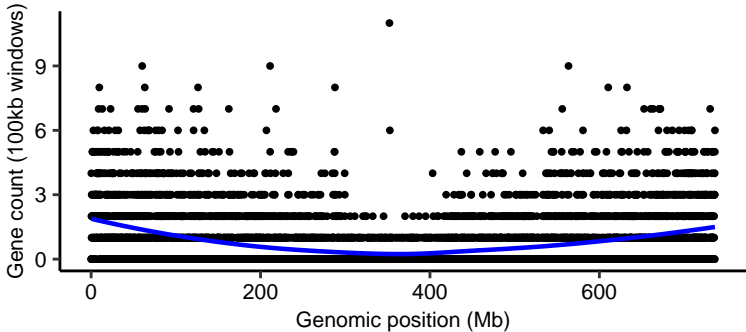

*Triticum aestivum* chromosome 7B

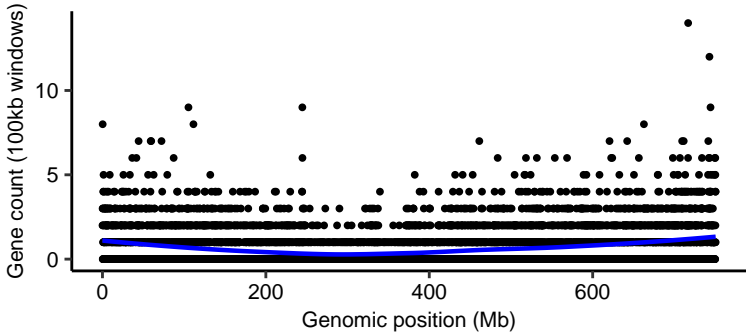

*Triticum aestivum* chromosome 7D

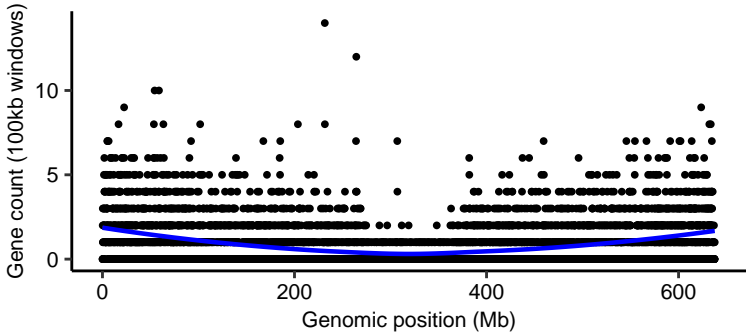

*Vigna unguiculata* chromosome 1

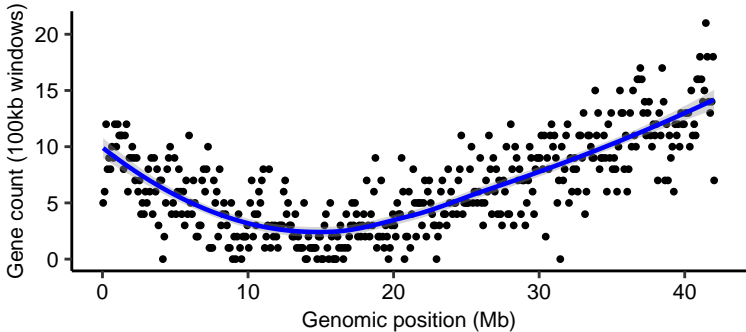

*Vigna unguiculata* chromosome 10

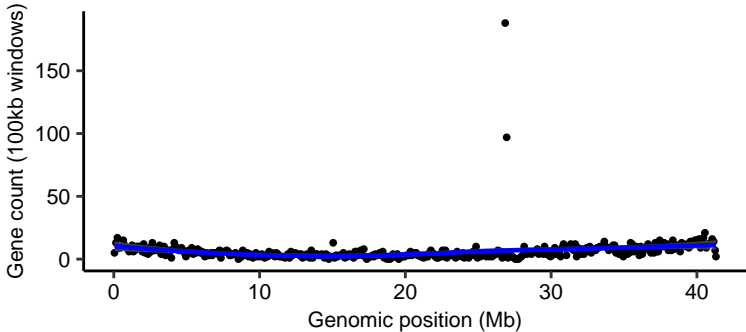

*Vigna unguiculata* chromosome 11

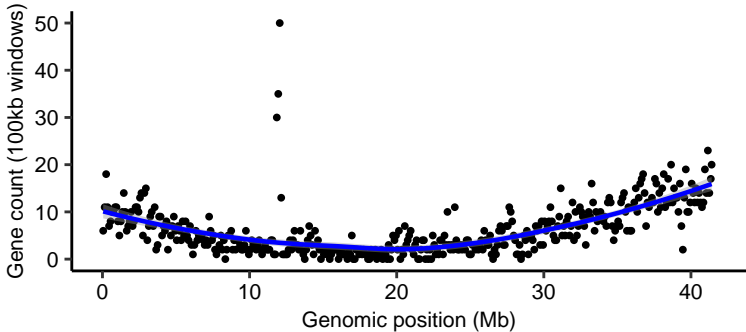

# *Vigna unguiculata* chromosome 2

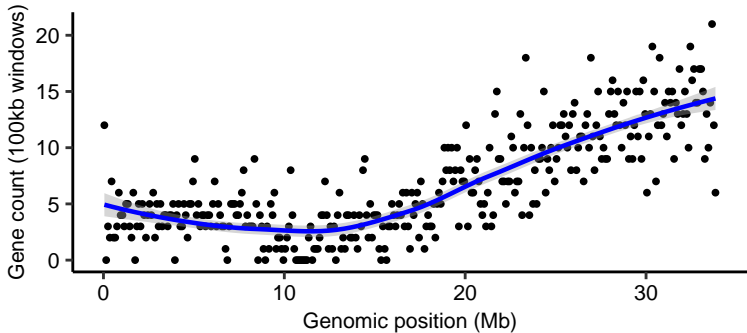



*Vigna unguiculata* chromosome 3

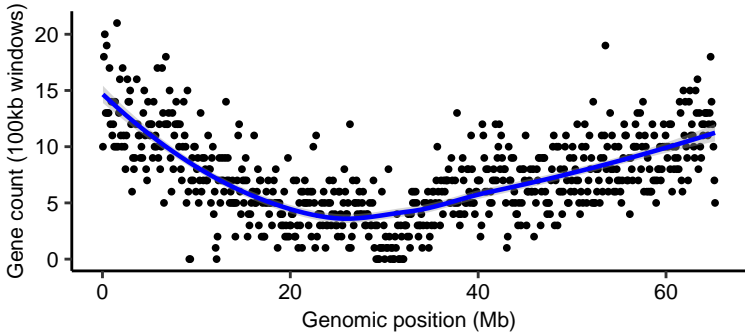

*Vigna unguiculata* chromosome 4

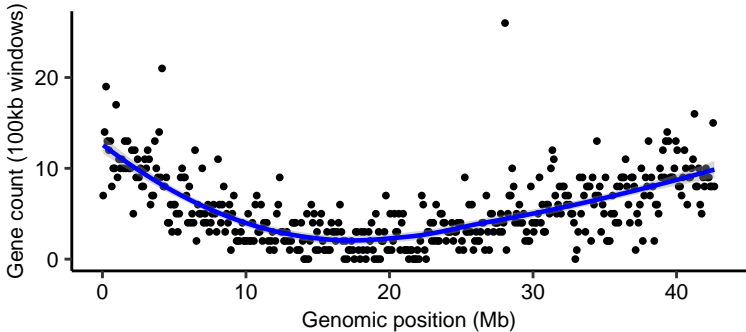

*Vigna unguiculata* chromosome 5

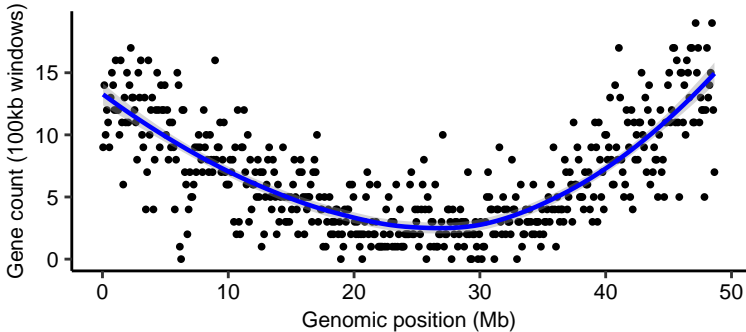

*Vigna unguiculata* chromosome 6

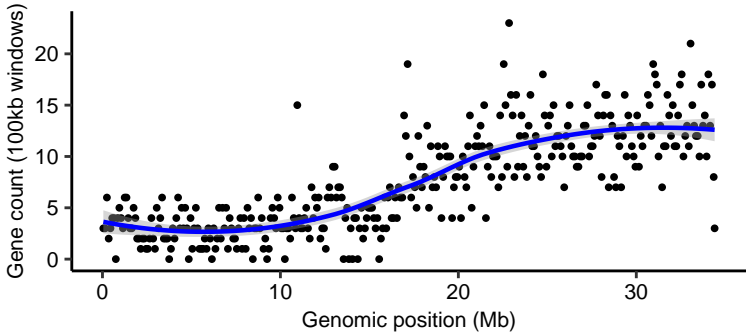

*Vigna unguiculata* chromosome 7

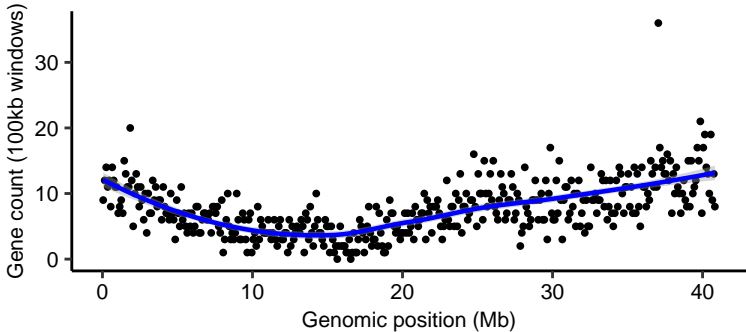

*Vigna unguiculata* chromosome 8

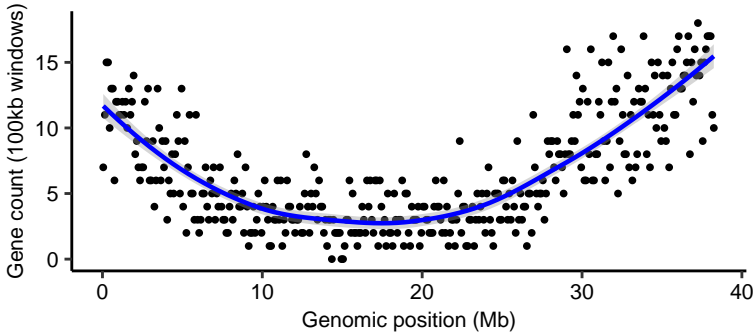

*Vigna unguiculata* chromosome 9

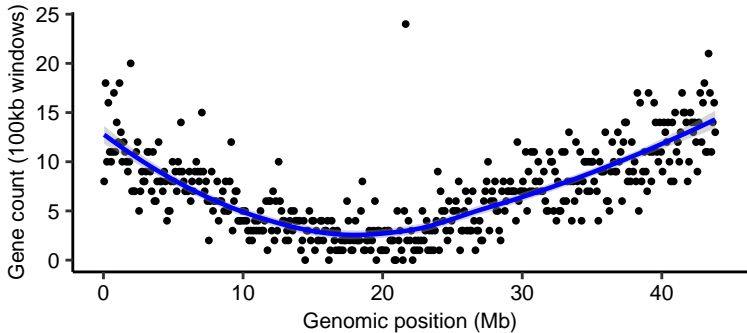

*Vitis vinifera* chromosome 1

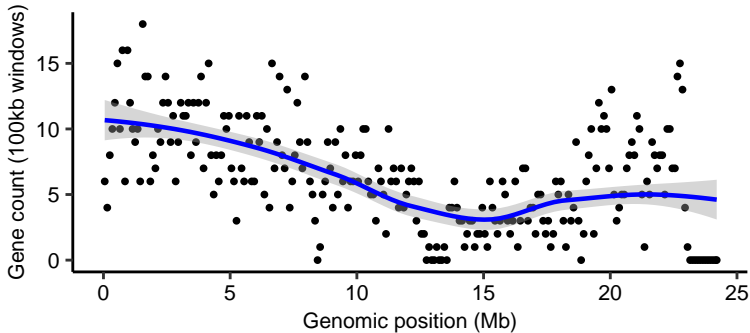



*Vitis vinifera* chromosome 11

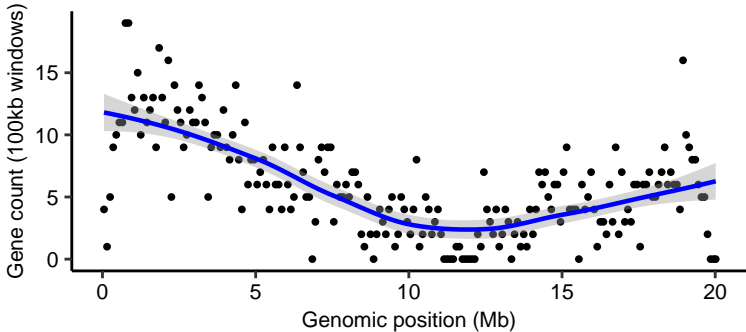

*Vitis vinifera* chromosome 14

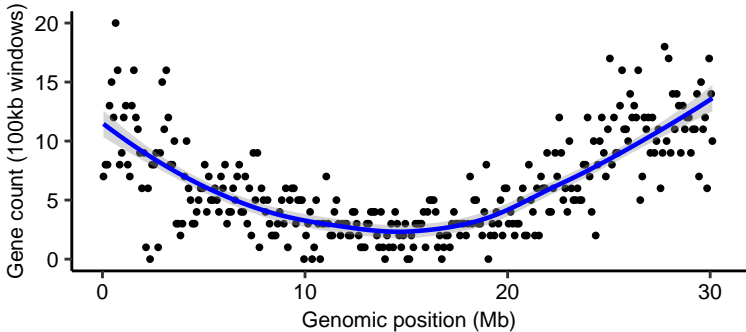

*Vitis vinifera* chromosome 15

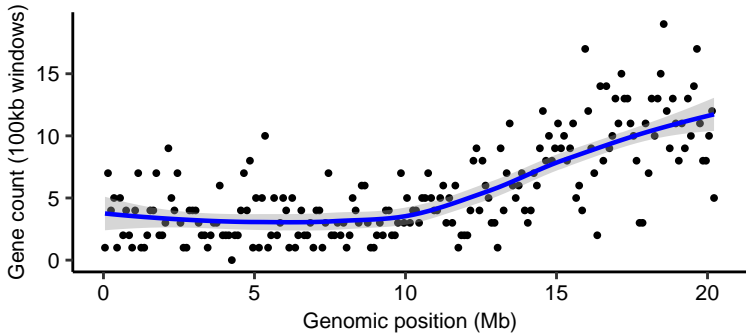

*Vitis vinifera* chromosome 17

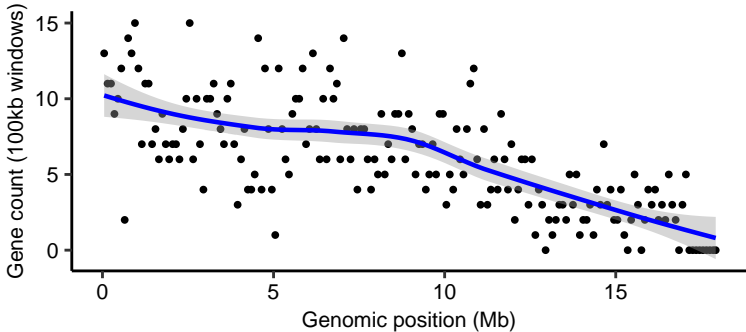

*Vitis vinifera* chromosome 19

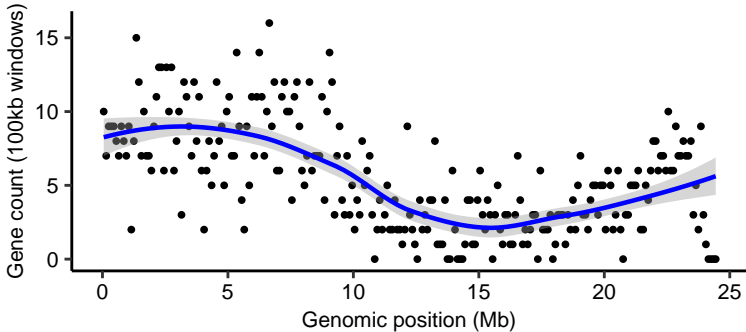

*Vitis vinifera* chromosome 2

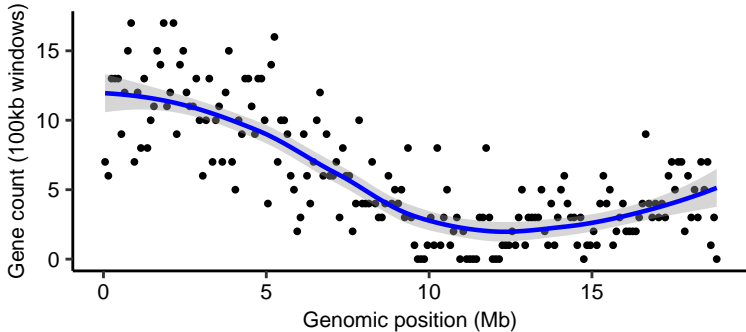

### *Vitis vinifera* chromosome 3

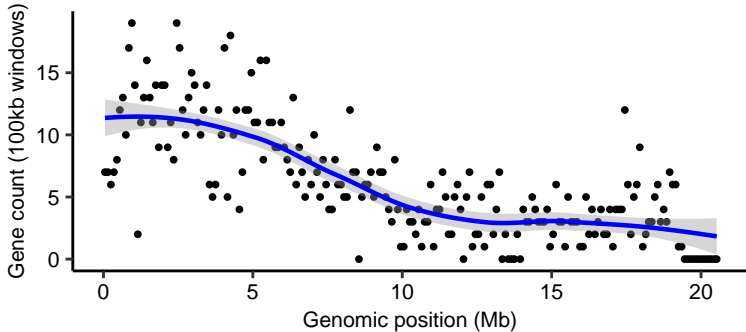

*Vitis vinifera* chromosome 4

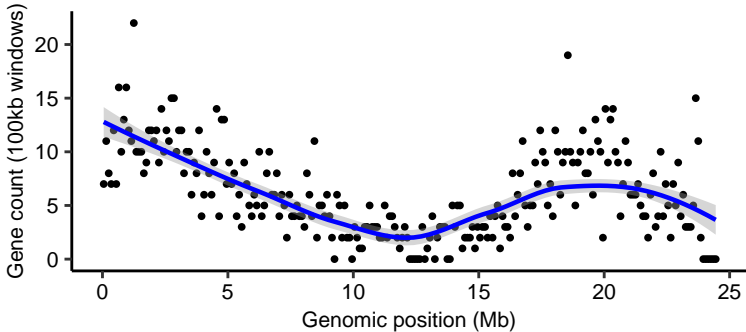



*Vitis vinifera* chromosome 5

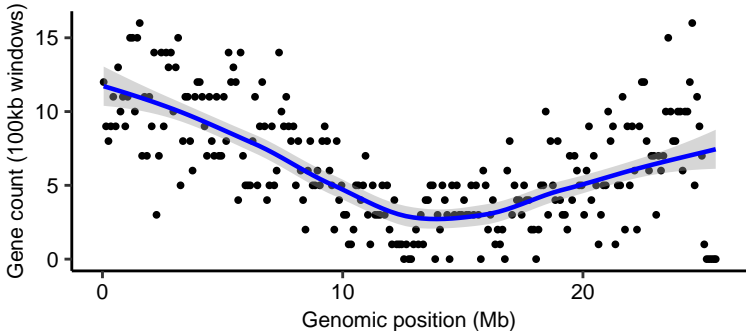

*Vitis vinifera* chromosome 6

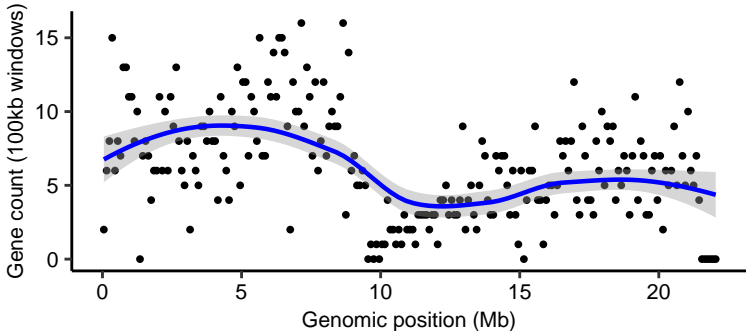

*Vitis vinifera* chromosome 8

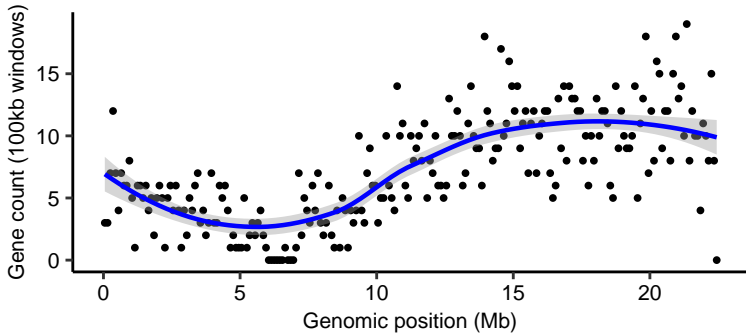

*Vitis vinifera* chromosome 9

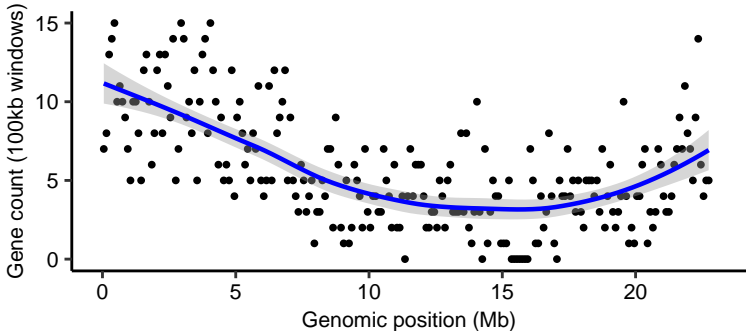

# *Zea mays* chromosome 1

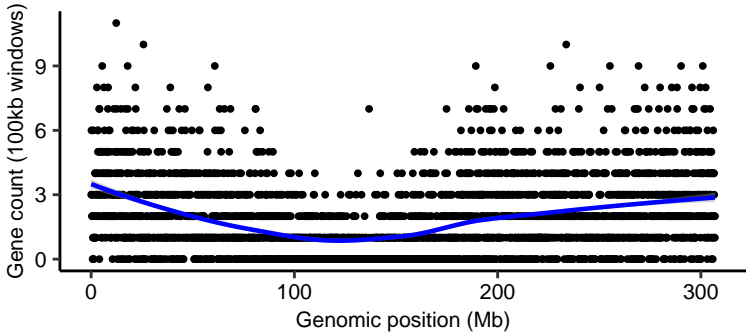

# *Zea mays* chromosome 10

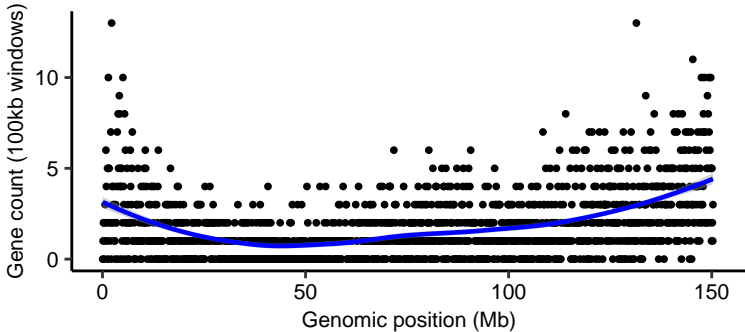

# *Zea mays* chromosome 2

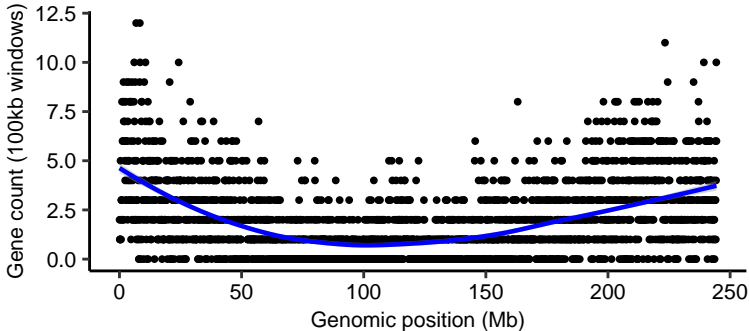

### *Zea mays* chromosome 3

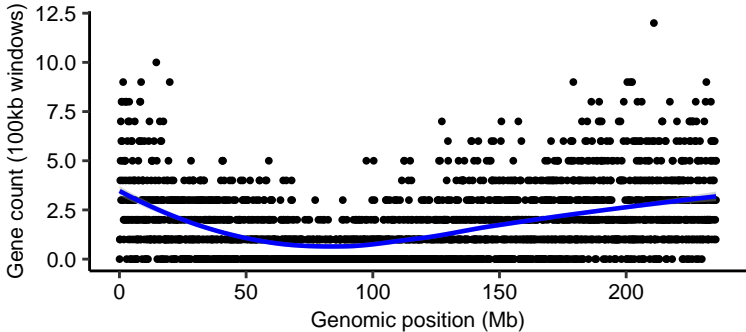



# *Zea mays* chromosome 4

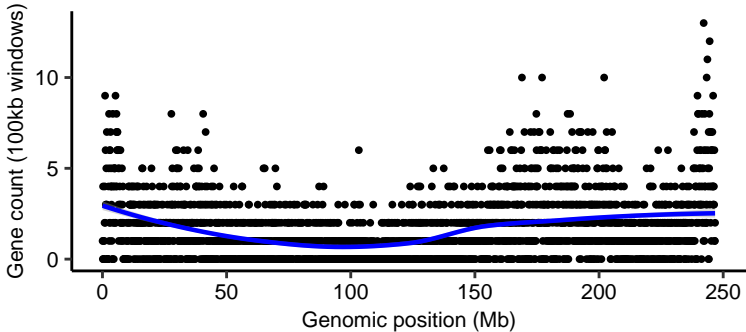



# *Zea mays* chromosome 6

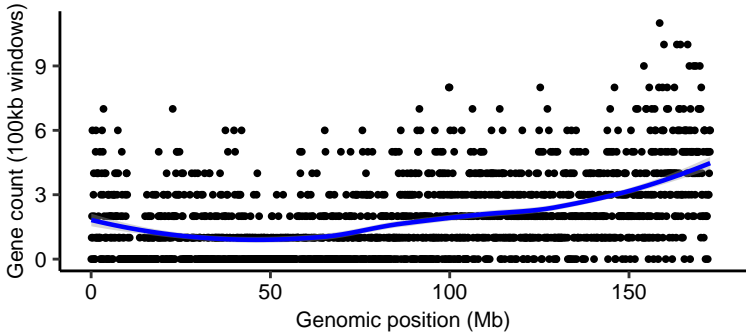

# *Zea mays* chromosome 7

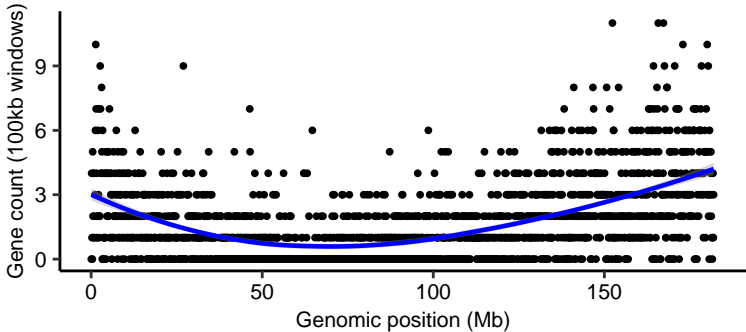

# *Zea mays* chromosome 8

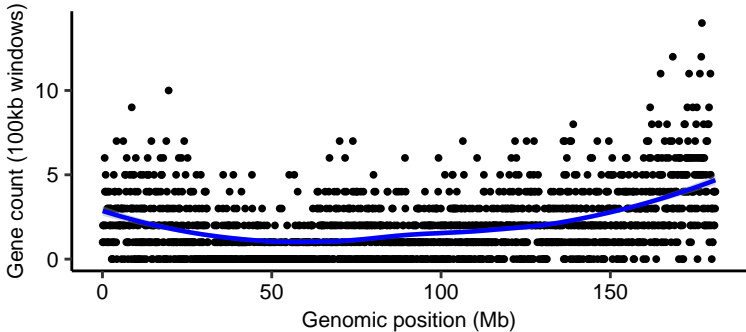

# *Zea mays* chromosome 9

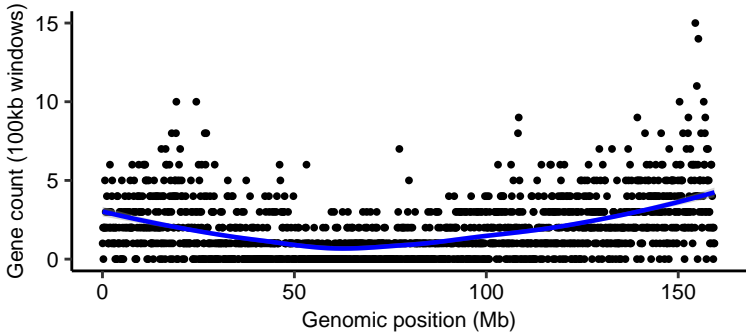

Supplement: pgen.1010141.s011.pdf [file pgen.1010141.s011.pdf]
