# Supplementary material for: Diversity and determinants of recombination landscapes in flowering plants
Source: PubMed Central journal article supplement (PMC9467342; doi:10.1371/journal.pgen.1010141), 2022-08-30
Supplement: pgen.1010141.s027.pdf [file pgen.1010141.s027.pdf]

|                                                                                                                                                                                                                                                                                                                                                                                                                                                                                                          |                                                                                                                                                                                                                                                                                                                                                                                                                                                                                                                                                                                                                                                                                                                                                                                                                                                                                                                                                                                                                                                                                                                                                                                                                                                                                                                                                                                                                                                                                                                                                                              |
|----------------------------------------------------------------------------------------------------------------------------------------------------------------------------------------------------------------------------------------------------------------------------------------------------------------------------------------------------------------------------------------------------------------------------------------------------------------------------------------------------------|------------------------------------------------------------------------------------------------------------------------------------------------------------------------------------------------------------------------------------------------------------------------------------------------------------------------------------------------------------------------------------------------------------------------------------------------------------------------------------------------------------------------------------------------------------------------------------------------------------------------------------------------------------------------------------------------------------------------------------------------------------------------------------------------------------------------------------------------------------------------------------------------------------------------------------------------------------------------------------------------------------------------------------------------------------------------------------------------------------------------------------------------------------------------------------------------------------------------------------------------------------------------------------------------------------------------------------------------------------------------------------------------------------------------------------------------------------------------------------------------------------------------------------------------------------------------------|
| <b>Manuscript Number:</b>                                                                                                                                                                                                                                                                                                                                                                                                                                                                                | PGENETICS-D-22-00286R1                                                                                                                                                                                                                                                                                                                                                                                                                                                                                                                                                                                                                                                                                                                                                                                                                                                                                                                                                                                                                                                                                                                                                                                                                                                                                                                                                                                                                                                                                                                                                       |
| <b>Full Title:</b>                                                                                                                                                                                                                                                                                                                                                                                                                                                                                       | Diversity and determinants of recombination landscapes in flowering plants                                                                                                                                                                                                                                                                                                                                                                                                                                                                                                                                                                                                                                                                                                                                                                                                                                                                                                                                                                                                                                                                                                                                                                                                                                                                                                                                                                                                                                                                                                   |
| <b>Short Title:</b>                                                                                                                                                                                                                                                                                                                                                                                                                                                                                      | Recombination landscapes in angiosperms                                                                                                                                                                                                                                                                                                                                                                                                                                                                                                                                                                                                                                                                                                                                                                                                                                                                                                                                                                                                                                                                                                                                                                                                                                                                                                                                                                                                                                                                                                                                      |
| <b>Article Type:</b>                                                                                                                                                                                                                                                                                                                                                                                                                                                                                     | Research Article                                                                                                                                                                                                                                                                                                                                                                                                                                                                                                                                                                                                                                                                                                                                                                                                                                                                                                                                                                                                                                                                                                                                                                                                                                                                                                                                                                                                                                                                                                                                                             |
| <b>Section/Category:</b>                                                                                                                                                                                                                                                                                                                                                                                                                                                                                 | Evolution                                                                                                                                                                                                                                                                                                                                                                                                                                                                                                                                                                                                                                                                                                                                                                                                                                                                                                                                                                                                                                                                                                                                                                                                                                                                                                                                                                                                                                                                                                                                                                    |
| <b>Keywords:</b>                                                                                                                                                                                                                                                                                                                                                                                                                                                                                         | meiotic recombination; crossover pattern; Marey map; genetic shuffling; comparative genomics                                                                                                                                                                                                                                                                                                                                                                                                                                                                                                                                                                                                                                                                                                                                                                                                                                                                                                                                                                                                                                                                                                                                                                                                                                                                                                                                                                                                                                                                                 |
| <b>Abstract:</b>                                                                                                                                                                                                                                                                                                                                                                                                                                                                                         | <p>During meiosis, crossover rates are not randomly distributed along the chromosome and their location may have a strong impact on the functioning and evolution of the genome. To date, the broad diversity of recombination landscapes among plants has rarely been investigated and a formal comparative genomic approach is still needed to characterize and assess the determinants of recombination landscapes among species and chromosomes. We gathered genetic maps and genomes for 57 flowering plant species, corresponding to 665 chromosomes, for which we estimated large-scale recombination landscapes. We found that the number of crossing-over per chromosome spans a limited range (between one to five/six) whatever the genome size, and that there is no single relationship across species between genetic map length and chromosome size. Instead, we found a general relationship between the relative size of chromosomes and recombination rate, while the absolute length constrains the basal recombination rate for each species. At the chromosome level, we identified two main patterns (with a few exceptions) and we proposed a conceptual model explaining the broad-scale distribution of crossovers where both telomeres and centromeres play a role. These patterns globally correspond to the underlying gene distribution, which affects how efficiently genes are shuffled at meiosis. These results raised new questions not only on the evolution of recombination rates but also on their distribution along chromosomes.</p> |
| <b>Additional Information:</b>                                                                                                                                                                                                                                                                                                                                                                                                                                                                           |                                                                                                                                                                                                                                                                                                                                                                                                                                                                                                                                                                                                                                                                                                                                                                                                                                                                                                                                                                                                                                                                                                                                                                                                                                                                                                                                                                                                                                                                                                                                                                              |
| <b>Question</b>                                                                                                                                                                                                                                                                                                                                                                                                                                                                                          | <b>Response</b>                                                                                                                                                                                                                                                                                                                                                                                                                                                                                                                                                                                                                                                                                                                                                                                                                                                                                                                                                                                                                                                                                                                                                                                                                                                                                                                                                                                                                                                                                                                                                              |
| <p><b>Financial Disclosure</b></p> <p>Enter a financial disclosure statement that describes the sources of funding for the work included in this submission. Review the <a href="#">submission guidelines</a> for detailed requirements. View published research articles from <a href="#">PLOS Genetics</a> for specific examples.</p> <p>This statement is required for submission and <b>will appear in the published article</b> if the submission is accepted. Please make sure it is accurate.</p> | <p>SG received fundings from the Agence Nationale de la Recherche (ANR HotRec ANR-19-CE12-0019-04). The funders had no role in study design, data collection and analysis, decision to publish, or preparation of the manuscript.</p>                                                                                                                                                                                                                                                                                                                                                                                                                                                                                                                                                                                                                                                                                                                                                                                                                                                                                                                                                                                                                                                                                                                                                                                                                                                                                                                                        |

### Unfunded studies

Enter: *The author(s) received no specific funding for this work.*

### Funded studies

Enter a statement with the following details:

- Initials of the authors who received each award
- Grant numbers awarded to each author
- The full name of each funder
- URL of each funder website
- Did the sponsors or funders play any role in the study design, data collection and analysis, decision to publish, or preparation of the manuscript?
- **NO** - Include this sentence at the end of your statement: *The funders had no role in study design, data collection and analysis, decision to publish, or preparation of the manuscript.*
- **YES** - Specify the role(s) played.

\* typeset

### Competing Interests

Use the instructions below to enter a competing interest statement for this submission. On behalf of all authors, disclose any [competing interests](#) that could be perceived to bias this work—acknowledging all financial support and any other relevant financial or non-financial competing interests.

This statement **will appear in the published article** if the submission is accepted. Please make sure it is accurate. View published research articles from [PLOS Genetics](#) for specific examples.

The authors have declared that no competing interests exist.

**NO authors have competing interests**

Enter: *The authors have declared that no competing interests exist.*

**Authors with competing interests**

Enter competing interest details beginning with this statement:

*I have read the journal's policy and the authors of this manuscript have the following competing interests: [insert competing interests here]*

\* typeset

This statement is **required** for submission and **will appear in the published article** if the submission is accepted. Please make sure it is accurate and that any funding sources listed in your Funding Information later in the submission form are also declared in your Financial Disclosure statement.

**Data Availability**

Authors are required to make all data underlying the findings described fully available, without restriction, and from the time of publication. PLOS allows rare exceptions to address legal and ethical concerns. See the [PLOS Data Policy](#) and [FAQ](#) for detailed information.

A Data Availability Statement describing where the data can be found is required at submission. Your answers to this question constitute the Data Availability Statement and will be published in the article, if accepted.

Yes - all data are fully available without restriction

**Important:** Stating 'data available on request from the author' is not sufficient. If your data are only available upon request, select 'No' for the first question and explain your exceptional situation in the text box.

Do the authors confirm that all data underlying the findings described in their manuscript are fully available without restriction?

**Describe where the data may be found in full sentences. If you are copying our sample text, replace any instances of XXX with the appropriate details.**

- If the data are **held or will be held in a public repository**, include URLs, accession numbers or DOIs. If this information will only be available after acceptance, indicate this by ticking the box below. For example: *All XXX files are available from the XXX database (accession number(s) XXX, XXX).*
- If the data are all contained **within the manuscript and/or Supporting Information files**, enter the following: *All relevant data are within the manuscript and its Supporting Information files.*
- If neither of these applies but you are able to provide **details of access elsewhere**, with or without limitations, please do so. For example:

*Data cannot be shared publicly because of [XXX]. Data are available from the XXX Institutional Data Access / Ethics Committee (contact via XXX) for researchers who meet the criteria for access to confidential data.*

*The data underlying the results presented in the study are available from (include the name of the third party and contact information or URL).*

- This text is appropriate if the data are owned by a third party and authors do not have permission to share the data.

All data available to reproduce the results presented in the paper will be available in a public data repository ( <https://github.com/ThomasBrazier/diversity-determinants-recombination-landscapes-flowering-plants.git>).



|                                           |                                                                                                                                                                                  |
|-------------------------------------------|----------------------------------------------------------------------------------------------------------------------------------------------------------------------------------|
| * typeset                                 |                                                                                                                                                                                  |
| Additional data availability information: | Tick here if the URLs/accession numbers/DOIs will be available only after acceptance of the manuscript for publication so that we can ensure their inclusion before publication. |

## Response to reviewers

Dear editor,

We thank you and the three anonymous reviewers for giving us the opportunity to improve and resubmit our manuscript and we are pleased to submit a revised version of our manuscript.

The reviewers have contrasted views. Reviewers 2 and 3 are very positive, and we thank them for their positive feedback. In contrast, reviewer 1 doesn't call into question the validity of our results but has concerns about the general interest and originality of the work, and the lack of clear questions addressed in the manuscript. Although we disagree with her/him about the lack of novelty and interest (see also reviewers 2 and 3), we acknowledge that we didn't stress and explain it sufficiently and that the work was framed in a somewhat too loose way. Most of reviewer 1's concerns were already addressed or partly addressed in the manuscript but not clearly enough for the reader. In this revised version we thus pay particular attention to be more explicit on hypotheses, to clearly stress the novelty of the dataset, approach, and results, and to sharpen and streamline the text.

About the novelty of work, we would like to insist on the originality and the quality of the dataset compared to what was done so far. First, we almost doubled the number of species compared to Haenel et al. 2018 (which was the largest dataset in plants before). Second, we started from raw data (genetic and physical distance between markers) to rebuild Marey maps and inferred recombination maps with the same standardised pipeline. So our work is a new analysis using published datasets but not a meta-analysis as in Haenel et al. 2018, where heterogeneous information was collected and combined, and mostly inferred from figures (*"For the vast majority of species (>90%), CO information suitable to this study was available in graphical form only."*, p2483). Third, by an extensive literature survey, we also gathered cytological information to more precisely locate centromeres. This allowed us to perform detailed analyses that were not carried out before (ex: identifying patterns, testing the different models, measuring genetic shuffling). We briefly stress this in the introduction: *"So far, the number of studied species remained limited and, as plant genomes are highly diverse in many ways (Pellicer et al., 2018; Soltis et al., 2015), the expected diversity in recombination landscapes may have been overlooked (Gaut et al., 2007). In addition, previous studies where meta-analyses combining heterogeneous datasets (ex: mix of inferred data from graphics, final processed data and only a few raw datasets in Haenel et al. 2018) without a standard way to infer recombination maps, which prevented detailed comparison among many species."*

In this revised version, we also address the reproducibility issues raised by reviewer 3 and consider all specific comments of the three reviewers, especially to

improve the clarity of the method and results sections and the aesthetics and readability of figures.

With this revised version we hope that we have addressed all comments and issues raised by the three reviewers and that the manuscript is now suitable for publication in PLoS Genetics. Below we provide detailed answers to reviewers' comments.

Thomas Brazier and Sylvain Glémin

## Reviewer #1

It is now possible to analyse genetic and physical maps of organisms, as the literature now contains suitable data from multiple species. This manuscript analyses such data from larger numbers of plant species than previous studies (55 species, 5-26 chromosomes per species), and describes results for the broad-scale recombination landscapes. However, it does not actually use the analyses to ask interesting questions, which I had hope to see. Some questions might include the following.

**We respectfully disagree with the general comments that we didn't address some of the interesting questions listed below. However we acknowledge that we didn't clearly stress them and framed the work with sufficiently clearly identified questions. We have extensively rewritten the introduction to make them appear clearly and below we answer each specific question.**

Do chromosome arms have an obligate crossover? How often do chromosome arms have multiple crossovers, versus a single one (as I believe is the case in *C. elegans*)?

**We already answered these questions in the previous version in figure 1A, figure 2B and through the formal model selection (Figure 6; Table 1). We also discussed them in the discussion about the species basal recombination rate, that the smallest chromosome of the genome had between one and two CO, independently of its genomic size. However we agree that it could have appeared diluted among other results. In the current version, (i) we directly ask the question in the introduction: "*What is the range of COs per chromosome observed in plants?*", (ii) we annotated the number of COs on isolines in**

**Figure 1A, and (iii) we more explicitly describe the results “Less than 2% of chromosomes had less than one CO ( $n = 11$ ). 234 chromosomes had between one and two COs, suggesting that a single CO per chromosome is sufficient, though 419 chromosomes had more than two COs.”**

Do related species differ (this is an important question, as it relates to the question of whether genetic recombination is sometimes selectively favoured, leading to higher crossover numbers than required for correct segregation, and for repair mechanisms to occur). This question is discussed near the very end of the text, but is not mentioned as a question earlier, making it appear that the ms is entirely descriptive. The ms does not seem to mention that some of the species studied are close relatives, and that this can be helpful in studying such questions.

**We discussed the potential selective advantage of recombination by raising the question of the potential advantage to recombine more in gene-rich regions and what would be the optimal distribution of COs along the chromosome. However, we preferred not to introduce it as a main question of the article as the dataset and the approach is not appropriate to study it properly. We have too few closely related species to properly test for the evolution of recombination rates. At the angiosperms scale, we showed that the phylogenetic effect is mainly due to the differences of chromosome size between species (the phylogenetic model did not perform better than the mixed effect model with a species random effect without phylogenetic structure). We precise it in the results section “*the introduction of phylogenetic covariance did not improve the mixed model thus we did not retain a phylogenetic effect”*. In general, closely related species do not differ in recombination rates but they do not differ in chromosome size either.**

How large are pericentromeric regions with low recombination rates in plants, and how much do they differ between related species?

**We answered the first question in figure 4 and figure S2. And as said above, we do not have an appropriate sampling to properly analyse differences among related species.**

Do selfers have higher recombination rates per physical length of chromosome than closely related outcrossers?

**As for previous questions, our dataset is not appropriate for this specific question. We would need either more pairs of closely related selfing and outcrossing species or a larger dataset to perform an angiosperm wide phylogenetic regression analysis. Actually, out of curiosity we had already done this analysis before and the effect was not significant. As it was a side analysis and because we already had many results we decided not to present it.**

Are recombination rates the same in male versus female meiosis? This is finally mentioned in line 574, but it is not made clear until then that the data analysed are sex-averaged rates.

**It is indeed a really interesting question. Unfortunately, as discussed line 596 (first draft version), we do not have enough sex-specific data to study it (in general, only sex-averaged genetic maps are provided). We indicated more clearly in the introduction and results that we have only sex-averaged genetic maps: “we have estimated the sex-averaged rate of COs along chromosomes. (...) We retrieved publicly available data for sex-averaged linkage maps”**

Instead, the ms presents rather dull statistical analyses. The results have value, but they appear mainly to confirm findings that were already well established, and the ms does not make very clear what new findings now emerge, or show what we can now understand from the results that was not already known. More than once in the text “new insights” are claimed, but it is difficult to find them, partly because of the length of the text, which is also long-winded and repetitive in several places. These problems could be ameliorated by outlining in the Introduction what questions the authors set out to study. As written, this section gives the impression that their aims were purely descriptive, which is not an encouragement to read the text. The ms also tries to interest the reader by making claims to novelty, rather than describing some interesting questions. For example, I feel that it is too strong to say that “the broad diversity of recombination landscapes among plants has rarely been investigated... and the diversity of the resulting landscapes among species and chromosomes still need[s] to be assessed“, although a formal comparative genomic approach may be new and valuable. A further value from analysing more species is that exceptions to accepted generalisations may be detected, and this study did produce a few examples of such exceptions. Overall, I doubt that readers need a length Introduction to tell them that recombination patterns are interesting in relation to evolution, including evolution of patterns in genomes, such as regions with different repetitive sequence density, and consequently gene density, and with differences in GC content. A shorter Introduction could give a better idea of what is new from this study.

**As mentioned above, we agree that the novelty and the strength of this work could have been diluted in the manuscript. So we streamlined the introduction (for ex we removed some general statements) and now stress the main questions addressed in this study: “Thanks to this dataset we addressed the following questions. What is the range of COs per chromosome observed in plants? Is the distribution of COs shaped by genome structure (i.e. chromosome size, telomeres, centromeres) and if so is there a universal pattern? Since recombination hotspots have been found in gene regulatory sequences so far, are recombination landscapes generally associated with gene density? What are the consequences of recombination heterogeneity on the extent of genetic shuffling? Overall, we found that recombination**

***landscapes in plants are more diverse and more complex than initially thought.*** We also tried to be clearer on what is novel and what is confirmatory.

At least several of the conclusions are just confirmations of what was already known. The following examples illustrate this problem, and my comments also include some other issues for some of them (a recurring problem throughout the text is poor writing, including long-winded writing that makes the meaning hard to understand, and I provide some examples in my 'Minor comments' below, but these are still important comments that require revisions of the text, ...

**We extensively revised the text to simplify the writing and we hope it is clearer now.**

...including a suggestion that some species may have too little information to be used. It would be helpful to show the numbers or markers mapped in Figure 4. In addition, if the numbers are small, presumably the total genetic map lengths are unreliable, and it is not explained prominently whether any attempt was made to check for this problem.

**During dataset assembly, we checked the coverage of linkage maps with the difference between raw total linkage map length and the corrected total linkage map length. We estimated the corrected total linkage map length with two different methods: Chakravarti et al. (1991) and Hall and Willis (2005) and chose to report only the more sophisticated method of Hall and Willis (2005) in the manuscript. We added our conclusions to the Results: *“Corrected linkage map length didn't change the total linkage map length (mean difference = 1.19 cM, max difference = 5.62 cM), giving confidence in the coverage of the linkage map”.***

**Moreover, we used different metrics to assess the quality of Marey maps during the filtering step (e.g. marker density, mean interval between markers, largest gap, percentage of the total chromosome size covered by the linkage map, genome coverage, i.e. the difference between map length in Mb and chromosome size from the fasta file) and they were useful to automatically reject a large proportion of dataset (57 dataset retained among 120 dataset gathered; 52 % of dataset discarded). We did not keep every chromosome of a dataset and discarded 17 chromosomes among the retained dataset. The quantitative criteria were adjusted by iterative trials until we found a consistent dataset, and finally their values were:**

- Exclude chromosomes with less than 50 markers**
- At least one marker every 4 cM on average**

- Exclude maps with gaps larger than 20 cM, as they could be falsely detected as recombination peaks (the value seems large, but smaller values were extremely stringent)
- Final visual assessment to exclude undetected suspicious maps (11 chromosomes among 6 species) or to make the choice to keep maps outside criteria (19 chromosomes among 9 species).

Moreover, it is important to note the strong qualitative improvement of our dataset compared to Haenel et al. (2018). They kept chromosomes with at least 20 markers (50 for us with a few exceptions at 30, so 50% to 150% higher) . As explained above, they mixed Marey maps with recombination landscapes, hence mixing different methods of estimation. Many of their linkage maps or recombination maps were figures that were digitised to interpolate an approximate markers' positions or recombination rates in segments, potentially limiting their spatial resolution (in both cM and Mb). They mixed sex-averaged maps with sex-specific ones (or an average of them). On the contrary, we made the effort to search only for tabular data to get the exact genetic and physical position of markers, and we had to ask many authors to provide their maps (as they were not always in supplementary materials). We did the effort of mapping markers on reference genomes as much as possible (if physical positions were not provided or if a more recent assembly version was available, when we had the markers' sequences). We mapped markers' positions on a reference genome for 14 datasets. We implemented a pipeline for the Marey map approach to get as much as possible consistent and reproducible estimates (e.g. automatic tuning of smoothing, bootstrapped confidence interval) so they could be compared between species, despite the inherent heterogeneity of our dataset.

## References

Hall, M. C. & Willis, J. H. Transmission Ratio Distortion in Intraspecific Hybrids of *Mimulus guttatus*. *Genetics* 170, 375–386 (2005).

Chakravarti, A. A graphical representation of genetic and physical maps: The Marey map. *Genomics* 11, 219–222 (1991).

1. “We observed that the bias towards the periphery was not ubiquitous across species” and “Only a subset of species, especially those with larger chromosomes, exhibited a clear bias”. These conclusions are quite similar to that of Haenel et al. (2018) that a distal bias is “universal for chromosomes larger than 30 Mb” (note the incorrect English “concluded to a distal bias”). The main advance seems to be that this study finds that *Nelumbo nucifera* and *Camellia sinensis* are exceptions to this pattern, with the highest recombination rates found in the middle of their chromosomes.

**We corrected the English “concluded” by “assessed”.**

**Though we get similar conclusions, we did more than identifying two exceptions. We identified a second pattern that Haenel et al. didn't detect. Haenel et al. (2018) described and conceptualised only the distal pattern (34 species in our study) but they didn't suggest anything for species not following this pattern. Thus we identified 22 species as exceptions to the Haenel et al. model (16 species sub-distal and 7 species as exceptions). We classified *N. nucifera* and *C. sinensis* in the sub-distal instead of distal, despite their large chromosome size, thus suggesting that the Haenel model is not so universal, as they claimed. We also stated that a fraction of species do not follow any of the two patterns we described (7 species, e.g. *A. thaliana* or *C. rubella*), suggesting that the diversity of patterns may be more important than we thought (and there is room for a more extended sampling in the future).**

The result is described in a rather unhelpful manner, without taking chromosomes morphology into account. The text states that, for larger chromosomes, crossovers tend to occur (not “accumulate”) at the ends of chromosome, while the central regions have less. However, this would be correct only for metacentrics, and the centres of chromosome presumably means centromeric and pericentromeric regions, but this is not made clear. It is also not made clear that these are completely recombination-free regions.

**We changed “accumulate” by “occur”.**

**Most chromosomes in our dataset are metacentric or sub-metacentric, which make it difficult to discern a difference between the physical centre (midpoint) and the centromere. When we used the term centre/central, we meant the midpoint of the chromosome. Otherwise we used centromeric/pericentromeric where appropriate.**

**We stated in the results that the centromere was a recombination free region (line 384 in the original draft). *“When the centromere position was known, we qualitatively observed that the centromeres had an almost universal local suppressor effect (Figure 3). In small and medium-sized chromosomes, the recombination was often suppressed in short restricted centromeric regions (several Mb) displaying drastic drops in the recombination rates, whereas the rest of the map did not seem to be affected. In larger chromosomes, the suppression of recombination extends to large regions upstream and downstream of the physical centre of the chromosome (approximately 80-90% of the chromosome; Figure 4).”***

**We discussed more the limits of having mostly metacentric chromosomes: *“this work suggests that centromeres do not only have just a local effect but they also influence the symmetry of recombination landscapes over long distances, though a large proportion of our sample is metacentric, which might***



***limit the detection of an effect. (...) However, how centromeres (especially non-metacentric ones) may affect CO distribution at larger scales still needs to be determined.***

The extent of a larger pericentromeric region (meaning, the extent of the wider region surrounding or adjacent to the centromere) is known to vary greatly between species, but it is not well described in the ms, and only examples are shown, with rather subjective criteria to define the different regions. It would, in principle, be possible to define them less subjectively, though this might not be easy. At least, it would be good to mention whether this was attempted. A further problem is that regions are shown in figures, rather than tables giving estimates of genome region sizes and recombination rates, and as relative sizes are often used, it is difficult to understand what sizes of pericentromeric regions (for example) are found in plants.

**We mainly provide figures in the main text as we think it is clearer for the reader to get the main results. However, we also provide many quantitative data in tabular form in supplementary material. We also provide scripts and all Marey maps that will be available on the MareyMap online website. So it should be easy to retrieve quantitative information if needed.**

It is also not a new discovery that low recombination regions tend to have low gene density. The Discussion acknowledges this, but it is strange to first describe this as if it is a new result, only to later mention that it is not. If the Introduction had laid out some questions, this could be avoided. Problems like this also make the text longer than necessary.

**We hope we now go more directly to the point. In the introduction we ask: “Since recombination hotspots have been found in gene regulatory sequences so far, are recombination landscapes generally associated with gene density?” We also mention in the results section that we follow previous studies: “At a fine scale, it has been shown in a few species that COs preferentially occur in gene promoters. The scale of 100 kb used here is too large to directly test whether this is a common pattern shared among angiosperms. Instead, like in Haenel et al. (2018), we assessed whether recombination increased with gene density.”**

2. Recombination is unevenly distributed in genomes. Therefore one should not write that “We showed that” this is the case. One can write “We confirmed that” (or something similar). This text also uses vague terminology “how genetic variation is shuffled during meiosis”, but the word recombination already exists, so it would be better to be precise. If at some point the meaning is gene conversion, this should be used. However, I think that the text mentions conversion only in passing, and it is not considered seriously.

**We changed “showed” by “confirmed”.**

**We don't clearly see the point here. We think that it is pretty clear that we are studying crossover rates, and we have no data to analyse gene conversion. In addition gene conversion cannot shuffle genes except in the close vicinity to recombination points. Following Veller et al. 2019 we measured the effect of a CO on gene shuffling at the whole chromosome scale. However, we are open to suggestions to improve the message if we have misunderstood this comment.**

In line 538, I am not sure why the word "prediction" is used (In addition to the role of centromeres, we also observed a departure from the prediction that recombination rates should decrease with the distance to the tip of the chromosome, showing that the distal model is not generally found among plants). Is this really a prediction, or are you trying to say that you did not confirm the view that this pattern is shared by all plants? If so, references are needed to assertions that all plants share this pattern.

**We removed the word "*prediction*" and used a more clear statement: "*In addition to the role of centromeres, we also observed that recombination rates do not always decrease monotonically with the distance to the tip of the chromosome...*"**

The Discussion section need not repeat so much of the results. It might also mention that recombination rates vary between individuals of the same species, including from the effects of rearrangements, especially inversions, so it would be good to mention that the data are currently often from just a single maternal and paternal parental individual of each species (for selfers, perhaps just a single parental individual). Hotspots should also be mentioned, if only to make clear that this study did not attempt to detect them.

474 It is proposed that in angiosperms crossovers may be initiated in gene regulatory sequences, and it is suggested that this "sheds new light on the evolution of recombination landscapes", but without saying what new light is shed, other than this suggestion. The suggestion is not evaluated further, and I did not understand if it is a speculation, based on the correlation between recombination and gene density mentioned in this paragraph (or on some other observations). However, based on later text (line 613), I suspect that the intended meaning is that the results are consistent with such a proposal that was already published by others.

**We rewrote the sentence in a more explicit way: "*This sheds new light on the evolution of recombination landscapes and whether the distribution of COs is optimal for the efficacy of genetic shuffling.*" We hope it is clearer now. [Note that the complete sentence was "*This sheds new light on the efficacy of genetic shuffling and the evolution of recombination landscapes.*" so we already mentioned the efficacy of genetic shuffling]**

However, as the correlation must be strongly affected by the lower gene densities in genome regions with low recombination rates, which lead to accumulation of transposable elements and other repetitive sequences, it would seem difficult to disentangle this from the suggested mechanism. Line 628 states that “The positive association of COs and gene regulatory sequences, including fine-scale correlations, appears more robust”, which is too vague. It seems unlikely that the effect is stronger than the very marked and consistent effect of low recombination rates on repetitive sequence density (although of course different elements are involved in different cases).

**We removed this statement. “~~The positive association of COs and gene regulatory sequences, including fine-scale correlations, appears more robust (Choi et al., 2013; He et al., 2017; Marand et al., 2019), but causality mechanisms of these multiple interactions still need to be clarified.~~”**

Regions with high recombination rates may, however, allow patterns in crossover localisation to be detectable, and I believe that this has been studied, for example in maize (e.g. papers by Dooner and colleagues) and also in *Mimulus guttatus* (see the paper by Hellsten et al. cited above). Line 621 finally mentions the problem of other correlated factors. I think that the authors should revise their text so that it does not first set up an untestable idea and then mention that it is untestable. Instead, it will be preferable to set up some interesting questions early in the text, tell readers what is currently known, and then describe analyses that help understand things better than before.

Dooner, H., & He, L. (2008). Maize genome structure variation: Interplay between retrotransposon polymorphisms and genic recombination. *Plant Cell*, 20(2), 249-258. doi:10.1105/tpc.107.057596

Fengler, K., Allen, S. M., Li, B., & Rafalski, A. (2007). Distribution of genes, recombination, and repetitive elements in the maize genome. *Crop Science*, 47(Supplement), S-83-S-95.

Yao, H., Zhou, Q., Li, J., Smith, H., Yandea, M., Nikolau, B. J., & Schnable, P. S. (2002). Molecular characterization of meiotic recombination across the 140-kb multigenic a1-sh2 interval of maize. *Proceedings of the National Academy of Sciences of the USA*, 99, 6157-6162.

Tenaillon, M. I., Sawkins, M. C., Anderson, L. K., Stack, S. M., Doebley, J. F., & Gaut, B. S. (2002). Patterns of diversity and recombination along chromosome 1 of maize (*Zea mays* ssp. *mays* L.). *Genetics*, 162, 1401-1413.

**We think that even in regions with high recombination rate it can be difficult to identify the precise locations of CO with the Marey map approach, especially in large genomes as in maize, unless the size of the genetic mapping population**

is very large as in the recent study in *A. thaliana*. Otherwise LD maps should be more appropriate.

To be more constructive and less vague on this point, we now add that the use of recombination maps at finer scale will help resolving the role of genic regions in shaping recombination landscapes: ***“Causality mechanisms of these multiple interactions still need to be clarified. The use of fine scale recombination maps (using very large mapping populations or LD maps) should help identifying the respective role of genic regions (especially the role of promoters) and transposable elements (or other genomic features)”***.

Another comment that applies throughout the text is that recent papers are cited for concepts and understanding that are not new. In such cases, the text should make clear that the citation is to a review paper. For example, the text gives the impression that Marand et al. (2019) discovered that gene density and recombination rates are both correlated with transposable elements (meaning densities of transposable elements). This has been known for a long time, and was reviewed in 1994 by Charlesworth et al. (Nature, 371, 215-220. doi:10.1038/371215a0).

**Citations have been changed accordingly.**

In first mentioning heterochiasmy, it seems strange not to mention whether the papers cited refer to plants or just to studies in animal species. It is explained later that Melamed-Bessudo et al. (2016) showed that it is not universal in plants, but the text does not explain what the term might mean in plants, and that hermaphrodites may have different crossover patterns in male and female meiosis, so readers may be puzzled.

**We rephrased to indicate when we were talking specifically of plants, and when we were referring to a more universal pattern shared by plants and animals. We also define heterochiasmy when we first used the word.**

3. Similarly, I was surprised to read that “We were intrigued to notice that [within species] the chromosome-wide recombination rate is proportional to the relative size of the chromosome”. I was under the impression that this was already known.

**We changed the wording: *“Chromosome length drives the basal recombination rate for each species, though ~~but we were intrigued to notice that within species the chromosome-wide recombination rate was proportional to the relative size of the chromosome~~”***.

However, we think it was not already known that the size effect was species specific (this is why it's the relative size effect that seems to be general). We obtained this result because we gathered a dataset of chromosome-scale recombination landscapes, analysed them on a per chromosome level and modelled a species random effect; it has not been done before to our knowledge. In the two previous meta-analyses, Stapley et al. (2017) data were restricted to genome-wide recombination rates, and Haenel et al. (2018)

**averaged their chromosome-wide recombination rates to a genome-wide level in similar analyses (one point per chromosome).**

It is illustrated in Figure 2D, which shows the new results, which are potentially interesting, as they relate to the question of how often arms have multiple crossovers. This figure analyses the excess of crossovers, defined as the linkage map length minus the 50 cM expected if one crossover per arm is obligate), and shows that it correlates positively with the chromosome' physical sizes divided by the average chromosome size for the species, which they term the "relative chromosome size". Such an effect is not a new result.

**As explained above, what we think is novel is that there is no single relationship between absolute chromosome size and CO but possibly a single and general one with the relative chromosome size. So the qualitative pattern was known but we think that its quantification was not. We added this precision in the corresponding result part: *"More concretely, it means that two chromosomes having the same ratio of size will have the same ratio of excess of recombination rate, whatever the species and the genome size"*.**

**In the discussion, we also tried to better explain this point: *"However, there is no universal relationship between the absolute size of a chromosome and its mean recombination rate. Although the average recombination rate of a species is well predicted by its average chromosome size, the recombination rates of each chromosome separately are not well predicted by their absolute chromosome size. Instead, variation within species is much better explained by the relative chromosome size, and surprisingly, this relationship seems to be roughly the same among species (see Figures 1 and 2)."***

However, as I understand it, an obligate crossover is expected on each arm. If so, the number of excess crossovers, in addition to this one, should be analysed per arm. Even if my recollection about this is incorrect, the text should make clear what is known from previous studies, and why the present study uses chromosome, not arm, lengths. Line 136 mentions that the centromeric index was known for the chromosomes of 37 species, but then it remains unclear how these data were used, and also whether results can be used from the species where no such data were available. Line 285 mentions that recombination rates were negatively correlated with the distance to the nearest telomere, which seems to suggest that metacentrics may have been analysed as such, but I could not see this clearly explained.

**We explained earlier in the main text that one CO seems to be sufficient (at least for some species) [*"Less than 2% of chromosomes had less than one CO (n = 11). 234 chromosomes had between one and two COs, suggesting that a single CO per chromosome is sufficient, though 419 chromosomes had more than two COs"*] so we think it's clearer why we used linkage map length minus 50 cM. In addition we showed later that the model with one mandatory CO per arm is not well supported statistically.**

Line 300 states that that (in my wording) the centromere regions almost universally showed low recombination rates, but this is not completely clear in Figure 4, where large low recombination rate regions in several species, for example *Vigna unguiculata*, appear not to overlap the centromeres. If this is a real biological observation, the statement seems incorrect.

**We completed the statement with new results quantifying this effect “Ninety percent of chromosomes (388 chromosomes) had significantly less recombination than the chromosome average at the centromeric index (n = 425, resampling test, 1,000 bootstraps, 95 % confidence interval). 81 chromosomes (19 %) were completely recombination-free in the centromere. However, the transposition of centromere position from cytological data to genomic data may be imprecise or wrongly oriented for some chromosomes. After orienting chromosomes to map the centromeric index, 16 % of chromosomes (70 over 425) had a recombination rate higher in the inferred centromere position than on the opposite side, thus a centromere potentially mapped on the wrong side. Of these 70 chromosomes, the difference between inferred and opposite centromere position was less than 1 cM/Mb for 64 % of them (n = 45).”**

Given these possible problems with the data, I was not convinced of the value of the formal modelling analysis of the effect of the centromere in suppressing recombination, and the comparison with less simple models that suggest that telomeres may also affect patterns. Such effects are plausible, but I feel that some of these plant data do not add valuable and solid support.

**We feel that this criticism is somewhat unfair. The initial simple telomere-led model has been proposed on the basis of visual observations based on species average and on the correlation between periphery-bias ratio and chromosome length on 16 animal and 11 plant species. This is a very useful starting point but it was clearly proposed as a conceptual model by the authors (their Figures 3 and 4). Here we think we go beyond this by formally testing the model and proposing alternative ones with a much larger dataset and taking individual chromosome patterns into account. We are aware of the possible noise in the data but if some centromeres are not correctly located (opposite side for example) this should go against model 3 and removing those chromosomes didn't change the results. So we think our results are robust.**

Another weakness is the lack of any mention of differences between male and female meiosis, and another is the lack of any mention of outcrossing rates.

**In the first version we already discussed the difference between male and female meiosis. We made it clearer that we have only sex-averaged genetic maps and that we didn't analysed sex-specific maps. Note that in the recent paper of Sardell and Kirkpatrick (Am Nat 2020, sex differences in the recombination landscapes), only five plant species are available. However we**

**kept the idea in the discussion as it is indeed an interesting hypothesis to explain the observed patterns.**

**As explained above, the dataset is not appropriate to test for the effect of the mating system.**

I wondered why these papers were not cited, or other papers about *Arabidopsis lyrata* or *helleri*, which may have genetic map information.

Hellsten, U., Wright, K. M., Jenkins, J., Shu, S., Yuan, Y., Wessler, S. R., . . . Rokhsar, D. S. (2013). Fine-scale variation in meiotic recombination in *Mimulus* inferred from population shotgun sequencing. *Proceedings of the National Academy of Sciences of the United States of America*, 110(48), 19478–19482.  
doi:10.1073/pnas.1319032110

Kawabe, A., Hansson, B., Forrest, A., Hagenblad, J., & Charlesworth, D. (2006). Comparative gene mapping in *Arabidopsis lyrata* chromosomes 6 and 7 and *A. thaliana* chromosome IV: evolutionary history, rearrangements and local recombination rates. *Genetical Research*, 88, 45-56.

Hansson, B., Kawabe, A., Preuss, S., Kuittinen, H., & Charlesworth, D. (2006). Comparative gene mapping in *Arabidopsis lyrata* chromosomes 1 and 2 and the corresponding *A. thaliana* chromosome 1: recombination rates, rearrangements and centromere location. *Genetical Research*, 87(2), 75-85.  
doi:10.1017/S0016672306008287

**They are interesting papers. However the first one focuses on fine-scale crossover patterns and CO hotspots, especially around genic regions and does not provide a chromosome scale map (actually not possible with the method they used). The others could have been used but they did not match our filtering criteria.**

Minor problems with the English, or vague wording or unclear statements

1. In English, it should be “correlated with” (not “to”).

**Corrected.**

2. The word ‘drive’ should be avoided, as it is very vague. For example, the meaning is not clear in the phrase “Chromosome length drives the basal recombination rate for each species”

**We changed to “*Chromosome length constrains the basal recombination rate for each species*”**

3. In line 182, it should read “regression lines for species with at least 5 chromosomes mapped, 5-26 chromosomes per species, 55 species).

**Corrected according to the reviewer's comment.**

4. Line 232 Genomic distances (Mb) were scaled between 0 and 1 (divided by chromosome size) to compare chromosomes with different sizes.

**We are sorry but we don't understand what is the issue here.**

5. It is difficult to make out the meaning of the text starting in line 247. I think it means the following: "Each chromosome was divided in (it should read "into") ten bins, each one 10th of the chromosome's total physical size." The relative recombination rate is the log-transformed ratio of the expected relative genetic length (one tenth, presumably of the total genetic length) divided by the observed relative genetic length of the bin (presumably meaning the proportion of the total genetic length represented by the physical region in question. Values below zero correspond to recombination rates lower than expected under a random distribution of crossovers across the physical chromosome. Also difficult to understand "Chromosome sizes (Mb) on the left correspond to each broken stick chromosome" — maybe it means "each chromosome". Also (in line 244) "Relative recombination rates along the chromosome were estimated in ten bins using the broken stick model.

**To avoid confusion, we used another representation by dividing chromosomes in ten bins of equal genomic size, computing the average recombination rate in each bin and dividing by the mean recombination rate to get a relative measure. We also reordered the species as a function of chromosome size instead of recombination heterogeneity.**

6. In English, one needs to say "divided into" (not "in"). Also "pooled into" (although this reads awkwardly in English, and line 140 might be better as "the Spearman rank correlation coefficient correlation between the values for 1 Mb windows and those for the 100 kb windows within them was ....").

**Corrected according to the reviewer's comment.**

7. The word "linkage" in genetics means that the variants are linked. It should be distinguished from "linkage disequilibrium" (LD), which refers to associations between two or more linked variants. Line 57 should be corrected, as the text refers to the latter, but uses the former ("Recombination... breaking the linkage between neighbouring sites and creating new genetic combinations"). The sites remain linked, but not in LD. The sentence is also confusing by adding "upon which selection can act", because selection acts on single variants, and the authors are trying to say that new genetic combinations might be more (or less) favoured by selection than the non-recombinant combinations (in other words, the different variants may interact in their effect on fitness).

**We changed "*breaking the linkage*" into "*breaking linkage disequilibrium*".**



**We also write now: “making selection more efficiently” to avoid possible confusion.**

8. It is a sweeping statement to say that “Plant genomes contain large regions with suppressed recombination”, depending strongly on how many plants have good data on physical and genetic maps, so line 92 ought to mention the number on which this is based, and give readers at least a rough idea of what is meant by “large”. There is no need to add the obvious remark that this impacts genomic averages ( in addition “impact” is the wrong word, as the meaning is that it affects the average — of course the average depends on the values in all genome regions that are included in the data, so it is not worth saying explicitly).

**As genome sizes vary over many orders of magnitude in plants (10 to > 1000 Mb), “large” is very species dependent. It varies from a few Mb in smaller genomes (genomes between 10 and 30 Mb) to hundreds of Mb in larger genomes (500-1000 Mb), and the proportion of genome without recombination ranges from a few percent to 80%. We clarified the sentence (added the range of values and proportions) “*Plant genomes contain large regions with suppressed recombination in various proportions (from a few Mb to hundreds of Mb, > 1-75 %),...*”.**

**We suppressed the statement about the average recombination rate.**

9. Phrases that are unnecessary (such as “it seems that” in line 93, should be pruned out, so that the text is easier to read. There are quite a few such instances, and I do not comment on all of them. The beginning of the Results section, for example, could be written more briefly and clearly.

We retrieved publicly available data for linkage maps and genome assemblies, to obtain genetic map distances and physical distances. We used linkage maps with marker positions in chromosome-level genome assemblies (except for *Capsella rubella*, which had a high-quality scaffold-level assembly of pseudo-chromosomes). After filtering based on the marker numbers, densities, and genome coverage, and after filtering out the outlying markers (maybe meaning outlier markers by a criterion that needs to be explained), we produced 665 Marey maps (reference needed) for 57 species (2-26 chromosomes per species); marker numbers per chromosome (or perhaps the authors mean per species, in which case perhaps some species have too little information to be used) ranged from 31 to 49,483.

**We thank you for this example of paragraph and we tried to follow this advice throughout the manuscript. Note that the minimum of markers is 30 per chromosome and not per species as mentioned above.**

## Reviewer #2

In this paper, the authors seek to decipher genomic patterns of recombination across a large (57 species) dataset of sequenced plant genomes coupled with genetic maps. Their meta-analyses lead to several novel observations.

I thoroughly enjoyed reading this manuscript, and I congratulate the authors on a really fine paper. It will be, in my view, a very welcome addition to the literature. In the surest sign of flattery, I'm a jealous that I did not think of doing such a neat analysis.

**We thank reviewer 2 for this very positive comment.**

Accordingly, I have only minor comments that the authors may wish to address in revision. Most of the comments are very minor, indeed. They are offered both as an attempt to clarify the few areas of the text that I found difficult to digest and probably out of an abundance of enthusiasm for this work. I leave it to the authors to decide if my suggestions offer improvements or are better ignored...

Minor Comments:

- Line 48 – Unlike most of the rest of the paper, I found this sentence hard to read and digest. Reword, rework or shorten? Btw I'd use "in" instead of "to" ("in the production")

**We splitted the sentence for clarity.**

- Line 79 – This last sentence of the paragraph is really indirect and therefore pretty tough to read. I'm not really sure what manipulations are being considered here... Rewrite?

**We rewrote the sentence: *"The characterization of recombination landscapes also has practical interests as variation in meiotic genes could be used to experimentally manipulated CO patterns for advantageous purposes, such as redirecting recombination towards regions of interest for crop breeding (Kuo et al., 2021)".***

- Line 100 – as a reader, I found that a better link between the two sentences on this line could have been helpful. Maybe something as simple as "Haenel et al. considered chromosome length, found blah blah blah and suggested a simpler telomere-led model. That model included a universal bias..."

**We rewrote it more directly: *"They found that larger chromosomes have low crossover rates in their centre and suggested a simple telomere-led model with a universal bias of COs towards the periphery of the chromosome, positively driven by chromosome length."***

- Line 118 – I'd use "about" instead of "on"

**Changed for "about"**

- Line 125 – If this is reasonable, I'd love to see the filter characteristics hinted at here, even though there is a good description in the methods. That is something like "... marker density (at least 50 per chromosome), genome coverage (blah blah)"

**To avoid weighting the main text too much we preferred referring to the method part for details. However, we can add more details here if needed.**

- Line 701 – I'm a bit confused by the what was done when marker sequences were not available and also how many species fell into this category. I'm not concerned at all – this is a careful study – but it'd be nice understand better.

**When marker sequences were not available for mapping on the most recent genome assembly, genomic positions were those of the original publication (precisions now added to the M&M). "*We remapped markers on the reference genome for 14 species for which genomic positions were not known or were mapped to an older assembly*".**

- Figure 2 – It might be helpful to have X-axis say "Mean chromosome size" where appropriate (e.g., Figure 2C and B). The legend is very clear, though.

**The X-axis has been changed accordingly.**

- I love Figure 3. It blows my mind how consistent the patterns are between the dashed lines (genome wide) and an individual chromosome. It is bizarre and neat and thought provoking. It might be nice to report mean chromosome size (in the legend or in the figure), given that the species are ordered in that matter. It just makes me curious...

**Mean chromosome size has been added to the title of each figure.**

- Figure 4, since patterns seem to correlated with mean chromosome size, would it be worth adding that value after each species name? As a reader, it would help me to see the pattern and better digest the text from ~lines 213 to 227 and figure 5a, etc).

**We added the mean chromosome size after species name and colored each species as the function of three patterns identified later. We also reordered species as a function of mean chromosome size.**

- Figure 5A – this may make the graph too crowded, but it'd be nice to be able to compare dots in 5A to figure 4. So, it'd be nice to have the dots labelled. If that is too much, the authors might want to consider labelling a few species (e.g., the six in figure 3 or some of the species mentioned in lines 220 to 227). Personally, I'd love to know what the outliers are in this graph!

**Figure 5A has been annotated with a subset of species (the 6 in figure 3 and a few species mentioned in lines 220 to 227 or seen as outliers).**

- Lines 284 and following. It'd be nice to cite Figure 6A and Figure 6B separately after the word descriptions of the patterns.

**We added references to Figure 6A and Figure 6B in the text.**

- Line 296. I could not figure out what the "species correlation" referred to. Sorry if I missed this, but it's worth another look to be sure it is clear.

**We changed the formulation: "*the correlation between recombination and the distance to the nearest telomere was significantly higher for species with larger chromosomes*".**

- I'm kind of shocked that M3 is favored over M2, as isn't one CO per arm necessary for mechanism? Hence, I'd a priori predict  $M2 > M3$ . I don't think this contrast is explicitly discussed in the Discussion (e.g., lines 523 to 536), but I think it should be.

**To our knowledge, it was not very clear if one CO per arm or per chromosome was necessary. It seems that CO assurance imposes one CO per chromosome, not per arm, in many species. For example, a recent study by Dukic and Bomblies in *Arabidopsis arenosa* observed a large proportion of chromosomes undergoing a single CO, while only 25/30% of bivalents contained at least two COs. Indeed, we observed less than two COs in many chromosomes, especially the smaller chromosomes within species (Figure 1). Besides, even if M2 fit well for a bunch of chromosomes (7 species over 37 species support M2), the model is not applicable for many other chromosomes just because at least one arm has less than 1 CO (length < 50 cM). To mitigate this effect, we subset only species with chromosomes having at least one CO per arm (26 species over 37) and M3 was still a better model than M2. However we must say that we do not have the perfect sampling to categorically exclude M2 or M3, because most of our chromosomes are metacentric, thus a low power to distinguish M2-M3.**

- Figure 8: It'd be nice if the legend clearly stated which graph is which. I think Figure 8b is the distal recombination pattern, but I'm not 100% sure. It'd be great to have sample sizes on the graph too ( $n = 34$  or 16 species, I think).

**We now give an explicit legend; (a) distal pattern vs (b) sub-distal pattern. We also added to the figure sample sizes and an annotation for distal/sub-distal patterns**

- It's pretty clear in the M&M, but on line 419, it might be nice to mention that  $r_{intra}$  is a single value per chromosome. On my first reading, I was thinking it was some sort of transformation of cM between genes...

**We now explicitly mention that  $r_{intra}$  is a single value per chromosome: "*The  $r_{intra}$  gives, for a chromosome, a measure of the probability of a random pair of loci to be shuffled by a crossover.*"**

- The analysis of gene distances is very thought provoking!

**Thanks!**

- Line 488 – What the heck is going on with fungi and animals! It's certainly not necessary, but can the authors provide a quick description or explanation. They have piqued my curiosity.

**Indeed this statement was not very clear; we removed this comparison with animals and fungi as it was not important to discuss our results. For your information, we were referring to the fact that linkage map length does not depend on the absolute chromosome size (Figure 2A). Stapley et al. (2017) showed that genome-wide linkage map length does not depend on total genome size in plants, in contrast to fungi and animals. It is possible that CO interference is stronger in plants than in animals and fungi, as it would explain why linkage map length remain stable across a large span of genome sizes, though it is not very clear to make the link with our results because Stapley et al. (2017) relies on genome-averaged values.**

Again, I do not consider any of my comments to be critical for publication, and I want to again congratulate the authors on a thorough and interesting study.

## Reviewer #3

This manuscript by Brazier and Glémin uses a comparative approach to investigate variation in recombination landscapes in flowering plants. Their study used genetic map data from 665 chromosomes in 57 species of angiosperms. At the whole chromosomal level, they found a negative correlation between chromosome size and recombination rate (cM/Mb) with a strong species-specific effect. They also found that CO excess on chromosomes was more correlated with their relative size to other chromosomes in the genome rather than their absolute size, and that this effect was consistent across species. When investigating crossover landscapes, they found that landscapes were similar within species but strongly varied between species. CO rates were not uniform across chromosomes and were often more likely to occur at the distal ends of the chromosomes, with larger chromosomes tending to have a higher “periphery bias” of COs. However (as with most things in nature), this general pattern did have a number of exceptions. The authors then investigated the joint effect of telomeres and centromeres on CO distribution, finding the strongest support for a model that incorporated the effects of the telomere, centromere and one CO per chromosome. The authors found that recombination rate increased with gene density. Finally, the authors showed that genetic shuffling was positively correlated with linkage map length, and that there was a small negative effect of the periphery-bias ratio. These effects were slightly higher when modelling genetic shuffling in terms of gene distances. Whilst the investigations here are largely correlative rather than revealing mechanisms, this study provides a useful foundation for further investigation of broad drivers of recombination rate and landscape variation across a wide range of taxa.

This paper is the most comprehensive and well analysed that I have read on this topic, and generally it is well-written and well structured, particularly the introduction and discussion. I'm impressed by the sheer breadth of analyses.

**We thank reviewer 3 for his/her very positive comment.**

Nevertheless, **there are parts of the methods & results that lack clarity**, which in turn leads to issues with reproducibility. In particular, a lot of the statistical models are not well described – model structures should be made explicit in the methods and/or results, rather than providing a general text for statistical analyses at the end of the methods. I would emphasise that providing code and data (where possible) would improve these issues.

**Thank you for pointing this out. We addressed this issue by providing more information in the results and M&M sections. The chosen statistical models are explicitly written. Besides, the R code used for statistical analysis will be freely available in a public github repository. Marey maps will be available in the**

same github repository and in an updated version of the MareyMap Online database.

I had many comments and suggestions - those marked \*\* should be addressed by the authors in a revised version.

## ABSTRACT/INTRODUCTION

Lines 32-33: The authors should be clearer what they mean by “relative size” here (i.e. relative to the rest of the genome) and why this result is interesting.

**We substantially modified this part of the abstract and hope it is clearer now: “We found that the number of crossing-over per chromosome spans a limited range (between one to five/six) whatever the genome size, and that there is no single relationship across species between genetic map length and chromosome size. Instead, we found a general relationship between the relative size of chromosomes and recombination rate, while the absolute length constrains the basal recombination rate for each species”. We also substantially rewrote the rest of the abstract and hope it clarifies and sharpens the message.**

Lines 48-52: In the first sentence, I would add the term “crossing-over” or “crossover” here to set up the rest of the introduction. In the second sentence, I would briefly define landscape (i.e. variation in recombination rate along the chromosomes)

**Crossover and the definition of recombination landscapes have been added to the first sentences.**

Lines 61 – 63: Indicate that you are defining assurance in this sentence.

**Crossover assurance has been added to the sentence. “at least one CO per chromosome is mandatory (i.e. crossover assurance) to achieve proper segregation and to avoid deleterious consequences of nondisjunction”**

Line 73: Can the authors briefly mention how recombination landscapes shape the distribution of TEs?

**We mentioned “the accumulation of TEs in regions of low recombination”**

\*\*Lines 98 – 100: I found this statement confusing, as I can’t understand how independence between linkage map length and genome size means that recombination rates will be higher in smaller genomes. I also can’t make the link between this statement and the Stapley paper – I think they found that linkage map lengths were smaller in smaller genomes, but also that chromosome number explained more variation (i.e. increased chromosome number lead to longer maps

due to a higher minimum bound of recombination due to crossover assurance). Perhaps I am wrong, but regardless, it might be worth double-checking this statement and explaining it more clearly.

***“Recombination rates are supposed to be higher in smaller genomes because the linkage map length is independent of genome size”***. Since the total linkage map length do not depend on the total genome size, we can assume that smaller genomes will have roughly the same linkage map length as larger genomes, thus the same number of COs is distributed among a smaller genomic size (Mb) and recombination rate is higher (cM.Mb<sup>-1</sup>). Stapley et al. (2017) made a similar statement in Box 1. ***“Following the observation that linkage map length was similar across eukaryotes despite large variation in genome size, it was proposed that larger genomes have several orders of magnitude lower recombination rates.”*** In their Figure 3 Stapley et al. show that linkage map length increases linearly with genome size, though in plants the best fit was a quadratic function. Accordingly, in plants, larger genomes have roughly the same linkage map length than smaller ones. Indeed, they also stated that chromosome number explained more variation than genome size.

We rephrased the statement accordingly to the reviewer’s comment: assertion is true in plants, not other eukaryotes, and the number of chromosomes is more important than genome size:

***“In plants, contrary to other eukaryotes, recombination rates are supposed to be higher in smaller genomes because the linkage map length is independent of genome size and the number of chromosomes explain more variation than genome size (Stapley et al., 2017).”***

Line 100: on recombination rate, or landscape? Or both?

**Actually, both. We added to the phrase: “existence of a major broad-scale determinant of CO distribution and frequency” to be more explicit.**

\*\*Line 102: Based on your argument here, it is not clear how chromosome length links to biases of CO towards the peripheries – please clarify.

**We clarified the argument. “Haenel et al. (2018) found that larger chromosomes have low crossover rates in their centre and suggested a simple telomere-led model with a universal bias of COs towards the periphery of the chromosome, positively driven by chromosome length”**

Line 117: Briefly define genetic shuffling and why it’s interesting – could even be mentioned earlier e.g. around lines 56 – 58.

**We added precision on the expected effect of CO patterns on genetic shuffling in line 117. “how CO patterns affect the extent of genetic shuffling”**



**We modified lines 56-58 to define genetic shuffling. “*creating new genetic combinations transmitted to the next generation upon which selection can act, i.e. genetic shuffling*”**

**We added explicit precisions in results. “*In most cases, genetic shuffling were slightly higher when gene distances were used instead of base pairs (Figure 10; mean = 0.22 for base pairs; mean = 0.26 for gene distances; Wilcoxon rank sum test with continuity correction,  $p < 0.001$ ), implying that the genetic shuffling was more efficient among coding regions than than among regions randomly sampled in the genome*”**

## RESULTS

\*\*Lines 130 – 132: I don’t think this is described in the methods. Is there information on the number of progeny? I was curious about this but couldn’t find the information in the supplementary tables.

**We added a new column with the number of progeny (retrieved in the original publication of the genetic map) in supplementary table S1 Dataset Metadata.**

Line 143: This header could be interpreted that smaller chromosomes have more crossover events rather than more crossovers per unit length. Perhaps “Smaller chromosomes have higher recombination rates than larger ones”?

**The header was modified accordingly.**

\*\*Lines 153 – 169: Where are the methods for this LMER and what is the model structure? Is this what is being described in lines 831 – 850 of the methods? Throughout the paper, it needs to be clearer what models were run and what their fixed & random effect structures were in order to better interpret them.

**Models’ equations are now explicitly mentioned in the results section for each model presented.**

Line 155: Does this mean that there is no/low phylogenetic signal of recombination rate?

**We do not have a proper sampling to study the evolution of recombination rates along the phylogeny, with uneven sampling amongst angiosperms (many close relatives in monocots, sister species in *Brassica* sp., *Oryza* sp. or *Arachis* sp.). Though the phylogenetic mixed model (pglm, phyr package, see method for details) assessed a phylogenetic signal (34% of the variance explained by random effects was due to a phylogenetic signal), we suspect it was mainly attributed to differences of chromosome size between monocots and eudicots (monocots with mainly large genome and eudicots with a higher**

proportion of small genomes) and uneven sampling. When we add both phylogenetic effect and chromosome size, we saw that the phylogenetic mixed model did not perform better than a more parsimonious linear mixed model with a species effect without phylogenetic covariation (Table S5).

Figure 1: This figure is busy. A suggestion for panel A: perhaps the dashed lines could be fit from axis to axis, to visually demarcate the 1 – 4CO expectations a bit better? For panel B, since this is the same data plotted twice, perhaps only the regression lines need to be visualised here rather than all of the points.

**We modified the figure to improve its readability. We hope it is better now:**

**Figure 1A. Dashed lines are now solid thin lines, going axis to axis and more easily identified. Lines were identified by the expected number of CO directly on the figure. Regions with less than one CO or more than four COs were labelled.**

**Figure 1B. We removed points, according to the reviewer's comment, for better visualisation of regression lines.**

\*\*Figure 2: I found this figure confusing. Some suggested edits:

Panel A could be wider to allow discerning of the slopes. I also struggled to understand what the isolines on the graph are showing even after reading several times. When using isolines, perhaps there is a need to define their values (as in Figure 1) – or perhaps they can be removed if making things too busy.

Panel B: I cannot interpret what this is showing – are there really lines in panel A that have intercepts of less than zero?

Panels B & C: I am very curious to see the error on these estimates.

Panels B & C: maybe these panels might be better suited in the supplementary?

Panel D: Again, very busy. Perhaps use of transparency of points or lines could make things clearer.

**We understand the confusion on figure 2. Panel B has been removed since it did not support important findings. Panel C has been moved to supplementary materials (Figure S4). Panel A is now wider. We added transparency to points to make regression lines more distinguishable.**

**The genome wide recombination rate (cM/Mb) has been annotated on isolines. They tend to show that within species recombination rates are roughly similar among chromosomes despite differences in absolute chromosome size (because regression lines are parallel to their closest isoline).**

\*\*Figure 4: Accessibility issue for colour-blindness - the red dots may not be visible on the green background. The visual scale for the chromosome size is unclear,

particularly as appears to be log – could there be line traces instead of colours here? Also – perhaps I have misunderstood – but if the chromosomes were split into ten bins, then why does the resolution of recombination rate estimation look to be much higher than 1/10th of the chromosome on the horizontal lines?

**Thank you for pointing this out. Centromere position is now more visible, represented by black and white diamonds (higher contrast).**

**The visual scale of chromosome size is now clearer, with the height of bar plots corresponding to chromosome size. The scale is now linear instead of log. We also ordered species by mean chromosome size. Following reviewer 1's suggestion we also used another way to visualise the results to avoid possible confusion. Chromosomes are now splitted into ten bins of equal genomic sizes, not genetic length. We hope it eases the reading.**

\*\*Line 282 – 298: It seems that chromosome size was a strong correlate of recombination pattern, but I was curious if the authors tested other factors to rule out potential artefacts (e.g. differences in marker density) or to identify other biological correlates, such as ploidy? Was there a phylogenetic signal of this distal vs subdistal pattern?

**We tested several factors, such as number of markers, marker density (cM & Mb) or number of progeny, that had no effect. Out of curiosity we also previously checked for possible effects of ploidy, lifespan and mating systems. None was significant. Note that our sampling is not appropriate to properly test these effects (see answer to reviewer 1). If required we can add such analyses in supplementary material.**

Figure 6: There is a lot of text to wade through in the legend - it would help the reader to put annotations, sample sizes, key on the figures to allow for faster interpretation. For example, putting A: Distal pattern, N = XX, B: Subdistal pattern, N = XX on the panels make it easier to interpret. The dashed lines for the unclassified patterns are very distracting – why not include this as another panel, or put it in the supplementary material? Panel C is tiny and needs a key, or at least x-axis labels. I like the schematics of the crossover distributions but it's so tiny – perhaps include this as its own figure as it explains the model really well.

**Annotations were added to the figure to reduce the legend (i.e. pattern, sample size). Unclassified patterns were removed, since they are specific patterns and they are also directly accessible in supplementary Figure S6.**

**X-axis labels were added to panel C.**

**Figure 6 was splitted. Figure 6D was moved to a new figure.**

Figure 7: A & B. There needs to be a higher contrast between the colours as it's difficult to see the differences between blue and black. C. What do the colours

represent here? Adjusting the point transparency and slight x jitter may improve the visualisation here.

**Figure 7A & B. The contrast was increased.**

**Figure 7C. We removed colours because they are not informative on this graph and do not contribute to the main message. Colours represented species (each species had its own relationship recombination rate ~ gene count) but it was difficult to distinguish them. The distribution of specific relationship recombination rate ~ gene count is already presented in Figure 7A. We added a slight jitter.**

Figure 8: Same as Figure 6 – annotating the panels would be helpful.

**We annotated the panels with the pattern name and the sample size (number of species). We removed the dashed lines for exceptions.**

\*\*Line 414 – I think it's important for the authors to briefly define what genetic shuffling is and why it's interesting to look at from an evolutionary perspective.

**We added a short definition of genetic shuffling. *“Genetic shuffling participates to the random reassortment of genes between parental homologous chromosomes. To quantify how much the genetic shuffling depends on the distribution of COs, we estimated its intrachromosomal component,  $r_{intra}$ , as described in equation 10 in Veller et al. (2019).”***

Line 419: On the same chromosome

**Same answer as for reviewer 2. We explicitly mentioned that  $r_{intra}$  is a single value per chromosome. *“The  $r_{intra}$  gives, for a chromosome, a measure of the probability of a random pair of loci to be shuffled by a crossover.”***

Line 422: less efficient = resulted in less genomic shuffling?

**The sentence was modified according to the reviewer's suggestion, to be more explicit on the effect of COs. *“COs clustered in distal regions are supposed to generate less genetic shuffling than COs evenly distributed in the chromosome.”***

Figure 9: see comments on Figure 7.

**We guess the comment applies better to Figure 10. The contrast was increased by changing the blue colour.**

DISCUSSION

Lines 477 – 488: I'm a little puzzled by some of the statements here, so perhaps clarification is needed. I think it could be mentioned that crossover assurance will give a basal rate per chromosome of 50cM regardless of size, and then the authors can expand how the findings outlined here add to this established fact. Furthermore, I believe that in animals, larger chromosomes do have lower recombination rates within species... if I have misinterpreted this, perhaps the authors need to clarify their point better.

**Indeed this statement was not very clear (see the same comment above); we removed this comparison with animals and fungi as it was not important to discuss our results.**

Line 519: clarify what “association” means here... does chromosome pairing begin at the telomeres?

**Yes it does. The phrase was changed to be more explicit (association replaced by chromosome pairing). “the early chromosome pairing beginning in telomeres is thought to favour distal COs”**

Line 570: put “beam-film” in inverted commas and indicate that you are about to describe it.

**We put ‘beam-film’ in inverted commas. We indicated that we describe the conclusions of Zhang et al. (2014), we do not have results about the ‘beam-film’. “Zhang et al. (2014) assessed that the ‘beam-film’ model is able (...) If clamping is assumed, the model predicts that mechanical stress culminates (...)”**

Line 582 – 583: It depends on the number of gametes measured and how many were male and female, which is easily done in dioecious species. I think authors should specify here “in angiosperms” and iterate here why heterochiasmy is difficult to investigate for the less plant-literate reader.

**We are not sure to clearly understand this suggestion. The offspring generation corresponds to an equal number of males and females meiosis, even if the parents produced different numbers of gametes.**

## METHODS

\*\*Lines 700 – 704: Indicate that this was from cytogenetic data. How is this information orientated correctly to the linkage map/genome sequence?

**We removed the sentence about centromeric indexes, since it was better explained later in methods, in the paragraph “Testing centromere or telomere effects” : “We searched the literature for centromeric indices (ratio of the short arm length divided by the total chromosome length) established by cytological measures. When we had no information about the correct orientation of the chromosome (short arm/long arm), the centromeric index was oriented to**

***match the region with the lowest recombination rate of the whole chromosome (i.e. putative centromere). ”***

**\*\*Lines 709 – 723: I think this paragraph requires a few improvements in reproducibility. Was this all done in the MareyMap package in the next paragraph? What was a ballpark criteria/example for anything that was outside the global trend?**

***At the beginning of the paragraph: “We selected genetic and genomic maps after stringent filtering and corrections, using custom scripts provided in a public Github repository (<https://github.com/ThomasBrazier/diversity-determinants-recombination-landscapes-flowering-plants.git>). ”***

***We specified a qualitative criterion for map selection and quality assessment: “We assumed that markers must follow a monotone increasing function when plotting genetic distances as a function of genomic distances in a chromosome (i.e. the Marey map) and collinearity between the genetic map and the reference genome was required to keep a Marey map.”***

***More details about the correction: “If necessary, genetic maps were reoriented so that the Marey map function is increasing (i.e. genetic distances read in the opposite direction).”***

***We specified criteria for outlier filtering and precisions about the processing: “Markers clearly outside the global trend of the Marey map (e.g. large genetic/genomic distance from the global cloud of markers or from the interpolated Marey function, no other marker in a close neighbourhood) were visually filtered out, and multiple iterations of filtering/interpolation helped to refine outlier removal. ” We previously tried different strategies of automation for this step, as in Mansour et al. (2021), but after many trials, we concluded that it was neither efficient nor reliable for handling heterogeneous datasets. Though it is easy to distinguish clear outliers for human eyes, it is not a trivial task to set an automatic filtering for outliers. Because the noise is highly dataset dependent, one cannot use a constant threshold to exclude outliers. A threshold adjusted for the best map might be too stringent for another dataset, while a threshold set for the worst map might fail to detect the few outliers in almost perfect Marey maps. We tried automatic filtering of outliers based on the distribution of inter-marker distances (between adjacent markers), but user confirmation is required, as for many data-specific tasks. Setting a given threshold of distance or a given distribution statistic (e.g. remove 5% with the greater genetic distance than the maximum extreme value) do not take into consideration the heterogeneity between dataset. Thus, when comparing different dataset relying on very different distributions, we suspect it could introduce a kind of noise-dependent bias. The more noise there is in data, the less stringent filtering will be. Finally, visual assessment and an iterative procedure of filtering/interpolation seemed to be the more robust approach, though we lose in reproducibility. Please note that all outlier markers removed***

are still present in Marey maps provided in supplementary, though they are labelled as 'not valid' and not used in subsequent analyses. This is also a possibility proposed in the MareyMap package in R.

In the next paragraph: **“Local recombination rates along the chromosome were estimated with custom scripts following the Marey map approach, as described in the MareyMap R package (Rezvoy et al., 2007).”**

## References

Mansour, Y., Chateau, A. & Fiston-Lavier, A.-S. BREC: an R package/Shiny app for automatically identifying heterochromatin boundaries and estimating local recombination rates along chromosomes. BMC Bioinformatics 22, 396 (2021).

\*\*Lines 724 – 737: Related to the previous comment, when looking at the plotted Marey maps (Figure S1), are the methods/results affected in any way by the “jitter” of Mb vs cM distances? I imagine that if the markers were not in the correct order in the linkage map (if the local linkage order is ABC, but the real genomic order is ACB), then the cM length of the chromosome may be overestimated, meaning that recombination rates would be consistently inflated. For example, in *Camellia sinensis*, the maps seems to be messier and therefore may accumulate local overestimations in recombination rate that will lead to a longer cM map than the true one, compared to *Arabidopsis* where the orders appear to be highly conserved between the genome and the linkage map. The potential impact of this should be discussed.

**This issue was addressed by automatically adjusting the smoothing parameter of the loess regression to the data, and subsequently by evaluating the performance of interpolation using a bootstrap procedure (random resampling of markers). Due to higher levels of noise in some Marey maps, we certainly lose resolution and miss local variations for those maps, but we are confident that our method did not lead to longer genetic maps (cM).**

**To check for a bias in our estimates (e.g. inflating the chromosome recombination rate), we assessed the differences between the genome wide recombination rate (obtained by dividing the genetic map length by the genome length) and the averaged estimate per chromosome (the mean of recombination rates in windows of 100 kb). Both values are extremely correlated (Spearman’s Rho = 0.99,  $p < 0.001$ ) and the figure below shows that our mean estimates are not biased.**

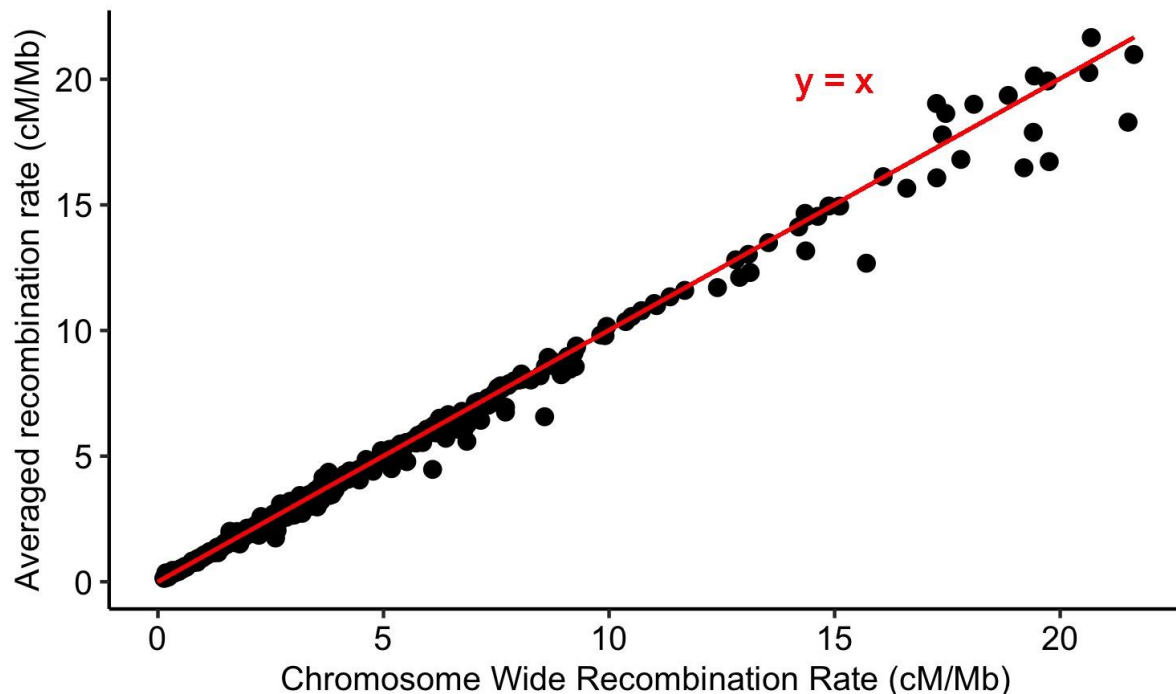

However, we cannot exclude that locally, along the chromosome, some values may reach high values that are not biologically reasonable, false peaks of recombination (i.e. data overfitting). On the other hand, the messier maps, due to stronger smoothing, should lead to a lower resolution and be more limited in the detection of local variation. That is why we implemented a K-fold cross validation procedure to automatically adjust the smoothing to avoid overfitting & underfitting issues. In addition, a bootstrap procedure (1,000 iterations), with random resampling of markers (with replacement), was used to evaluate the sensitivity of our estimates to outliers and noisy data. Recombination landscapes with large confidence intervals, indicating low data quality and/or poor performance of interpolation (precision and reliability), were discarded.

\*\*Lines 738 – 749: Please clarify here how the relative recombination rate is calculated – is this done for each segment? i.e. if the chromosome is 100cM and 80Mb, and the first segment is e.g. 10cM & 20Mb, then how would the value be calculated? The verbal argument is unclear.

The representation of the broken stick model was not intuitive and we modified figure 4. The relative recombination rate is now estimated in 10 bins of constant genomic size and the relative recombination rate is the ratio expected genetic size divided by observed genetic size. In the legend: “*Relative recombination rates along the chromosome were estimated in ten bins of equal genomic size as the observed genetic length divided by the expected*



*genetic length (one tenth of total genetic size) of the bin (log-transformed). Values below (above) zero are recombination rates that are lower (higher) than expected under a random distribution". The verbal argument was made clearer, and the equation was added. "The relative recombination rate in the segment i was estimated by the log-ratio of the observed genetic size divided by the expected genetic size (i.e. fixed to total genetic size / k by the model), as in the following equation.*

$$\text{relative recombination rate} = \log_{10}(\text{genetic}_i / (\text{genetic}_{\text{total}} / k))"$$

In the case suggested by the reviewer, it means that the chromosome is cut into 10 bins of genomic size 8 Mb (80/10). If the first bin (8 Mb) is 20 cM long, the relative recombination rate is:

$$\log_{10}(20 / (100/10)) = \log_{10}(2)$$

\*\*Lines 831 – 850: The way this is written, it isn't connected to any specific models. It is important to describe what was modelled here and to be explicit about the model structures to ensure reproducibility.

We specified more explicitly models in the result section (model formulas are also given in Supplementary Table S5 of model selection). We compared models:

LM response variable ~ explanatory variable

LMER response variable ~ explanatory variable + (1|Species)

LMER response variable ~ explanatory variable + (response variable|Species)

PGLMM response variable ~ explanatory variable + (1|Species\_\_); where Species\_\_ indicates that phylogenetic structure is modelled

After model selection, we chose for all regressions at a chromosome level (samples are chromosomes) the model

LMER response variable ~ explanatory variable + (1|Species)

Since we didn't detect a phylogenetic effect, we chose the model

LM response variable ~ explanatory variable for all regressions at a species level (one point per species, chromosomes pooled).



## 20 Abstract

21 During meiosis, crossover rates are not randomly distributed along the chromosome and  
22 their location may have a strong impact on the functioning and evolution of the genome. To  
23 date, the broad diversity of recombination landscapes among plants has rarely been  
24 investigated and a formal comparative genomic approach is still needed to characterized  
25 and assess the determinants of recombination landscapes among species and  
26 chromosomes. We gathered genetic maps and genomes for 57 flowering plant species,  
27 corresponding to 665 chromosomes, for which we estimated large-scale recombination  
28 landscapes. We found that the number of crossing-over per chromosome spans a limited  
29 range (between one to five/six) whatever the genome size, and that there is no single  
30 relationship across species between genetic map length and chromosome size. Instead, we  
31 found a general relationship between the relative size of chromosomes and recombination  
32 rate, while the absolute length constrains the basal recombination rate for each species. At  
33 the chromosome level, we identified two main patterns (with a few exceptions) and we  
34 proposed a conceptual model explaining the broad-scale distribution of crossovers where  
35 both telomeres and centromeres play a role. These patterns globally correspond to the  
36 underlying gene distribution, which affects how efficiently genes are shuffled at meiosis.  
37 These results raised new questions not only on the evolution of recombination rates but also  
38 on their distribution along chromosomes.

39

40 KEYWORDS: meiotic recombination, crossover pattern, Marey map, genetic shuffling,  
41 comparative genomics

42

## 43 Author summary

44 Meiotic recombination is a universal feature of sexually reproducing species. During  
45 meiosis, crossing-overs play a fundamental role for the proper segregation of chromosomes  
46 during meiosis and for reshuffling<sup>es</sup> alleles among ~~between~~ chromosomes, ~~which increases~~  
47 ~~genetic diversity and the adaptive potential of a species.~~ How much variation in  
48 recombination is expected within a genome and among different species remains a central  
49 question ~~to understand~~ <sup>for understanding</sup> the evolution of recombination. We characterized and compared  
50 recombination landscapes in a large set of plant species ~~that represent~~ <sup>with</sup> a wide range of  
51 **genomic characteristics**. We found that the number of crossing-overs varied little among  
52 species, from one mandatory to no more than five or six crossing-overs per chromosomes,  
53 whatever the genome size. However, ~~recombination can strongly vary within a genome and~~  
54 we identified two main patterns of variation along chromosomes (with a few exceptions) that  
55 can be explained by a new conceptual model where chromosome length, chromosome  
56 structure and gene density play a role. The strong association between gene density and  
57 recombination raised new questions not only ~~on~~ <sup>was already well known, but</sup> <sup>about</sup> the evolution of recombination rates but also  
58 on their distribution along chromosomes.

59

60

## 61 Introduction

62 Meiotic recombination is a universal feature of sexually reproducing species. ~~Through~~  
63 ~~crossovers, new haplotypes are passed on to offspring by the reciprocal exchange of DNA~~  
64 ~~between maternal and paternal chromosomes. However, recombination landscapes — the~~  
65 ~~variation in recombination rate along the chromosome —~~ <sup>s</sup> are not homogeneous across the  
66 genome and vary among species (de Massy, 2013; Haenel et al., 2018; Mézard et al., 2015;  
67 Stapley et al., 2017). Meiotic recombination ~~plays a fundamental functional role by forming~~  
68 <sup>involves</sup> chiasmata at specific pairing sites between homologous chromosomes to ensure the  
69 physical tension needed for the proper disjunction of homologs (de Massy, 2013; Mézard et  
70 al., 2015; Zickler and Kleckner, 2015). Recombination also plays an evolutionary role by  
71 breaking linkage disequilibrium between neighbouring sites and creating new genetic  
72 combinations transmitted to the next generation (~~i.e. genetic shuffling~~), making selection  
73 <sup>on individual genetic variants</sup> more efficient (Barton, 1995; Charlesworth and Jensen, 2021; Otto, 2009). The number and  
74 location of crossovers (COs) along the chromosome are finely regulated through  
75 mechanisms of crossover assurance, interference and homeostasis (Otto and Payseur,  
76 2019; Pazhayam et al., 2021). In most species, crossover assurance is necessary to achieve  
77 proper segregation and to avoid deleterious consequences of nondisjunction, though it is not  
78 very clear <sup>whether</sup> ~~if it is~~ at least one CO per chromosome or per arm <sup>is required,</sup> ~~that is mandatory.~~  
79 COs are also usually regulated through interference, ensuring that they are not too  
80 numerous and not too close to each other (Pazhayam et al., 2021; Wang et al., 2015). In  
81 addition to regulation on a large scale (Cooper et al., 2016; Zelkowski et al., 2019),  
82 recombination is also finely tuned on a small scale. Generally, crossovers are concentrated  
83 in very short genomic regions (typically a few kb), i.e. recombination hotspots. In plants  
84 studied so far, CO hotspots have been found in gene regulatory sequences, and mostly in  
85 promoters (Choi et al., 2018; He et al., 2017; Marand et al., 2019).

86 In addition to meiosis ~~functioning~~, variations in recombination rates ~~have a strong impact~~  
87 ~~on genome structure, functioning and evolution~~ (Gaut et al., 2007; Haenel et al., 2018;  
88 Stapley et al., 2017; Tiley and Burleigh, 2015) and it has become a ~~key~~ challenge to  
89 integrate recombination rate variation in population genomics in the age of 'genomic  
90 landscapes' (Booker et al., 2020; Comeron, 2017). The characterization of recombination  
91 landscapes also has practical interests as variation in meiotic genes could be used to  
92 experimentally manipulate CO patterns for ~~advantageous~~ purposes, such as redirecting  
93 recombination towards regions of interest for crop breeding (Kuo et al., 2021).

94 In plants, recombination rates are ~~supposed~~ <sup>believed</sup> to be higher in smaller genomes because the  
95 linkage map length is independent of genome size and the number of chromosomes explain  
96 more variation than genome size (Stapley et al., 2017). Several broad-scale determinants  
97 have recently been identified, such as chromosome length (Tiley and Burleigh, 2015),  
98 distance to the telomere or centromere (Blitzblau et al., 2007) and genomic and epigenetic  
99 features (Apuli et al., 2020; Marand et al., 2019; Yelina et al., 2012). Plant genomes also  
100 contain large regions with suppressed recombination in various proportions (from a few Mb  
101 to hundreds of Mb, 1 to 75 % of the genome). However, ~~despite these recent advances~~, the  
102 diversity of recombination landscapes in plants still remain to be properly quantified.

103 Recently, a meta-analysis explored large-scale recombination landscapes among  
104 eukaryotes and paved the way for identifying general patterns (Haenel et al., 2018). They  
105 found that larger chromosomes have low crossover rates in their centre and suggested a  
106 simple telomere-led model with a universal bias of COs towards the periphery of the  
107 chromosome, ~~positively driven by chromosome length~~. They also proposed that  
108 chromosome length played the main role in crossover patterning while position of the  
109 centromere had almost no effect (except a local <sup>ly</sup> one). Alternatively, it has also been  
110 proposed that both telomeres and centromeres shape recombination landscapes (Wang and  
111 Copenhaver, 2018) and ~~the universality of a universal pattern among plants has been~~  
112 questioned (Zelkowski et al., 2019). ~~So far, the number of studied species remained limited~~  
<sup>As only a limited</sup> <sup>have been studied</sup>

113 and, as plant genomes are highly diverse in many ways (Pellicer et al., 2018; Soltis et al.,  
114 2015), ~~the expected~~ diversity in recombination landscapes may have been overlooked (Gaut  
115 et al., 2007). In addition, previous studies were meta-analyses combining heterogeneous  
116 datasets (ex: mix of inferred data from graphics, final processed data and only a few raw  
117 datasets in Haenel et al. 2018) without a standard way to infer recombination maps, which  
118 prevented detailed comparison among <sup>s</sup> many species.

119 To overcome these limitations we gathered, **to our knowledge**, the largest recombination  
120 landscape dataset in flowering plants. We started from raw data by combining genetic  
121 mapping from pedigree data and genome assembly ~~up to the chromosome scale~~, from  
~~chromosome scale~~ <sup>ies</sup> ~~up to the chromosome scale~~, from  
122 which we estimated recombination maps – more precisely the sex-averaged rate of COs  
123 along chromosomes – using the same standardised method. ~~Thanks to this dataset we~~  
~~addressed~~ <sup>in all the species, in order to ask</sup> the following questions. What is the range of COs per chromosome ~~observed~~ in  
124 plants? Is the distribution of COs shaped by genome structure (i.e. chromosome size,  
125 telomeres, centromeres) and if so is there a universal pattern? Since recombination hotspots  
126 have been found in gene regulatory sequences ~~so far~~, are recombination landscapes  
127 generally associated with gene density? **What are the consequences of recombination**  
128 **heterogeneity on the extent of genetic shuffling?** Overall, we found that recombination  
129 landscapes in plants are more diverse and more complex than <sup>previously</sup> ~~initially~~ thought. We identified  
130 two main patterns that ~~are parallel to~~, and which may emerge from, the gene density  
<sup>do you mean “accompany”?</sup>  
131 distribution. We showed ~~ed~~ <sup>what?</sup> that **this** globally improves the genetic shuffling of coding regions,  
132 which raises new questions about the evolution of recombination.  
133

134

135

## 136 Results

### 137 Dataset and recombination maps

138 We retrieved publicly available data for sex-averaged linkage maps and genome  
139 assemblies to obtain genetic and physical distances. We selected linkage maps for which  
140 the markers had genomic positions on a chromosome-level genome assembly (except for  
141 *Capsella rubella*, which had a high-quality scaffold-level assembly of pseudo-chromosomes).  
142 We remapped markers on the reference genome for 14 species for which genomic positions  
143 were not known or were mapped to an older assembly. After making a selection based on  
144 the number of markers, marker density, and genome coverage, and after filtering out the  
145 outlying markers (see methods), we produced 665 chromosome-scale Marey maps (plot<sup>S</sup> of  
146 the genetic vs <sup>physical</sup> genomic distance, cM vs Mb) for 57 species (2-26 chromosomes per species,  
147 Table S1, S2, Fig S1, S2). The number of markers per chromosome ranged from 31 to  
148 49,483, with a mean of 956 markers. Corrected<sup>S</sup> linkage map length (Hall & Willis's method)  
149 did not change the total linkage map length (mean difference = 1.19 cM, max difference =  
150 5.62 cM), giving confidence in the coverage of the linkage map (Hall & Willis, 2005). We  
151 verified that neither the number of markers, marker density nor the number of progenies had  
152 a significant effect on the analyses. We also retrieved gene annotations for 41 genomes.  
153 The angiosperm phylogeny was well represented in our sampling (Fig S3), with a basal  
154 angiosperm species (*Nelumbo nucifera*), 15 monocot species and 41 eudicots. From<sup>the</sup>  
155 literature, we also obtained data on the centromeric index for 37 species, defined as the ratio  
156 of the short arm length divided by the total chromosome length (Table S3).

157 From the Marey maps, we estimated local recombination rates along the chromosomes  
158 in<sup>on</sup> non-overlapping 100 kb windows<sup>, and their</sup> with a 95% confidence interval<sup>s</sup> (1,000 bootstraps).  
159 Estimates at a scale of 1 Mb yielded very similar results (the Spearman rank correlation  
160 coefficient correlation between the two estimates was  $\text{Rho} = 0.99$ ,  $p < 0.001$ , Table S4)  
161 therefore only 100 kb landscapes were analysed in the subsequent analyses.



162 Smaller chromosomes have higher recombination rates than larger  
163 ones

164 In agreement with previous studies (Haenel et al., 2018; Stapley et al., 2017), we found a  
165 significant negative correlation between chromosome size (Mb) and the mean chromosomal  
166 recombination rate (Spearman rank correlation coefficient  $Rho = -0.84$ ,  $p < 0.001$ ; log-log  
167 Linear Model, adjusted  $R^2 = 0.83$ ,  $p < 0.001$ ). ~~For most species, there were~~ <sup>had</sup>  
168 and four COs per chromosome ~~even~~ <sup>al</sup> though the genome sizes span almost two orders of  
169 magnitude. ~~Less~~ <sup>Fewer</sup> than 2% of chromosomes had ~~less than one~~ <sup>no</sup> CO (n = 11). 234  
170 chromosomes had between one and two COs, suggesting that a single CO per chromosome  
171 is sufficient, though 419 chromosomes had more than two COs.

172 Using a Linear Mixed Model we found a significant **species random effect** (  
173  $\log_{10}(\text{recombination rate}) \sim \log_{10}(\text{chromosome size}) + (1 \mid \text{species})$ , marginal  $R^2 = 0.17$ ,  
174 conditional  $R^2 = 0.96$ ,  $p < 0.001$ ). Adding phylogenetic covariance did not improve the mixed  
175 model ~~thus~~ <sup>, so</sup> we did not retain a phylogenetic effect (Table S5). Interestingly, the (log-log)  
176 relationship between the recombination rate and ~~the~~ chromosome size was not the same  
177 within and between species, suggesting that absolute chromosome size does not have ~~a~~ <sup>the same</sup>  
178 ~~general~~ <sup>in all</sup> effect ~~among~~ species (Fig 1B). Similarly, the relationship between linkage map  
179 length (cM) and chromosome size (Mb) was highly species specific (linkage map length  $\sim$   
180  $\log_{10}(\text{chromosome size}) + (1 \mid \text{species})$ , marginal  $R^2 = 0.49$ , conditional  $R^2 = 0.99$ ,  $p <$   
181  $0.001$ ) (Fig 2A), with species slopes decreasing with the mean chromosome size ~~in a log-log~~  
182 ~~relationship~~. ~~It indicates~~ <sup>, indicating</sup> that species slopes are roughly proportional to the inverse of the  
183 mean chromosome size (Fig S4). ~~As a consequence,~~ <sup>tly</sup> the excess of COs on a chromosome  
184 (i.e. the linkage map length minus 50 cM) was ~~not~~ correlated with ~~the absolute chromosome~~ <sup>its relative</sup>  
185 ~~size but with the relative one (i.e. chromosome size divided by the mean chromosome size~~  
<sup>(i.e. chromosome size divided by the mean chromosome size of the species; Fig 2B)</sup> ~~, not the absolute size~~  
186 ~~of the species; Fig 2B)~~. Moreover, in contrast to the relationship between recombination rate  
187 and absolute size, we did not observe any difference between the linear model and the fixed  
188 regression of the mixed linear model, suggesting that this relationship is similar across

189 species (Fig 2B). ~~More concretely, it means that two chromosomes having~~ <sup>In other words, any</sup> ~~the same ratio of~~ <sup>with</sup>  
 190 size <sup>s</sup> will have the same ratio of excess of recombination rate, whatever the species and the  
 191 genome size.

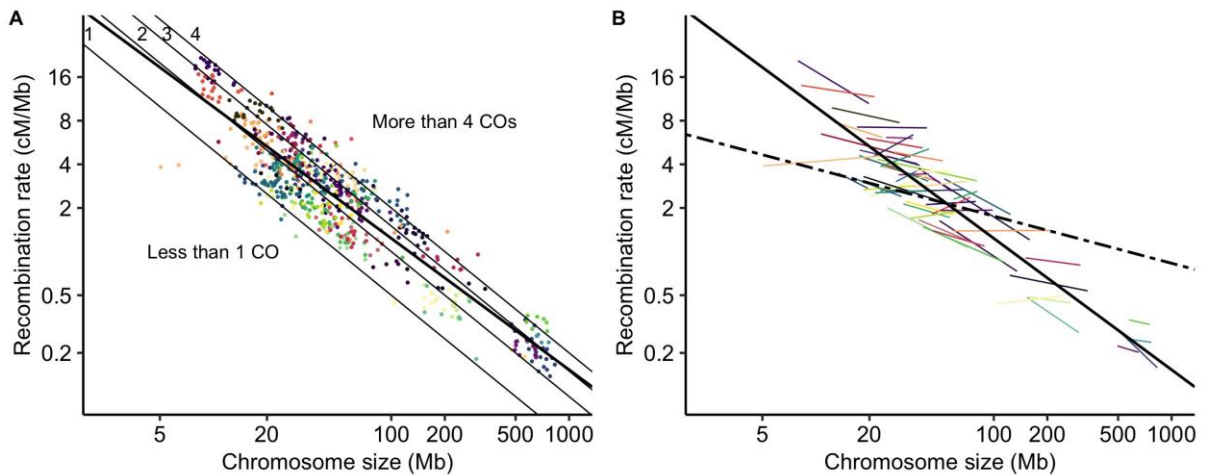

192

193 Fig 1. Mean recombination rates per chromosome (cM/Mb, ~~log scale~~) are negatively correlated  
 194 with chromosome <sup>physical</sup> ~~genomic~~ size (Mb, log scale). Each point represents a chromosome (n =  
 195 665). Species are presented in different colours (57 species). (A) The bold solid line represents  
 196 the linear regression line fitted to the data. The thin ~~solid~~ lines correspond to the expectation of  
 197 one, two, three or four COs per chromosome ~~respectively~~. (B) Correlations between  
 198 recombination rates and chromosome size within each species with at least 5 chromosomes  
 199 (coloured lines, 55 species) and the overall between-species correlation controlled for a species  
 200 effect (black dashed line, n = 57 species). Solid bold line as in (A).

201

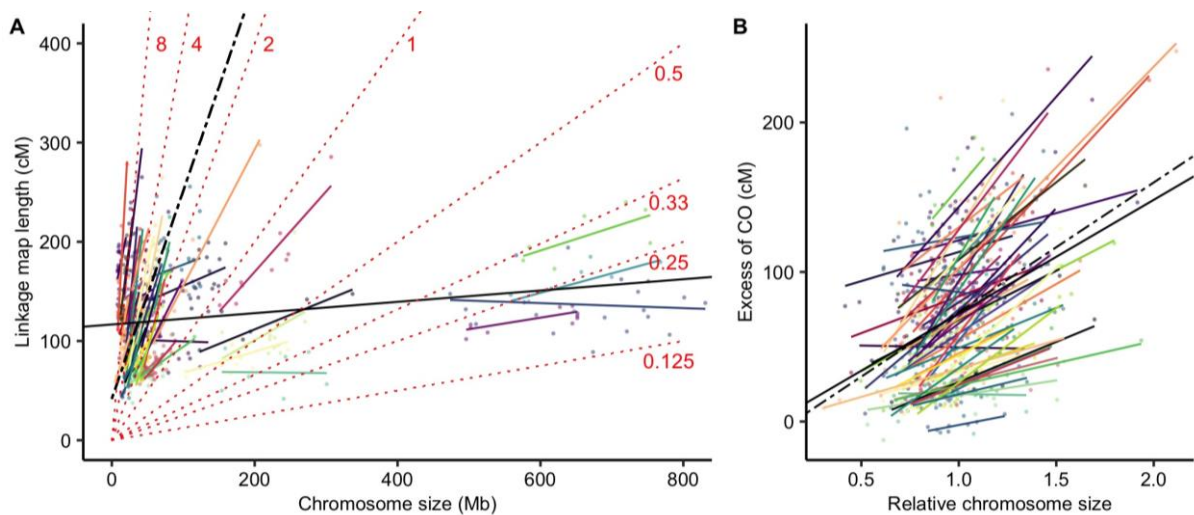

202

203 Fig 2. Linkage map length (cM) is positively correlated with genomic chromosome size (Mb). (A)  
 204 Correlation between chromosome genomic size (Mb) and linkage map length (cM). Each point  
 205 represents a chromosome (n = 665). Species are presented in different colours (57 species).

206 The black solid line represents the simple linear regression (linkage map length ~  
207  $\log_{10}(\text{chromosome size})$ , adjusted  $R^2 = 0.036$ ,  $p < 0.001$ ) and the black dashed line the fixed  
208 effect of the mixed model (linkage map length ~  $\log_{10}(\text{chromosome size}) + (1 | \text{species})$ ,  
209 marginal  $R^2 = 0.49$ , conditional  $R^2 = 0.99$ ,  $p < 0.001$ ). Species random slopes are shown in  
210 colours. Isolines of recombination rates are plotted for different values (indicated cM/Mb) as  
211 dotted red lines to represent regions with equal recombination. (B) The excess of COs (linkage  
212 map length minus 50 cM for the obligate CO) is positively correlated with the relative  
213 chromosome size (size / average size of the species). The black solid line is the linear  
214 regression across species (excess of CO ~ relative chromosome size, adjusted  $R^2 = 0.13$ ,  $p <$   
215  $0.001$ ) and the black dashed line the fixed effect of the mixed model (excess of CO ~ relative  
216 chromosome size +  $(1 | \text{species})$ , marginal  $R^2 = 0.14$ , conditional  $R^2 = 0.86$ ,  $p < 0.001$ ).  
217 Coloured solid lines represent individual regression lines for species with at least 5  
218 chromosomes (55 species).

## 219 Diversity of CO patterns among flowering plants

220 Recombination landscapes along chromosomes appeared to be qualitatively very similar  
221 within species but strongly varied between species (Fig 3, Fig S2). In the text below, we  
222 have used the terms proximal and distal regions, respectively, to avoid confusion with the  
223 molecular composition and specific position defining telomeric and centromeric regions  
224 *stricto sensu*. Some landscapes were homogeneous along chromosomes whereas others  
225 were extremely structured with recombination concentrated in the short distal parts of the  
226 genome, and wide variations between these two extremes (Fig 3). Representing relative  
227 recombination rates ~~on~~ <sup>in</sup> ten bins of equal ~~chromosome~~ <sup>physical</sup> length (see Materials and Methods for  
228 details), ~~we observed that the~~ bias towards the periphery was not ubiquitous across species  
229 (Fig 4), ~~unlike~~ <sup>whereas</sup> Haenel et al. (2018) ~~who~~ suggested that the distal bias could be universal for  
230 chromosomes larger than 30 Mb. Only a subset of species, especially those with very large  
231 chromosomes (> 100 Mb), exhibited a clear bias (Fig 4). Despite large chromosome sizes  
232 (mean chromosome sizes = 101 Mb and 198 Mb, respectively), *Nelumbo nucifera* and  
233 *Camellia sinensis* are noticeable exceptions to this pattern, with the highest recombination  
234 rates found in the middle of the chromosomes (*Nelumbo nucifera* illustrated in Fig 3E, other  
235 species in Fig S2). For small to medium-sized chromosomes, the pattern is less clear. Most  
236 species did not show any clear structure along the chromosome but a few of them (e.g.  
237 *Capsella rubella*, *Dioscorea alata*, *Mangifera indica*, *Manihot esculenta*) showed a drop in

238 recombination rates in the distal regions and high recombination rates in the proximal  
239 regions (*Capsella rubella* illustrated in Fig 3A).

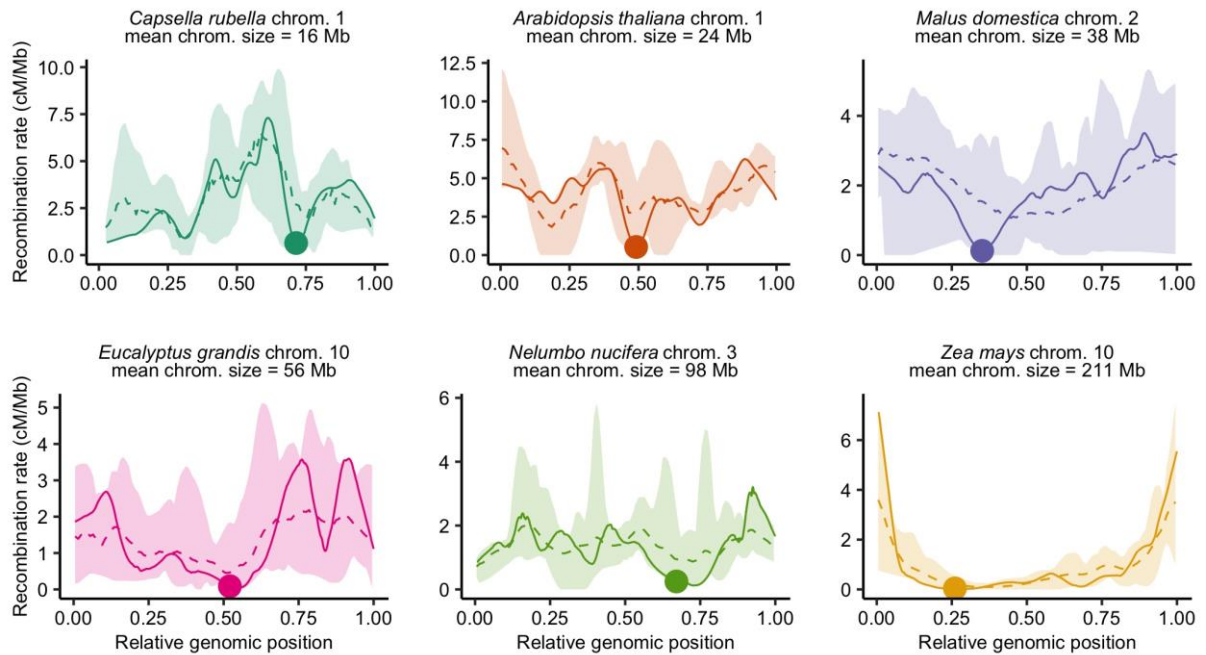

240

241 Fig 3. Diversity of recombination landscapes exemplified by six different species. Recombination  
242 landscapes are similar within species (the dashed line is the average landscape for pooled  
243 chromosomes, all recombination landscapes of the species are contained within the colour  
244 ribbon). Genomic distances (Mb) were scaled between 0 and 1 to compare chromosomes with  
245 different sizes. Estimates of the recombination rates were obtained by 1,000 bootstraps over  
246 loci in windows of 100 kb with loess regression and automatic span calibration. One  
247 chromosome per species is represented in a solid line, with the genomic position of the  
248 centromere demarcated by a dot. The six species are ordered by ascending mean  
249 chromosome size (Mb).

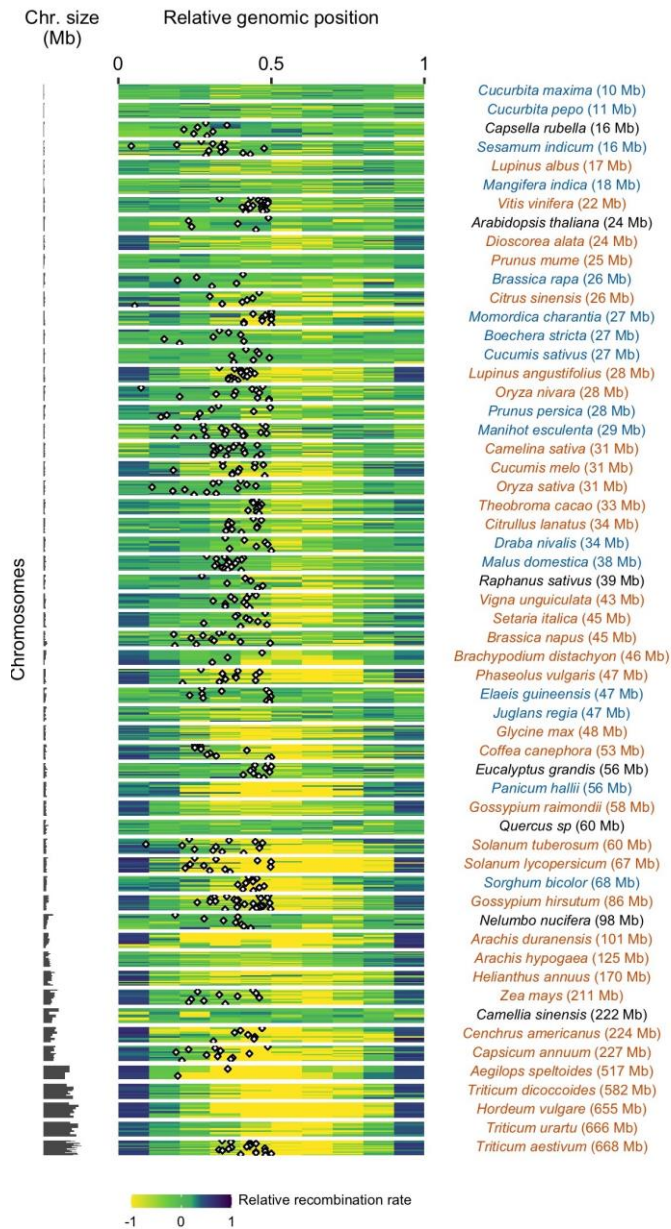

250

251 Fig 4. Patterns of recombination within chromosomes ( $n = 665$ ). Relative recombination rates  
 252 along the chromosome were estimated in ten bins of equal genomic size as the observed  
 253 genetic length divided by the expected genetic length (one tenth of total size) of the bin (log-  
 254 transformed). Values below (above) zero are recombination rates that are lower (higher) than  
 255 expected under a random distribution. The 5/7 species are ordered by ascending genome size (57  
 256 species). Each horizontal bar plot represents one chromosome. When available, the  
 257 centromere position is mapped as a black and white diamond.

258 Following Haenel et al. (2018), we calculated the periphery-bias ratio as the  
 259 recombination rate in the tips of the chromosome (10% at each extremity) divided by the  
 260 mean recombination rate. A ratio higher than 1 indicates a higher recombination rate in the  
 261 tips than the whole chromosome. By pooling chromosomes per species, we detected a



262 significant positive effect of chromosome length on the periphery-bias ratio across species  
 263 (Linear Model, adjusted  $R^2 = 0.44$ ,  $p < 0.001$ ; Fig 5A) with some exceptions (ex on Fig 3A  
 264 and 3E). Across all species the mean periphery-bias ratio is significantly higher than 1 (95%  
 265 bootstrapped confidence interval = [2.06;2.32]) and skewed towards values higher than 1 but  
 266 the correlation with chromosome length within species was not clear (Fig 5B, 5C, Table S6).

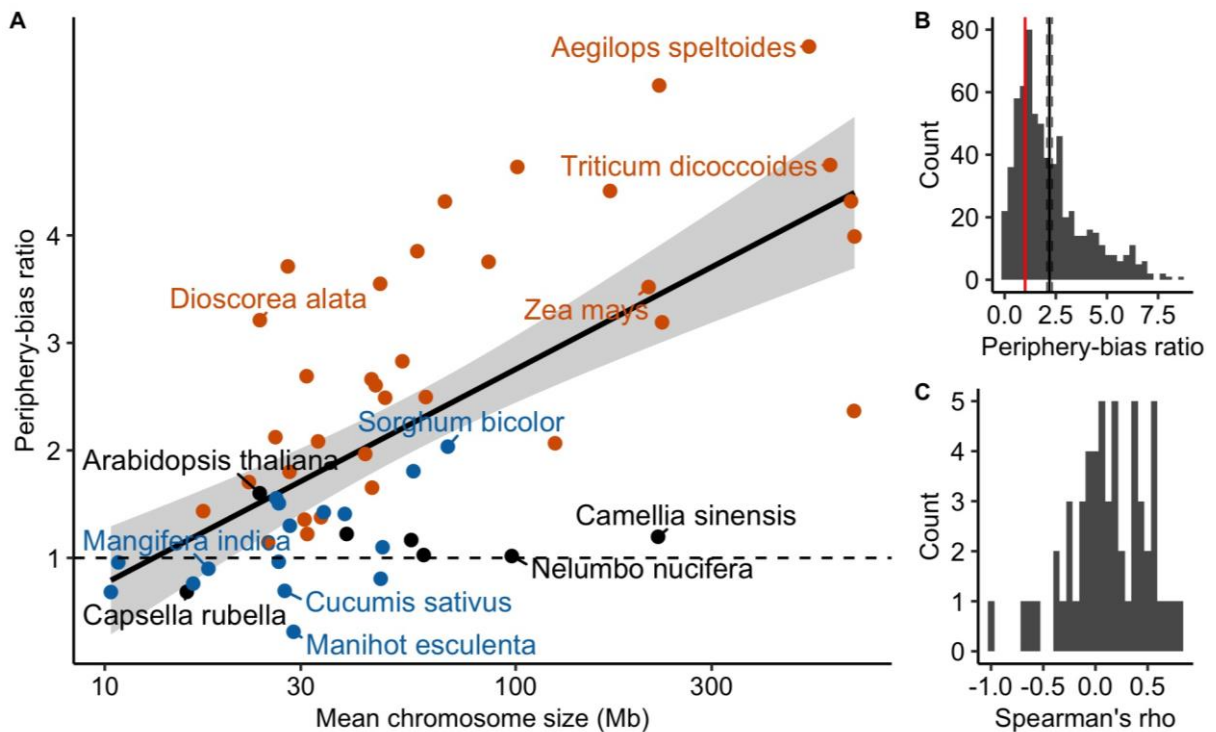

267

268 Fig 5. The periphery-bias ratio is positively correlated with chromosome genomic size. (A) Linear  
 269 regression between the species mean periphery-bias ratio and the mean chromosome size (log  
 270 scale) across species ( $n = 57$  species; adjusted  $R^2 = 0.44$ ,  $p < 0.001$ ). Points are coloured  
 271 according to the classification of the CO patterns described below (orange = distal, blue = sub-  
 272 distal, black = unclassified). (B) Distribution of periphery-bias ratios ( $n = 665$  chromosomes).  
 273 The mean periphery-bias ratio and its 95% confidence interval (black solid and dashed lines)  
 274 were estimated by 1,000 bootstrap replicates. The red vertical line corresponds to a ratio of  
 275 one. (C) Distribution of Spearman's correlation coefficients between the periphery-bias ratio  
 276 and chromosome genomic size (Mb) within species ( $n = 57$  species).

## 277 Joint effect of telomeres and centromeres on crossover distribution 278 along chromosomes

279 Globally, recombination rates were negatively correlated with the distance to the nearest  
 280 telomere (Fig S5, Table S7, Table S8). However, two <sup>qualitative</sup> different patterns <sup>qualitatively</sup> emerged  
 281 (Fig 6, Fig S6, Table S8). In 34 species, recombination decreased from the telomere and

282 reached a plateau ~~after a relative genomic distance of~~ <sup>at</sup> approximately 20% of the ~~whole~~  
length (or do you mean arm length)? <sup>pattern</sup>  
283 chromosome (the distal ~~model~~, Fig 6A), in agreement with the model suggested by Haenel  
284 et al. (2018). Sixteen species ~~presented~~ <sup>exhibited</sup> a sharp decrease in the most distal regions and a  
285 peak of recombination in the sub-distal regions (relative genomic distance between 0.1-0.2)  
286 followed by a slow decrease towards the centre of the chromosome (the sub-distal pattern,  
287 Fig 6B). There were a few exceptions to these two patterns (six species), e.g. *Capsella*  
288 *rubella* consistently showed higher recombination rates in the middle of the chromosome  
289 (Fig 3A). Interestingly, chromosomes from species classified as having a distal pattern were  
290 significantly larger than chromosomes with a sub-distal pattern (Wilcox rank sum test,  $p <$   
291 0.001, Fig 6C). Furthermore, the correlation between recombination and the distance to the  
292 nearest telomere was significantly higher for species with larger chromosomes (Spearman  
293 rank correlation coefficient  $Rho = -0.51$ ,  $p < 0.001$ ; Fig S5).

294 When the centromere position was known, **we observed that the centromeres had an**  
295 **almost universal local suppressor effect** (Fig 3, 4). In small and medium-sized  
296 chromosomes, the recombination was often suppressed <sup>only</sup> in short restricted centromeric  
297 regions (several Mb, 1-5 % of the map) displaying drastic drops in the recombination rates;  
298 ~~whereas the rest of the map did not seem to be affected.~~ In larger chromosomes, the  
299 suppression of recombination extends to large regions upstream and downstream of the  
300 physical centre of the chromosome (approximately 80-90% of the chromosome; Fig 4).  
301 Ninety percent of chromosomes (388 chromosomes) had significantly less recombination  
302 than the chromosome average at the centromeric index ( $n = 425$ , resampling test, 1,000  
303 bootstraps, 95 % confidence interval). 81 chromosomes (19 %) were **completely**  
304 **recombination-free in the centromere**. However, the transposition of centromere position  
305 from cytological data to genomic data may be imprecise or wrongly oriented for some  
306 chromosomes. After orienting chromosomes to map the centromeric index, 16 % of  
307 chromosomes (70 over 425) had a recombination rate slightly higher in the inferred

308 centromere position than on the opposite side, thus a centromere potentially mapped on the  
309 wrong side.

~~understand the patterns observed~~

310 To ~~go~~ further, we ~~formally~~ compared three models ~~that could explain the broad-scale~~  
311 ~~crossover patterns we observed~~ (Fig 7). Under the strict distal model proposed by Haenel et

312 al. (2018) (M1), the centromere ~~does not~~ <sup>s no</sup> play any role beyond its local suppressor effect,

313 ~~and therefore we expect~~ <sup>which predicts</sup> an ~~equal distribution of crossovers on both sides of the~~

314 ~~chromosome~~, independently of centromere position:  $\frac{d(1/2)}{d(1)} = 0.5$ , where  $d(1/2)$  is the

315 genetic distance (cM) <sup>physical?</sup> to the middle of the chromosome and  $d(1)$  is the total genetic distance

316 (cM). ~~In addition,~~ <sup>also</sup> we tested two alternative models <sup>with</sup> adding a centromere effect. We assumed

317 that the position of the centromere,  $d(c)$ , ~~has an effect on~~ <sup>affects</sup> the distribution of crossovers

318 along the chromosome. Models M2 'telomere + centromere + one CO per arm' and M3

319 'telomere + centromere + one CO per chromosome'; both assume that the relative genetic

320 distance of a chromosome arm is proportional to its relative genomic size. However, they

321 differ in the number and distribution of mandatory COs. At least one CO in each

322 chromosome arm (50 cM) is mandatory ~~in M2~~ <sup>In M2,</sup> whereas only one CO is mandatory for the

323 entire chromosome in M3. For species whose centromere position was known (37 species,

324 425 chromosomes) we regressed the observed values against the theoretical predictions of

325 the three models and compared them using goodness-of-fit criteria (adjusted  $R^2$ , AIC, BIC).

326 Model M2 was generally rejected since 22% of chromosomes ~~showed less than 50 cM in at~~ <sup>had genetic maps smaller</sup>

327 least one arm, ~~even~~ though it was supported in a handful of species (Table 1), ~~and model~~

328 ~~M1 was not supported by any species. Model M3 was the best supported model (30 out of~~

329 37 species), with good predictive power (Spearman rank correlation between predicted and

330 observed values:  $Rho = 0.72$ ,  $p < 0.001$ ; Tables 1, S9, S10). Given that ~~some chromosomes~~

331 ~~had one chromosome arm shorter than 50 cM, which is incompatible with one mandatory~~ <sup>genetic maps</sup> ~~CO per arm in model M2,~~ <sup>are</sup>

332 we also compared the three models on a subset of chromosomes

333 with at least 50 cM on each chromosome arm ( $n = 36$  species, 333 chromosomes) which

334 confirmed that model M3 was the best model. Similarly, we reran the model ~~without~~



using only whose s were known with certainty  
 335 chromosomes with uncertainty on the centromere position (n = 37 species, 355  
 336 chromosomes) and found the same results.

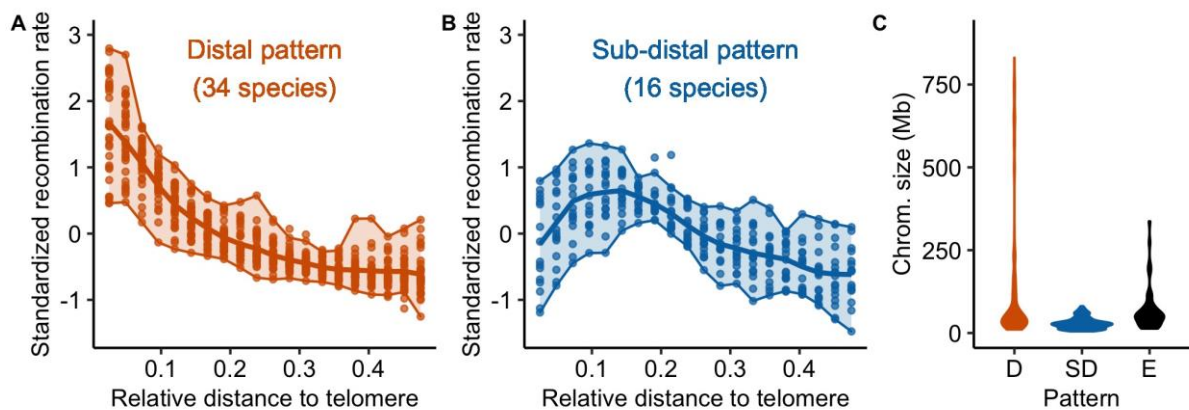

337  
 338 Fig 6. Distribution of crossover: main patterns. (A and B) Standardized recombination rates for  
 339 species (chromosomes pooled per species, n = 57 species) are expressed as a function of the  
 340 relative genomic distance from the telomere in 20 bins representing the two main patterns  
 341 (orange = distal, blue = sub-distal). The seven unclassified species are not shown.  
 342 Chromosomes were split in half and 0.5 corresponds to the centre of the chromosome. In each  
 343 plot, the solid line represents the mean recombination rate estimated in a bin (20 bins) and  
 344 each dot per bin represents the average of a species. Upper and lower boundaries of the ribbon  
 345 represent the maximum and minimum values. (C) Distribution of chromosome genomic sizes  
 346 (Mb) for each pattern.

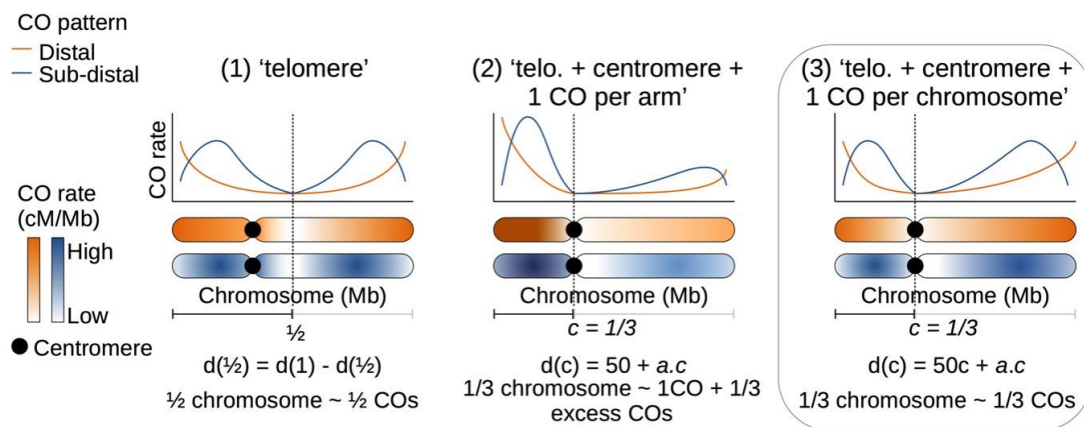

347  
 348 Fig 7. Possible models of crossover patterns. Schematic representation of the three competing  
 349 models for the two main patterns, with an example of a centromere position at 1/3 of the  
 350 chromosome. Model 3 is the best model (box).

351

352

353

354 Table 1. Model selection for the telomere/centromere effect (n = 37 species with a centromere  
 355 position, 425 chromosomes). Three competing models were compared based on the adjusted  
 356 R<sup>2</sup>, p-value and AIC-BIC criteria among chromosomes (the best supported model is in bold  
 357 characters). The number of species supporting each model was calculated based on the  
 358 adjusted R<sup>2</sup> within species, for all species with at least five chromosomes. (1) 'telomere' model.  
 359 (2) 'telomere + centromere + one CO per arm' model. (3) 'telomere + centromere + one CO per  
 360 chromosome' model.  $d(c)$  is the genetic distance to the centromere.  $d(1)$  is the total genetic  
 361 distance. A second model selection was done on a subset of chromosomes with at least 50 cM  
 362 on each chromosome arm (n = 36 species, 333 chromosomes).

| #                                          | Model                      | Expected                         | Adjusted R <sup>2</sup> | p       | AIC    | BIC    | Species |
|--------------------------------------------|----------------------------|----------------------------------|-------------------------|---------|--------|--------|---------|
| Full dataset (37 species, 425 chromosomes) |                            |                                  |                         |         |        |        |         |
| 1                                          | Telomere                   | $d(1/2) / d(1) = 0.5$            | 0.22                    | < 0.001 | -477.8 | -465.7 | 0       |
| 2                                          | Tel. + Cent. + CO per arm  | $(d(c) - 50) / (d(1) - 100) = c$ | -                       | 0.72    | 3098.2 | 3110.4 | 7       |
| 3                                          | Tel. + Cent. + CO per chr. | $d(c) / d(1) = c$                | 0.51                    | < 0.001 | -476.6 | -464.5 | 30      |
| Subset (36 species, 333 chromosomes)       |                            |                                  |                         |         |        |        |         |
| 1                                          | Telomere                   | $d(1/2) / d(1) = 0.5$            | 0.18                    | < 0.001 | -407.5 | -396.1 | 0       |
| 2                                          | Tel. + Cent. + CO per arm  | $(d(c) - 50) / (d(1) - 100) = c$ | -0.001                  | 0.42    | 1939.1 | 1950.5 | 10      |
| 3                                          | Tel. + Cent. + CO per chr. | $d(c) / d(1) = c$                | 0.50                    | < 0.001 | -396   | -384.6 | 26      |

### 363 Recombination rates are positively correlated with gene density

364 ~~At a fine scale,~~ it has been shown in a few species that COs preferentially occur in gene  
 365 ~~promoters.~~ (see the Introduction) The scale of 100 kb used here is too large to ~~directly~~ test whether this ~~is a~~  
 366 ~~common~~ is pattern shared among angiosperms. Instead, ~~like~~ as in Haenel et al. (2018), we  
 367 assessed whether recombination increased with gene density. Forty-one genomes were  
 368 annotated with gene positions. Across chromosomes, the distribution of chromosomal  
 369 correlations between gene count and recombination rate was clearly skewed towards  
 370 positive values, independently of the previously described CO patterns (mean Spearman's  
 371 rank correlation = 0.46 [0.43; 0.49]; Fig 8A). Ninety-one percent of 483 chromosomes (41  
 372 species) showed a significant correlation between the number of genes and recombination  
 373 rate at a 100 kb scale. ~~Yet~~ the strength of the relationship greatly varied across species and  
 374 did not correlate with usual predictors such as the chromosome length or the genome-wide  
 375 recombination rate (Fig 8B). Overall, standardized recombination rates (subtracting the  
 376 mean and dividing by the standard deviation to allow comparison among species)

377 consistently increased with the number of genes in most species (linear quadratic  
378 regression, adjusted  $R^2 = 0.62$ ,  $p < 0.001$ ; Fig 8C).

379 As for recombination patterns, we classified patterns of gene density along chromosomes  
380 in three categories: distal, sub-distal and exceptions (Fig S7). Most species (30 out of 41)  
381 were classified in the same gene density and recombination pattern (Table S11). Moreover,  
382 ~~when we classified species as a function of recombination patterns, we qualitatively~~  
383 ~~observed the same pattern for gene density and recombination (Fig 9), suggesting that~~  
384 ~~recombination and gene density share the same non-random distribution along the genome.~~  
*we observed the same qualitative pattern for gene density and recombination for species with either major recombination pattern*

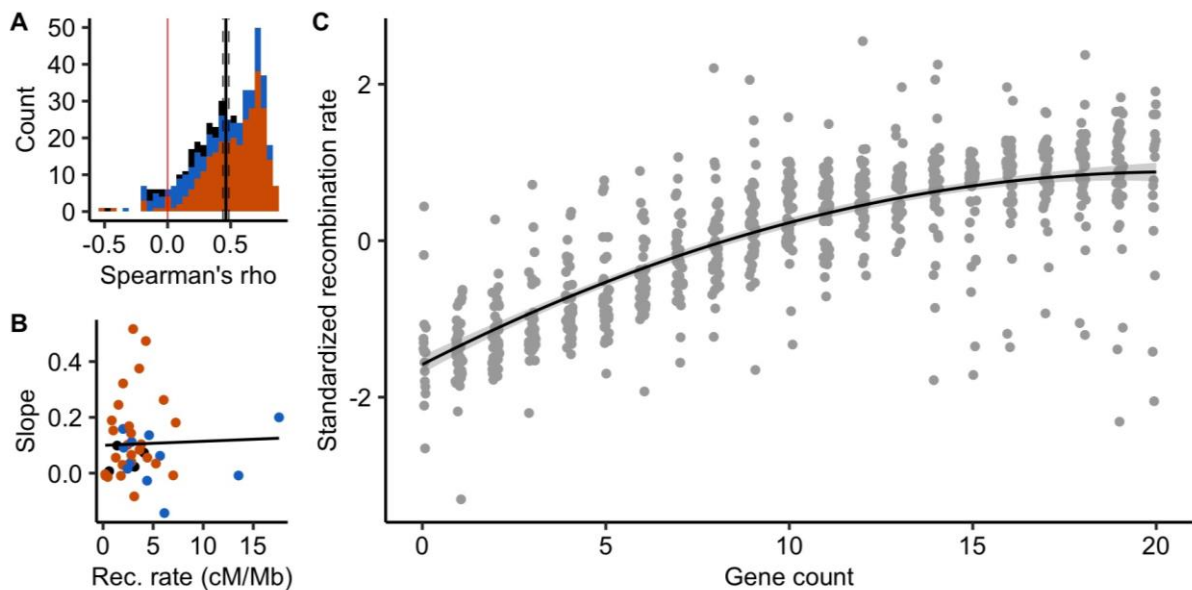

385

386 Fig 8. Recombination rates are positively correlated with gene density ( $n = 483$  chromosomes, 41  
387 species). (A) Distribution of chromosome Spearman's rank correlations between the number of genes and the recombination rate in 100 kb windows. The black vertical line is the mean correlation with a 95% confidence interval (dashed lines) estimated by 1,000 bootstrap replicates. Colours correspond to CO patterns (orange = distal, blue = sub-distal, black = exception). (B) Slopes of the species linear regression between gene count and recombination rates are independent of the species averaged recombination rate (Linear Model, adjusted  $R^2 = -0.02$ ,  $p = 0.83$ ). (C) Standardized recombination rates for each number of genes in a 100 kb window (centred-reduced, chromosomes pooled per species, one colour per species) estimated by 1,000 bootstraps and standardized within species. The gene count was estimated by counting the number of gene starting positions within each 100 kb window. The black line with a grey ribbon is the quadratic regression estimated by linear regression with a 95% parametric confidence interval (Linear Model, adjusted  $R^2 = 0.62$ ,  $p < 0.001$ ).

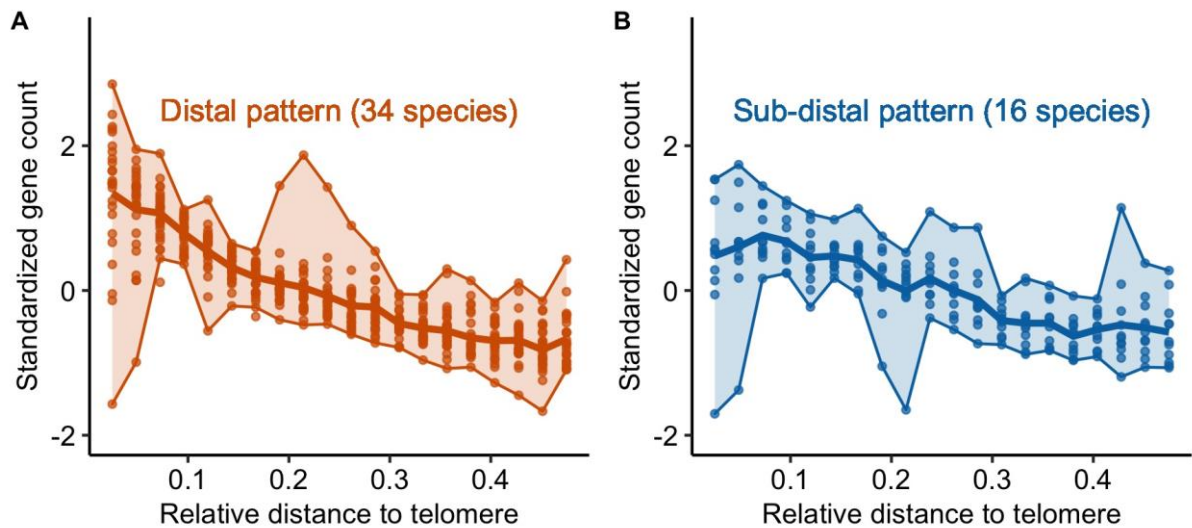

399

400 Fig 9. Gene counts patterns along the chromosome are correlated with CO patterns (n = 41  
 401 species). Standardized gene count (centred-reduced) as a function of the relative distance from  
 402 the tip to the middle of the chromosome (genomic distances distributed in 20 bins). We used  
 403 the same groups as identified for the CO pattern in Fig 6; (a) distal pattern vs (b) sub-distal  
 404 pattern. Same legend as Fig 6.

## 405 Genetic shuffling

406 We confirmed that ~~recombination is~~ <sup>crossovers are</sup> unevenly distributed in genomes, which ~~should~~ <sup>must</sup> affect  
 407 how genetic variation is ~~shuffled during meiosis~~. Genetic shuffling participates to the random  
<sup>recombined</sup> ~~reassortment of genes~~ <sup>recombination within and between chromosomes</sup> between parental homologous chromosomes. To quantify ~~how much~~  
 408 ~~genetic shuffling depends on the distribution of COs~~, we estimated its intrachromosomal  
 409 component,  $\bar{r}_{intra}$ , as described in equation 10 in Veller et al. (2019). The  $\bar{r}_{intra}$  gives, for a  
 410 chromosome, a measure of the probability for a random pair of loci to be ~~shuffled~~ <sup>recombined</sup> by a  
 411 crossover. As expected, ~~genetic shuffling~~ <sup>this</sup> was positively ~~and significantly~~ correlated with  
 412 linkage map length ( $\bar{r}_{intra} \sim \text{linkage map length} + (1 | \text{species})$ , marginal  $R^2 = 0.43$ ,  
 413 conditional  $R^2 = 0.88$ ,  $p < 0.001$ , Fig S8). COs clustered in distal regions ~~are supposed to~~ <sup>A pattern in which are physically chromosome is thought</sup>  
 414 generate less ~~genetic shuffling~~ <sup>recombination</sup> than COs evenly distributed ~~in~~ <sup>one with</sup> the chromosome. At a ~~chromosomal level~~, the periphery-bias ratio ~~as~~ <sup>across</sup> a low but significant effect on ~~genetic~~ <sup>References needed</sup>  
 415 ~~shuffling~~, consistent among species ( $\bar{r}_{intra} \sim \text{periphery-bias ratio} + (1 | \text{species})$ , marginal  $R^2$   
 416 = 0.05, conditional  $R^2 = 0.68$ ,  $p < 0.001$ , Fig S9). The more COs are clustered in the tips of

within-chromosome recombination [is this your meaning?]

419 the chromosome, the lower the ~~chromosomal genetic shuffling~~. These results verify the  
420 analytical predictions of Veller et al. (2019), although the strength of the effect remains weak.

421 However, the distributions of COs and genes are both non-random and often correlated  
422 (Fig 8 and S10). Genomic distances measured in base pairs may not be the most  
423 appropriate measure of ~~genetic shuffling~~ among functional genomic components. Thus, we <sup>also</sup>  
424 measured genomic distances in gene distances (i.e. the cumulative number of genes along  
425 the chromosome) instead of base pairs. Marey maps most often appeared more  
426 homogeneous when scaled on gene distances instead of base pair distances, with 70% (316  
427 over 450) of Marey maps showing a smaller departure from a random distribution (Fig 10,  
428 S11, Table S11). Globally, a subset of 30 species has more homogeneous Marey maps with  
429 gene distances whereas 11 others are quantitatively more heterogeneous (notably *Capsella*  
430 *rubella* and *Arabidopsis thaliana*), although this could be due to low quality annotations  
431 making it difficult to precisely estimate the gene distances for some of them (e.g. *Sesamum*  
432 *indicum*). In most cases, genetic shuffling ~~were~~ slightly higher when gene distances were  
433 used instead of base pairs (Fig 11; mean = 0.22 for base pairs; mean = 0.26 for gene  
434 distances; Wilcoxon rank sum test with continuity correction,  $p < 0.001$ ), implying ~~that the~~  
435 ~~genetic shuffling was more efficient~~ <sup>recombination</sup> among coding regions than among regions randomly  
436 sampled in the genome. Interestingly, the increase in ~~genetic shuffling~~ calculated in gene  
437 distances compared to genomic distance was more pronounced for longer chromosomes —  
438 which are often the most heterogeneous ones, characterized by a distal pattern — whereas  
439 we saw little effect on smaller chromosomes characterized by a sub-distal pattern (difference  
440 in  $\bar{r}_{intra} \sim \log_{10}(\text{chromosome size}) + (1 | \text{species})$ , marginal  $R^2 = 0.21$ , conditional  $R^2 = 0.87$ ,  
441  $p < 0.001$ , Fig 11).



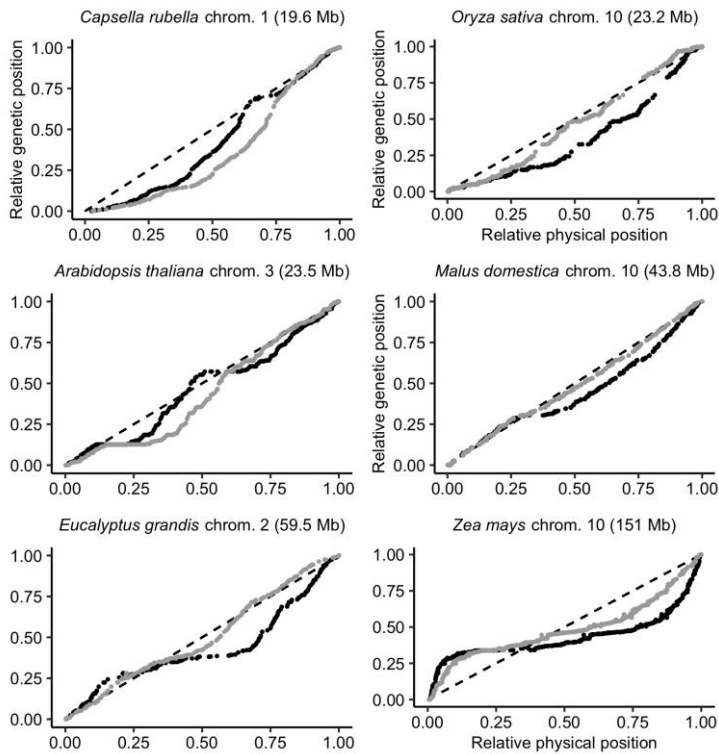

442

443 Fig 10. Marey maps of six chromosomes with the relative physical distance expressed in genomic  
 444 distances (black dots, position in the genome in Mb) or in gene distances (grey dots, position  
 445 measured as the cumulative number of genes along the chromosome). Marey maps are ordered  
 446 by ascending chromosome size (Mb). The diagonal dashed line represents a theoretical  
 447 random distribution of COs along the chromosome.

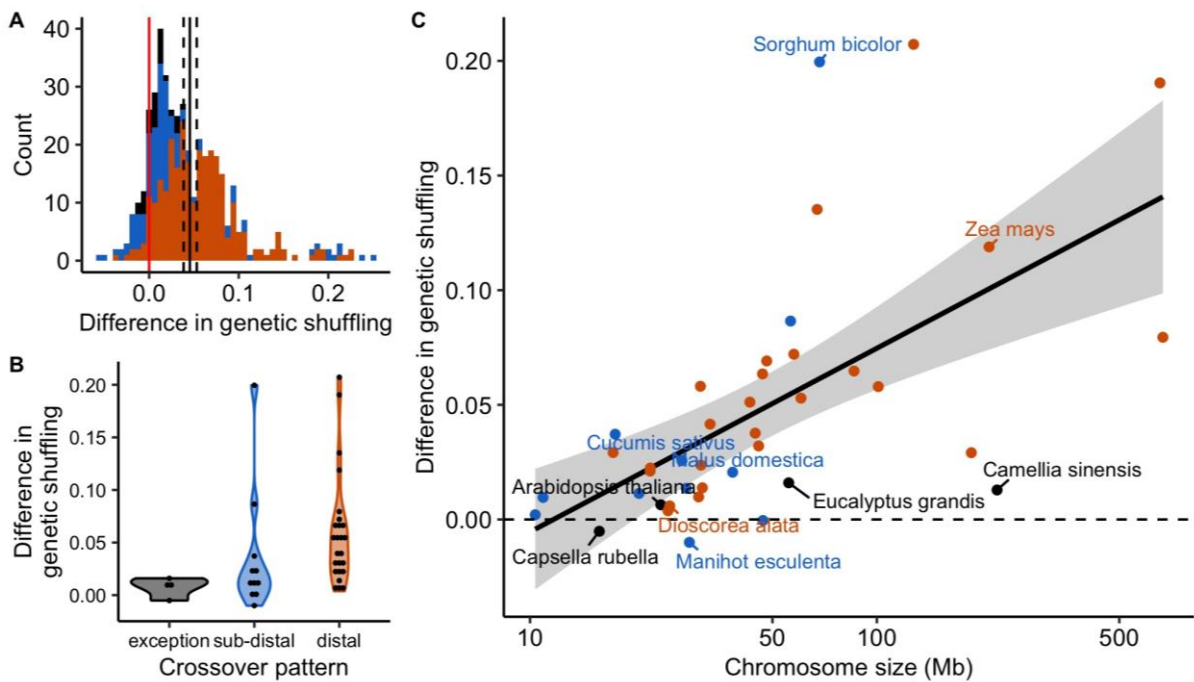

448

449 Fig 11. Differences in genetic shuffling between estimates based on genomic distances (Mb) and  
 450 gene distances (cumulative number of genes). The difference is the genetic shuffling in gene

451 distances minus the genetic shuffling in genomic distances. Colours correspond to CO patterns  
452 (orange = distal, blue = sub-distal, black = exception). (A) Distribution of the chromosome  
453 differences in the genetic shuffling (n = 444 chromosomes). (B) Distributions of the species  
454 difference in the genetic shuffling (n = 41 species, chromosomes pooled). (C) Species  
455 differences in the genetic shuffling are positively correlated with the averaged chromosome size  
456 (Linear Model, adjusted  $R^2 = 0.20$ ,  $p = 0.002$ ,  $n = 41$ , 95% parametric confidence interval).

## 457 Discussion

This has already been stated, and it is unnecessary to repeat it

458 ~~Based on a large and curated dataset, we provided, to our knowledge, the largest~~  
459 ~~description of recombination landscapes among flowering plants.~~ In addition to confirming  
460 that both the chromosome-wide recombination rate and the heterogeneity of recombination  
461 landscapes vary according to chromosome length, ~~we~~ **our new analyses** identified two distinct CO patterns and  
462 ~~we~~ proposed a new model that extended the strict telomere model recently proposed by  
463 Haenel et al. (2018). Moreover, the consistent correlation between recombination and gene  
464 density may have implications for the evolution of recombination landscapes and whether  
465 the distribution of COs is optimal for the efficacy of genetic shuffling.

### 466 Chromosome size and recombination rate

Some unnecessary repetition of results here can be removed — shorter will be clearer

467 We showed that, for most species, the smallest chromosome had roughly one or two  
468 COs, independently of chromosome size. This is in agreement with the idea that CO  
469 assurance is a ubiquitous regulation process among angiosperms (Pazhayam et al., 2021).  
470 Moreover, this constraint imposes a kind of basal recombination rate for each species, on  
471 the order of  $50/S_c$  cM/Mb, where  $S_c$  is the size of the lowest chromosome in Mb. Regardless  
472 of the genome size (which ranges three orders of magnitude or more), the number of COs  
473 remains relatively stable amongst species, most probably under the joint influence of CO  
474 assurance, interference and homeostasis (Otto and Payseur, 2019; Stapley et al., 2017;  
475 Wang et al., 2015). As a result, averaged recombination rates are negatively correlated with  
476 chromosome lengths, as already known in plants (Haenel et al., 2018; Tiley and Burleigh,  
477 2015).

Surely this is already known, for example from differences between closely related species with different rates, including selfer-outcrosser differences

478 However, there is no universal relationship between the absolute size of a chromosome  
479 and its mean recombination rate. Although the average recombination rate of a species is  
480 well predicted by its average chromosome size, the recombination rates of each  
481 chromosome separately are not well predicted by their absolute chromosome size. Instead,  
482 variation within species is much better explained by the relative chromosome size, and  
483 surprisingly, this relationship seems to be roughly the same among species (see Fig 1 and  
484 2). This suggests that CO interference is proportional to the relative size of the chromosome,  
485 as has been empirically observed in some plants (Ferreira et al., 2021). Although it is not  
486 clear yet which interference distance unit is the most relevant, genomic distances (in Mb) are  
487 excluded in most models of interference in favour of genetic distances (cM) (Foss et al.,  
488 1993) or, more likely, the length of the synaptonemal complex in micrometres (Capilla-Pérez  
489 et al., 2021; Kleckner et al., 2004; Lloyd and Jenczewski, 2019; Zickler and Kleckner, 2015).  
490 Both scales match our observation of a relative size effect. Within species, genetic maps  
491 increase with chromosome size, but among species they are uncorrelated and far less  
492 variable than genome sizes, which makes the relative chromosome size the main  
493 determinant of recombination rate variations among species. Similarly, physical sizes (in  
494 micrometres) at meiosis do not seem to scale with genome size, as chromosomal  
495 organization (nucleosomes, chromatin loops) strongly reduces the variation that could be  
496 expected given the genome size (Otto and Payseur, 2019).

## 497 Recombination patterns along chromosomes

498 We observed a global trend towards higher recombination rates in sub-distal regions  
499 (Gaut et al., 2007; Haenel et al., 2018). The distal bias increased with chromosome length,  
500 in agreement with the conclusions of Haenel et al. (2018), although our methods differ in  
501 resolution. We analysed species and chromosomes separately whereas Haenel et al. (2018)  
502 used averages over the different patterns, thereby masking chromosome- and species-  
503 specific particularities. For example, they did not detect the sub-distal pattern neither  
504 unclassified exceptions, whereas they seem common among species (16 and 7 species



505 respectively). So far, little is known about the mechanisms that could explain the link  
506 between the distal bias and chromosome length. Even if models of CO interference yield  
507 similar patterns (Falque et al., 2007; Zhang et al., 2014), the conceptual model of Haenel et  
508 al. (2018) is still the only one to explicitly consider chromosome length. The telomere effect  
509 is thought to act at a broad chromosome scale over long genomic distance. The decision of  
510 double strand breaks (DSBs) to engage in the CO pathway is made early on during meiosis  
511 and the early chromosome pairing beginning in telomeres is thought to favour distal COs  
512 (Bishop and Zickler, 2004; Higgins et al., 2012; Hinch et al., 2019). In barley, when the  
513 relative timing of the first stages of the meiotic program was shortened, COs were  
514 redistributed towards proximal regions (Higgins et al., 2012), as later observed in wheat  
515 (Osman et al., 2021).

Some unnecessary repetition of results here can be removed

516 Haenel et al. (2018) proposed that distance to the telomere is driving CO positioning, and  
517 therefore it should produce a symmetrical U-shaped pattern along chromosomes. However,  
518 a formal test showed that this model was too simple and that centromeres also played a role  
519 in the distribution of COs between chromosome arms. The best model (M3: 'telomere +  
520 centromere + one CO per chromosome') that we have proposed suggests that centromeres  
521 do not only have a local effect but also influence the symmetry of recombination landscapes  
522 over long distance, though a large proportion of our sample is metacentric, which might limit  
523 the detection of an effect. The local suppression of COs in centromeric regions is well known  
524 and largely conserved among species and seems a strong constitutive feature restricted to a  
525 short centromeric region, basically the kinetochore (Ellermeier et al., 2010; Fernandes et al.,  
526 2019). But the extent of the pericentromeric region varies drastically, most probably under  
527 the influence of DNA methylation, chromatin accessibility or RNA interference (Choi et al.,  
528 2018; Ellermeier et al., 2010; Hartmann et al., 2019; Pan et al., 2011). However, how  
529 centromeres (especially non-metacentric ones) may affect CO distribution at larger scales  
530 still needs to be determined.

## 531 Diversity of patterns among species

532 In addition to the role of centromeres, we also observed that recombination rates do not  
533 always decrease monotonically with the distance to the tip of the chromosome, showing that  
534 the distal model is not generally found among plants. We observed at least two different  
535 crossover patterns among plant species. Only 34 out of 57 species support a process  
536 starting at the tips (distal model), and 16 present the highest recombination rates in sub-  
537 distal regions, while seven species remain unclassified, which is at the limit of our visual  
538 classification. Globally, the distal pattern and distal bias seem to occur more often in larger  
539 chromosomes, but our data lack species with giant genomes. Giant genomes are not rare in  
540 plants, and we cannot extrapolate our conclusions to the upper range of the genome size  
541 variation (Pellicer et al., 2018). Astonishingly, a low-density genetic map in *Allium* showed  
542 higher recombination rates in the proximal regions, which is opposite to the major trend we  
543 found (Khrustaleva et al., 2005). Genera with giant genomes such as *Lilium* or *Allium* would  
544 have been valuable assets in our dataset, but the actual genomic and linkage data are  
545 relatively incomplete (Jo et al., 2017; Shahin et al., 2011).

546 The occurrence of various recombination patterns is in agreement with what is known of  
547 the timing of meiosis and heterochiasmy (the fact that male and female meiosis have  
548 different CO patterns). Despite the strong conservation of the main meiotic mechanism in  
549 plants, differences in the balance between key components may produce distinct CO  
550 patterns (de Massy, 2013; Higgins et al., 2012; Kuo et al., 2021; Zekowski et al., 2019). For  
551 example, the ZYP1 and ASY1 proteins have antagonistic effects on the formation of the  
552 synaptonemal complex in plants (Lambing et al., 2020). In barley and wheat, linearization of  
553 the chromosome axis triggered by ZYP1 is gradual along the chromosome and initiated in  
554 distal regions, forming the telomere bouquet where early DSBs form (Higgins et al., 2012;  
555 Osman et al., 2021). In contrast, chromosome axes are formed at a similar time in  
556 *Arabidopsis thaliana* and chromosomes are gradually enriched in ASY1 from the telomeres  
557 to the centromeres; a gene-dosage component favours synapsis and ultimately COs towards

558 the proximal regions (Laming et al., 2020). It appears that the timing of the meiotic  
559 programme is important for the distal bias, as it involves changes in the relative contribution  
560 of each meiotic component that could explain the re-localization of COs (Higgins et al., 2012;  
561 Laming et al., 2020). Therefore, the different patterns we observed may be explained by  
562 the different balance and timing of the expression of shared key regulators of CO patterning  
563 such as ZYP1 and ASY1 (Kuo et al., 2021). It is interesting to note that this is also true for  
564 mechanistic models of interference. Zhang et al. (2014) assessed that the ‘beam-film’ model  
565 is able to fit both CO patterns, regardless whether the tips of the chromosomes have an  
566 effect on interference or not, i.e. clamping. If clamping is assumed, the model predicts that  
567 mechanical stress culminates in the extremities of the chromosome leading to high CO rates  
568 at the periphery where it is released first. In contrast, when clamping is limited, mechanical  
569 stress is released in the tips of the chromosome and COs occur further from the tips, until a  
570 threshold of mechanical stress is reached. The observed sub-distal pattern fits these  
571 predictions.

572 The two patterns of recombination we described here can also be observed in opposite  
573 sexes within the same plant species (Capilla-Pérez et al., 2021; Dukić and Bomblies, 2022;  
574 Sardell and Kirkpatrick, 2019). Marked heterochiasmy variations between species, a feature  
575 shared among plants and animals, could influence the resulting sex-averaged recombination  
576 landscape (Sardell and Kirkpatrick, 2019). The sex-averaged telomere effect can be thought  
577 of as the product of two independent sex-specific landscapes although it is not clear how  
578 sex-specific maps ultimately contribute to the sex-averaged one (Johnston et al., 2016;  
579 Lenormand et al., 2016). Recombination is usually biased towards the tips of the  
580 chromosome in male recombination maps, but is more evenly distributed in female maps in  
581 the few plant species with available data (Sardell and Kirkpatrick, 2019). In *Arabidopsis*  
582 *thaliana*, male meiosis has higher CO rates within the tips of the chromosome, as it has  
583 been observed in other species with large chromosomes, whereas female meiosis is more  
584 homogeneously distributed, with the lowest rates found in the distal regions (Capilla-Pérez et

585 al., 2021). Shorter chromosome axes in *A. thaliana* female meiosis could induce fewer DSBs  
586 and class II non-interfering COs (Lloyd and Jenczewski, 2019). Conversely, in maize, the  
587 distal bias is similar in both sexes, despite higher CO rates for females (Kianian et al., 2018).  
588 Heterochiasmy is not universal in plants (Melamed-Bessudo et al., 2016), and we suggest  
589 that the variation in recombination landscapes could also result from variation in  
590 heterochiasmy among species, as it has been suggested for broad-scale differences in  
591 recombination landscapes between *A. thaliana* and its relative *A. arenosa* (Dukić and  
592 Bomblies, 2022). This hypothesis should be tested further as more sex-specific genetic  
593 maps become available.

#### 594 Recombination landscapes, gene density and genetic shuffling

595 We observed a strong convergence between CO patterns and gene density patterns. This  
596 correlation is consistent in our dataset despite possible errors in genome annotation and we  
597 also observed two different gene density patterns globally corresponding to similar CO  
598 patterns, emphasizing the close link between recombination and gene density. Interestingly,  
599 we found the same correlation in species with atypical chromosomes. For example, *Camellia*  
600 *sinensis* and *Nelumbo nucifera* have large genomes with homogenous recombination  
601 landscapes, and a recent annotation of the *Nelumbo nucifera* genome showed that genes  
602 are also evenly distributed along chromosomes at a broad scale (Shi et al., 2020), similar to  
603 *Camellia sinensis* (Wei et al., 2018). In wheat and rye, the analysis of the effect of  
604 chromosome rearrangement on recombination also suggests that CO localization is more  
605 locus-specific than location-specific: after inversions of distal and interstitial segments, COs  
606 were relocated to the new position on the distal segment (Lukaszewski, 2008; Lukaszewski  
607 et al., 2012). Overall, the parallel between gene density and recombination landscapes,  
608 confirmed by these two exceptions, is in agreement with the preferential occurrence of COs  
609 in gene regulatory sequences (Choi et al., 2018; He et al., 2017; Marand et al., 2019), and  
610 suggests that this may be a general pattern shared among angiosperms. Thus, gene  
611 distribution along chromosomes could be a main driver of recombination landscapes simply

612 by determining where COs may preferentially occur. It should be noted that since the gene  
613 number is usually positively correlated with chromosome size within a species but is roughly  
614 independent of genome size among species, this hypothesis also matches with the relative-  
615 size effect discussed above.

616 However, gene density and recombination rates are both correlated with many other  
617 genomic features, such as transposable elements (Charlesworth et al., 1994; Kent et al.,  
618 2017). The accumulation of transposable elements in low recombining regions would  
619 progressively decrease gene density in the region, and would eventually result in a positive  
620 correlation between gene density and recombination. However, the correlation of  
621 recombination rates with transposable elements is not always clear and different TE families  
622 have opposite correlations (Kent et al., 2017; Underwood and Choi, 2019). Causality  
623 mechanisms of these multiple interactions still need to be clarified. The use of fine scale  
624 recombination maps (using very large mapping populations or LD maps) should help  
625 identifying the respective role of genic regions (especially the role of promoters) and  
626 transposable elements (or other genomic features).

627 Irrespective of the underlying mechanism, our finding implies that the CO distribution  
628 ultimately scales with the gene distribution. Therefore, in most species, COs have a more  
629 even distribution between genes than between random genomic locations (Fig 10). The  
630 redistribution of COs towards functional regions could be a simple consequence of COs  
631 occurring within gene regulatory sequences, but it has important evolutionary implications  
632 such as increasing the genetic shuffling and homogenizing the probability of two random  
633 genes to recombine, especially for large genomes that exhibit the strongest difference in  
634 genetic shuffling between genes and between genomic locations (Fig 11). Therefore, CO  
635 patterning (and not only the global CO rate) could be under selection not only for its direct  
636 effect on the functioning of meiosis but also for its indirect effects on selection efficacy (Otto  
637 and Payseur, 2019). Recombination decreases linkage disequilibrium and negative  
638 interferences between adjacent loci (e.g. Hill-Robertson Interference), and thus locally

639 increases the efficacy of selection. Functional sites are targets for selection (Nachman and  
640 Payseur, 2012) and we found higher recombination rates in functional regions, meaning that  
641 only a few genes are ultimately excluded from the benefits of recombination, even under the  
642 most pronounced distal bias.

643 Higher recombination rates in gene-rich regions could provide a satisfying explanation as  
644 to why the distal bias is maintained among species despite its theoretical lack of efficacy for  
645 genetic shuffling (Veller et al., 2019). The association between CO hotspots and gene  
646 regulatory sequences is mechanistically driven by chromatin accessibility, but it does not  
647 exclude the evolution of the mechanism itself towards the benefits of recombining more in  
648 gene-rich regions (Lenormand et al., 2016). However, slight variations in genetic shuffling  
649 caused by the non-random distribution of COs are less likely to be under strong selection  
650 compared to stabilizing selection on molecular constraints for chromosome pairing and  
651 segregation (Ritz et al., 2017), although interference is sometimes likely to evolve towards  
652 relaxed physical constraints (Otto and Payseur, 2019). In addition, the intra-chromosomal  
653 component of the genetic shuffling is a small contributor to the genome-wide shuffling rate,  
654 as a major part is due to independent assortment among chromosomes (Veller et al., 2019).  
655 Our estimates for the chromosomal genetic shuffling do not reach the theoretical optimal  
656 value of 0.5. The pattern is not absolute, and a fraction of genes remains in low recombining  
657 regions. In grass species, up to 30% of genes are found in recombination deserts and are  
658 not subject to efficient selection (e.g. Mayer et al., 2011). Finally, it is still an open question  
659 as to whether this global distribution of COs in gene regulatory sequences is advantageous  
660 for the genetic diversity and adaptive potential of a species (Pan et al., 2016).

## 661 Conclusion

662 Our comparative study only demonstrates correlations, and not mechanisms, but helps to  
663 understand the diversity and determinants of recombination landscapes in flowering plants.  
664 Our results partly confirm previous studies based on fewer species (Haenel et al., 2018;  
665 Stapley et al., 2017; Tiley and Burleigh, 2015) while bringing new insights that alter previous

666 conclusions thanks to a detailed analysis at the species and chromosome levels. Two main  
667 and distinct CO patterns emerge across a large set of flowering plant species; it seems likely  
668 that chromosome structure (length, centromere) and gene densities are the major drivers of  
669 these patterns, and the interactions between them raise questions about the evolution of  
670 complex genomic patterns at the chromosome scale (Gaut et al., 2007; Nam and Ellegren,  
671 2012). The new large and curated dataset we provide in the present work should be useful  
672 for addressing such questions and testing future evolutionary hypotheses regarding the role  
673 of recombination in genome architecture.

## 674 Materials and Methods

### 675 Data preparation

676 To build recombination maps, we combined genetic and genomic maps in angiosperms  
677 that had already been published in the literature. We conducted a literature search to collect  
678 sex-averaged genetic maps estimated on pedigree data – with markers positions in  
679 centiMorgans (cM). The keywords used were ‘genetic map’, ‘linkage map’, ‘genome  
680 assembly’, ‘plants’ and ‘angiosperms’, combined with ‘high-density’ or ‘saturated’ in order to  
681 target genetic maps with a large number of markers and progenies. Additionally, we carried  
682 out searches within public genomic databases to find publicly available genetic maps. Only  
683 species with a reference genome assembly at a chromosome level were included in our  
684 study (a complete list of genetic maps with the associated metadata is given in Tables S1,  
685 S2). As much as possible, genomic positions along the chromosome (Mb) were estimated by  
686 blasting marker sequences on the most recent genome assembly (otherwise genomic  
687 positions were those of the original publication). Genome assemblies with annotation files at  
688 a chromosome-scale were downloaded from NCBI (<https://www.ncbi.nlm.nih.gov/>) or public  
689 databases. Marker sequences were blasted with ‘blastn’ and a 90% identity cutoff. Markers  
690 were anchored to the genomic position of the best hit. When the sequence was a pair of  
691 primers, the mapped genomic position was the best hit between pairs of positions showing a

692 short distance between the forward and reverse primer (< 200 bp). In a few exceptions (see  
693 Table S1), genomic positions were mapped on a close congeneric species genome and the  
694 genomic map was kept if there was good collinearity between the genetic and genomic  
695 positions. Chromosomes were numbered as per the reference genome assembly. When  
696 marker sequences were not available, we kept the genomic positions published with the  
697 genetic map. The total genomic length was estimated by the length of the chromosome  
698 sequence in the genome assembly. The total genetic length was corrected using Hall and  
699 Willis's method (Hall and Willis, 2005) which accounts for undetected events of  
700 recombination in distal regions by adding  $2s$  to the length of each linkage group (where  $s$  is  
701 the average marker spacing in the group).

702 We selected genetic and genomic maps after stringent filtering and corrections, using  
703 custom scripts available in a public Github repository  
704 ([https://github.com/ThomasBrazier/diversity-determinants-recombination-landscapes-  
705 flowering-plants.git](https://github.com/ThomasBrazier/diversity-determinants-recombination-landscapes-flowering-plants.git)). We assumed that markers must follow a monotone increasing function  
706 when plotting genetic distances as a function of genomic distances in a chromosome (i.e.  
707 the Marey map) and collinearity between the genetic map and the reference genome was  
708 required to keep a Marey map. If necessary, genetic maps were reoriented so that the Marey  
709 map function is increasing (i.e. genetic distances read in the opposite direction). In a first  
710 step, Marey maps with fewer than 50 markers per chromosome were removed, although a  
711 few exceptions were visually validated (maps with ~30 markers). Marey maps with more  
712 than 10% of the total genomic map length missing at one end of the chromosome were  
713 removed. Marey maps with obvious artefacts and assembly mismatches (e.g. lack of  
714 collinearity, large inversions, large gaps) were removed. Markers clearly outside the global  
715 trend of the Marey map (e.g. large genetic/genomic distance from the global cloud of  
716 markers or from the interpolated Marey function, no other marker in a close neighbourhood)  
717 were visually filtered out, and multiple iterations of filtering/interpolation helped to refine  
718 outlier removal. The Marey map approach is a graphical method, so figures were



719 systematically produced at each step as a way to evaluate the results of the filtering and  
720 corrections. Finally, when multiple datasets were available for the same species, we  
721 selected the dataset with the highest marker density – in addition to visual validation – to  
722 maintain a balanced sampling and avoid pseudo-replicates of the same chromosome.

### 723 Estimates of local recombination rates

724 Local recombination rates along the chromosome were estimated with custom scripts  
725 following the Marey map approach, as described in the MareyMap R package (Rezvoy et al.,  
726 2007). The mathematical function of the Marey map was interpolated with a two-degree  
727 polynomial loess regression. Each span smoothing parameter was calibrated by 1,000  
728 iterations of hold-out partitioning (random sampling of markers between two subsets; 2/3 for  
729 training and 1/3 for testing) with the Mean Squared Error of the loess regression as a  
730 goodness-of-fit criterion. The possible span ranged from 0.2 to 0.5 and was visually adjusted  
731 for certain maps. The local recombination rate was the derivative of the interpolated  
732 smoothed function in fixed 100 kb and 1 Mb non-overlapping windows. Negative estimates  
733 were not possible as we assumed a monotonously increasing function and negative  
734 recombination rates were set to zero. The 95% confidence intervals of the recombination  
735 rates were estimated by 1,000 bootstrap replicates of the markers and recombination  
736 landscapes with large confidence interval were discarded. The quality of the estimates was  
737 checked using the correlation between the 100 kb and 1 Mb windows.

### 738 The distribution of CO along chromosomes

739 The spatial structure of recombination landscapes across species and chromosomes is a  
740 major feature of recombination landscapes. We divided the Marey map in  $k$  segments of  
741 equal genomic size (Mb) and then calculated the relative genetic size (cM) of each segment.  
742 Under the null model (i.e. random recombination), one expects  $k$  segments of equal genetic  
743 size  $1/k$ . The relative recombination rate in the segment  $i$  was estimated by the log-ratio of

744 the observed genetic size (i.e. genetic size of segment  $i$ ) divided by the expected genetic  
745 size (i.e. fixed to total genetic size /  $k$  by the model), as in the following equation.

746 
$$\text{relative recombination rate} = \log_{10} \frac{\text{genetic}_i}{\text{genetic}_{total}/k}$$

747 Given the observation that most recombination landscapes are broken down into at least  
748 three segments (White and Hill, 2020), we arbitrarily chose a number of segments  $k = 10$  to  
749 reach a good resolution (a larger  $k$  did not show any qualitative differences).

## 750 Crossover patterns and the periphery-bias ratio

751 We investigated the spatial bias towards distal regions of the chromosome in the  
752 distribution of recombination by estimating recombination rates as a function of relative  
753 distances to the telomere (i.e. distance to the nearest chromosome end). Chromosomes  
754 were split by their midpoint and only one side was randomly sampled for each chromosome  
755 to avoid pseudo-replicates and the averaging of two potentially contrasting patterns on  
756 opposite arms. The relative distance to the telomere was the distance to the telomere  
757 divided by total chromosome size, then divided into 20 bins of equal relative distances. A  
758 periphery-bias ratio metric similar to the one presented in Haenel et al. (2018) was estimated  
759 to measure the strength of the distal bias. We divided the recombination rates in the tip of  
760 the chromosome (10% on each side of the chromosome, and one randomly sampled tip) by  
761 the mean recombination rate of the whole chromosome. We investigated the sensitivity of  
762 this periphery-bias ratio to the sampling scale by calculating the ratio for many distal region  
763 sizes (Fig S12).

## 764 Testing centromere or telomere effects

765 We searched the literature for centromeric indices (ratio of the short arm length divided by  
766 the total chromosome length) established by cytological measures. When we had no  
767 information about the correct orientation of the chromosome (short arm/long arm), the  
768 centromeric index was oriented to match the region with the lowest recombination rate of the

769 whole chromosome (i.e. putative centromere). To determine if telomeres and centromeres  
770 play a significant role in CO patterning, we fitted empirical CO distributions to three  
771 theoretical models of CO distribution. In the following equations,  $d(x)$  is the relative genetic  
772 distance at the relative genomic position  $x$ , and  $a$  is a coefficient corresponding to the excess  
773 of COs per genomic distance. Under the strict 'telomere' model (1), we assumed that only  
774 telomeres played a role in CO distribution, i.e. an equal distribution of COs on both sides of  
775 the chromosome (i.e.  $d(1/2) = d(1) - d(1/2)$ ), such that  $\frac{d(1/2)}{d(1)} = 0.5$ . The 'telomere +  
776 centromere + one mandatory CO per arm' model (2) assumed at least one CO per  
777 chromosome arm and a relative genetic distance of each chromosome arm proportional to  
778 its relative genomic size, corresponding to the role of centromere position, denoted  $d(c)$ . We  
779 have  $d(c) = 50 + a \times c$  and  $d(1) - d(c) = 50 + a \times (1 - c)$ , such that  $\frac{d(c)-50}{d(1)-100} = c$ . Lastly,  
780 the 'telomere + centromere + one CO per chromosome' model (3) assumed at least one CO  
781 per chromosome and a relative genetic distance within the chromosome proportional to its  
782 relative genomic distance. We have  $d(c) = c \times 50 + a \times c$  and  $d(1) - d(c) = (1 - c) \times 50 +$   
783  $a \times (1 - c)$ , such that  $\frac{d(c)}{d(1)} = c$ . The three competing models were compared with a linear  
784 regression between empirical and theoretical values, based on the adjusted  $R^2$  and AIC-BIC  
785 criteria among chromosomes. The number of species supporting each model was calculated  
786 based on the adjusted  $R^2$  within species, for all species with at least five chromosomes.

## 787 Gene density

788 We retrieved genome annotations ('gff' files) for genes, coding sequences and exon  
789 positions, preferentially from NCBI and otherwise from public databases (41 species). We  
790 estimated gene counts in 100 kb windows for recombination maps by counting the number  
791 of genes with a starting position falling inside the window. For each gene count, we  
792 estimated the species mean recombination rate and its confidence interval at 95% by 1,000  
793 bootstrap replicates (chromosomes pooled per species). Most species had rarely more than  
794 20 genes over a 100 kb span and variance dramatically increased in the upper range of the

795 gene counts, and therefore we pruned gene counts over 20 for graphical representation and  
796 statistical analyses.

## 797 Genetic shuffling

798 To assess the efficiency of the recombination between chromosomes and species, we  
799 calculated the measure of intra-chromosomal genetic shuffling described by Veller et al.  
800 (2019). To have even sampling along the chromosome, genetic positions (cM) of 1,000  
801 pseudo-markers evenly distributed along genomic distances (Mb) were interpolated using a  
802 loess regression on each Marey map, following the same smoothing and interpolation  
803 procedure as for the estimation of the recombination rates. The chromosomal genetic  
804 shuffling  $\bar{r}_{intra}$  were calculated as per the intra-chromosomal component of the equation 10  
805 presented in Veller et al. (2019). For a single chromosome,

$$806 \quad \bar{r}_{intra} = \sum_{i < j} (r_{ij} / \binom{\Lambda}{2})$$

807 where  $\Lambda$  is the total number of loci,  $\binom{\Lambda}{2} = \Lambda(\Lambda - 1)/2$  and  $r_{ij}$  is the rate of shuffling for  
808 the locus pair  $(i, j)$ . For the intra-chromosomal component  $\bar{r}_{intra}$ , the pairwise shuffling rate  
809 was only calculated for linked sites, i.e. loci on the same chromosome. This pairwise  
810 shuffling rate was estimated by the recombination fraction between loci  $i$  and  $j$ .  
811 Recombination fractions were directly calculated from Haldane or Kosambi genetic distances  
812 between loci by applying a reverse Haldane function (1) or reverse Kosambi function (2),  
813 depending on the mapping function originally used for the given genetic map.

$$814 \quad r_{ij} = \frac{1}{2}(1 - e^{-2d_{ij}/100}) \quad (1)$$

$$815 \quad r_{ij} = \tanh \frac{1}{2} \tanh(2d_{ij}/100) \quad (2)$$

816 We also estimated marker positions in gene distances instead of genomic distances (Mb)  
817 to investigate the influence of the non-random distribution of genes on the recombination

818 landscape. Gene distances were the cumulative number of genes along the chromosome at  
819 a given marker's position. Splicing variants and overlapping genes were counted as a single  
820 gene. The genetic shuffling was re-estimated with gene distances instead of genomic  
821 distances to consider a genetic shuffling based on the gene distribution, as suggested by  
822 Veller et al. (2019). To compare the departure from a random distribution along the  
823 chromosome among both types of distances (i.e. genomic and genes), we calculated the  
824 Root Mean Square Error (RMSE) of each Marey map and for both distances. To assess if  
825 the distribution of genes influenced the heterogeneity of recombination landscapes, the type  
826 of distance with the lower RMSE was considered as the more homogeneous landscape.  
827 However, this measure for gene distances is sensitive to annotation errors and artefacts.  
828 False negatives are therefore expected (when Marey maps were assessed as more  
829 homogeneous in genomic distances while the inverse is true) and this classification remains  
830 conservative.

## 831 Statistical analyses

832 All statistical analyses were performed with R version 4.0.4 (R Core Team, 2019). We  
833 assessed statistical relationships with the non-parametric Spearman's rank correlation and  
834 regression models. Linear Models were used for regressions with species data since we did  
835 not detect a phylogenetic effect. The structure in the chromosome dataset was accounted for  
836 by Linear Mixed Models (LMER) implemented in the 'lme4' R package (Bates et al., 2015, p.  
837 4) and the phylogenetic structure was tested by fitting the Phylogenetic Generalized Linear  
838 Mixed Model (PGLMM) of the 'phyr' R package (Ives et al., 2019). The phylogenetic time-  
839 calibrated supertree used for the covariance matrix was retrieved from the publicly available  
840 phylogeny constructed by Smith and Brown (Smith and Brown, 2018). Marginal and  
841 conditional  $R^2$  values for LMER were estimated with the 'MuMIn' R package (Bartoń, 2020).  
842 Significance of the model parameters was tested with the 'lmerTest' R package (Kuznetsova  
843 et al., 2017). We selected the model based on AIC/BIC criteria and diagnostic plots.  
844 Reliability and stability of the various models were assessed by checking quantile-quantile

845 plots for the normality of residuals and residuals plotted as a function of fitted values for  
846 homoscedasticity. Model quality was checked by the comparison of predicted and observed  
847 values. Given the skewed nature of some distributions, we used logarithm (base 10)  
848 transformations when appropriate. For comparison between species, statistics were  
849 standardized (i.e. by subtracting the mean and dividing by standard deviation). Mean  
850 statistics and 95% confidence intervals were estimated by 1,000 bootstrap replicates.

## 851 Acknowledgements

852 We thank Eric Janczewski, Laurent Duret, Anne-Marie Chèvre, Eric Petit and Armel  
853 Salmon, as well as three anonymous reviewers, for precious comments on the results and  
854 manuscript. We thank all the people that provided us genetic data that were not published  
855 yet.

## 856 Author contributions

857 SG conceptualised and supervised the study. TB produced and analysed data. Both authors  
858 contributed to writing the paper.

## 859 References

860 Apuli, R.-P., Bernhardsson, C., Schiffthaler, B., Robinson, K.M., Jansson, S., Street, N.R.,  
861 Ingvarsson, P.K., 2020. Inferring the Genomic Landscape of Recombination Rate Variation  
862 in European Aspen (*Populus tremula*). *G3 GenesGenomesGenetics* 10, 299–309.  
863 <https://doi.org/10.1534/g3.119.400504>

864 Bartoń, K., 2020. MuMIn: Multi-model inference (manual).

865 Barton, N.H., 1995. A general model for the evolution of recombination. *Genet. Res.* 65,  
866 123–144. <https://doi.org/10.1017/S0016672300033140>

867 Bates, D., Mächler, M., Bolker, B., Walker, S., 2015. Fitting linear mixed-effects models  
868 using lme4. *J. Stat. Softw.* 67, 1–48. <https://doi.org/10.18637/jss.v067.i01>

869 Bishop, D.K., Zickler, D., 2004. Early decision; meiotic crossover interference prior to  
870 stable strand exchange and synapsis. *Cell* 117, 9–15. [https://doi.org/10.1016/S0092-  
871 8674\(04\)00297-1](https://doi.org/10.1016/S0092-8674(04)00297-1)

872 Blitzblau, H.G., Bell, G.W., Rodriguez, J., Bell, S.P., Hochwagen, A., 2007. Mapping of  
873 Meiotic Single-Stranded DNA Reveals Double-Strand-Break Hotspots near Centromeres  
874 and Telomeres. *Curr. Biol.* 17, 2003–2012. <https://doi.org/10.1016/j.cub.2007.10.066>

875 Booker, T.R., Yeaman, S., Whitlock, M.C., 2020. Variation in recombination rate affects  
876 detection of outliers in genome scans under neutrality. *Mol. Ecol.* mec.15501.  
877 <https://doi.org/10.1111/mec.15501>

878 Capilla-Pérez, L., Durand, S., Hurel, A., Lian, Q., Chambon, A., Taochy, C., Solier, V.,  
879 Grelon, M., Mercier, R., 2021. The synaptonemal complex imposes crossover interference  
880 and heterochiasmy in *Arabidopsis*. *Proc. Natl. Acad. Sci.* 118, e2023613118.  
881 <https://doi.org/10.1073/pnas.2023613118>

882 Charlesworth, B., Sniegowski, P. & Stephan, W., 1994. The evolutionary dynamics of  
883 repetitive DNA in eukaryotes. *Nature* 371, 215–220.

884 Charlesworth, B., Jensen, J.D., 2021. Effects of Selection at Linked Sites on Patterns of  
885 Genetic Variability. *Annu. Rev. Ecol. Evol. Syst.* 52, 177–197.  
886 <https://doi.org/10.1146/annurev-ecolsys-010621-044528>

887 Choi, K., Zhao, X., Kelly, K.A., Venn, O., Higgins, J.D., Yelina, N.E., Hardcastle, T.J.,  
888 Ziolkowski, P.A., Copenhaver, G.P., Franklin, F.C.H., McVean, G., Henderson, I.R., 2013.  
889 *Arabidopsis* meiotic crossover hot spots overlap with H2A.Z nucleosomes at gene  
890 promoters. *Nat. Genet.* 45, 1327–1336. <https://doi.org/10.1038/ng.2766>

891 Choi, K., Zhao, X., Tock, A.J., Lambing, C., Underwood, C.J., Hardcastle, T.J., Serra, H.,  
892 Kim, Juhyun, Cho, H.S., Kim, Jaeil, Ziolkowski, P.A., Yelina, N.E., Hwang, I., Martienssen,  
893 R.A., Henderson, I.R., 2018. Nucleosomes and DNA methylation shape meiotic DSB  
894 frequency in *Arabidopsis thaliana* transposons and gene regulatory regions. *Genome Res.*  
895 28, 532–546. <https://doi.org/10.1101/gr.225599.117>

896 Comeron, J.M., 2017. Background selection as null hypothesis in population genomics:  
897 insights and challenges from *Drosophila* studies. *Philos. Trans. R. Soc. B Biol. Sci.* 372,  
898 20160471. <https://doi.org/10.1098/rstb.2016.0471>

899 Cooper, T.J., Garcia, V., Neale, M.J., 2016. Meiotic DSB patterning: A multifaceted  
900 process. *Cell Cycle* 15, 13–21. <https://doi.org/10.1080/15384101.2015.1093709>

901 Corbett-Detig, R.B., Hartl, D.L., Sackton, T.B., 2015. Natural Selection Constrains Neutral  
902 Diversity across A Wide Range of Species. *PLOS Biol.* 13, e1002112.  
903 <https://doi.org/10.1371/journal.pbio.1002112>

904 de Massy, B., 2013. Initiation of Meiotic Recombination: How and Where? Conservation  
905 and Specificities Among Eukaryotes. *Annu. Rev. Genet.* 47, 563–599.  
906 <https://doi.org/10.1146/annurev-genet-110711-155423>

907 Dukić, M., Bomblies, K., 2022. Male and female recombination landscapes of diploid  
908 *Arabidopsis arenosa*. *Genetics* iyab236. <https://doi.org/10.1093/genetics/iyab236>

909 Ellermeier, C., Higuchi, E.C., Phadnis, N., Holm, L., Geelhood, J.L., Thon, G., Smith,  
910 G.R., 2010. RNAi and heterochromatin repress centromeric meiotic recombination. *Proc.*  
911 *Natl. Acad. Sci.* 107, 8701–8705. <https://doi.org/10.1073/pnas.0914160107>

912 Falque, M., Mercier, R., Mézard, C., de Vienne, D., Martin, O.C., 2007. Patterns of  
913 Recombination and MLH1 Foci Density Along Mouse Chromosomes: Modeling Effects of  
914 Interference and Obligate Chiasma. *Genetics* 176, 1453–1467.  
915 <https://doi.org/10.1534/genetics.106.070235>



916 Fernandes, J.B., Wlodzimierz, P., Henderson, I.R., 2019. Meiotic recombination within  
917 plant centromeres. *Curr. Opin. Plant Biol.* 48, 26–35.  
918 <https://doi.org/10.1016/j.pbi.2019.02.008>

919 Ferreira, M.T.M., Glombik, M., Perničková, K., Duchoslav, M., Scholten, O., Karafiátová,  
920 M., Techio, V.H., Doležel, J., Lukaszewski, A.J., Kopecký, D., 2021. Direct evidence for  
921 crossover and chromatid interference in meiosis of two plant hybrids (*Lolium*  
922 *multiflorum* × *Festuca pratensis* and *Allium cepa* × *A. roylei*). *J. Exp. Bot.* 72, 254–267.  
923 <https://doi.org/10.1093/jxb/eraa455>

924 Foss, E., Lande, R., Stahl, F., Steinberg, C., 1993. Chiasma interference as a function of  
925 genetic distance. *Genetics* 133, 681–691.

926 Galtier, N., Roux, C., Rousselle, M., Romiguier, J., Figuet, E., Glémin, S., Bierne, N.,  
927 Duret, L., 2018. Codon Usage Bias in Animals: Disentangling the Effects of Natural  
928 Selection, Effective Population Size, and GC-Biased Gene Conversion. *Mol. Biol. Evol.* 35,  
929 1092–1103. <https://doi.org/10.1093/molbev/msy015>

930 Gaut, B.S., Wright, S.I., Rizzon, C., Dvorak, J., Anderson, L.K., 2007. Recombination: an  
931 underappreciated factor in the evolution of plant genomes. *Nat. Rev. Genet.* 8, 77–84.  
932 <https://doi.org/10.1038/nrg1970>

933 Glémin, S., Clément, Y., David, J., Ressayre, A., 2014. GC content evolution in coding  
934 regions of angiosperm genomes: a unifying hypothesis. *Trends Genet.* 30, 263–270.  
935 <https://doi.org/10.1016/j.tig.2014.05.002>

936 Haenel, Q., Laurentino, T.G., Roesti, M., Berner, D., 2018. Meta-analysis of chromosome-  
937 scale crossover rate variation in eukaryotes and its significance to evolutionary genomics.  
938 *Mol. Ecol.* 27, 2477–2497. <https://doi.org/10.1111/mec.14699>

939 Hall, M.C., Willis, J.H., 2005. Transmission Ratio Distortion in Intraspecific Hybrids of  
940 *Mimulus guttatus*: Implications for Genomic Divergence. *Genetics* 170, 375–386.  
941 <https://doi.org/10.1534/genetics.104.038653>

942 Hartmann, M., Umbanhowar, J., Sekelsky, J., 2019. Centromere-Proximal Meiotic  
943 Crossovers in *Drosophila melanogaster* Are Suppressed by Both Highly Repetitive  
944 Heterochromatin and Proximity to the Centromere. *Genetics* 213, 113–125.  
945 <https://doi.org/10.1534/genetics.119.302509>

946 He, Y., Wang, M., Dukowic-Schulze, S., Zhou, A., Tiang, C.-L., Shilo, S., Sidhu, G.K.,  
947 Eichten, S., Bradbury, P., Springer, N.M., Buckler, E.S., Levy, A.A., Sun, Q., Pillardy, J.,  
948 Kianian, P.M.A., Kianian, S.F., Chen, C., Pawlowski, W.P., 2017. Genomic features shaping  
949 the landscape of meiotic double-strand-break hotspots in maize. *Proc. Natl. Acad. Sci.* 114,  
950 12231–12236. <https://doi.org/10.1073/pnas.1713225114>

951 Higgins, J.D., Perry, R.M., Barakate, A., Ramsay, L., Waugh, R., Halpin, C., Armstrong,  
952 S.J., Franklin, F.C.H., 2012. Spatiotemporal Asymmetry of the Meiotic Program Underlies  
953 the Predominantly Distal Distribution of Meiotic Crossovers in Barley. *Plant Cell* 24, 4096–  
954 4109. <https://doi.org/10.1105/tpc.112.102483>

955 Hinch, A.G., Zhang, G., Becker, P.W., Moralli, D., Hinch, R., Davies, B., Bowden, R.,  
956 Donnelly, P., 2019. Factors influencing meiotic recombination revealed by whole-genome  
957 sequencing of single sperm. *Science* 363, eaau8861.  
958 <https://doi.org/10.1126/science.aau8861>

959 Ives, A., Dinnage, R., Nell, L.A., Helmus, M., Li, D., 2019. phyr: Model based phylogenetic  
960 analysis (manual).

961 Jo, J., Purushotham, P.M., Han, K., Lee, H.-R., Nah, G., Kang, B.-C., 2017. Development  
962 of a Genetic Map for Onion (*Allium cepa* L.) Using Reference-Free Genotyping-by-

963 Sequencing and SNP Assays. *Front. Plant Sci.* 8, 1606.  
964 <https://doi.org/10.3389/fpls.2017.01606>

965 Johnston, S.E., Béréños, C., Slate, J., Pemberton, J.M., 2016. Conserved Genetic  
966 Architecture Underlying Individual Recombination Rate Variation in a Wild Population of  
967 Soay Sheep (*Ovis aries*). *Genetics* 203, 583–598.  
968 <https://doi.org/10.1534/genetics.115.185553>

969 Kent, T.V., Uzunović, J., Wright, S.I., 2017. Coevolution between transposable elements  
970 and recombination. *Philos. Trans. R. Soc. B Biol. Sci.* 372, 20160458.  
971 <https://doi.org/10.1098/rstb.2016.0458>

972 Khrustaleva, L.I., de Melo, P.E., van Heusden, A.W., Kik, C., 2005. The Integration of  
973 Recombination and Physical Maps in a Large-Genome Monocot Using Haploid Genome  
974 Analysis in a Trihybrid *Allium* Population. *Genetics* 169, 1673–1685.  
975 <https://doi.org/10.1534/genetics.104.038687>

976 Kianian, P.M.A., Wang, M., Simons, K., Ghavami, F., He, Y., Dukowic-Schulze, S.,  
977 Sundararajan, A., Sun, Q., Pillardy, J., Mudge, J., Chen, C., Kianian, S.F., Pawlowski, W.P.,  
978 2018. High-resolution crossover mapping reveals similarities and differences of male and  
979 female recombination in maize. *Nat. Commun.* 9, 2370. [https://doi.org/10.1038/s41467-018-](https://doi.org/10.1038/s41467-018-04562-5)  
980 [04562-5](https://doi.org/10.1038/s41467-018-04562-5)

981 Kleckner, N., Zickler, D., Jones, G.H., Dekker, J., Padmore, R., Henle, J., Hutchinson, J.,  
982 2004. A mechanical basis for chromosome function. *Proc. Natl. Acad. Sci.* 101, 12592–  
983 12597. <https://doi.org/10.1073/pnas.0402724101>

984 Kuo, P., Da Ines, O., Lambing, C., 2021. Rewiring Meiosis for Crop Improvement. *Front.*  
985 *Plant Sci.* 12, 708948. <https://doi.org/10.3389/fpls.2021.708948>

986 Kuznetsova, A., Brockhoff, P.B., Christensen, R.H.B., 2017. lmerTest package: Tests in  
987 linear mixed effects models. *J. Stat. Softw.* 82, 1–26. <https://doi.org/10.18637/jss.v082.i13>

988 Lambing, C., Kuo, P.C., Tock, A.J., Topp, S.D., Henderson, I.R., 2020. ASY1 acts as a  
989 dosage-dependent antagonist of telomere-led recombination and mediates crossover  
990 interference in *Arabidopsis*. *Proc. Natl. Acad. Sci.* 117, 13647–13658.  
991 <https://doi.org/10.1073/pnas.1921055117>

992 Lenormand, T., Engelstädter, J., Johnston, S.E., Wijnker, E., Haag, C.R., 2016.  
993 Evolutionary mysteries in meiosis. *Philos. Trans. R. Soc. B Biol. Sci.* 371, 20160001.  
994 <https://doi.org/10.1098/rstb.2016.0001>

995 Lloyd, A., Jenczewski, E., 2019. Modelling Sex-Specific Crossover Patterning in  
996 *Arabidopsis*. *Genetics* 211, 847–859. <https://doi.org/10.1534/genetics.118.301838>

997 Lukaszewski, A.J., 2008. Unexpected behavior of an inverted rye chromosome arm in  
998 wheat. *Chromosoma* 117, 569–578. <https://doi.org/10.1007/s00412-008-0174-4>

999 Lukaszewski, A.J., Kopecky, D., Linc, G., 2012. Inversions of chromosome arms 4AL and  
1000 2BS in wheat invert the patterns of chiasma distribution. *Chromosoma* 121, 201–208.  
1001 <https://doi.org/10.1007/s00412-011-0354-5>

1002 Marand, A.P., Zhao, H., Zhang, W., Zeng, Z., Fang, C., Jiang, J., 2019. Historical Meiotic  
1003 Crossover Hotspots Fueled Patterns of Evolutionary Divergence in Rice. *Plant Cell* 31, 645–  
1004 662. <https://doi.org/10.1105/tpc.18.00750>

1005 Mayer, K.F.X., Martis, M., Hedley, P.E., Šimková, H., Liu, H., Morris, J.A., Steuernagel,  
1006 B., Taudien, S., Roessner, S., Gundlach, H., Kubaláková, M., Suchánková, P., Murat, F.,  
1007 Felder, M., Nussbaumer, T., Graner, A., Salse, J., Endo, T., Sakai, H., Tanaka, T., Itoh, T.,  
1008 Sato, K., Platzer, M., Matsumoto, T., Scholz, U., Doležel, J., Waugh, R., Stein, N., 2011.  
1009 Unlocking the Barley Genome by Chromosomal and Comparative Genomics. *Plant Cell* 23,  
1010 1249–1263. <https://doi.org/10.1105/tpc.110.082537>

1011 Melamed-Bessudo, C., Shilo, S., Levy, A.A., 2016. Meiotic recombination and genome  
1012 evolution in plants. *Curr. Opin. Plant Biol.* 30, 82–87.  
1013 <https://doi.org/10.1016/j.pbi.2016.02.003>

1014 Mézard, C., Tagliaro Jahns, M., Grelon, M., 2015. Where to cross? New insights into the  
1015 location of meiotic crossovers. *Trends Genet.* 31, 393–401.  
1016 <https://doi.org/10.1016/j.tig.2015.03.008>

1017 Nachman, M.W., Payseur, B.A., 2012. Recombination rate variation and speciation:  
1018 theoretical predictions and empirical results from rabbits and mice. *Philos. Trans. R. Soc. B*  
1019 *Biol. Sci.* 367, 409–421. <https://doi.org/10.1098/rstb.2011.0249>

1020 Nam, K., Ellegren, H., 2012. Recombination Drives Vertebrate Genome Contraction.  
1021 *PLoS Genet.* 8, e1002680. <https://doi.org/10.1371/journal.pgen.1002680>

1022 Osman, K., Algopishi, U., Higgins, J.D., Henderson, I.R., Edwards, K.J., Franklin, F.C.H.,  
1023 Sanchez-Moran, E., 2021. Distal Bias of Meiotic Crossovers in Hexaploid Bread Wheat  
1024 Reflects Spatio-Temporal Asymmetry of the Meiotic Program. *Front. Plant Sci.* 12, 631323.  
1025 <https://doi.org/10.3389/fpls.2021.631323>

1026 Otto, S.P., 2009. The Evolutionary Enigma of Sex. *Am. Nat.* 174, S1–S14.  
1027 <https://doi.org/10.1086/599084>

1028 Otto, S.P., Payseur, B.A., 2019. Crossover Interference: Shedding Light on the Evolution  
1029 of Recombination. *Annu. Rev. Genet.* 53, 19–44. [https://doi.org/10.1146/annurev-genet-](https://doi.org/10.1146/annurev-genet-040119-093957)  
1030 [040119-093957](https://doi.org/10.1146/annurev-genet-040119-093957)

1031 Pan, J., Sasaki, M., Kniewel, R., Murakami, H., Blitzblau, H.G., Tischfield, S.E., Zhu, X.,  
1032 Neale, M.J., Jasin, M., Socci, N.D., Hochwagen, A., Keeney, S., 2011. A Hierarchical  
1033 Combination of Factors Shapes the Genome-wide Topography of Yeast Meiotic  
1034 Recombination Initiation. *Cell* 144, 719–731. <https://doi.org/10.1016/j.cell.2011.02.009>

1035 Pan, Q., Li, L., Yang, X., Tong, H., Xu, S., Li, Z., Li, W., Muehlbauer, G.J., Li, J., Yan, J.,  
1036 2016. Genome-wide recombination dynamics are associated with phenotypic variation in  
1037 maize. *New Phytol.* 210, 1083–1094. <https://doi.org/10.1111/nph.13810>

1038 Pazhayam, N.M., Turcotte, C.A., Sekelsky, J., 2021. Meiotic Crossover Patterning. *Front.*  
1039 *Cell Dev. Biol.* 9, 681123. <https://doi.org/10.3389/fcell.2021.681123>

1040 Pellicer, J., Hidalgo, O., Dodsworth, S., Leitch, I., 2018. Genome Size Diversity and Its  
1041 Impact on the Evolution of Land Plants. *Genes* 9, 88. <https://doi.org/10.3390/genes9020088>

1042 R Core Team, 2019. R: A Language and Environment for Statistical Computing. R  
1043 Foundation for Statistical Computing, Vienna, Austria.

1044 Rezvoy, C., Charif, D., Gueguen, L., Marais, G.A.B., 2007. MareyMap: an R-based tool  
1045 with graphical interface for estimating recombination rates. *Bioinformatics* 23, 2188–2189.  
1046 <https://doi.org/10.1093/bioinformatics/btm315>

1047 Ritz, K.R., Noor, M.A.F., Singh, N.D., 2017. Variation in Recombination Rate: Adaptive or  
1048 Not? *Trends Genet.* 33, 364–374. <https://doi.org/10.1016/j.tig.2017.03.003>

1049 Sandhu, D., Gill, K.S., 2002. Gene-Containing Regions of Wheat and the Other Grass  
1050 Genomes. *Plant Physiol.* 128, 803–811. <https://doi.org/10.1104/pp.010745>

1051 Sardell, J.M., Kirkpatrick, M., 2019. Sex differences in the recombination landscape. *Am.*  
1052 *Nat.* 704943. <https://doi.org/10.1086/704943>

1053 Shahin, A., Arens, P., Van Heusden, A.W., Van Der Linden, G., Van Kaauwen, M., Khan,  
1054 N., Schouten, H.J., Van De Weg, W.E., Visser, R.G.F., Van Tuyl, J.M., 2011. Genetic  
1055 mapping in *Lilium*: mapping of major genes and quantitative trait loci for several ornamental  
1056 traits and disease resistances. *Plant Breed.* 130, 372–382. <https://doi.org/10.1111/j.1439->  
1057 [0523.2010.01812.x](https://doi.org/10.1111/j.1439-0523.2010.01812.x)

1058 Shi, T., Rahmani, R.S., Gugger, P.F., Wang, M., Li, H., Zhang, Y., Li, Z., Wang, Q., Van  
1059 de Peer, Y., Marchal, K., Chen, J., 2020. Distinct Expression and Methylation Patterns for  
1060 Genes with Different Fates following a Single Whole-Genome Duplication in Flowering  
1061 Plants. *Mol. Biol. Evol.* 37, 2394–2413. <https://doi.org/10.1093/molbev/msaa105>

1062 Smith, S.A., Brown, J.W., 2018. Constructing a broadly inclusive seed plant phylogeny.  
1063 *Am. J. Bot.* 105, 302–314. <https://doi.org/10.1002/ajb2.1019>

1064 Soltis, P.S., Marchant, D.B., Van de Peer, Y., Soltis, D.E., 2015. Polyploidy and genome  
1065 evolution in plants. *Curr. Opin. Genet. Dev.* 35, 119–125.  
1066 <https://doi.org/10.1016/j.gde.2015.11.003>

1067 Stapley, J., Feulner, P.G.D., Johnston, S.E., Santure, A.W., Smadja, C.M., 2017.  
1068 Variation in recombination frequency and distribution across eukaryotes: patterns and  
1069 processes. *Philos. Trans. R. Soc. B Biol. Sci.* 372, 20160455.  
1070 <https://doi.org/10.1098/rstb.2016.0455>

1071 Tiley, G.P., Burleigh, J.G., 2015. The relationship of recombination rate, genome  
1072 structure, and patterns of molecular evolution across angiosperms. *BMC Evol. Biol.* 15, 194.  
1073 <https://doi.org/10.1186/s12862-015-0473-3>

1074 Underwood, C.J., Choi, K., 2019. Heterogeneous transposable elements as silencers,  
1075 enhancers and targets of meiotic recombination. *Chromosoma* 128, 279–296.  
1076 <https://doi.org/10.1007/s00412-019-00718-4>

1077 Veller, C., Kleckner, N., Nowak, M.A., 2019. A rigorous measure of genome-wide genetic  
1078 shuffling that takes into account crossover positions and Mendel’s second law. *Proc. Natl.*  
1079 *Acad. Sci.* 116, 1659–1668. <https://doi.org/10.1073/pnas.1817482116>

1080 Wang, S., Zickler, D., Kleckner, N., Zhang, L., 2015. Meiotic crossover patterns:  
1081 Obligatory crossover, interference and homeostasis in a single process. *Cell Cycle* 14, 305–  
1082 314. <https://doi.org/10.4161/15384101.2014.991185>

1083 Wang, Y., Copenhaver, G.P., 2018. Meiotic Recombination: Mixing It Up in Plants. *Annu.*  
1084 *Rev. Plant Biol.* 69, 577–609. <https://doi.org/10.1146/annurev-arplant-042817-040431>

1085 Wei, C., Yang, H., Wang, S., Zhao, J., Liu, C., Gao, L., Xia, E., Lu, Y., Tai, Y., She, G.,  
1086 Sun, J., Cao, H., Tong, W., Gao, Q., Li, Y., Deng, W., Jiang, X., Wang, W., Chen, Q., Zhang,  
1087 S., Li, H., Wu, J., Wang, P., Li, P., Shi, C., Zheng, F., Jian, J., Huang, B., Shan, D., Shi, M.,  
1088 Fang, C., Yue, Y., Li, F., Li, D., Wei, S., Han, B., Jiang, C., Yin, Y., Xia, T., Zhang, Z.,  
1089 Bennetzen, J.L., Zhao, S., Wan, X., 2018. Draft genome sequence of *Camellia sinensis* var.  
1090 *sinensis* provides insights into the evolution of the tea genome and tea quality. *Proc. Natl.*  
1091 *Acad. Sci.* 115, E4151–E4158. <https://doi.org/10.1073/pnas.1719622115>

1092 White, I.M.S., Hill, W.G., 2020. Effect of heterogeneity in recombination rate on variation  
1093 in realised relationship. *Heredity* 124, 28–36. <https://doi.org/10.1038/s41437-019-0241-z>

1094 Yelina, N.E., Choi, K., Chelysheva, L., Macaulay, M., de Snoo, B., Wijnker, E., Miller, N.,  
1095 Drouaud, J., Grelon, M., Copenhaver, G.P., Mezard, C., Kelly, K.A., Henderson, I.R., 2012.  
1096 Epigenetic Remodeling of Meiotic Crossover Frequency in *Arabidopsis thaliana* DNA  
1097 Methyltransferase Mutants. *PLoS Genet.* 8, e1002844.  
1098 <https://doi.org/10.1371/journal.pgen.1002844>

1099 Zelkowski, M., Olson, M.A., Wang, M., Pawlowski, W., 2019. Diversity and Determinants  
1100 of Meiotic Recombination Landscapes. *Trends Genet.* 35, 359–370.  
1101 <https://doi.org/10.1016/j.tig.2019.02.002>

1102 Zhang, L., Liang, Z., Hutchinson, J., Kleckner, N., 2014. Crossover Patterning by the  
1103 Beam-Film Model: Analysis and Implications. *PLoS Genet.* 10, e1004042.  
1104 <https://doi.org/10.1371/journal.pgen.1004042>

1105 Zickler, D., Kleckner, N., 2015. Recombination, Pairing, and Synapsis of Homologs during  
1106 Meiosis. *Cold Spring Harb. Perspect. Biol.* 7, a016626.  
1107 <https://doi.org/10.1101/cshperspect.a016626>



## 1108 Supporting information

1109 Fig S1. Markers positions in genetic distance (cM) as a function of genomic distance  
1110 (Mb), namely Mary maps, for each chromosome included in the dataset ( $n = 665$   
1111 chromosomes). The black vertical line is the centromere position estimated by cytological  
1112 measures, when available in the literature.

1113 Fig S2. Recombination landscapes for each chromosome included in the dataset ( $n = 665$   
1114 chromosomes). Recombination rate (cM/Mb) estimated in windows of 100kb along genomic  
1115 distances (Mb). Confidence interval at 95% (grey ribbon) estimated by 1,000 bootstraps of  
1116 loci. The black vertical line is the centromere position estimated by cytological measures,  
1117 when available in the literature.

1118 Fig S3. Phylogenetic tree of species in our dataset ( $n = 57$ ), annotated with mean  
1119 recombination rate (cM/Mb) and mean chromosome size (Mb). The supertree was retrieved  
1120 from the publicly available phylogeny constructed by Smith and Brown (Smith & Brown,  
1121 2018).

1122 Fig S4. Slopes of the linear regression within species (linkage map length ~ chromosome  
1123 size) as a function of the species mean genomic chromosome size (Mb).

1124 Fig S5. The negative correlation (Spearman's Rho coefficient) between recombination  
1125 rates (cM/Mb) and the distance to the nearest telomere is stronger for species with a larger  
1126 chromosome size ( $n = 57$ ). The linear regression line and its parametric 95% confidence  
1127 interval were estimated in ggplot2. The inset presents the distribution of Spearman's Rho  
1128 coefficients for chromosomes ( $n = 665$  chromosomes). The mean correlation and its 95%  
1129 confidence interval (black solid and dashed lines) were estimated by 1,000 bootstraps. The  
1130 red vertical line is for a null correlation.

1131 Fig S6. Standardized recombination rate (cM/Mb) as a function of the relative distance  
1132 (Mb) from the telomere along the chromosome (physical distances expressed in 20 bins).

1133 Chromosomes were split in halves, a relative distance of 0.5 being the centre of the  
1134 chromosome, and only one side was randomly sampled to avoid averaging patterns. Then,  
1135 chromosomes were pooled per species. Each colour is a species. A loess regression was  
1136 estimated for each species. Species presented in four plots for clarity.

1137 Fig S7. Standardized gene count as a function of the relative distance (Mb) from the  
1138 telomere along the chromosome (physical distances expressed in 20 bins). Chromosomes  
1139 were split in halves, a relative distance of 0.5 being the centre of the chromosome, and only  
1140 one side was randomly sampled to avoid averaging patterns. Then, chromosomes were  
1141 pooled per species. Each colour is a species. A loess regression was estimated for each  
1142 species. Species presented in four plots for clarity.

1143 Fig S8. The genetic shuffling  $\bar{r}_{intra}$  increases with the size of the genetic map (cM). Linear  
1144 mixed regression with a species random effect and its 95% confidence interval estimated by  
1145 ggplot2 (black line and grey ribbon). Each colour is a species. A linear regression was  
1146 estimated for each species.

1147 Fig S9. The genetic shuffling  $\bar{r}_{intra}$  decreases with the periphery-bias ratio. Linear mixed  
1148 regression with a species random effect and its 95% confidence interval estimated by  
1149 ggplot2 (black line and grey ribbon). Each colour is a species. A linear regression was  
1150 estimated for each species.

1151 FigS10. Gene count in windows of 100kb along genomic distances (Mb) for each  
1152 chromosome with gene annotations (n = 480 chromosomes). Recombination rate (cM/Mb)  
1153 estimated in windows of 100kb . Loess regression of gene count along the chromosome in  
1154 blue line with parametric confidence interval at 95% in grey.

1155 Fig S11. Marey maps with genomic distances (black points) and gene distances (gray  
1156 points). Markers positions in genetic distance (cM) as a function of the relative physical  
1157 distance (either Mb or cumulative number of genes) for each chromosome with gene  
1158 annotations (n = 480 chromosomes). The black dashed line is a theoretical uniform

1159 distribution of markers. The black vertical line is the centromere position estimated by  
1160 cytological measures, when available in the literature.

1161 Fig S12. Sensitivity of the periphery-bias ratio to the size of the sampled distal region (i.e.  
1162 number of bins sampled at the tips). The periphery-bias ratio was estimated for different  
1163 numbers of bins sampled and always divided by the mean chromosomal recombination rate.  
1164 Linear regression (black line) shows a decrease of the periphery-bias ratio as the number of  
1165 bins increases, towards a ratio value of 1 (dashed line).

1166 Table S1. Metadata for 665 recombination landscapes, with name of the dataset collected  
1167 and literal name of the chromosome used in our study, chromosome name in annotation  
1168 (gff), size of the genetic map (cM, raw and corrected by methods of Chakravarti et al. (1991)  
1169 or Hal & Willis (2005)), size of the genomic sequence in genome assembly (Mb), number of  
1170 markers, density of markers in cM and bp, mean interval between markers in cM and bp,  
1171 span parameter of the loess function, type of mapping function (Haldane, Kosambi or none),  
1172 accession of the reference genome used for markers genomic positions, link to data  
1173 repository and doi reference of the study in which the genetic map was published.

1174 Table S2. Flowering plant species included in the study, with authors, year and doi  
1175 reference of the genetic map publication, and accession of the reference genome.

1176 Table S3. Centromeric indexes estimated in cytological studies, with unit of  
1177 measurement, mean and standard error of long and short chromosome arms, centromeric  
1178 index (ratio of short arm length divided by total chromosome length), and doi reference to the  
1179 original study.

1180 Table S4. Correlation between recombination landscapes estimated at two different  
1181 genomic scales (1Mb and 100kb). Spearman's Rho coefficient was estimated for each  
1182 chromosome between recombination rates estimated directly in windows of 1Mb and the  
1183 mean recombination rate of 100kb windows pooled together in 1Mb windows. Mean of the  
1184 Spearman's Rho coefficient among chromosomes and proportion of significant p-values  
1185 given for each species.

1186 Table S5. Selection of the regression model between LM, LMER and PGLMM which  
1187 explains best the relationship between the mean recombination rate (cM/Mb) and the  
1188 chromosome size (Mb), based on AIC and BIC criteria.

1189 Table S6. Species averaged correlation between the averaged chromosome size (Mb)  
1190 and the averaged periphery-bias ratio. Mean of the Spearman's Rho coefficient among

1191 correlations at chromosome scale and proportion of significant p-values given for each  
1192 species.

1193 Table S7. Chromosome correlation between the recombination rate (cM/Mb) and the  
1194 relative distance to the telomere, with Spearman's Rho coefficient and p-value of the test per  
1195 chromosome.

1196 Table S8. Species averaged correlation between the recombination rate (cM/Mb) and the  
1197 relative distance to the telomere. Mean of the Spearman's Rho coefficient among  
1198 correlations at chromosome scale and proportion of significant p-values given for each  
1199 species.

1200 Table S9. Selection of the best model of crossover distribution for each species, based on  
1201 Adjusted R-Squared between observed values and theoretical values predicted by the  
1202 model. The best model selected for each species is the one maximizing the Adjusted R-  
1203 Squared.

1204 Table S10. Selection of the best model of crossover distribution for each species in a  
1205 subset of chromosomes with at least 50cM on each chromosome arm, based on Adjusted R-  
1206 Squared between observed values and theoretical values predicted by model. The best  
1207 model selected for each species is the one maximizing the Adjusted R-Squared.

1208 Table S11. Convergence between crossover patterns and gene patterns at a species  
1209 scale. For each species is given the type of crossover pattern, the type of gene count  
1210 pattern, the difference  $RMSE(\text{gene pattern}) - RMSE(\text{crossover pattern})$  which indicates how  
1211 gene patterns are more/less homogeneous than crossover patterns, the homogenization  
1212 effect of gene patterns (more/less), the difference  $\text{genetic shuffling}(\text{gene pattern}) - \text{genetic}$   
1213  $\text{shuffling}(\text{crossover pattern})$  and the averaged chromosome size (Mb).

1214 Data S1. References for linkage map data included in this study.

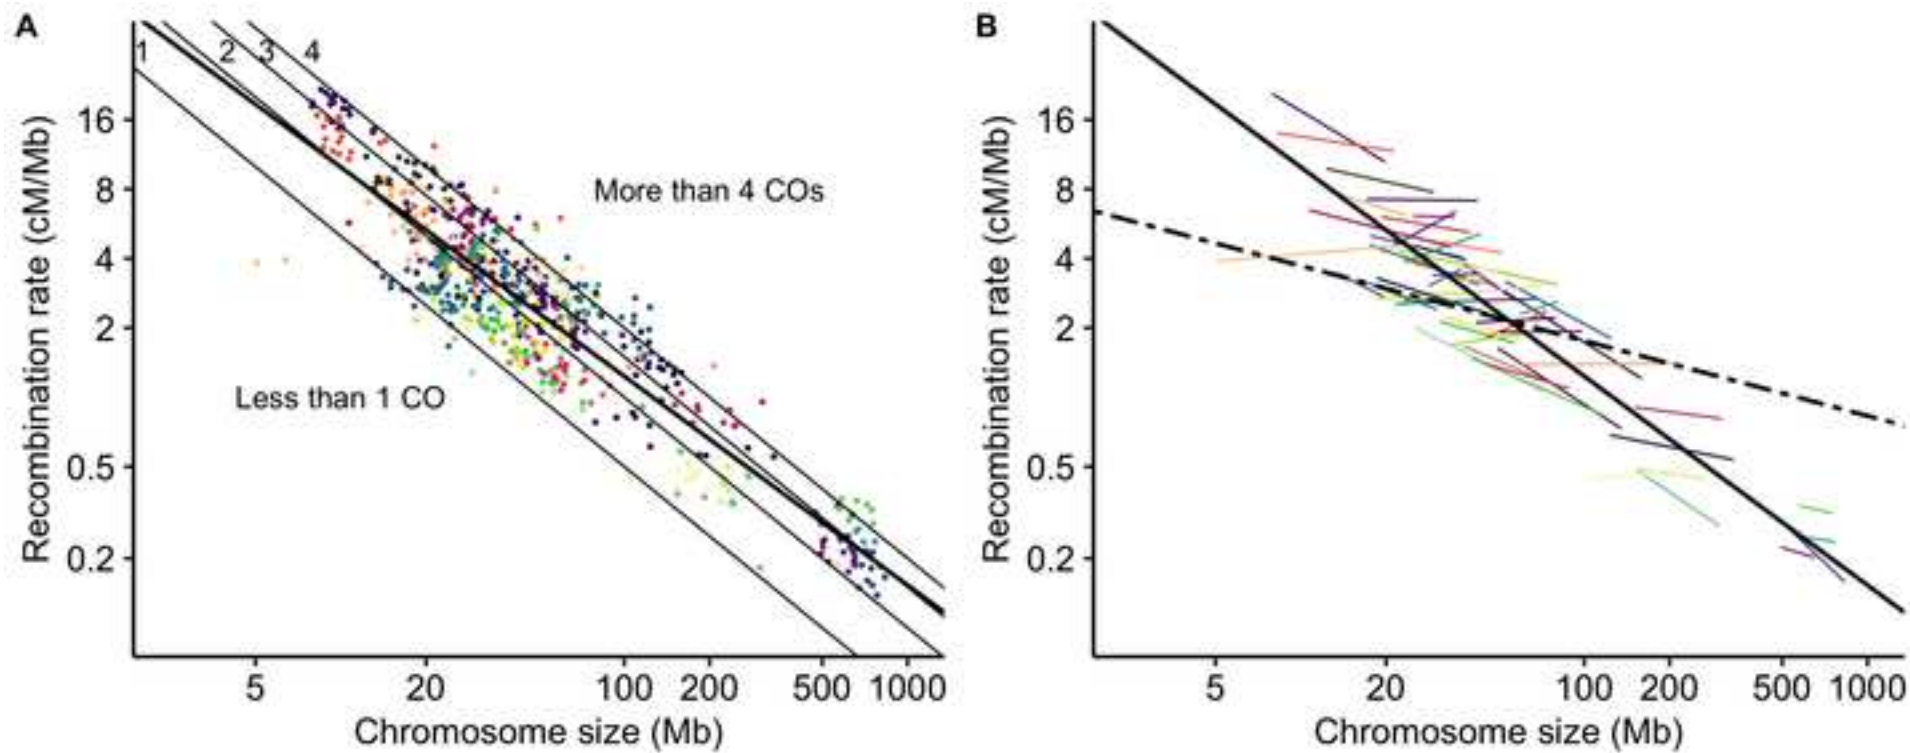

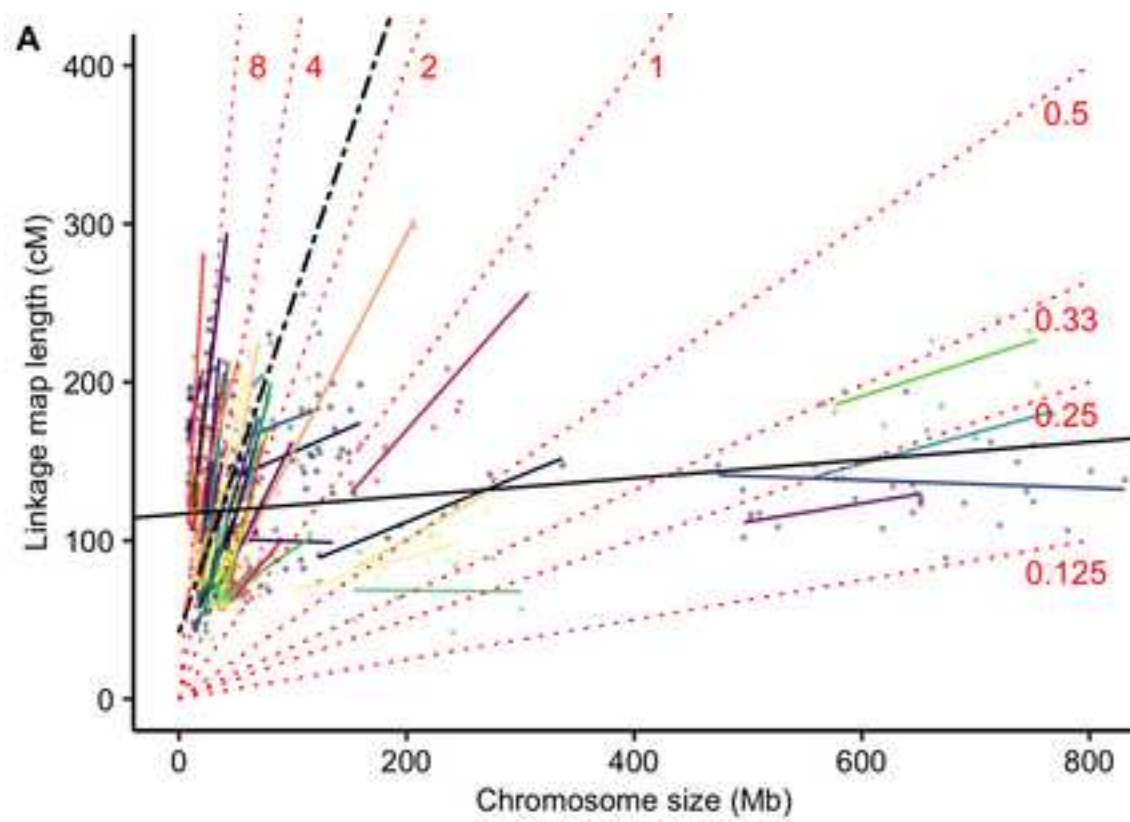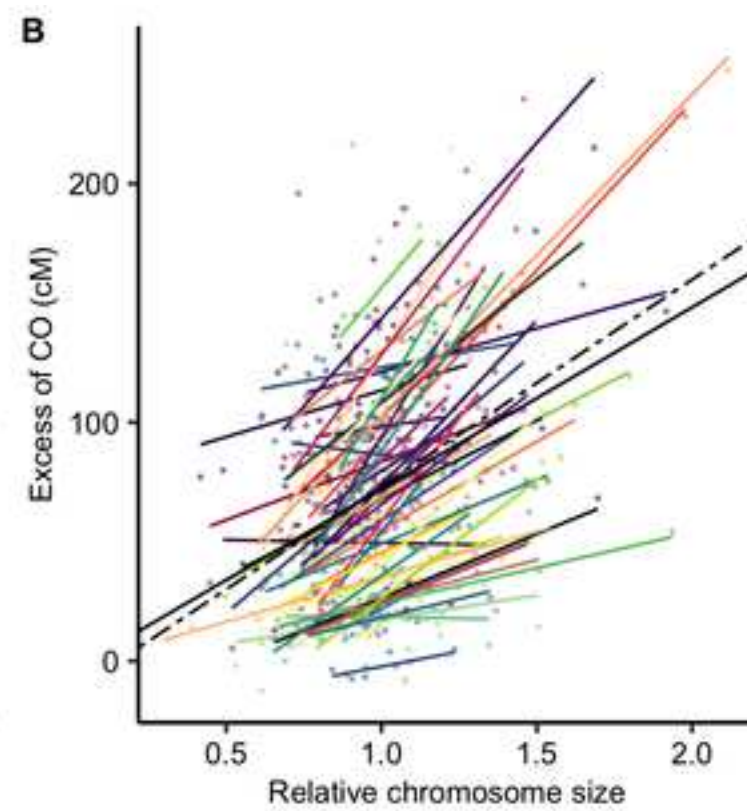

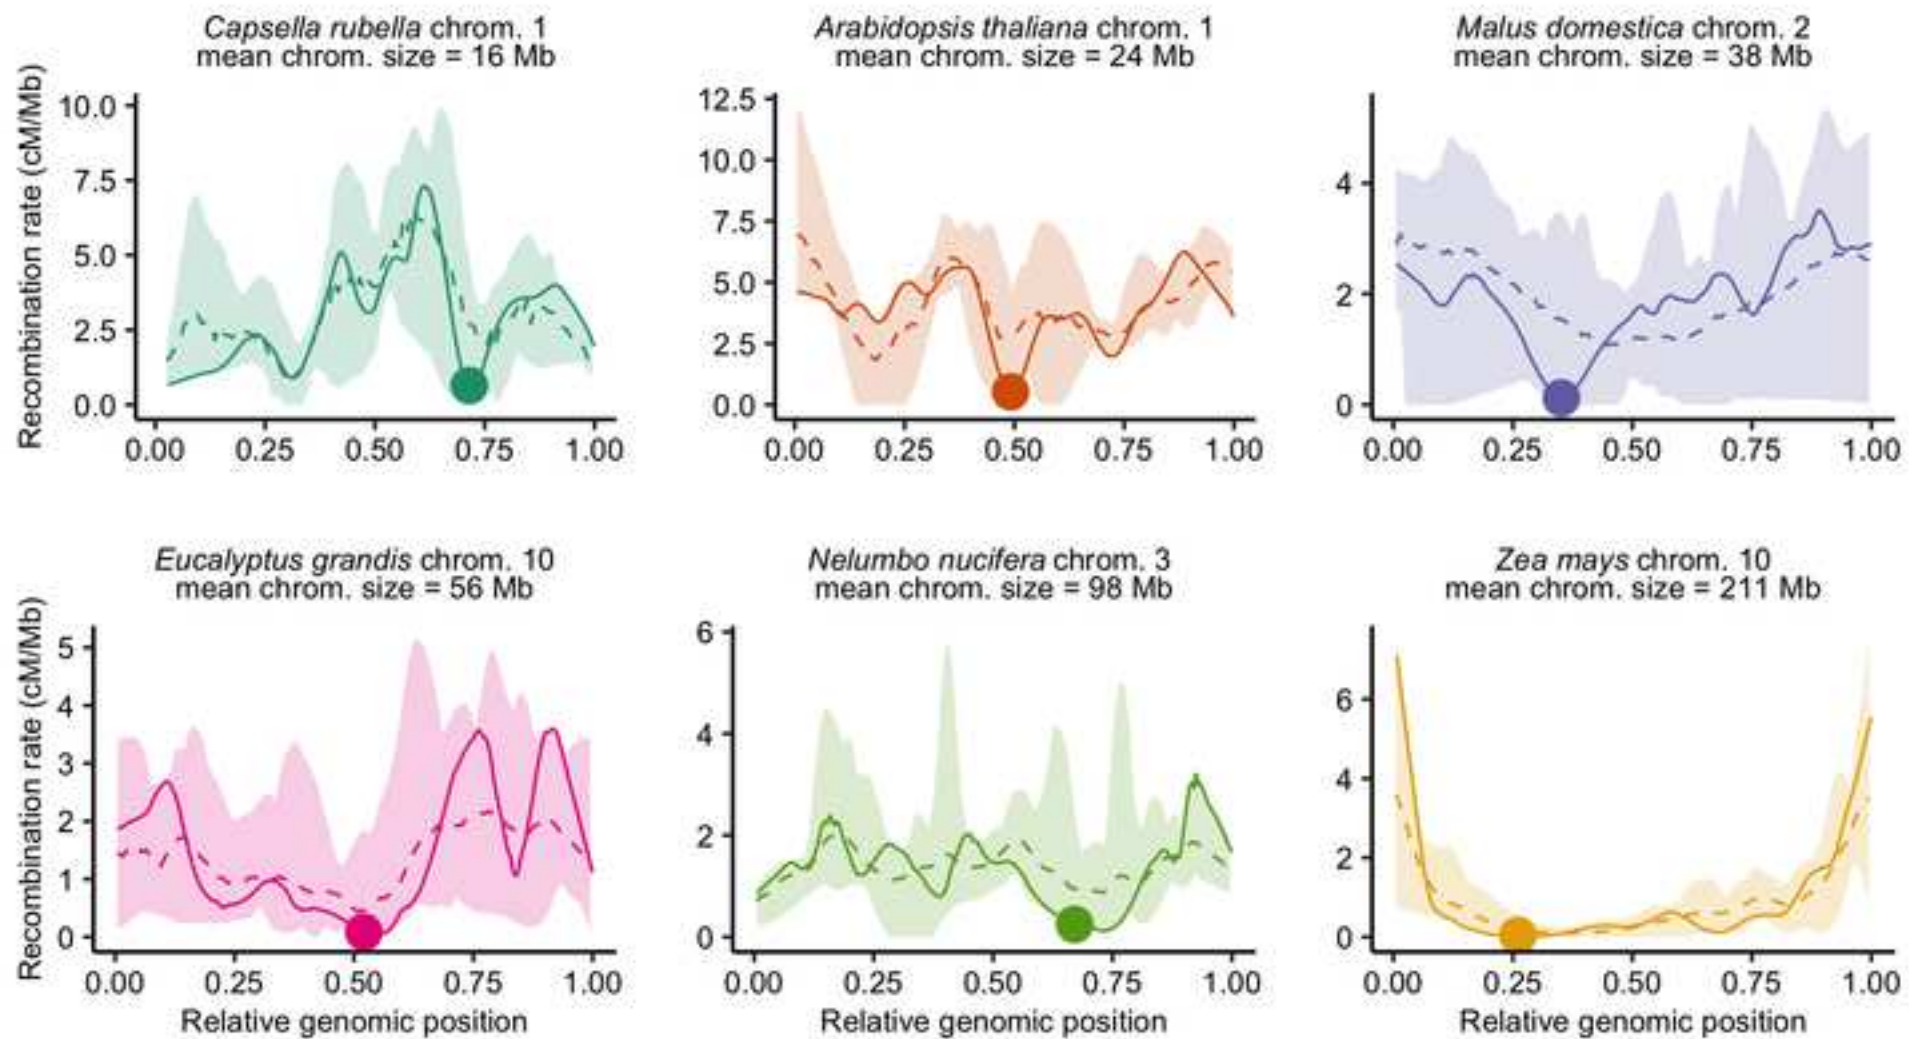



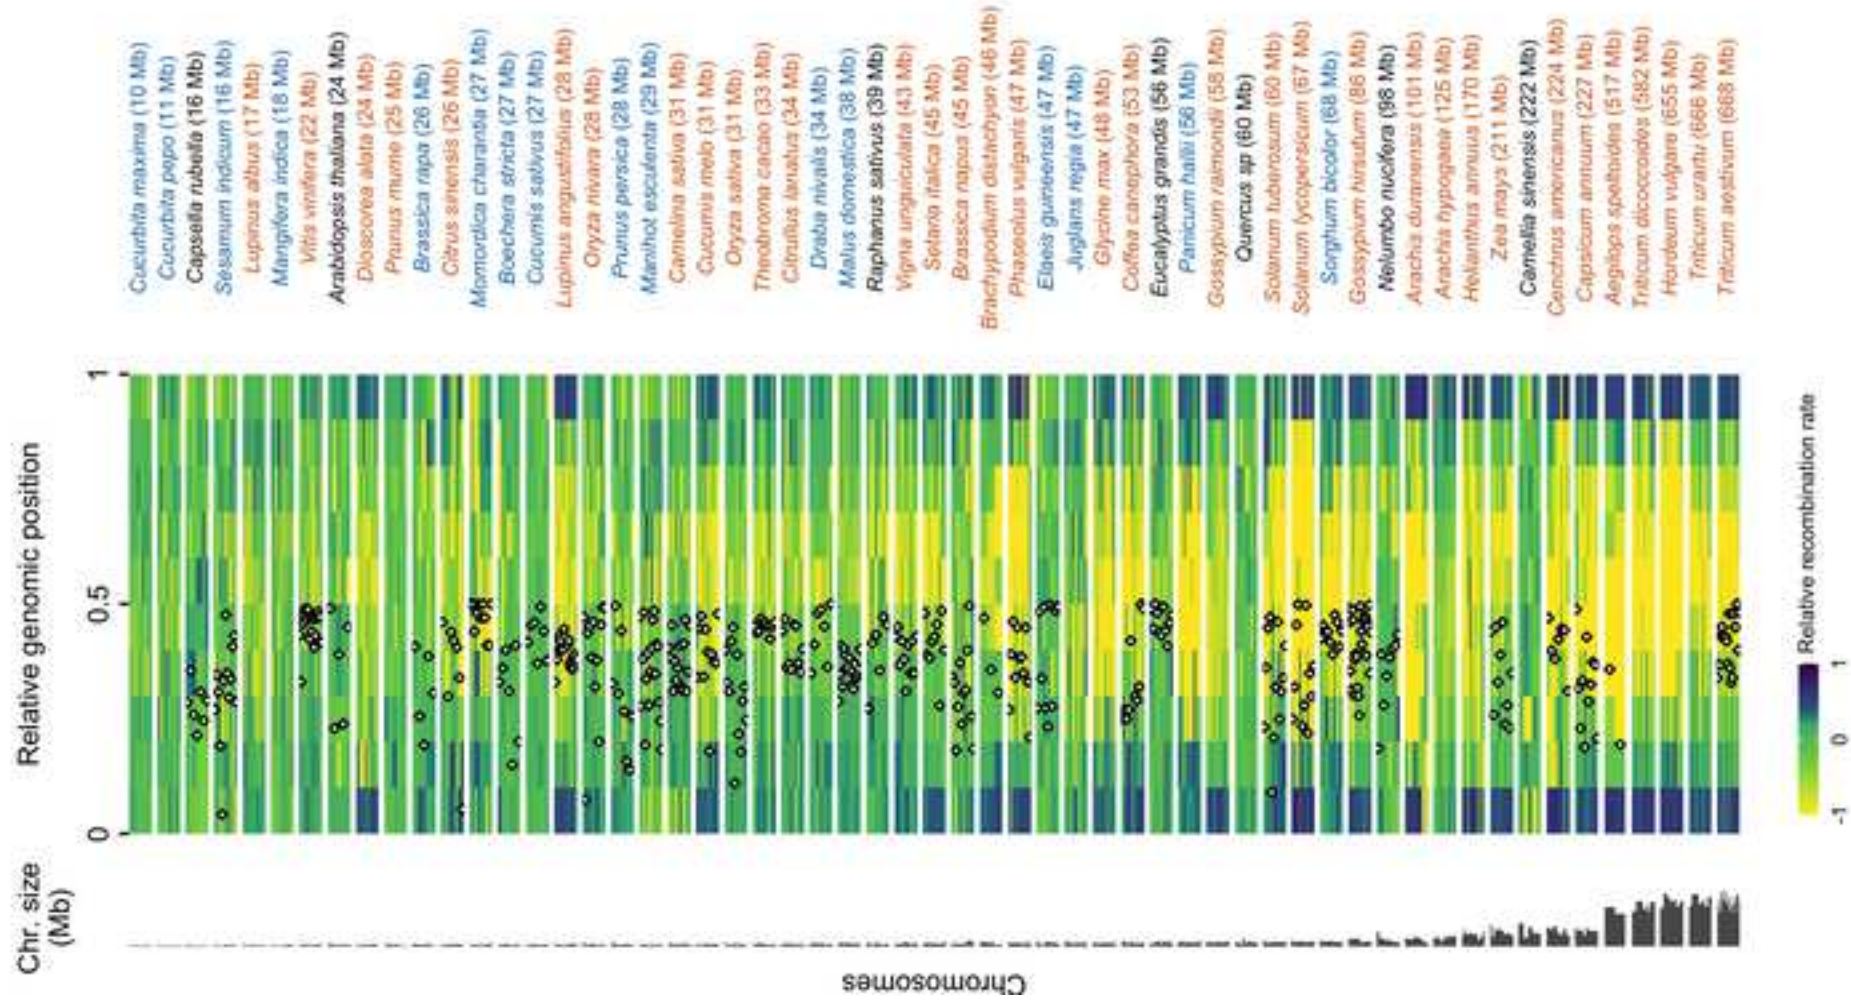

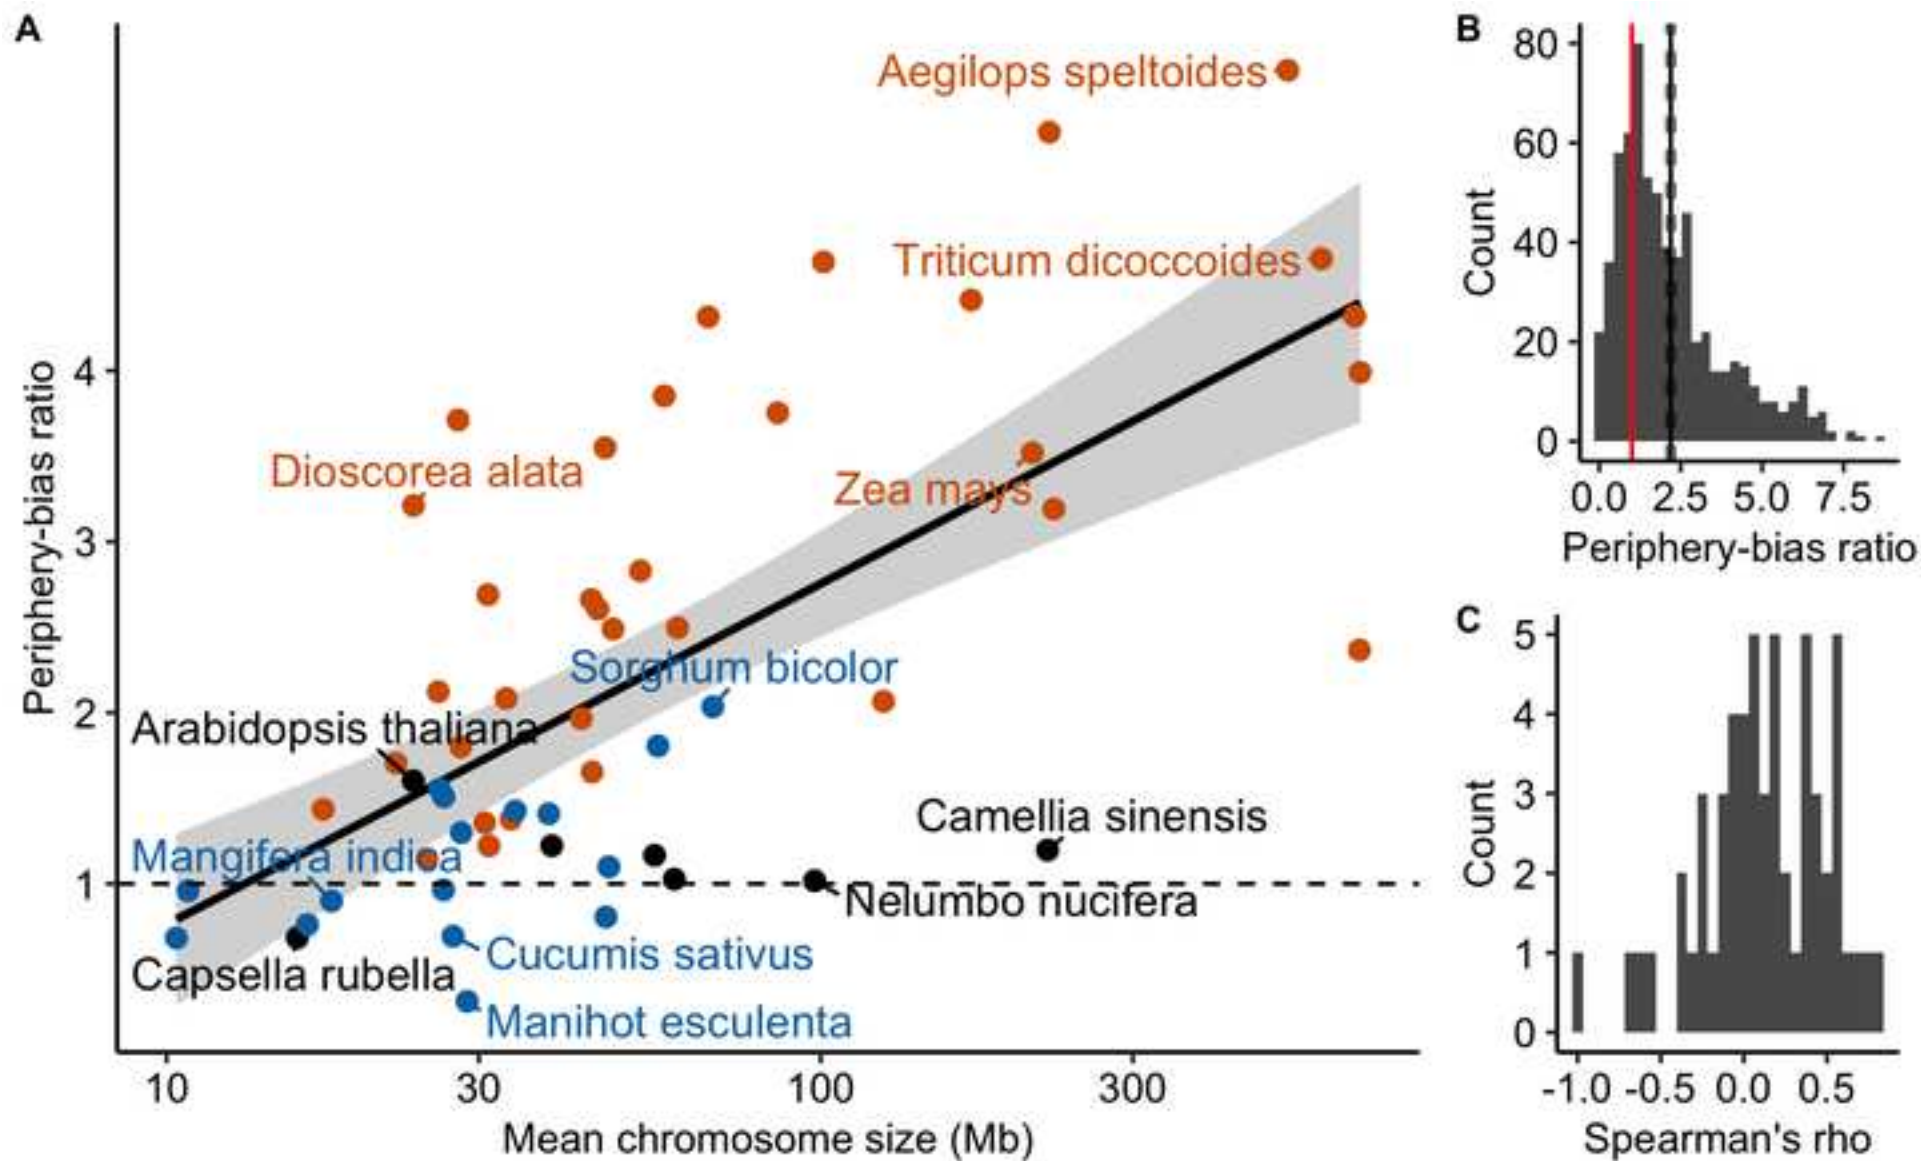

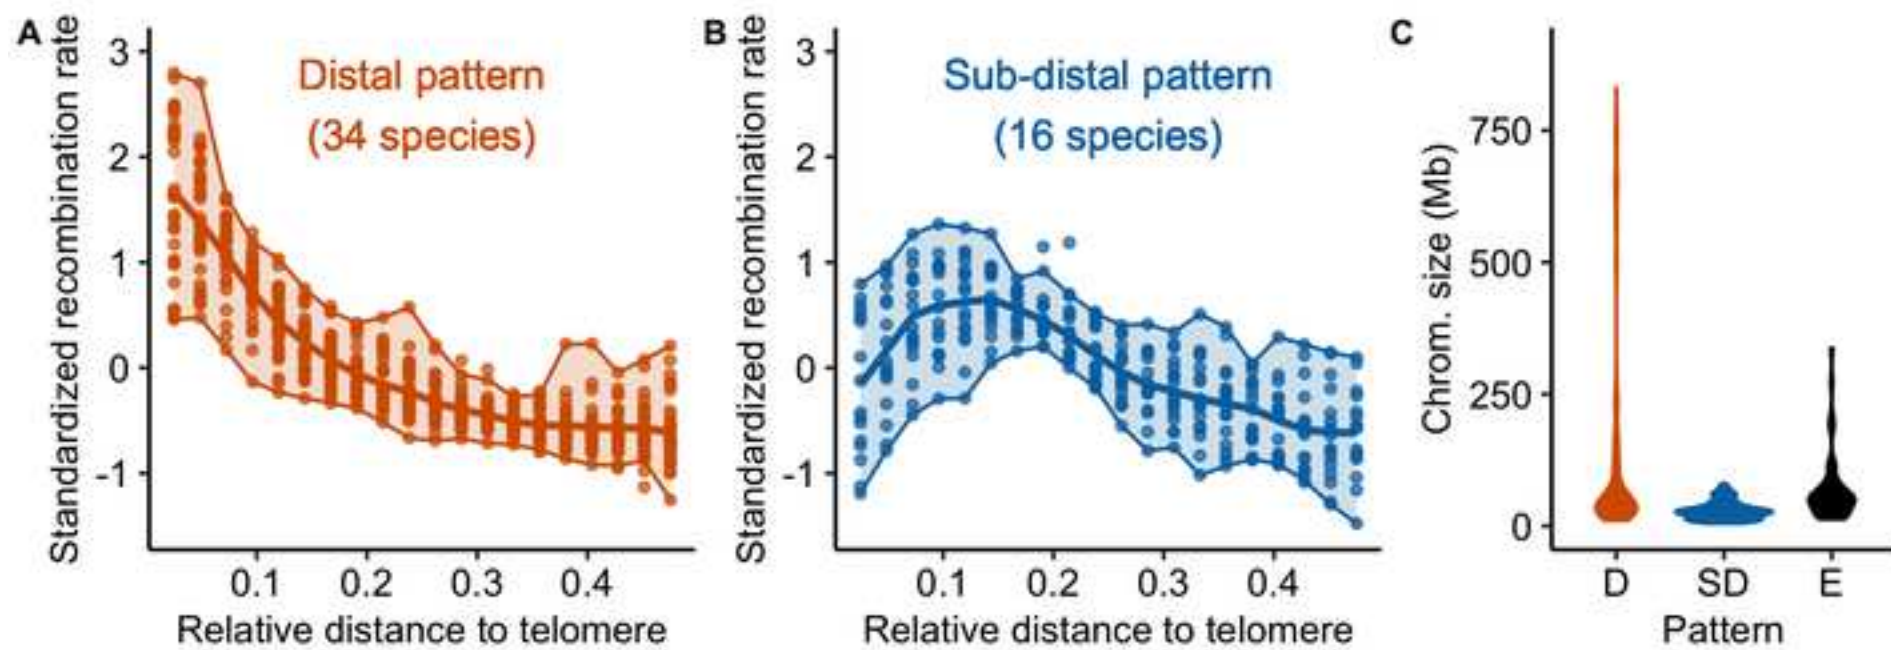

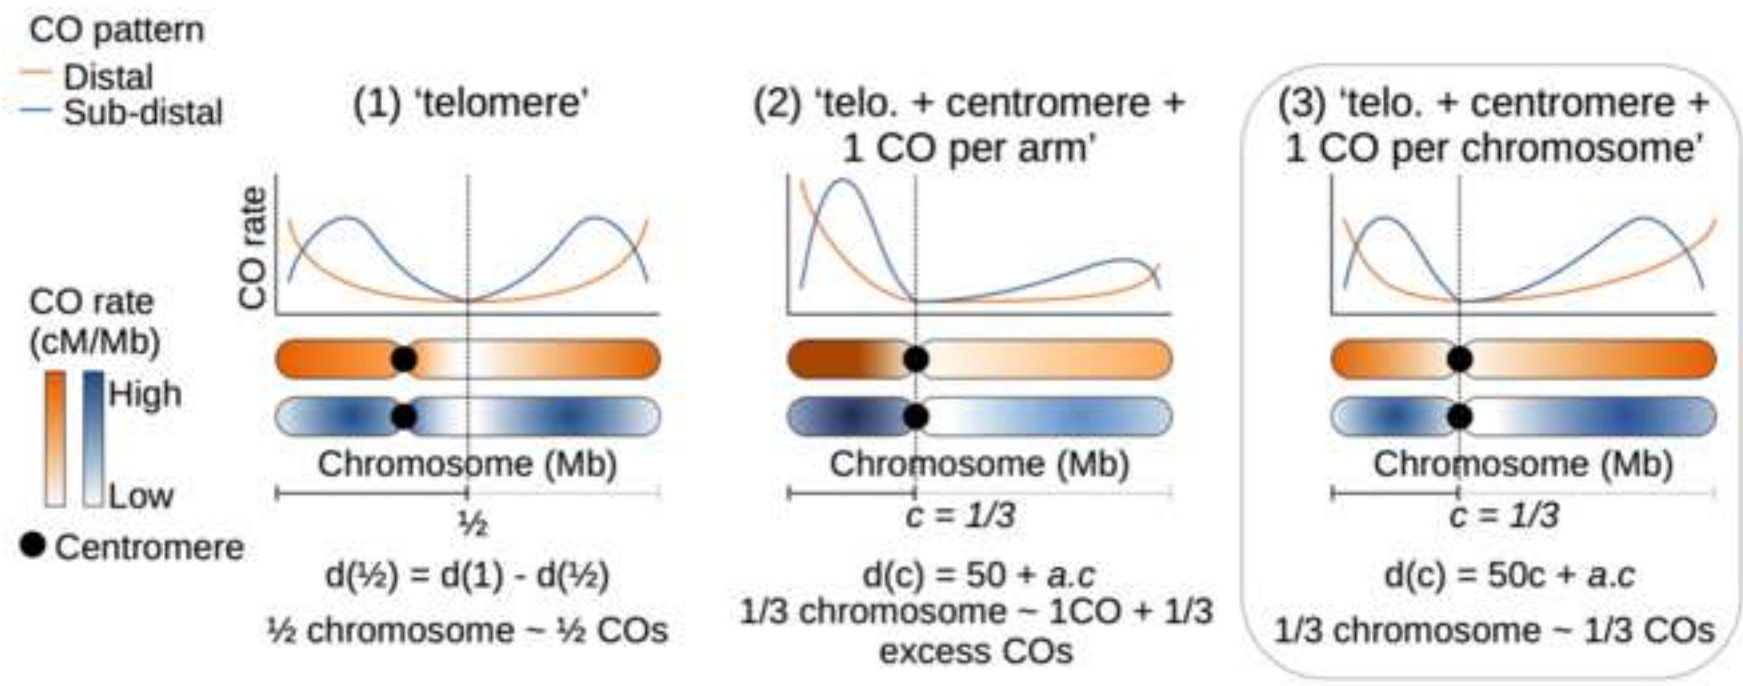



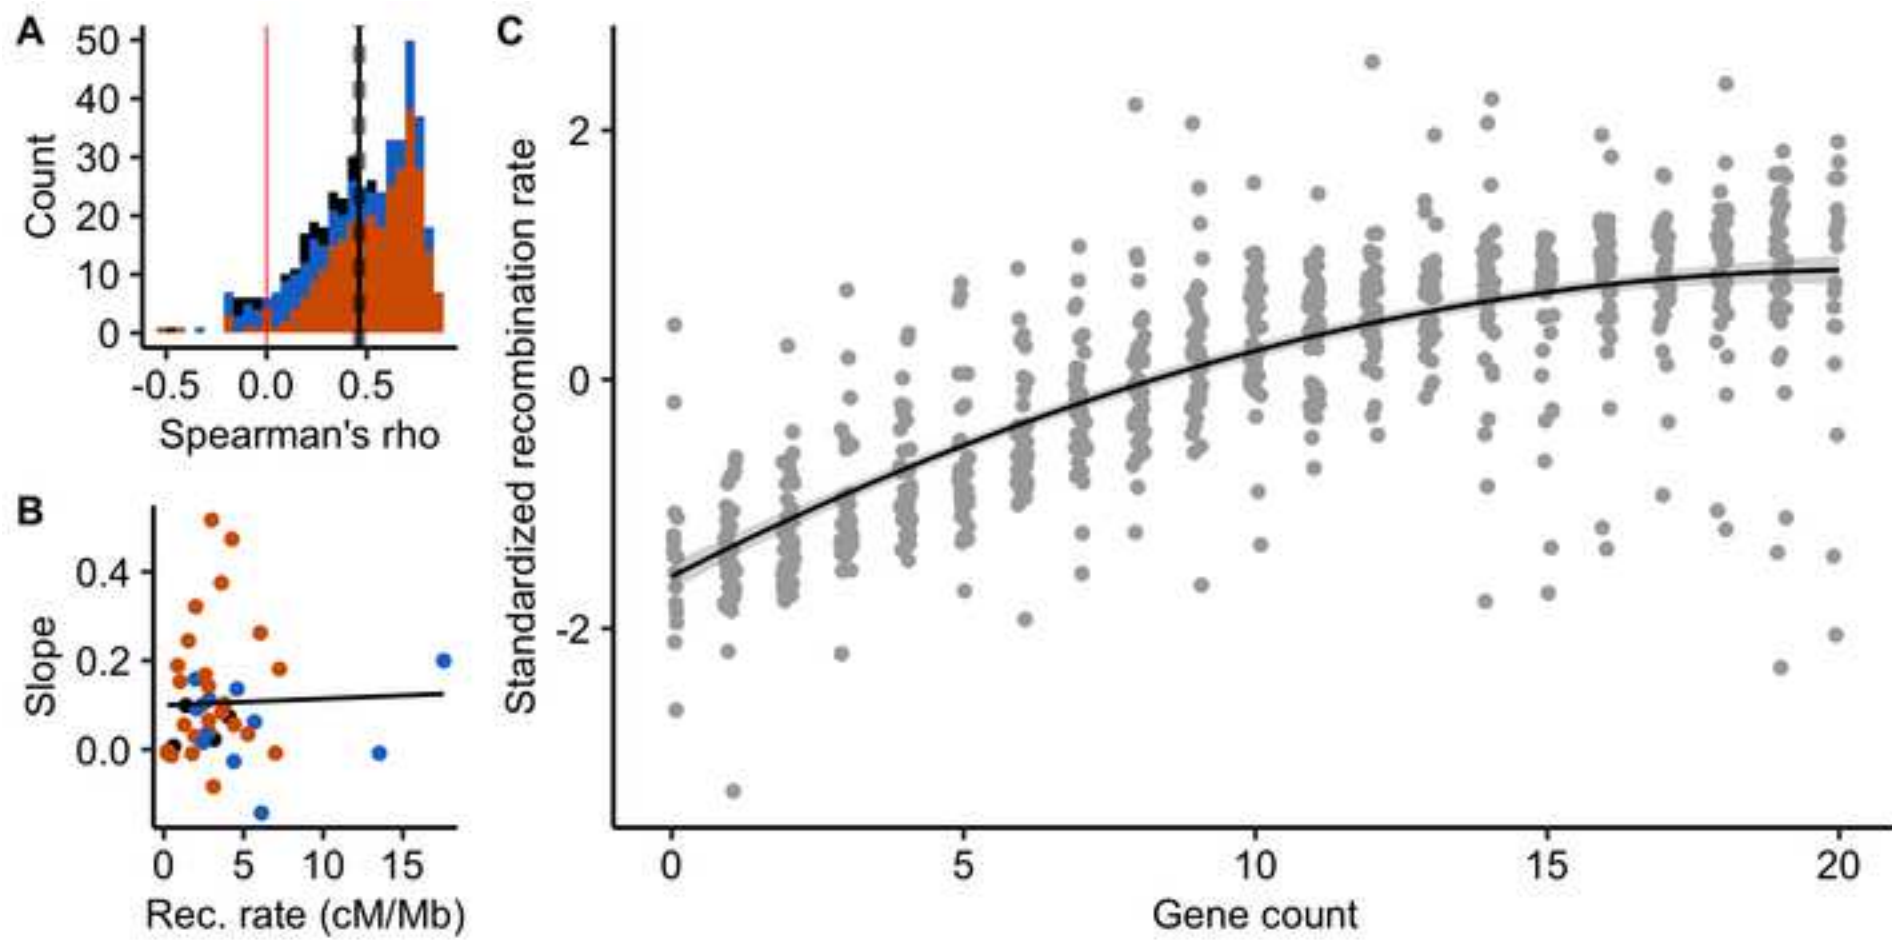

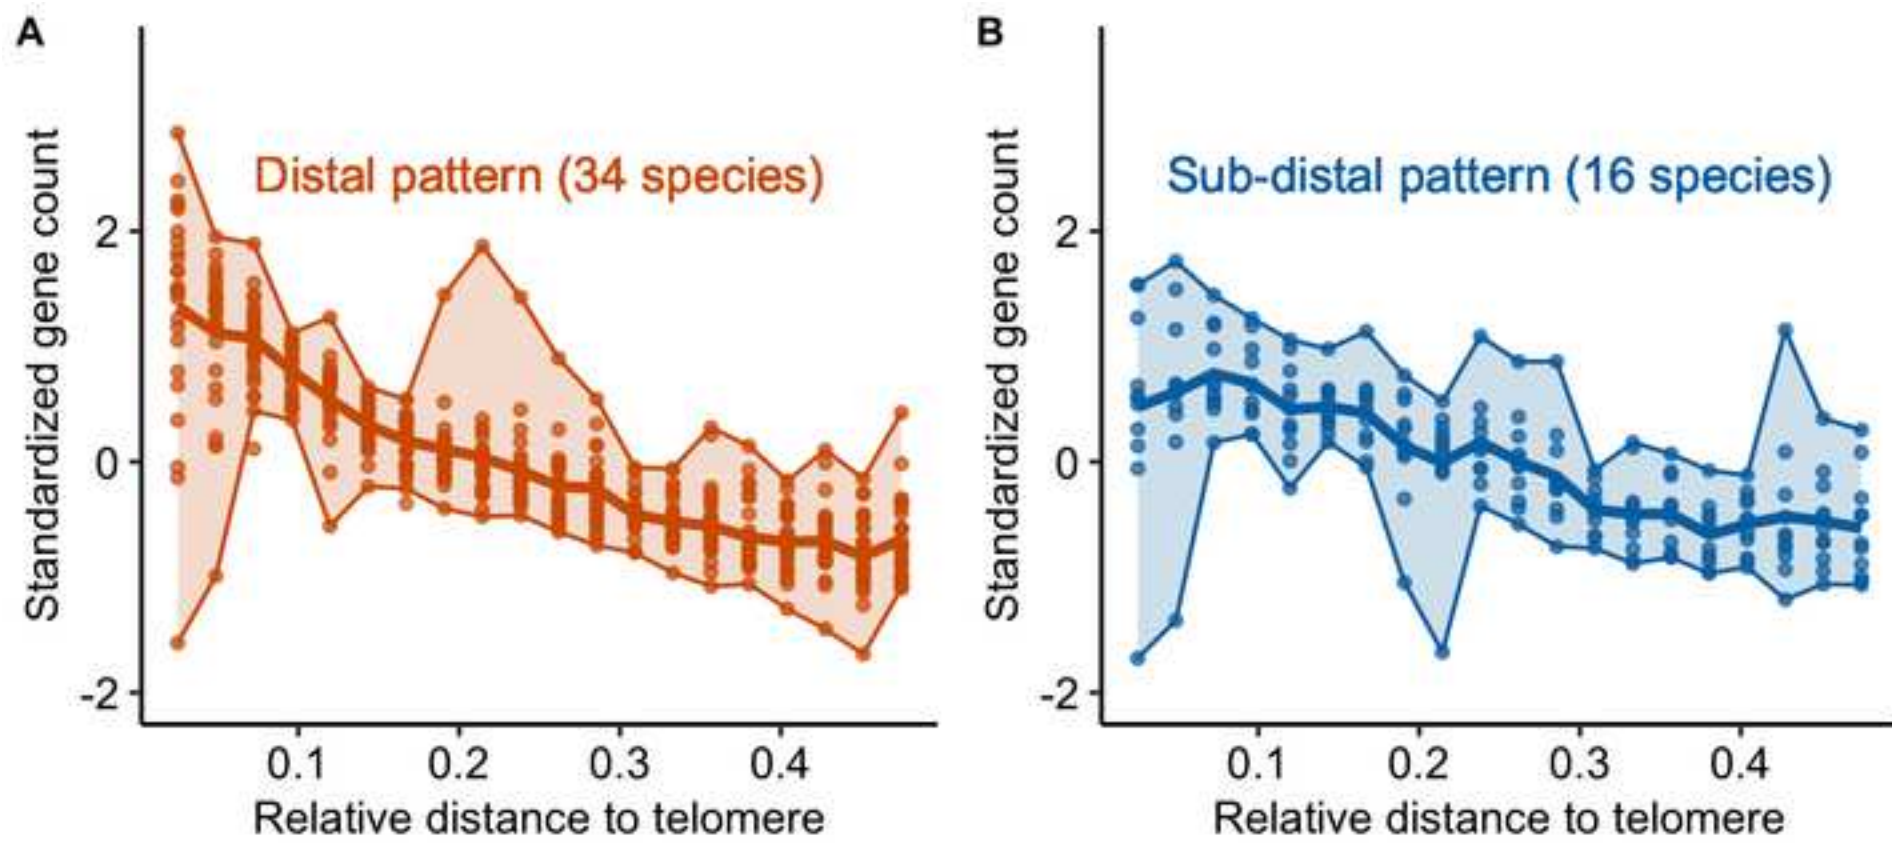

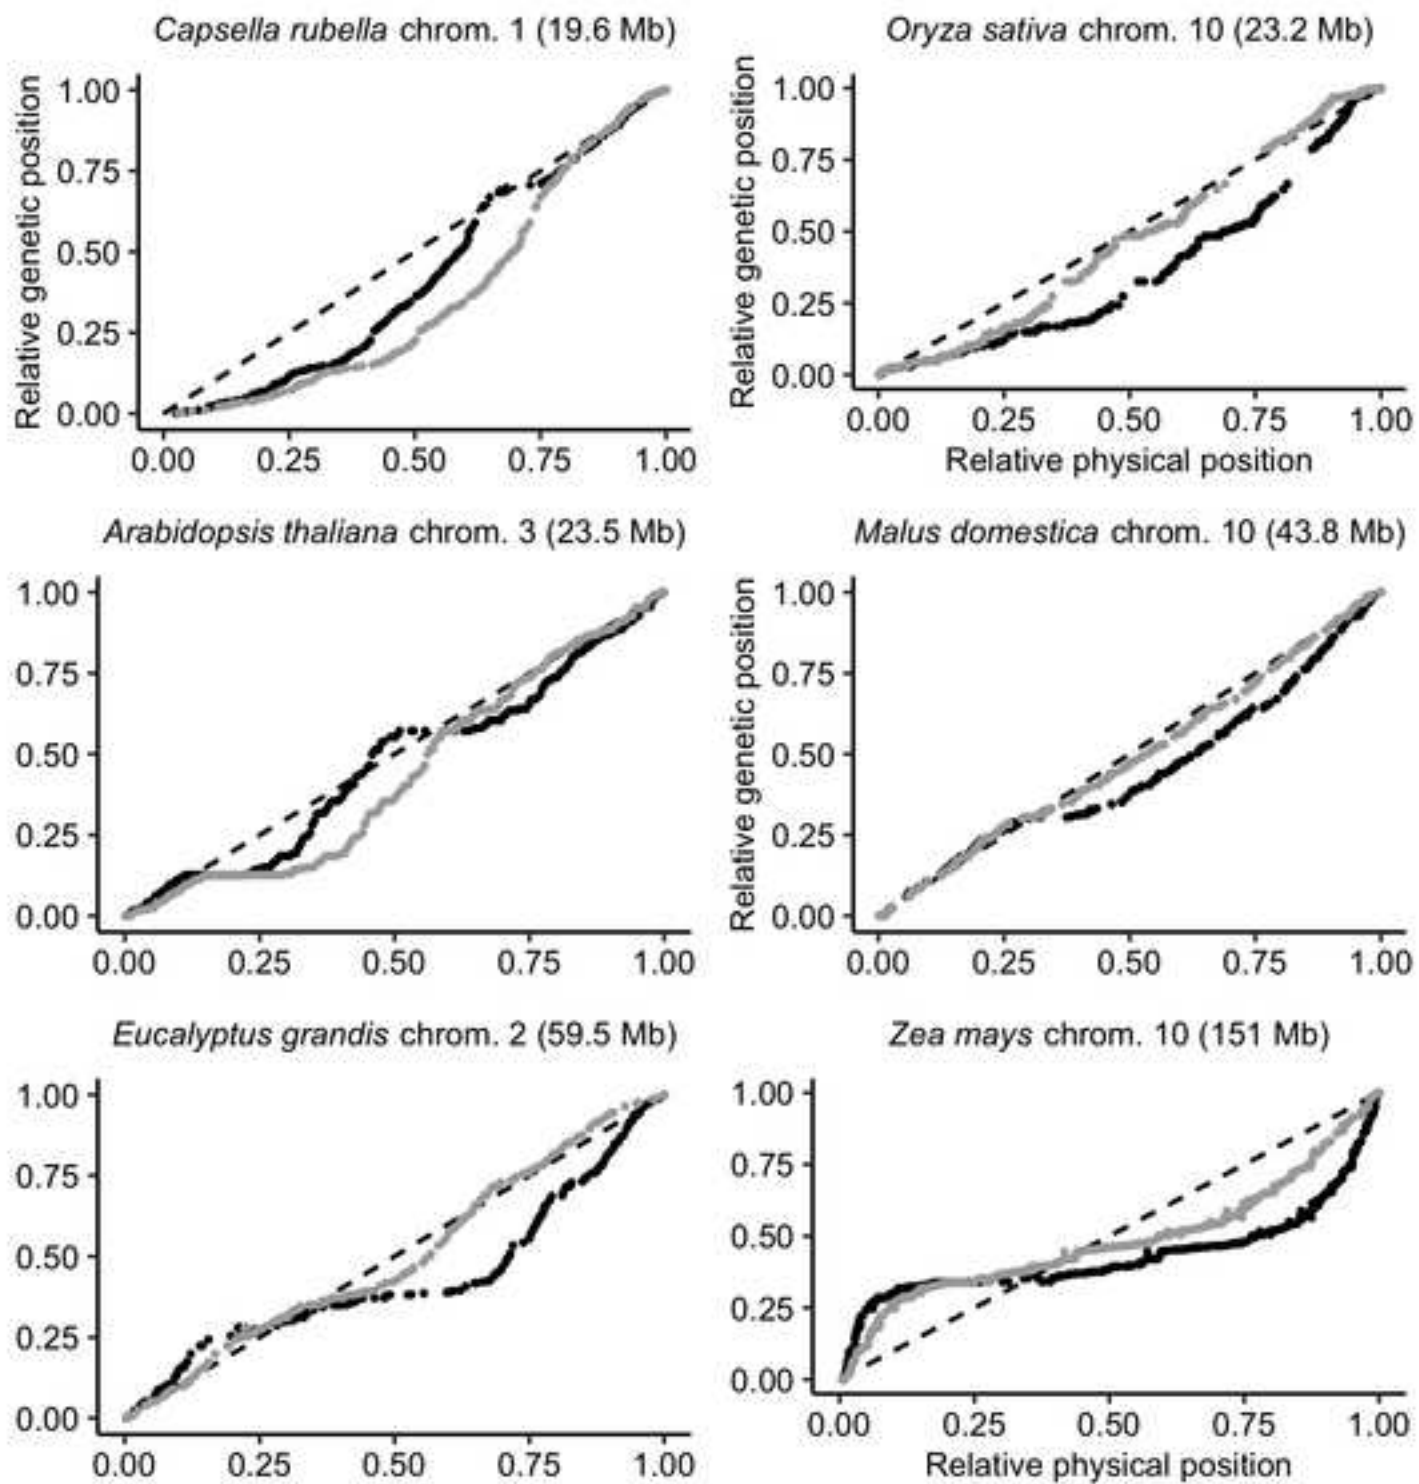

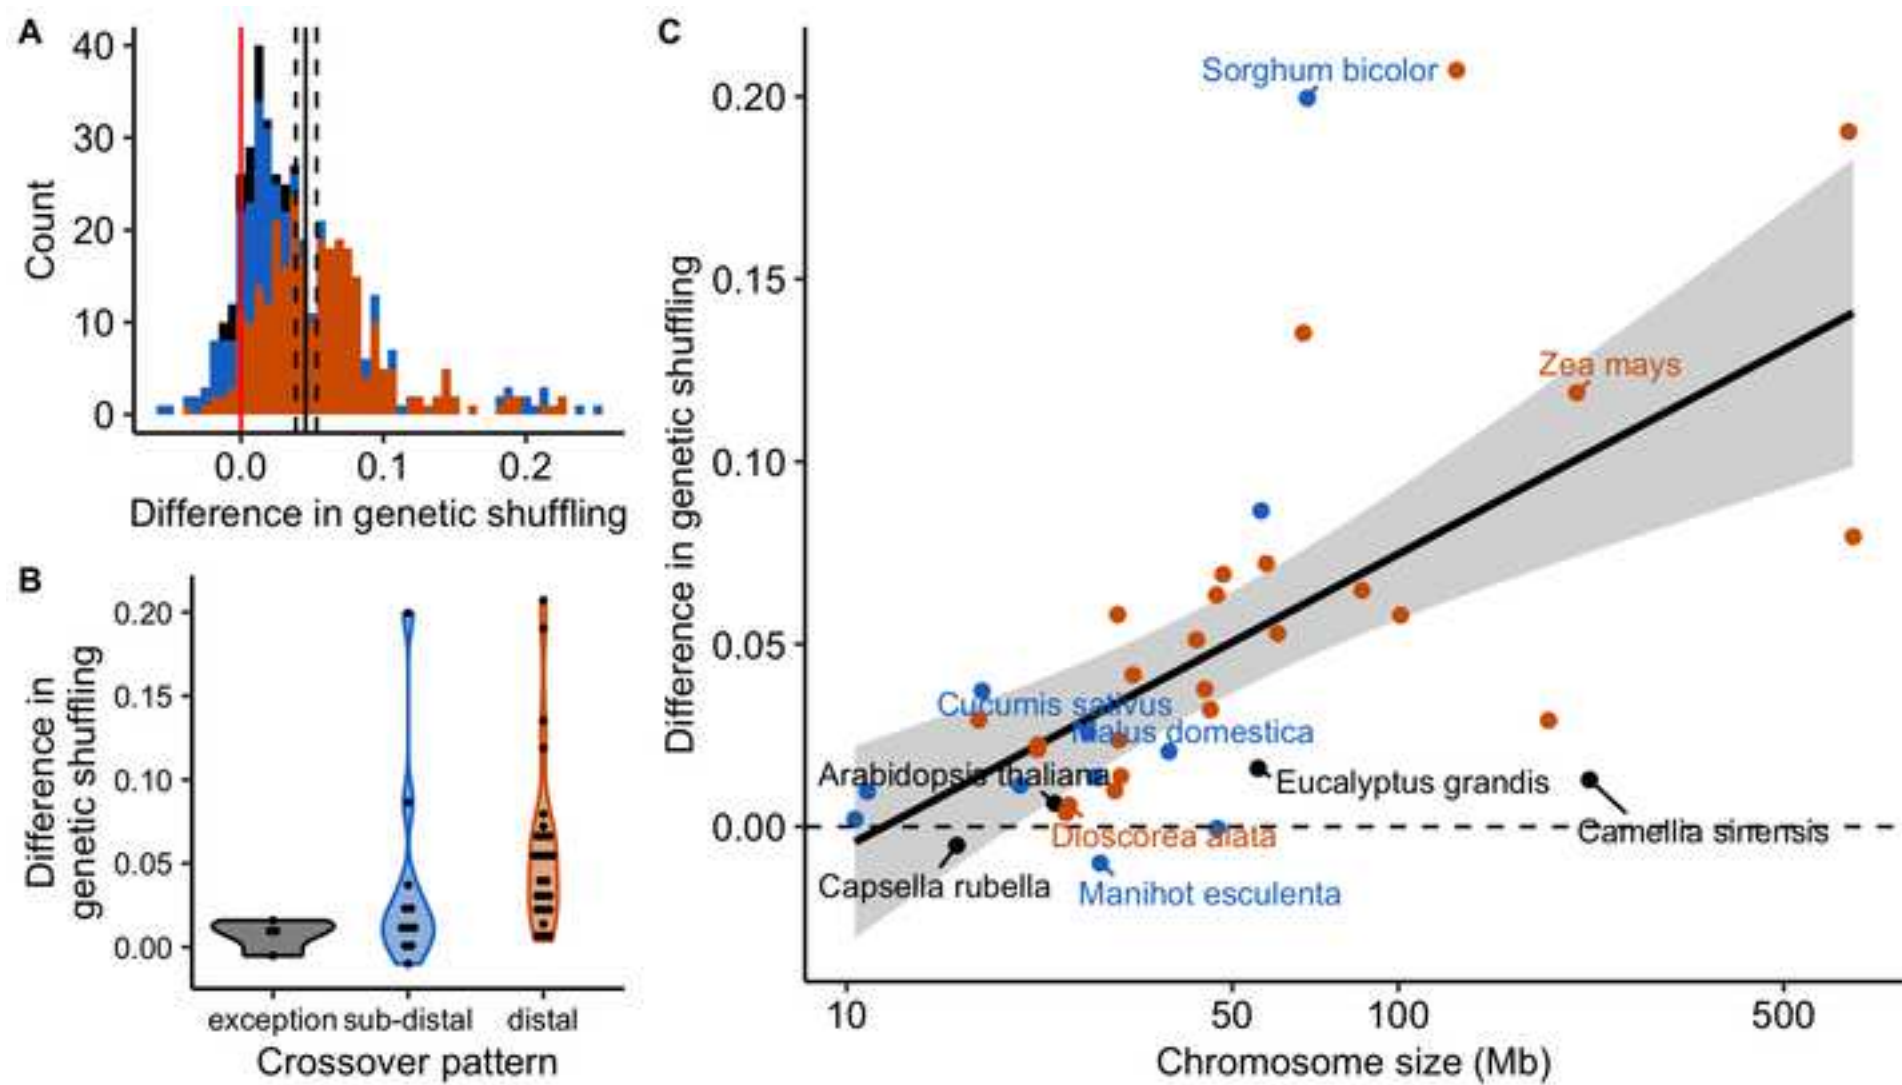



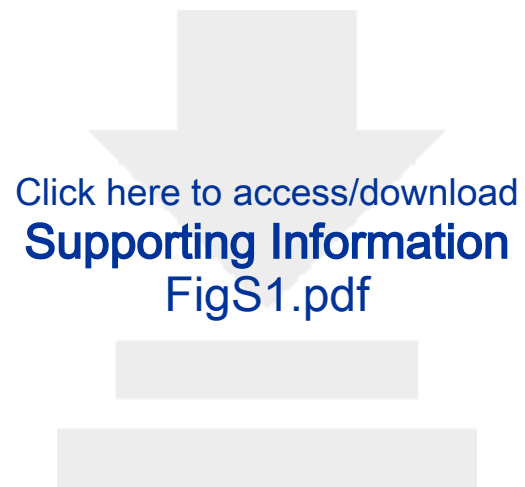

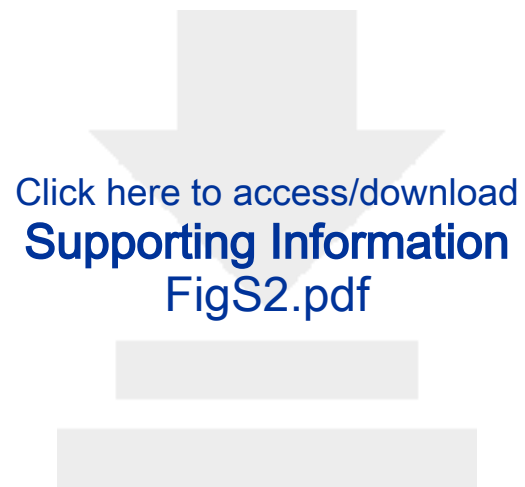

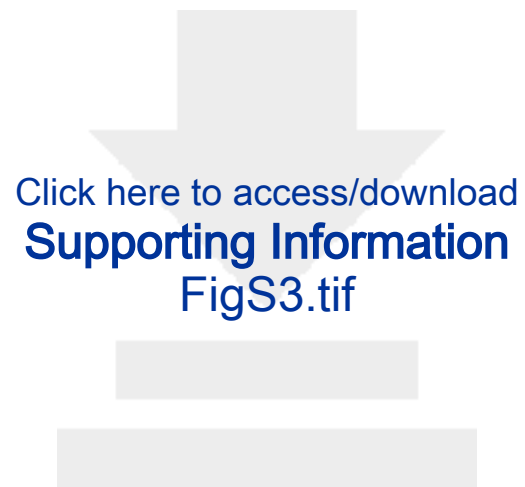

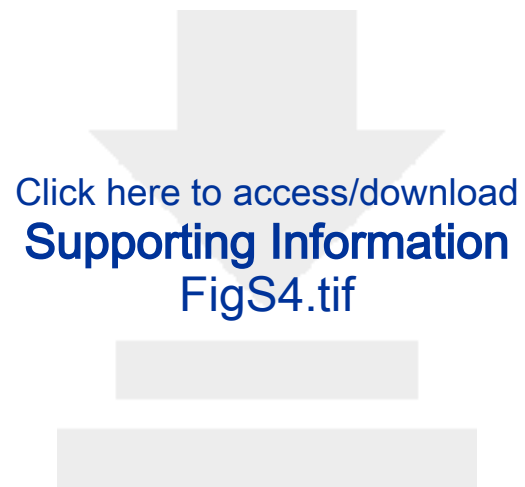

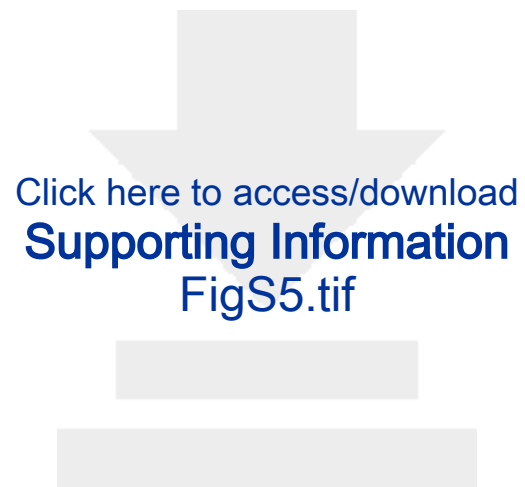

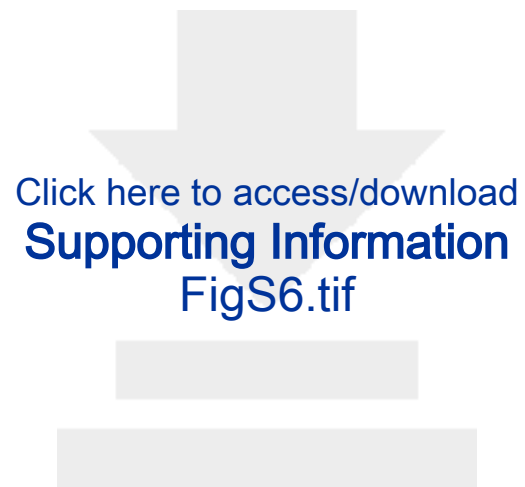

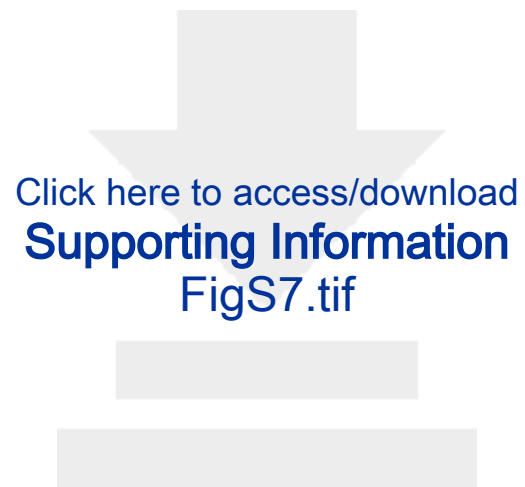

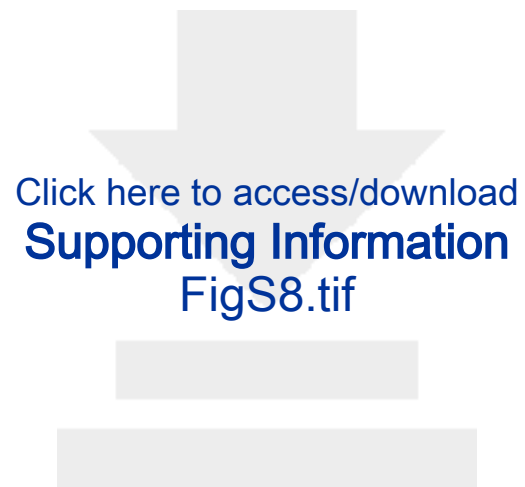



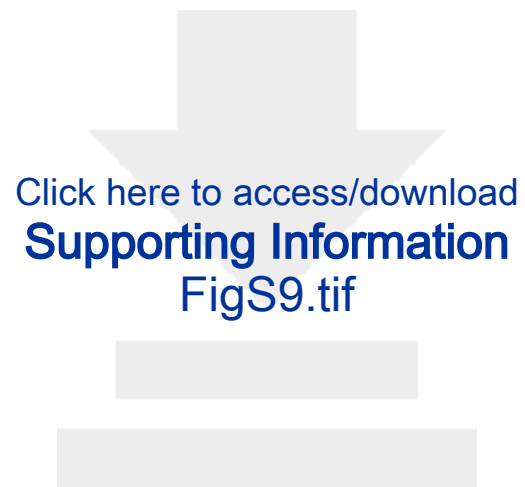

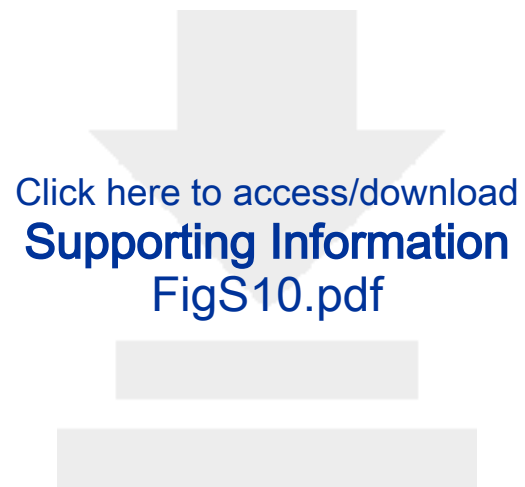

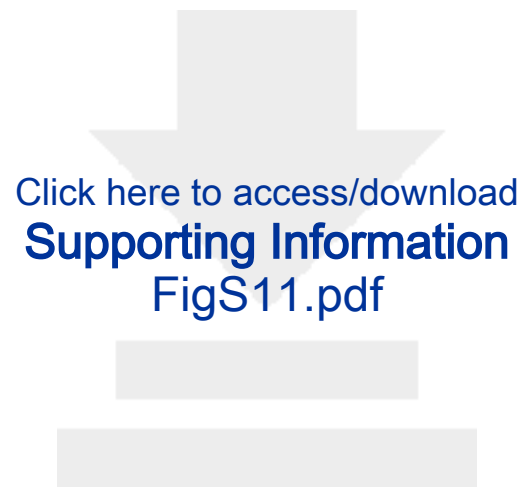

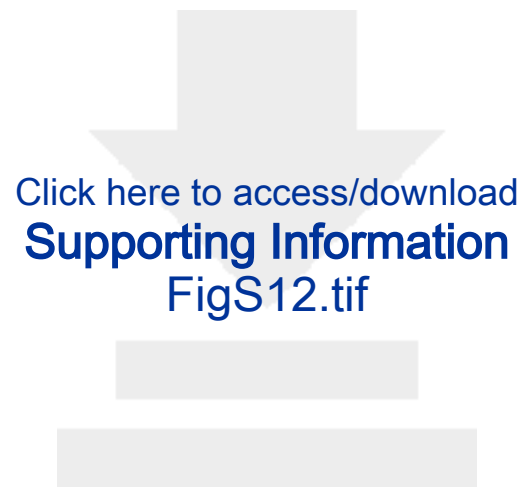

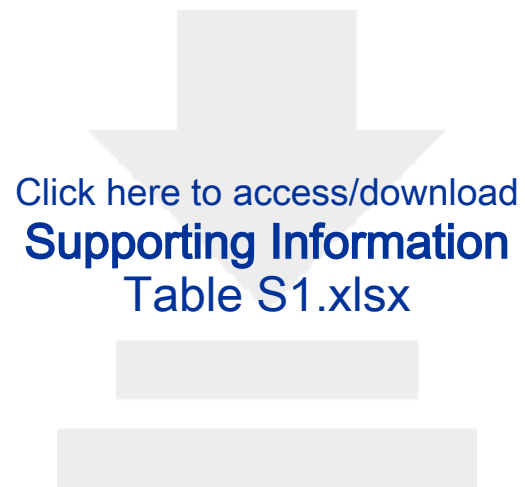

Click here to access/download  
**Supporting Information**  
Table S1.xlsx

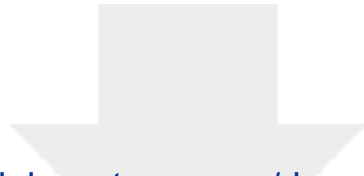

Click here to access/download  
**Supporting Information**  
Table S2.xlsx

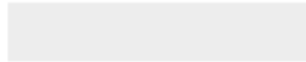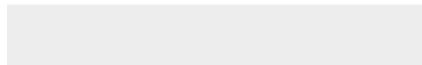



Click here to access/download  
**Supporting Information**  
Table S3.xlsx

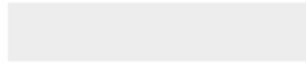

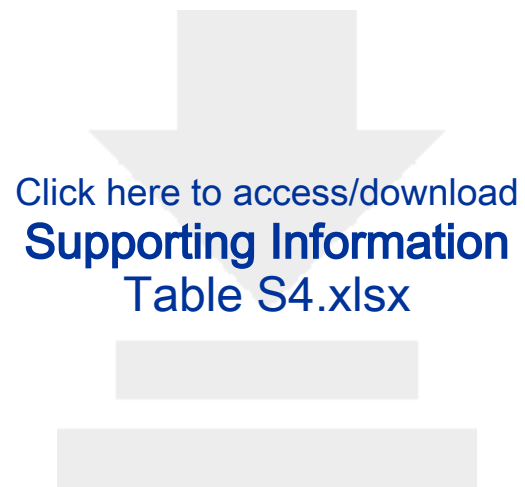





Click here to access/download  
**Supporting Information**  
Table S5.xlsx

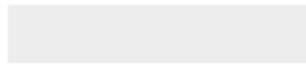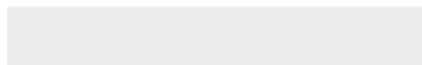

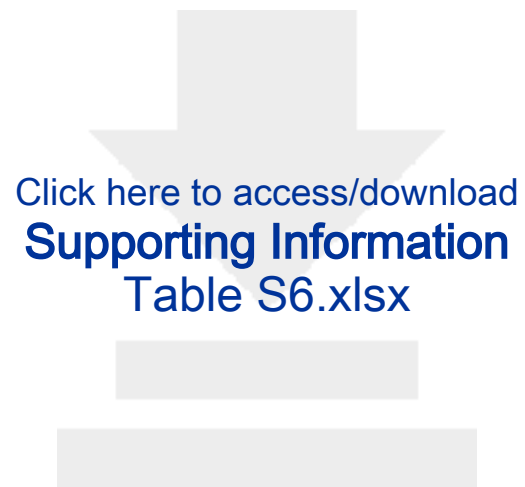

Click here to access/download  
**Supporting Information**  
Table S6.xlsx

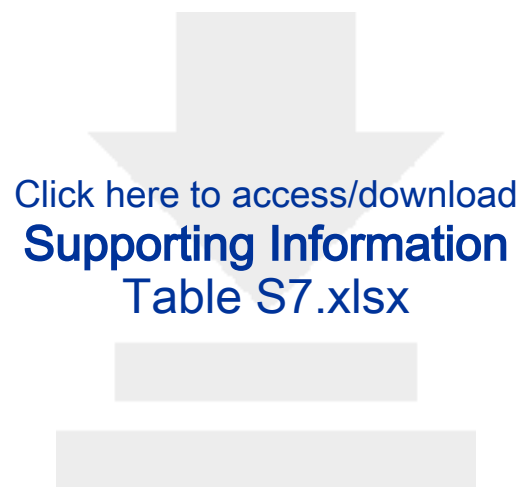

Click here to access/download  
**Supporting Information**  
Table S7.xlsx



Click here to access/download  
**Supporting Information**  
Table S8.xlsx



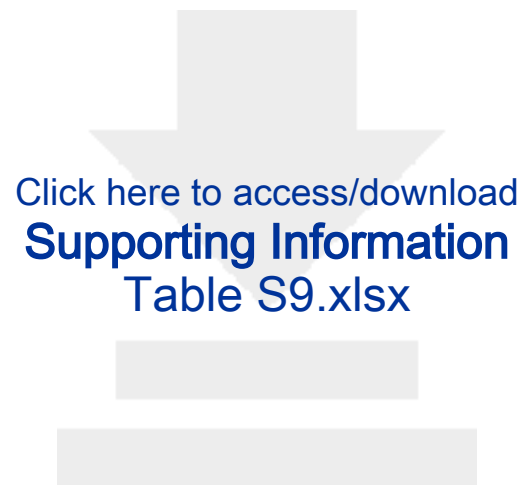



Click here to access/download  
**Supporting Information**  
Table S10.xlsx

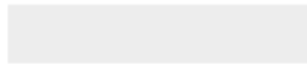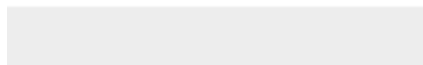

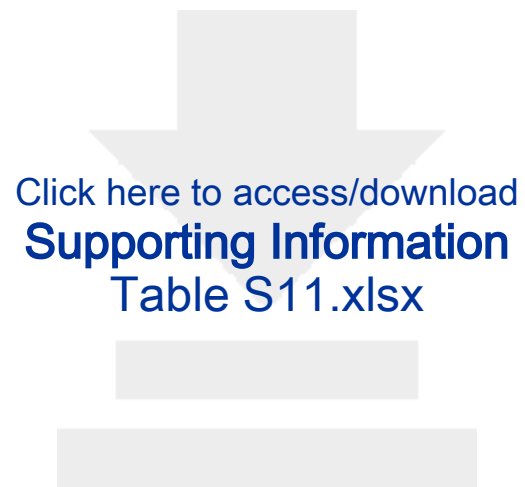

Click here to access/download  
**Supporting Information**  
Table S11.xlsx

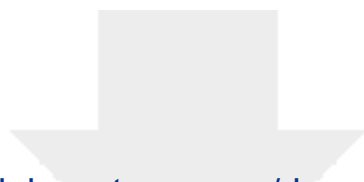

Click here to access/download  
**Supporting Information**  
Data S1.pdf

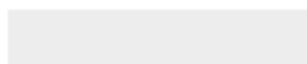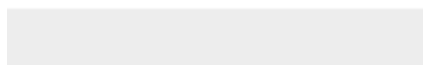



1 Diversity and determinants of recombination landscapes in  
2 flowering plants

3

4 Short title: Recombination landscapes in angiosperms

5 Authors: Thomas Brazier<sup>1</sup>, Sylvain Glémin<sup>1, 2\*</sup>

6

7 <sup>1</sup> University of Rennes, CNRS, ECOBIO (Ecosystems, Biodiversity, Evolution) - UMR  
8 6553, Rennes, France

9 <sup>2</sup> Department of Ecology and Genetics, Evolutionary Biology Center and Science for  
10 Life Laboratory, Uppsala University, Uppsala, Sweden

11

12 \* Corresponding author.

13 Present address: Sylvain Glémin, University of Rennes, CNRS, ECOBIO  
14 (Ecosystems, Biodiversity, Evolution) - UMR 6553, Rennes, France; email:  
15 sylvain.glemin@univ-rennes1.fr

16

17 ORCIDs:

18 Brazier: <https://orcid.org/0000-0001-5990-7545>

19 Glémin: <https://orcid.org/0000-0001-7260-4573>

20

21

Formatted: English (United States)

Formatted: Normal (Web)

Formatted: English (United States)

Formatted: Normal (Web)

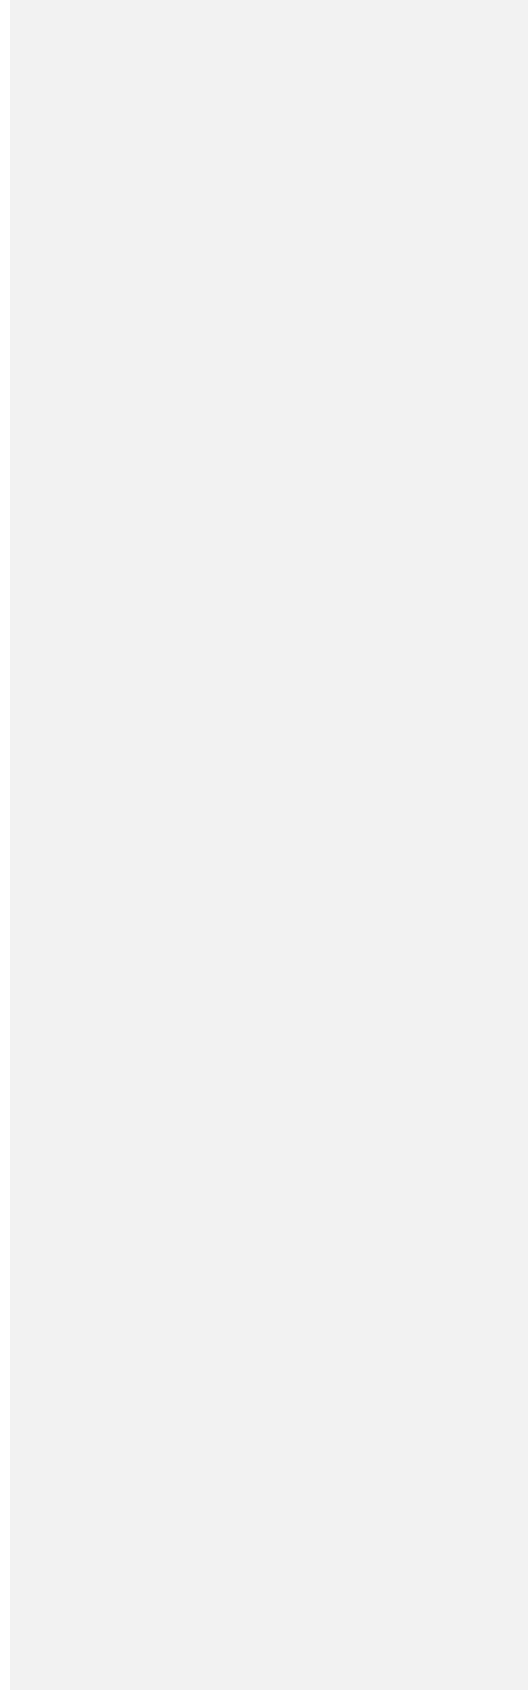

## 23 Abstract

24 During meiosis, crossover rates are not randomly distributed along the chromosome and  
25 ~~therefore they locally influence the creation of novel genotypes and the efficacy of~~  
26 ~~selection~~ their location may have a ~~strong~~ impact on the functioning and evolution of the  
27 genome. To date, the broad diversity of recombination landscapes among plants has rarely  
28 been investigated ~~and, undermining the overall understanding of the constraints driving the~~  
29 ~~evolution of crossover frequency and distribution. A formal comparative genomic approach is~~  
30 ~~still needed to characterized and assess~~ could be valuable to assess ~~the determinants that~~  
31 ~~shape the local crossover rate and the diversity of the resulting of recombination~~ landscapes  
32 among species and chromosomes ~~still need to be assessed in a formal comparative~~  
33 genomic approach. We gathered genetic maps and genomes for 57 flowering plant species,  
34 corresponding to 665 chromosomes, for which we estimated large-scale recombination  
35 landscapes. We found that the number of crossing-over per chromosome spans a limited  
36 range (between one to five/six) whatever the genome size, and that there is no single  
37 relationship across species between genetic map length and Chromosome-chromosome  
38 size. Instead, we found a general relationship between the relative size of chromosomes and  
39 recombination rate, while the absolute length drives-constrains the basal recombination rate  
40 for each species, ~~but though within species we were intrigued to notice that the~~  
41 ~~chromosome-wide recombination rate is was~~ proportional to the relative size of the  
42 chromosome. Moreover, for larger chromosomes, crossovers tend to accumulate occur at  
43 the ends of the chromosome leaving the central regions as recombination-free regions. At the  
44 chromosome level, we identified two main patterns (with a few exceptions) and Based on  
45 ~~identified crossover patterns and testable predictions,~~ we proposed a conceptual model  
46 explaining the broad-scale distribution of crossovers where both telomeres and centromeres  
47 are important play a role. Finally, we qualitatively identified two recurrent crossover patterns  
48 among species and highlighted that ~~these~~ patterns globally correspond to the underlying  
49 gene distribution, which affects how efficiently genes are shuffled at meiosis. In addition to

50 ~~the positive correlation between recombination and gene density, we argue that crossover~~  
51 ~~patterns are essential for the efficiency of chromosomal genetic shuffling, even though the~~  
52 ~~ultimate evolutionary potential forged by the diversity of recombination landscapes remains~~  
53 ~~an open question.~~ These results raised new questions not only on the evolution of  
54 recombination rates but also on their distribution along chromosomes.

55

56 KEYWORDS: meiotic recombination, crossover pattern, Marey map, genetic shuffling,  
57 comparative genomics

58

59 Author summary

60 Meiotic recombination is a universal feature of sexually reproducing species. During  
61 meiosis, crossing-overs play a fundamental role for the proper segregation of chromosomes  
62 during meiosis and for reshuffling alleles among between chromosomes, which increases  
63 genetic diversity and the adaptive potential of a species. How much variation in  
64 recombination is expected within a genome and among different species remains a central  
65 question to understand the evolution of recombination. We characterized and compared  
66 recombination landscapes in a large set of plant species that represent a wide range of  
67 genomic characteristics. We found that the number of crossing-overs varied little among  
68 species, from one mandatory to no more than five or six crossing-overs per chromosomes,  
69 whatever the genome size. However, recombination can strongly vary within a genome and  
70 we identified two main patterns of variation along chromosomes (with a few exceptions) that  
71 can be explained by a new conceptual model where chromosome length, chromosome  
72 structure and gene density play a role. The strong association between gene density and  
73 recombination raised new questions not only on the evolution of recombination rates but also  
74 on their distribution along chromosomes.

75

Formatted: Indent: First line: 0", Line spacing: Double



## 77 Introduction

78 Meiotic rRecombination is a universal feature of sexually reproducing species. Through  
79 crossovers, that participates to the production of new haplotypes are passed on to offspring  
80 by the reciprocal exchange of DNA between maternal and paternal chromosomes during  
81 meiosis. However, recombination landscapes — the variation in recombination rate along  
82 the chromosome — are not homogeneous along the chromosome across the genome and  
83 vary among species (de Massy, 2013; Haenel et al., 2018; Mézard et al., 2015; Stapley et  
84 al., 2017). Meiotic recombination plays a fundamental functional role by forming chiasmata  
85 at specific pairing sites between homologous chromosomes to ensure the physical tension  
86 needed for the proper disjunction of homologs (de Massy, 2013; Mézard et al., 2015; Zickler  
87 and Kleckner, 2015). Recombination also plays an evolutionary role by breaking the linkage  
88 disequilibrium between neighbouring sites and creating new genetic combinations  
89 transmitted to the next generation (i.e. genetic shuffling). upon which making selection can  
90 act more efficiently (Barton, 1995; Charlesworth and Jensen, 2021; Otto, 2009). However,  
91 the number and location of crossovers (COs) along the chromosome are finely regulated  
92 through mechanisms of crossover assurance, interference and homeostasis (Otto and  
93 Payseur, 2019; Pazhayam et al., 2021). In most species, crossover assurance is necessary  
94 to achieve proper segregation and to avoid deleterious consequences of nondisjunction,  
95 though it is not very clear if it is at least at least one CO per chromosome or per arm that is  
96 mandatory to achieve proper segregation and to avoid deleterious consequences of  
97 nondisjunction. Additional COs are also usually regulated through interference, ensuring that  
98 they are not too numerous and not too close to each other (Pazhayam et al., 2021; Wang et  
99 al., 2015). In addition to regulation on a large scale (Cooper et al., 2016; Zekowski et al.,  
100 2019), recombination is also finely tuned on a small scale. Generally, crossovers are  
101 concentrated in very short genomic regions (typically a few kb), i.e. recombination hotspots.  
102 In plants studied so far, CO hotspots are usually have been found in gene regulatory  
103 sequences, and mostly in promoters (Choi et al., 2018; He et al., 2017; Marand et al., 2019).

104 In addition to meiosis functioning, variations in recombination rates have a strong impact  
105 on genome structure, functioning and evolution (Gaut et al., 2007; Haenel et al., 2018;  
106 Stapley et al., 2017; Tiley and Burleigh, 2015) ~~and it . For example, recombination~~  
107 ~~landscapes are thought to shape genetic diversity and the distribution of transposable~~  
108 ~~elements (TEs) along chromosomes, through the indirect effect of recombination in~~  
109 ~~modulating the extent of linked selection and the accumulation of TEs in regions of low~~  
110 ~~recombination (Corbett-Detig et al., 2015; Kent et al., 2017). Recombination can also shape~~  
111 ~~nucleotide landscapes through the effect of GC-biased gene conversion (Galtier et al., 2018;~~  
112 ~~Glémin et al., 2014). As a consequence, it has become a key challenge to integrate~~  
113 recombination rate variation in population genomics in the age of 'genomic landscapes'  
114 (Booker et al., 2020; Comeron, 2017). The characterization of recombination landscapes  
115 also has practical interests ~~since it is likely that as variation in meiotic genes could be used~~  
116 ~~to changes in CO patterns is to be experimentally manipulated CO patterns for an~~  
117 advantageous purpose, such as [redirecting recombination towards regions of interest for](#)  
118 [crop breeding creating specific genetic combinations or directly influencing genetic diversity](#)  
119 [and the adaptive potential of a species](#) (Kuo et al., 2021).

120 ~~In plants, contrary to other eukaryotes, recombination rates are supposed to be higher in~~  
121 ~~smaller genomes because the linkage map length is independent of genome size and the~~  
122 ~~number of chromosomes explain more variation than genome size (Stapley et al., 2017).~~  
123 ~~Several broad-scale determinants have recently been identified, such as chromosome length~~  
124 ~~(Tiley and Burleigh, 2015), distance to the telomere or centromere (Blitzblau et al., 2007)~~  
125 ~~and genomic and epigenetic features (Apuli et al., 2020; Marand et al., 2019; Yelina et al.,~~  
126 ~~2012).~~

127 ~~To date, the diversity of recombination landscapes in plants has not been properly~~  
128 ~~quantified; it is often limited to genome-wide recombination rates (Stapley et al., 2017), even~~  
129 ~~though it could be used as a lever to identify the major determinants shaping crossover~~  
130 ~~patterns across species (Gaut et al., 2007). Recently, a meta-analysis explored large-scale~~



131 ~~recombination landscapes among eukaryotes and concluded that chromosome length plays~~  
132 ~~a major role in crossover patterns, but this analysis only included a limited number of plant~~  
133 ~~species (Haenel et al., 2018). As plant genomes are highly diverse in many ways (Pellicer et~~  
134 ~~al., 2018; Soltis et al., 2015), the expected diversity in recombination landscapes has been~~  
135 ~~overlooked (Gaut et al., 2007). Plant genomes also contain large regions with suppressed~~  
136 ~~recombination in various proportions (from a few Mb to hundreds of Mb, 1 to 75 % of the~~  
137 ~~genome), which impact affect genomic averages (Gaut et al., 2007; Haenel et al., 2018),~~  
138 ~~and it seems that the physical location of COs along the chromosome is species-specific~~  
139 ~~(Wang and Copenhaver, 2018). However, despite these recent advances, the diversity of~~  
140 ~~recombination landscapes in plants still remain to be properly quantified. Nonetheless,~~  
141 ~~several broad-scale determinants have recently been identified, such as chromosome length~~  
142 ~~(Haenel et al., 2018; Tiley and Burleigh, 2015), distance to the telomere or centromere~~  
143 ~~(Blitzblau et al., 2007; Haenel et al., 2018) and genomic and epigenetic features (Apuli et al.,~~  
144 ~~2020; Marand et al., 2019; Yelina et al., 2012). In plants, contrary to other eukaryotes,~~  
145 ~~recombination rates are supposed to be higher in smaller genomes because the linkage map~~  
146 ~~length is independent of genome size and the number of chromosomes explain more~~  
147 ~~variation than genome size (Stapley et al., 2017).~~

148 Recently, a meta-analysis explored large-scale recombination landscapes among  
149 eukaryotes and paved the way for identifying general patterns (Haenel et al., 2018). They  
150 found that larger chromosomes have low crossover rates in their centre and suggested a  
151 simple telomere-led model with a universal bias of COs towards the periphery of the  
152 chromosome, positively driven by chromosome length. They also proposed that  
153 chromosome length played the main role in crossover patterning while position of the  
154 centromere had almost no effect (except a local one). Alternatively, it has also been  
155 proposed that both telomeres and centromeres shape recombination landscapes (Wang and  
156 Copenhaver, 2018) and the universality of a universal pattern among plants has been  
157 questioned (Zelkowski et al., 2019). So far, the number of studied species remained limited

158 ~~and, as plant genomes are highly diverse in many ways (Pellicer et al., 2018; Soltis et al.,~~  
159 ~~2015), the expected diversity in recombination landscapes may have been overlooked (Gaut~~  
160 ~~et al., 2007). In addition, previous studies where meta-analyses combining heterogeneous~~  
161 ~~datasets (ex: mix of inferred data from graphics, final processed data and only a few raw~~  
162 ~~datasets in Haenel et al. 2018) without a standard way to infer recombination maps, which~~  
163 ~~prevented detailed comparison among many species, and the existence of a major broad-~~  
164 ~~scale determinant of CO distribution and frequency, such as chromosome size, needs to be~~  
165 ~~tested. Haenel et al. (2018) found that larger chromosomes have low crossover rates in their~~  
166 ~~centre and suggested a simple telomere-led model with a universal bias of COs towards the~~  
167 ~~periphery of the chromosome, positively driven by chromosome length; this new conceptual~~  
168 ~~model still needs to be tested on data. However, there is little evidence supporting a~~  
169 ~~universal pattern among plants (Zelkowski et al., 2019); and it has been proposed that both~~  
170 ~~telomeres and centromeres shape recombination landscapes, although this is not yet fully~~  
171 ~~understood (Wang and Copenhaver, 2018).~~

172 ~~To overcome these limitations, since recombination hotspots are supposedly found in~~  
173 ~~gene regulatory sequences, gene density could also be a universal driver of recombination~~  
174 ~~rates among plant species, leading to the emergence of crossover patterns but this still~~  
175 ~~needs to be tested.~~

176 ~~By combining genetic mapping from pedigree data and genome assembly up to the~~  
177 ~~chromosome scale, we have gathered, to the best of our knowledge, the largest~~  
178 ~~recombination landscape dataset in flowering plants. We started from raw data by combining~~  
179 ~~genetic mapping from pedigree data and genome assembly up to the chromosome scale,~~  
180 ~~from which we estimated recombination maps – more precisely the sex-averaged rate of~~  
181 ~~COs along chromosomes – using the same standardized method. More precisely, we have~~  
182 ~~estimated the sex-averaged rate of COs along chromosomes. Thanks to this dataset we~~  
183 ~~addressed the following questions. What is the range of COs per chromosome observed in~~  
184 ~~plants? Is the distribution of COs shaped by genome structure (i.e. chromosome size,~~

185 ~~telomeres, centromeres) and if so is there a universal pattern? Since recombination hotspots~~  
186 ~~have been found in gene regulatory sequences so far, are recombination landscapes~~  
187 ~~generally associated with gene density? What are the consequences of recombination~~  
188 ~~heterogeneity on the extent of genetic shuffling? Overall, we found that recombination~~  
189 ~~landscapes in plants are more diverse and more complex than initially thought. We tested~~  
190 ~~the relationship between recombination and chromosome length and assessed if the~~  
191 ~~distribution of COs could be shaped by genome structure (i.e. chromosome size, telomeres,~~  
192 ~~centromeres) or genome features (i.e. gene density).~~ We identified two main patterns of  
193 recombination that are parallel to, and which may emerge from, the gene density distribution.  
194 We showed. Finally, we discussed the possible evolutionary implications of the  
195 heterogeneity of recombination landscapes by quantifying how CO patterns affect the extent  
196 of genetic shuffling. We assessed that COs patterns were improving that this globally  
197 improves the genetic shuffling of coding regions, which raises new questions ~~on~~ about the  
198 evolution of recombination.

Formatted: English (United States)

## 201 Results

### 202 Dataset and recombination maps

203 We retrieved publicly available data for [sex-averaged](#) linkage maps and genome  
204 assemblies, ~~to obtain genetic map distances and physical distances~~. We selected linkage  
205 maps for which the markers had genomic positions on a chromosome-level genome  
206 assembly (except for *Capsella rubella*, which had a high-quality scaffold-level assembly, ~~i.e.~~  
207 ~~of~~ pseudo-chromosomes). [We remapped markers on the reference genome for 14 species](#)  
208 [for which genomic positions were not known or were mapped to an older assembly](#). After  
209 making a selection based on the number of markers, marker density, and genome coverage,

210 and after filtering out the outlying markers ([see methods](#)), ~~we adopted a qualitative visual~~  
211 ~~validation. Recombination landscapes with large confidence intervals were discarded. In the~~  
212 ~~end, we retained~~ produced 665 chromosome-scale Marey maps (plot of the genetic vs  
213 genomic distance, cM vs Mb) for 57 species (2-26 chromosomes per species), ~~from which~~  
214 ~~we successfully inferred recombination landscapes~~ (Table S1, S2, [Figures S1, S2](#)). ~~After~~  
215 ~~removing the outliers,~~ ~~t~~he number of markers per chromosome ~~map~~ ranged from 31 to  
216 49,483, with a mean of 956 markers. [Corrected linkage map length \(Hall & Willis's method\)](#)  
217 [did not change the total linkage map length \(mean difference = 1.19 cM, max difference =](#)  
218 [5.62 cM\), giving confidence in the coverage of the linkage map \(Hall & Willis, 2005\) per map.](#)  
219 We ~~used a linear regression on the models' residuals to verify~~ verified that neither the  
220 number of markers, marker density nor the number of progenies had a significant effect on  
221 the analyses. We also retrieved gene annotations for 41 genomes. The angiosperm  
222 phylogeny was well represented in our sampling ([FigureFig S3](#)), with a basal angiosperm  
223 species (*Nelumbo nucifera*), 15 monocot species and 41 eudicots. [From literature, w](#)~~w~~e also  
224 ~~searched~~ ~~obtained the literature for~~ data on the centromeric index for 37 species, defined as  
225 the ratio of the short arm length divided by the total chromosome length (Table S3).

226 From the Marey maps, we estimated local recombination rates along the chromosomes  
227 on non-overlapping 100 kb windows [with a 95% confidence interval \(1,000 bootstraps\)](#).  
228 Estimates at a scale of 1 Mb yielded very similar results ([the Spearman rank correlation](#)  
229 [coefficient correlation between the values for 1 Mb windows and those for the 100 kb](#)  
230 ~~windows within them~~ ~~two estimates was~~ [correlation between 1 Mb windows and 100 kb](#)  
231 [windows pooled in 1 Mb windows, Spearman rank correlation coefficient](#)  $\rho = 0.99$ ,  $p <$   
232  $0.001$ , Table S4) therefore only 100 kb landscapes were analysed in the subsequent  
233 analyses.

234 Smaller chromosomes ~~recombine~~ [have higher recombination](#)  
235 [rates](#) ~~more often~~ than larger ones

Formatted: Font: 11 pt, Font color: Auto, English (United Kingdom)

Formatted: Font: 11 pt, Font color: Auto, English (United Kingdom)

Formatted: Font: 11 pt, Font color: Auto, English (United Kingdom)

236 ~~Our results are in~~ agreement with previous studies ~~showing that smaller chromosomes~~  
237 ~~have a higher recombination rate per Mb than larger ones~~ (Haenel et al., 2018; Stapley et  
238 al., 2017), ~~and our sampling suggests a consistent pattern across species (Figure 1A). We~~  
239 found a significant negative correlation between chromosome size (Mb) and the mean  
240 chromosomal recombination rate (Spearman rank correlation coefficient  $Rho = -0.84$ ,  $p <$   
241  $0.001$ ; log-log Linear Model, adjusted  $R^2 = 0.83$ ,  $p < 0.001$ ). For most species, there were  
242 between one and four COs per chromosome, ~~which suggests that the number of COs per~~  
243 ~~chromosome remains stable across species~~ even though the genome sizes span almost two  
244 orders of magnitude. Less than 2% of chromosomes had less than one CO (n = 11), 234  
245 chromosomes had between one and two COs, suggesting that a single CO per chromosome  
246 is sufficient, though 419 chromosomes had more than two COs.

Formatted: Font: 11 pt, English (United Kingdom)

247 Using a Linear Mixed Model (~~LMER~~) we found a significant species random effect ~~for both~~  
248 ~~the intercept and the slopes~~ (the best model was log-log LMER  $\log_{10}(\text{recombination rate}) \sim$   
249  $\log_{10}(\text{chromosome size}) + (1 | \text{species})$ , marginal  $R^2 = 0.17$ , conditional  $R^2 = 0.96$ ,  $p <$   
250  $0.001$ ); ~~the introduction of Adding~~ phylogenetic covariance did not improve the mixed model  
251 thus we did not retain a phylogenetic effect (Table S5). Interestingly, ~~the LMER results~~  
252 ~~showed that~~ the (log-log) relationship between the recombination rate and the chromosome  
253 size was not the same within and between species, suggesting that absolute chromosome  
254 size does not have a general effect among species (~~Figure~~Fig 1B). Similarly, the relationship  
255 between linkage map length (cM) and chromosome size (Mb) was highly species specific  
256 (linkage map length  $\sim \log_{10}(\text{chromosome size}) + (1 | \text{species})$ ~~log-log linear mixed model~~,  
257 marginal  $R^2 = 0.49$ , conditional  $R^2 = 0.99$ ,  $p < 0.001$ ) (~~Figure~~Fig 2A), with species slopes  
258 decreasing with the mean chromosome size in a log-log relationship. It, ~~indicat~~es~~ing~~ that  
259 species slopes are roughly proportional to the inverse of the mean chromosome size  
260 (~~Figure~~Fig S42C). As a consequence, the excess of COs on a chromosome (i.e. the linkage  
261 map length minus 50 cM) was not ~~correlated to~~ correlated with the absolute chromosome  
262 size but ~~to~~ with the relative one (i.e. chromosome size divided by the mean chromosome

Formatted: Subscript

Formatted: Subscript

Formatted: Superscript

Formatted: Superscript

263 size of the species; Fig 2B). Moreover, in contrast to the relationship between recombination  
 264 rate and absolute size, we did not observe any difference between the linear model and the  
 265 fixed regression of the mixed linear model, suggesting that this relationship is similar across  
 266 species (Figure Fig 2B). More concretely, it means that two chromosomes having the same  
 267 ratio of size will have the same ratio of excess of recombination rate, whatever the species  
 268 and the genome size.

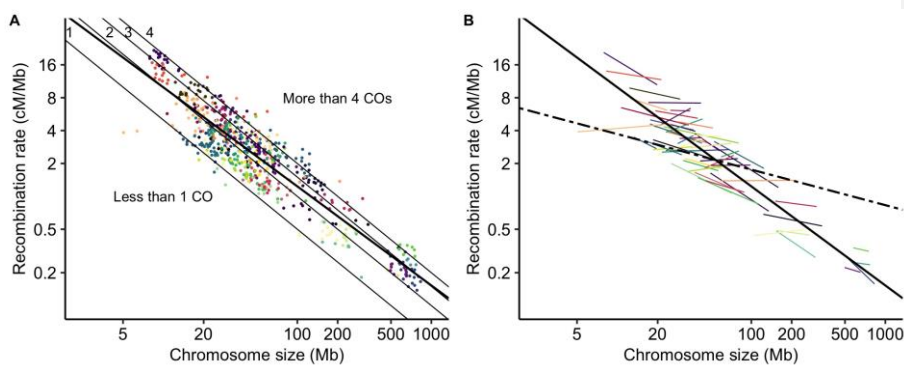

269

270 **Figure Fig 1.** Mean Recombination-recombination rates per chromosome (cM/Mb, log scale) are  
 271 negatively correlated to-with chromosome genomic size (Mb, log scale). Recombination rates  
 272 were estimated with the loess regression function in windows of 100 kb and averaged per  
 273 chromosome. Each point represents a chromosome (n = 665). Species are presented in  
 274 different colours (57 species). (A) The large black bold solid line represents the Linear Model  
 275 regression line fitted to the data. (LM  $\log_{10}(\text{recombination rate}) \sim \log_{10}(\text{chromosome size})$  log-  
 276 log Linear Model, adjusted  $R^2 = 0.83$ ,  $p < 0.001$ ). The lower thin solid long dashed line  
 277 corresponds to the expectation of one CO, two, three or four COs per chromosome  
 278 respectively, and the upper dashed lines correspond to two, three or four COs respectively  
 279 (ascending order). (B) Correlations between recombination rates and chromosome size within  
 280 each species with at least 5 chromosomes (coloured lines, 55 species) and the overall  
 281 between-species correlation controlled for a species effect (black dashed line, n = 57 species).  
 282 Solid bold line as in (A). The black dashed line represents the selected Linear Mixed Model with  
 283 a species effect (LMER  $\log_{10}(\text{recombination rate}) \sim \log_{10}(\text{chromosome size}) + (1 | \text{species})$  log-log LMER, marginal  $R^2 = 0.17$ , conditional  $R^2 = 0.96$ ,  $p < 0.001$ ). Coloured lines  
 284 show the random regressions for species (55 species regression lines for species with at least  
 285 5 chromosomes mapped, 5-26 chromosomes per species, 55 species).  
 286

287

Formatted: Normal

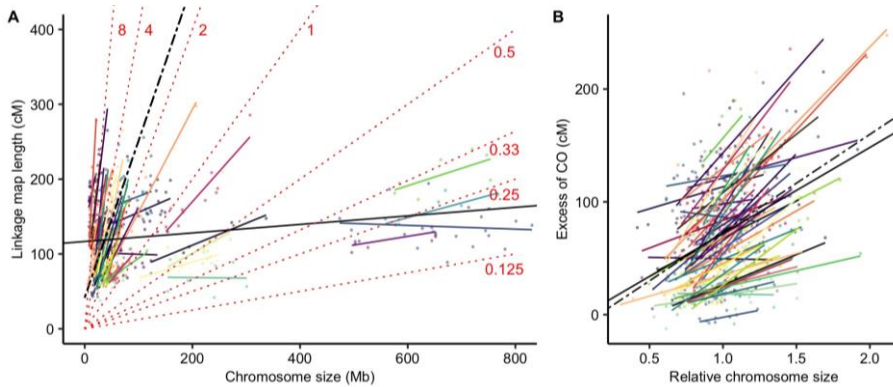

288

289 **Figure 2.** Linkage map length (cM) is positively correlated ~~to with~~ genomic chromosome size  
 290 (Mb). (A) Correlation between chromosome genomic size (Mb) and linkage map length (cM).  
 291 Each point represents a chromosome ( $n = 665$ ). Species are presented in different colours (57  
 292 species). ~~The black s~~~~The linear regression is the solid black line~~ ~~represents the simple linear~~  
 293 ~~regression~~ ~~(LM-linkage map length ~ log<sub>10</sub>(chromosome size))~~~~Linear Model~~, adjusted  $R^2 =$   
 294  $0.036$ ,  $p < 0.001$  ~~and the~~ ~~The fixed regression of the Linear Mixed Model is the black dashed line~~  
 295 ~~the fixed effect of the mixed model~~ ~~(LME-linkage map length ~ log<sub>10</sub>(chromosome size) +~~  
 296 ~~(1 | species))~~~~LME~~, marginal  $R^2 = 0.49$ , conditional  $R^2 = 0.99$ ,  $p < 0.001$ . Species random  
 297 slopes are shown in colours. Isolines of ~~the Genome-wide r~~~~Recombination r~~~~Rates (GwRR)~~~~are~~  
 298 ~~were plotted for different values (indicated cM/Mb)~~ ~~as dotted red lines to represent regions with~~  
 299 ~~equal recombination rates and GwRR (cM.Mb<sup>-1</sup>) were annotated.~~ (B) ~~Random intercepts for~~  
 300 ~~species as a function of the species mean genomic chromosome size (Mb).~~ (C) ~~Random slopes for~~  
 301 ~~species as a function of the species mean genomic chromosome size (Mb).~~ (BD) The  
 302 excess of COs (~~i.e.~~ linkage map length minus 50 cM for the obligate CO) is ~~consistently~~  
 303 ~~positively correlated to with~~ the relative chromosome size (~~i.e.~~ chromosome size divided by the  
 304 ~~averaged chromosome size of the species~~)(size / average size of the species). Each point  
 305 represents a chromosome ( $n = 665$ ). Species are presented in different colours (57 species).  
 306 The black solid line is the linear regression across species ~~(LM-excess of CO ~ relative~~  
 307 ~~chromosome size)~~~~Linear Model~~, adjusted  $R^2 = 0.13$ ,  $p < 0.001$  ~~and~~ ~~The the~~ black dashed line  
 308 ~~is the linear mixed regression with a random species effect~~~~the fixed effect of the mixed model~~  
 309 ~~(LME-excess of CO ~ relative chromosome size + (1 | species))~~~~LME~~, marginal  $R^2 = 0.14$ ,  
 310 conditional  $R^2 = 0.86$ ,  $p < 0.001$ . Coloured solid lines represent individual regression lines  
 311 ~~(Linear Model)~~ for species with at least 5 chromosomes (55 species, ~~5-26 chromosomes per~~  
 312 ~~species~~).

Formatted: Subscript

Formatted: Subscript

Formatted: Superscript

Formatted: Subtitle

### 314 Diversity of CO patterns among flowering plants

315 Recombination landscapes along chromosomes appeared to be qualitatively very similar  
 316 within species but strongly varied between species (Figure 3, Figure S2). COs were  
 317 ~~not evenly distributed between the centre and extremities of the chromosomes.~~ In the text  
 318 below, we have used the terms proximal and distal regions, respectively, to avoid confusion

319 with the molecular composition and specific position defining telomeric and centromeric  
320 regions *stricto sensu*. Some landscapes were homogeneous along chromosomes whereas  
321 others were extremely structured with ~~the~~ recombination concentrated in the short distal  
322 parts of the genome, ~~with and wide pattern~~ variations between these two extremes  
323 (~~FigureFig~~ 3). ~~Using a broken stick representation where~~ ~~Representing~~ relative  
324 recombination rates ~~were presented~~ on ten bins of equal chromosome length (see Materials  
325 and Methods for details), we observed that the bias towards the periphery was not  
326 ubiquitous across species (~~FigureFig~~ 4), ~~unlike~~ ~~;~~ Haenel et al. (2018) ~~concluded to~~  
327 ~~assessed a~~ ~~who suggested that the~~ distal bias could be universal for chromosomes larger  
328 than 30 Mb. Only a subset of species, especially those with very large chromosomes (> 100  
329 Mb), exhibited a clear bias, ~~with COs clustered in the distal regions and with recombination~~  
330 ~~rates that were lower than expected at the centre~~ (~~FigureFig~~ 4). Despite large chromosome  
331 sizes (mean chromosome sizes = 101 Mb and 198 Mb, respectively), *Nelumbo nucifera* and  
332 *Camellia sinensis* are noticeable exceptions to this pattern, with the highest recombination  
333 rates found in the middle of the chromosomes (*Nelumbo nucifera* illustrated in ~~FigureFig~~ 3E,  
334 other species in ~~FigureFig~~ S2). For small to medium-sized chromosomes, the pattern is less  
335 clear. Most species did not show any clear structure along the chromosome but a few of  
336 them (e.g. *Capsella rubella*, *Dioscorea alata*, *Mangifera indica*, *Manihot esculenta*) showed a  
337 drop in recombination rates in the distal regions and high recombination rates in the proximal  
338 regions (*Capsella rubella* illustrated in ~~FigureFig~~ 3A).



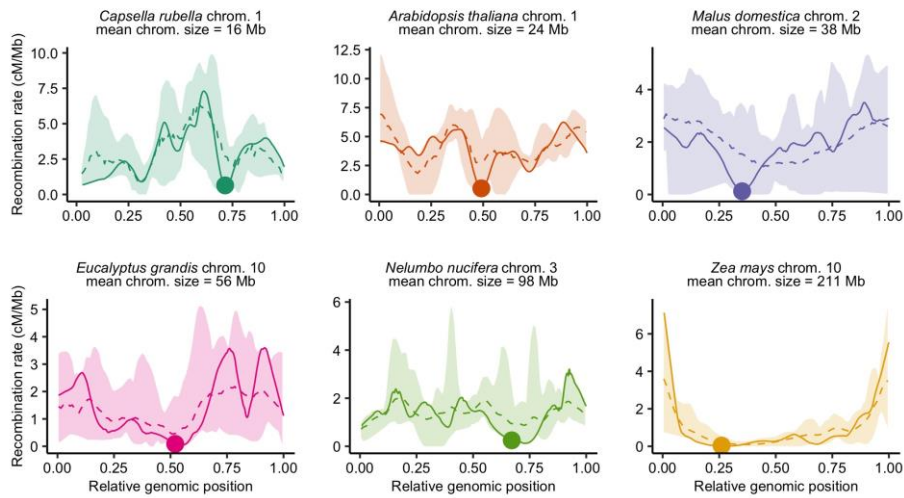

339

340 **Figure 3.** The diversity of recombination landscapes in angiosperms is exemplified by six  
 341 different emblematic species. Recombination landscapes are similar within species (the dashed  
 342 line is the average landscape for pooled chromosomes, all recombination landscapes of the  
 343 species are contained within the colour ribbon). Genomic distances (Mb) were scaled between  
 344 0 and 1 (divided by chromosome size) to compare chromosomes with different sizes. Estimates  
 345 of the recombination rates were obtained by 1,000 bootstraps replicates of over loci in windows  
 346 of 100 kb with loess regression and automatic span calibration. The averaged species  
 347 recombination landscape (dashed line) was estimated by calculating the mean recombination  
 348 rate in 100 bins along the chromosome axis, all chromosomes pooled. Similarly, the lower and  
 349 upper boundaries (pale ribbon) were estimated by taking the minimum and maximum  
 350 recombination rates in 100 bins. One chromosome per species is represented in a solid line,  
 351 with the genomic position of the centromere demarcated by a dot. The six species are ordered  
 352 by ascending mean chromosome size (Mb).

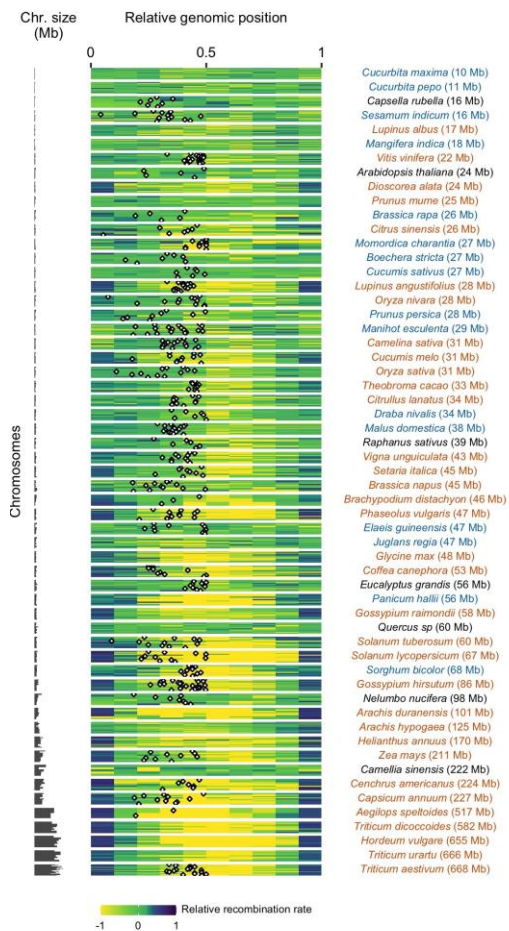

353

354 **Figure 4.** Patterns of recombination within chromosomes ( $n = 665$ ). Relative recombination  
 355 rates along the chromosome were estimated in ten bins using the broken-stick model of equal  
 356 genomic size as the expected observed relative genetic length (one-tenth) divided by the  
 357 observed expected relative genetic length (one-tenth of total size) of the bin (log-transformed log-  
 358 transformed). Values below (above) zero are recombination rates that are lower (higher) than  
 359 expected under a random distribution. Species are ordered by ascending (top to bottom)  
 360 variation in the relative recombination rates genome size (57 species). Each horizontal bar plot  
 361 represents the spatial distribution of recombination along a one chromosome. Each  
 362 chromosome was divided into ten bins of equal genomic genetic size, i.e. 1/10 of the total  
 363 genomic genetic maps size (cMMb). The relative recombination rate is the log-transformed ratio  
 364 of the expected relative genetic genomic length (one-tenth) divided by the observed relative  
 365 genetic genomic length of the bin (Mb). It means that values below zero are recombination  
 366 rates that are lower than expected under a random distribution of COs whereas values above  
 367 zero are recombination rates that are higher than expected. Whenever/When available, the

368 centromere position on the chromosome is available, this information is mapped as a red-black  
369 and white diamond and chromosomes are oriented with the longer arm on the right.  
370 Chromosome sizes (Mb) on the left correspond to each broken-stick chromosome.

371 Following Haenel et al. (2018), we calculated the periphery-bias ratio as the  
372 recombination rate in the tips of the chromosome (10% at each extremity) divided by the  
373 mean recombination rate. A ratio higher than 1 indicates a higher recombination rate in the  
374 tips than the whole chromosome. By pooling chromosomes per species, we detected a  
375 significant positive effect of chromosome length on the periphery-bias ratio across species  
376 (Spearman rank correlation coefficient  $Rho = 0.60$ ,  $p < 0.001$ ; Linear Model, adjusted  $R^2 =$   
377  $0.44$ ,  $p < 0.001$ ) (Figure 5A) with some exceptions (ex on Figures 3A and 3E). At the  
378 chromosome level, across all species the mean periphery-bias ratio is significantly higher  
379 than 1 (95% bootstrapped confidence interval = [2.06;2.32]) and skewed towards values  
380 higher than 1 but the correlation with chromosome length within species was not clear  
381 (Figure 5B, 5C, Table S6). Although we do find some ratios below 1 (Figure 5B), the  
382 distribution of the periphery-bias ratios is clearly skewed towards values higher than 1,  
383 suggesting that spatial clustering in the tips of the chromosome is a common feature among  
384 angiosperms, however with many exceptions (Figure 3A, 3E).

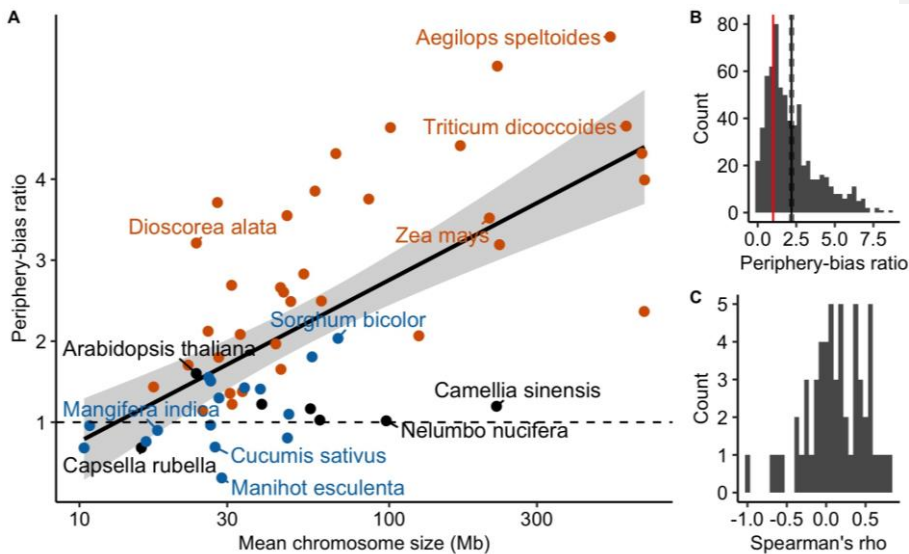

386 [FigureFig](#) 5. The periphery-bias ratio is positively correlated ~~to-with~~ chromosome genomic size. (A)  
387 ~~The Linear regression between the species mean~~ periphery-bias ratio ~~depends on and~~ the  
388 mean chromosome size (Mb, log scale) across species (n = 57 species). ~~The linear~~  
389 ~~regression line and its parametric 95% confidence interval were estimated in ggplot2 (Linear~~  
390 ~~Model, chromosome size log-transformed, adjusted R<sup>2</sup> = 0.44, p < 0.001). A periphery-bias~~  
391 ~~ratio above 1 (dashed horizontal line) indicates that recombination rates in the tips of the~~  
392 ~~chromosome are higher than the mean chromosome recombination rate.~~ Points are coloured  
393 according to the classification of the CO patterns described below (orange = distal, blue = sub-  
394 distal, black = unclassified). (B) Distribution of periphery-bias ratios (n = 665 chromosomes).  
395 The mean periphery-bias ratio and its 95% confidence interval (black solid and dashed lines)  
396 were estimated by 1,000 bootstrap replicates. The red vertical line ~~corresponds to a ratio of one~~  
397 ~~shows the theoretical value for an equal recombination in the tips compared to the rest of the~~  
398 ~~chromosome (periphery-bias ratio = 1).~~ (C) Distribution of Spearman's correlation coefficients  
399 between the periphery-bias ratio and chromosome genomic size (Mb) within species (n = 57  
400 species).

#### 403 Joint effect of telomeres and centromeres on crossover distribution 404 along chromosomes

405 Globally, recombination rates were negatively correlated ~~to-with~~ the distance to the  
406 nearest telomere ([FigureFig](#) S54, Table S7, Table S8). However, two different patterns  
407 qualitatively emerged ([FigureFig](#) 6, [FigureFig](#) S65, Table S8). In 34 species, recombination  
408 decreased from the telomere and reached a plateau after a relative genomic distance of  
409 approximately 20% of the whole chromosome (the distal model, [Fig 6A](#)), in agreement with  
410 the model suggested by Haenel et al. (2018). Sixteen species presented a sharp decrease in  
411 the most distal regions and a peak of recombination in the sub-distal regions (relative  
412 genomic distance between 0.1-0.2) followed by a slow decrease towards the centre of the  
413 chromosome (the sub-distal pattern, [Fig 6B](#)). There were ~~very a~~ few exceptions to these two  
414 patterns (six species), e.g. *Capsella rubella* consistently showed higher recombination rates  
415 in the middle of the chromosome ([FigureFig](#) 3A). Interestingly, chromosomes from species  
416 classified as having a distal pattern were significantly larger than chromosomes with a sub-  
417 distal pattern (Wilcox rank sum test, p < 0.001, [FigureFig](#) 6C). Furthermore, ~~the the species~~  
418 correlation ~~between recombination and the distance to the nearest telomere was significantly~~  
419 ~~higher -was significantly negatively correlated to-with~~ for species with larger chromosomes

420 ~~the mean chromosome length~~ (Spearman rank correlation coefficient  $Rho = -0.51$ ,  $p < 0.001$ ;  
421 ~~FigureFig S54~~).

422 When the centromere position was known, we ~~qualitatively~~ observed that the centromeres  
423 had an almost universal local suppressor effect (~~FigureFig 3, 4~~). In small and medium-sized  
424 chromosomes, the recombination was often suppressed in short restricted centromeric  
425 regions (several Mb, ~~1-5 % of the map~~) displaying drastic drops in the recombination rates,  
426 whereas the rest of the map did not seem to be affected. In larger chromosomes, the  
427 suppression of recombination extends to large regions upstream and downstream of the  
428 physical centre of the chromosome (approximately 80-90% of the chromosome; ~~FigureFig~~  
429 ~~4~~). ~~Ninety percent of chromosomes (388 chromosomes) had significantly less recombination~~  
430 ~~than the chromosome average at the centromeric index (n = 425, resampling test, 1,000~~  
431 ~~bootstraps, 95 % confidence interval). 81 chromosomes (19 %) were completely~~  
432 ~~recombination-free in the centromere. However, the transposition of centromere position~~  
433 ~~from cytological data to genomic data may be imprecise or wrongly oriented for some~~  
434 ~~chromosomes. After orienting chromosomes to map the centromeric index, 16 % of~~  
435 ~~chromosomes (70 over 425) had a recombination rate slightly higher in the inferred~~  
436 ~~centromere position than on the opposite side, thus a centromere potentially mapped on the~~  
437 ~~wrong side.~~

438 To go further, we formally compared three models that could explain the broad-scale  
439 crossover patterns we observed (~~FigureFig 7&D~~). Under the strict distal model proposed by  
440 Haenel et al. (2018) (~~M1~~), the centromere does not play any role beyond its local suppressor  
441 effect, and therefore ~~we expect~~ an equal distribution of crossovers on both sides of the  
442 chromosome ~~is expected~~, independently of centromere position: ~~In other words, we should~~  
443 ~~expect~~  $\frac{d(1/2)}{d(1)} = 0.5$ , where  $d(1/2)$  is the genetic distance (cM) to the middle of the  
444 chromosome and  $d(1)$  is the total genetic distance (cM). In addition, ~~to this model (M1)~~, we  
445 tested two ~~nested alternative~~ models adding a centromere effect. We assumed that the

446 position of the centromere,  $d(c)$ , has an effect on the distribution of crossovers along the  
447 chromosome. Models M2 'telomere + centromere + one CO per arm' and M3 'telomere +  
448 centromere + one CO per chromosome'; both assume that the relative genetic distance of a  
449 chromosome arm is proportional to its relative genomic size. However, ~~models M2 and~~  
450 ~~M3~~they differ in the number and distribution of mandatory COs. At least one CO in each  
451 chromosome arm (50 cM) is mandatory in M2 whereas only one CO is mandatory for the  
452 entire chromosome in M3. For species whose centromere position was known (37 species,  
453 425 chromosomes) we regressed the observed values against the theoretical predictions of  
454 the three models and compared them ~~Based on using~~ goodness-of-fit criteria (adjusted  $R^2$ ,  
455 AIC, BIC), ~~we used linear regression to compare the theoretical predictions of the three~~  
456 ~~competing models to the observed values for Marey maps in which the centromere position~~  
457 ~~was known (37 species, 425 chromosomes).~~ Model M2 was generally rejected since 22% of  
458 chromosomes showed less than 50 cM in at least one arm, even though it was supported in  
459 a handful of species (Table 1), and model M1 was not supported by any species. Model M3  
460 was the best supported model (30 out of 37 species), with good predictive power (Spearman  
461 rank correlation between predicted and observed values:  $Rho = 0.72$ ,  $p < 0.001$ ; Tables 1,  
462 S9, S10). Given that some chromosomes had one chromosome arm shorter than 50 cM,  
463 which is incompatible with one mandatory CO per arm in model M2, we also performed a  
464 ~~second model selection~~compared the three models on a subset of chromosomes with at  
465 least 50 cM on each chromosome arm ( $n = 36$  species, 333 chromosomes) which confirmed  
466 that model M3 was the best model. Similarly, we reran the model without chromosomes with  
467 uncertainty on the centromere position ( $n = 37$  species, 355 chromosomes) and found the  
468 same results.

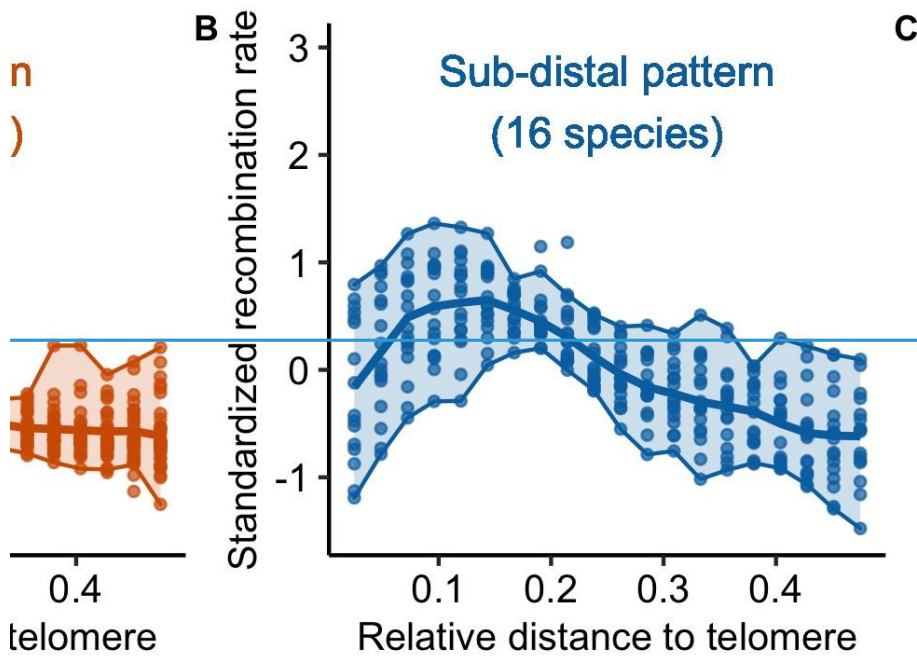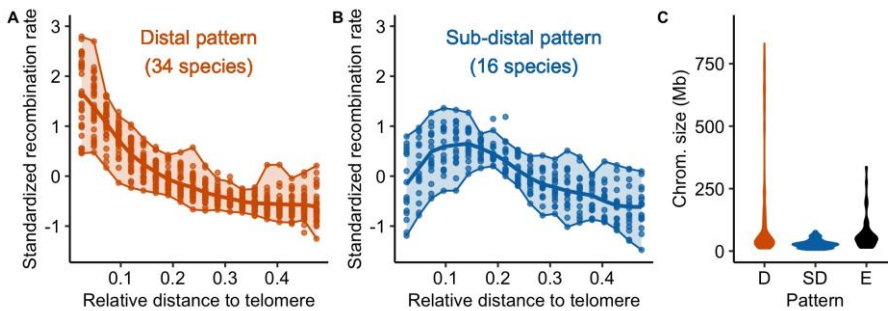

469  
470  
471 **Figure Fig 6. Distribution of cCrossover: main patterns and possible models. (A and B) can be**  
 472 **classified in two different patterns, where recombination rates are higher in distal regions and**  
 473 **lower near the centre of the chromosome. Standardized recombination rates for species**  
 474 **(centred-reduced cM/Mb, chromosomes pooled per species, n = 57 species) are expressed as**  
 475 **a function of the relative genomic distance from the telomere in 20 bins, representing the two**  
 476 **main patterns (orange = distal, blue = sub-distal). Two patterns were identified and species**  
 477 **were pooled accordingly, with 7The seven unclassified species (orange = distal, blue = sub-**  
 478 **distal, black = unclassified), are not shown. (A) In the distal pattern (34 species), recombination**  
 479 **rates decreased immediately from the tip of the chromosome (left plot, orange line and ribbon).**  
 480 **(B) In the sub-distal pattern (16 species), recombination rates were reduced in the distal**  
 481 **regions and the peak of recombination was in the sub-distal region (right plot, blue line and**  
 482 **ribbon). Chromosomes were split in half and 0.5 corresponds to the centre of the chromosome.**  
 483 **In each plot, the solid line represents the mean recombination rate estimated in a bin (20 bins)**



484 and each dot per bin represents the average of a species. Chromosomes were split in half,  
 485 where a distance of 0.5 is the centre of the chromosome. Then, chromosomes were pooled per  
 486 species (each point is the mean recombination rate of all chromosomes in a species, for a  
 487 distance bin to the tip of the chromosome). Upper and lower boundaries of the ribbon represent  
 488 the maximum and minimum values attained for a particular pattern. Patterns that were not  
 489 classified (7 species) were represented by individual loess regressions using black dashed  
 490 lines. (C) Distribution of chromosome genomic sizes (Mb) in for each pattern. (D) Schematic  
 491 representation of the Three three competing models for the two main patterns, compatible with  
 492 the distal and sub-distal crossover patterns were tested using formal tests on predictions.  
 493 Models are compatible with the distal and sub-distal crossover patterns we identified with an  
 494 example of a centromere position at 1/3 of the chromosome. Predictions are made on the  
 495 distribution of crossovers between both chromosome sides (separated by the middle of the  
 496 chromosome, model 1) or chromosome arms (separated by the centromere, models 2 and 3).  
 497 Symbolic chromosomes illustrate the distribution of crossovers expected under each model and  
 498 for each pattern. Model 3 is the best model (box).

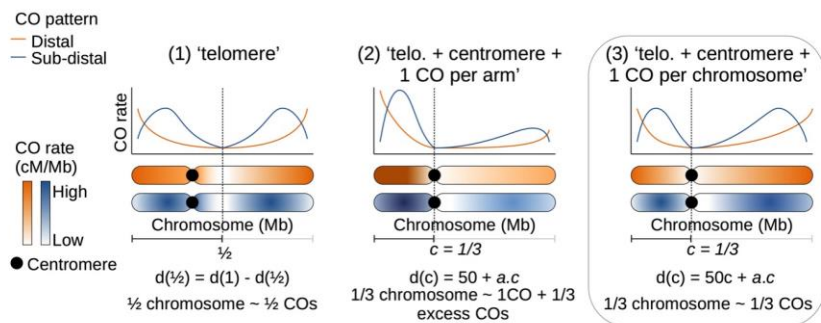

499

500 Fig 7. Possible models of crossover patterns. Schematic representation of the three competing  
 501 models for the two main patterns, with an example of a centromere position at 1/3 of the  
 502 chromosome. Model 3 is the best model (box).

503

504

505

Formatted: Normal

Formatted: Normal



506 Table 1. Model selection for the telomere/centromere effect (n = 37 species with a centromere  
 507 position, 425 chromosomes). Three competing models were compared based on the adjusted  
 508  $R^2$ , p-value and AIC-BIC criteria among chromosomes (the best supported model is in bold  
 509 characters). The number of species supporting each model was calculated based on the  
 510 adjusted  $R^2$  within species, for all species with at least five chromosomes. (1) 'telomere' model.  
 511 (2) 'telomere + centromere + one CO per arm' model. (3) 'telomere + centromere + one CO per  
 512 chromosome' model.  $d(c)$  is the genetic distance to the centromere.  $d(1)$  is the total genetic  
 513 distance. A second model selection was done on a subset of chromosomes with at least 50 cM  
 514 on each chromosome arm (n = 36 species, 333 chromosomes).

| #                                          | Model                      | Expected                         | Adjusted $R^2$ | p       | AIC    | BIC    | Species |
|--------------------------------------------|----------------------------|----------------------------------|----------------|---------|--------|--------|---------|
| Full dataset (37 species, 425 chromosomes) |                            |                                  |                |         |        |        |         |
| 1                                          | Telomere                   | $d(1/2) / d(1) = 0.5$            | 0.22           | < 0.001 | -477.8 | -465.7 | 0       |
| 2                                          | Tel. + Cent. + CO per arm  | $(d(c) - 50) / (d(1) - 100) = c$ | -              | 0.72    | 3098.2 | 3110.4 | 7       |
| 3                                          | Tel. + Cent. + CO per chr. | $d(c) / d(1) = c$                | 0.51           | < 0.001 | -476.6 | -464.5 | 30      |
| Subset (36 species, 333 chromosomes)       |                            |                                  |                |         |        |        |         |
| 1                                          | Telomere                   | $d(1/2) / d(1) = 0.5$            | 0.18           | < 0.001 | -407.5 | -396.1 | 0       |
| 2                                          | Tel. + Cent. + CO per arm  | $(d(c) - 50) / (d(1) - 100) = c$ | -0.001         | 0.42    | 1939.1 | 1950.5 | 10      |
| 3                                          | Tel. + Cent. + CO per chr. | $d(c) / d(1) = c$                | 0.50           | < 0.001 | -396   | -384.6 | 26      |

515 **Recombination rates are positively correlated ~~to~~ with gene density**

516 At a fine scale, it has been shown in a few species that COs preferentially occur in gene  
 517 promoters. The scale of 100 kb used here is too large to directly test whether this is a  
 518 common pattern shared among angiosperms. Instead, like in Haenel et al. (2018), we  
 519 assessed whether recombination increased with gene density. Forty-one genomes were  
 520 annotated with gene positions. Across chromosomes, the distribution of chromosomal  
 521 correlations between gene count and recombination rate was clearly skewed towards  
 522 positive values, independently of the previously described CO patterns (mean Spearman's  
 523 rank correlation = 0.46 [0.43; 0.49]; FigureFig 87A). Ninety-one percent (~~91%~~) of 483  
 524 chromosomes (41 species) showed a significant correlation between the number of genes  
 525 and recombination rate at a 100 kb scale. Yet the strength of the relationship greatly varied  
 526 across species and did not correlate with usual predictors such as the chromosome length or  
 527 the genome-wide recombination rate (FigureFig 87B). Overall, standardized recombination  
 528 rates (subtracting the mean and dividing by the standard deviation to allow comparison

529 among species) consistently increased with the number of genes in most species (linear  
530 quadratic regression, adjusted  $R^2 = 0.62$ ,  $p < 0.001$ ; [FigureFig 87C](#)).

Formatted: Superscript

531 As for recombination patterns, we classified patterns of gene density along chromosomes  
532 in three categories: distal, sub-distal and exceptions ([FigureFig S76](#)). Most species (30 out  
533 of 41) were classified in the same gene density and recombination pattern (Table S11).  
534 Moreover, when we classified species as a function of recombination patterns, we  
535 qualitatively observed the same pattern for gene density and recombination ([FigureFig 98](#)),  
536 suggesting that recombination and gene density share the same non-random distribution  
537 along the genome.

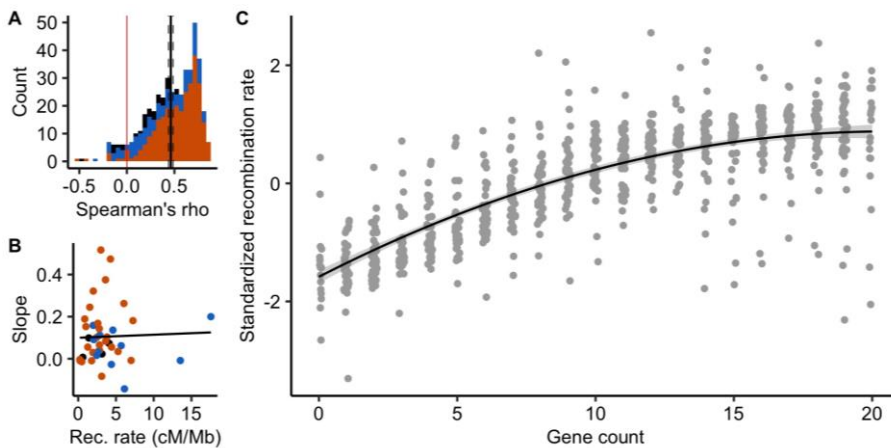

538

539 [FigureFig 87](#). Recombination rates are positively correlated ~~to~~with gene density ( $n = 483$   
540 chromosomes, 41 species). (A) Distribution of chromosome Spearman's rank correlations  
541 between the number of genes and the recombination rate in 100 kb windows. The black vertical  
542 line is the mean correlation with a 95% confidence interval (dashed lines) estimated by 1,000  
543 bootstrap replicates. Colours correspond to CO patterns (orange = distal, blue = sub-distal,  
544 black = exception). (B) Slopes of the species linear regression between gene count and  
545 recombination rates are independent of the species averaged recombination rate (Linear  
546 Model, adjusted  $R^2 = -0.02$ ,  $p = 0.83$ ). (C) Standardized recombination rates for each number of  
547 genes in a 100 kb window (centred-reduced, chromosomes pooled per species, one colour per  
548 species) estimated by 1,000 bootstraps and standardized within species. The gene count was  
549 estimated by counting the number of gene starting positions within each 100 kb window. The  
550 black line with a grey ribbon is the quadratic regression estimated by linear regression with a  
551 95% parametric confidence interval (Linear Model, adjusted  $R^2 = 0.62$ ,  $p < 0.001$ ).

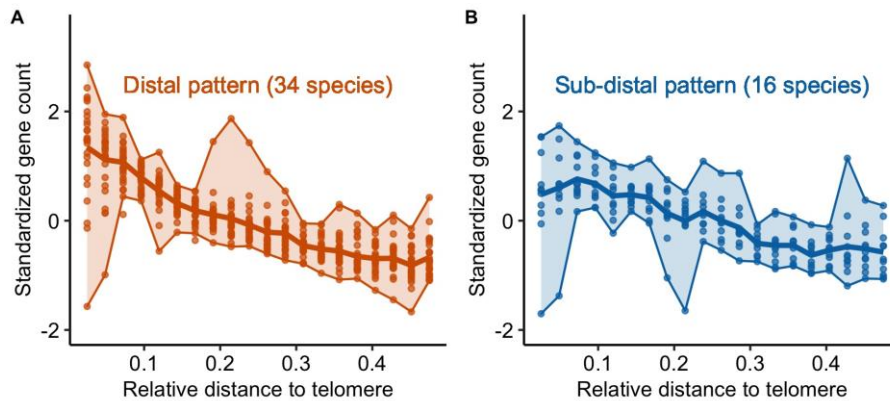

552

553 [FigureFig 98](#). Gene counts patterns along the chromosome are correlated ~~to-with~~ CO patterns (n =  
 554 41 species). Standardized gene count (centred-reduced) as a function of the relative distance  
 555 from the tip to the middle of the chromosome (genomic distances distributed in 20 bins). We  
 556 used the same groups as identified for the CO pattern in [FigureFig 6](#): (a) distal [pattern](#) vs (b)  
 557 sub-distal [pattern](#).) ~~and observed the same patterns along the chromosome. The solid line~~  
 558 ~~represents the mean gene count estimated in a bin and the upper and lower boundaries of the~~  
 559 ~~ribbon represent the maximum and minimum values in a bin. Patterns that were not classified~~  
 560 ~~(4 species with a gene annotation) were represented by loess regression in grey dashed lines.~~  
 561 ~~To estimate gene counts in bins of relative distances, chromosomes were split in half, where a~~  
 562 ~~distance of 0.5 is the centre of the chromosome. Chromosomes were pooled per species (n =~~  
 563 ~~483 chromosomes). Same legend as [FigureFig 6](#).~~

## 564 Genetic shuffling

565 We ~~showed-confirmed~~ that recombination is unevenly distributed in genomes, which  
 566 should affect how genetic variation is shuffled during meiosis. [Genetic shuffling participates](#)  
 567 [to the random reassortment of genes between parental homologous chromosomes](#). To  
 568 quantify how much ~~the~~ genetic shuffling depends on the distribution of COs, we estimated  
 569 ~~the-its~~ intrachromosomal component, ~~of the genetic shuffling~~  $\bar{r}_{intra}$ , ~~as~~ described in equation  
 570 10 ~~provided byin~~ Veller et al. (2019). The  $\bar{r}_{intra}$  gives, ~~for a chromosome~~, a measure of the  
 571 probability ~~of-for~~ a random pair of loci to be shuffled by a crossover. As expected, genetic  
 572 shuffling was positively and significantly correlated ~~with-tewith~~ linkage map length ([LMER](#)  
 573  $\bar{r}_{intra} \sim \text{linkage map length} + (1 | \text{species})$  ~~Linear Mixed Model~~, marginal  $R^2 = 0.43$ ,  
 574 conditional  $R^2 = 0.88$ ,  $p < 0.001$ , [FigureFig S87](#)). COs clustered in distal regions are  
 575 supposedly ~~less-efficient~~ ~~to generate less genetic shuffling~~ than COs evenly distributed in the

576 chromosome. At a chromosomal level, ~~linear mixed regression (controlling for a species~~  
577 ~~effect) revealed a low but significant negative effect of~~ the periphery-bias ratio as a low but  
578 significant effect on ~~the~~ genetic shuffling, consistent among species (~~LMER~~  $\bar{r}_{intra} \sim$   
579 periphery-bias ratio + (1 | species), marginal  $R^2 = 0.05$ , conditional  $R^2 = 0.68$ ,  $p < 0.001$ ,  
580 [Figure S98](#)). The more COs are clustered in the tips of the chromosome, the lower the  
581 chromosomal genetic shuffling. These results verify the analytical predictions of Veller et al.  
582 (2019), although the strength of ~~this~~ the effect remains weak.

583 However, the distributions of COs and genes are both non-random and often correlated  
584 ([Figures 87 and S109](#)). Genomic distances measured in base pairs may not be the most  
585 appropriate measure of genetic shuffling among functional genomic components. Thus, we  
586 measured genomic distances in gene distances (i.e. the cumulative number of genes along  
587 the chromosome) instead of base pairs. Marey maps most often appeared more  
588 homogeneous when scaled on gene distances instead of base pair distances, with 70% (316  
589 over 450) of Marey maps showing a smaller ~~scale~~ departure from a random distribution  
590 ([Figures 109, S110](#), Table S11). Globally, a subset of 30 species ~~have~~ has more  
591 homogeneous Marey maps with gene distances whereas 11 others are quantitatively more  
592 heterogeneous (notably *Capsella rubella* and *Arabidopsis thaliana*), although this could be  
593 due to low quality annotations making it difficult to precisely estimate the gene distances for  
594 some of them (e.g. *Sesamum indicum*). In most cases, genetic shuffling were slightly higher  
595 when gene distances were used instead of base pairs ([Figure 110](#); mean = 0.22 for base  
596 pairs; mean = 0.26 for gene distances; Wilcoxon rank sum test with continuity correction,  $p <$   
597 0.001), implying that the genetic shuffling was more efficient among coding regions than the  
598 whole genome among regions randomly sampled in the genome with a distribution slightly  
599 skewed towards higher values for gene distances. Interestingly, the increase in genetic  
600 shuffling ~~when scaled with~~ calculated in gene distances compared to genomic distance was  
601 more pronounced for longer chromosomes — which are often the most heterogeneous ones,  
602 characterized by a distal pattern — whereas we saw little effect on smaller chromosomes

603 characterized by a sub-distal pattern ( $\text{LMER-difference in } \bar{r}_{\text{intra}} \sim \log_{10}(\text{chromosome size}) +$   
 604  $(1 | \text{species})$  Linear Mixed Model, marginal  $R^2 = 0.2146$ , conditional  $R^2 = 0.873$ ,  $p < 0.001$ ,  
 605 Figure Fig 119).

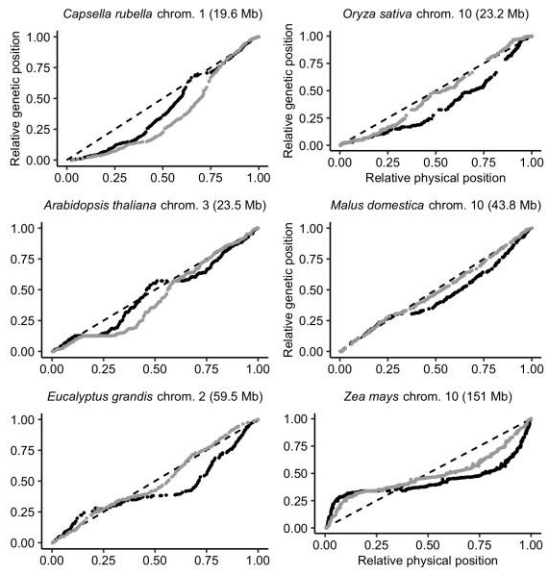

606

607 Figure Fig 109. Marey maps of six chromosomes with the relative physical distance expressed in  
 608 genomic distances (black dots, position in the genome in Mb) or in gene distances (grey dots,  
 609 position measured as the cumulative number of genes along the chromosome.)-Marey maps  
 610 are ordered by ascending chromosome size (Mb). ~~The relative genetic position is the position of~~  
 611 ~~the marker on the linkage map.~~ The diagonal dashed line represents a theoretical random  
 612 distribution of COs along the chromosome.

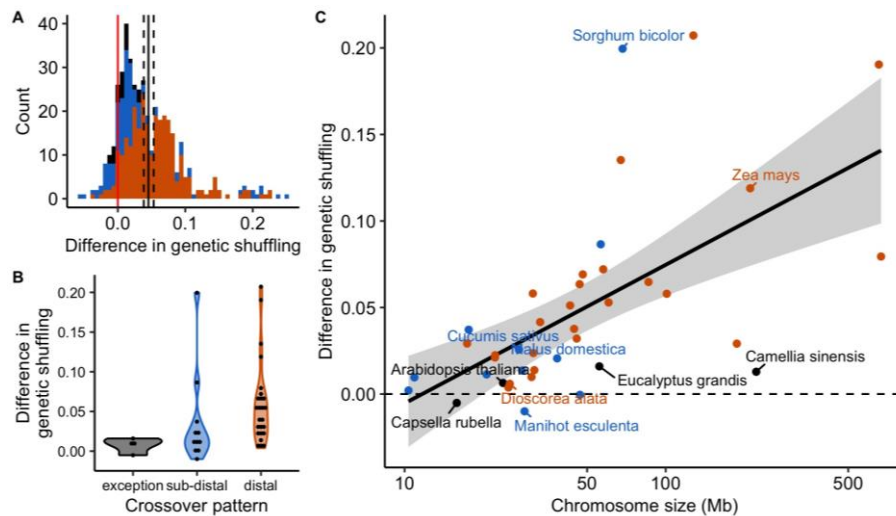

613

614 **Figure 10.** Differences in genetic shuffling between estimates based on genomic distances  
 615 (Mb) and gene distances (cumulative number of genes). The difference is the genetic shuffling  
 616 ~~in (gene distances) minus the genetic shuffling in (genomic distances), thus positive values~~  
 617 ~~indicate an increase in the genetic shuffling based on gene distances compared to genomic~~  
 618 ~~distances~~. Colours correspond to CO patterns (orange = distal, blue = sub-distal, black =  
 619 exception). (A) Distribution of the chromosome differences in the genetic shuffling (n = 444  
 620 chromosomes). (B) Distributions of the species difference in the genetic shuffling (n = 41  
 621 species, chromosomes pooled). (C) Species differences in the genetic shuffling are positively  
 622 correlated ~~to with~~ the averaged chromosome size (Linear Model, adjusted  $R^2 = 0.20$ ,  $p = 0.002$ ,  
 623 n = 41, 95% parametric confidence interval).

## 624 Discussion

625 Based on a large ~~and~~, curated dataset, we provided ~~here~~, to ~~the best of~~ our knowledge,  
 626 the largest description of recombination landscapes among flowering plants. In addition to  
 627 confirming that both the chromosome-wide recombination rate and the heterogeneity of  
 628 recombination landscapes vary according to chromosome length, we identified two distinct  
 629 CO patterns and we proposed a new model that ~~builds on extended~~ the strict telomere model  
 630 recently ~~suggested proposed~~ by Haenel et al. (2018). Moreover, the consistent correlation  
 631 between recombination and gene density ~~that we observed suggests that crossover initiation~~  
 632 ~~in gene regulatory sequences could be shared among angiosperms. This sheds new light~~  
 633 ~~on~~ may have implications for the evolution of recombination landscapes and whether the

634 [distribution of COs is optimal for](#) the efficacy of genetic shuffling ~~and the evolution of~~  
635 ~~recombination landscapes.~~

## 636 Chromosome size and recombination rate

637 We showed that, for most species, the smallest chromosome had roughly one or two  
638 COs, independently of chromosome size. This is in agreement with the idea that CO  
639 assurance is a ubiquitous regulation process among angiosperms (Pazhayam et al., 2021).  
640 Moreover, ~~it seems that~~ this constraint imposes a kind of basal recombination rate for each  
641 species, on the order of  $50/S_c$  cM/Mb, where  $S_c$  is the size of the lowest chromosome in Mb.  
642 Regardless of the genome size (which ranges three orders of magnitude or more), the  
643 number of COs remains relatively stable amongst species, most probably under the joint  
644 influence of CO assurance, interference and homeostasis (Otto and Payseur, 2019; Stapley  
645 et al., 2017; Wang et al., 2015). As a result, averaged recombination rates are negatively  
646 correlated ~~to with~~ chromosome lengths, as already known in plants (Haenel et al., 2018;  
647 Tiley and Burleigh, 2015), ~~and in contrast to fungi and animals (Stapley et al., 2017).~~

648 ~~Surprisingly, we found that, However, there is no universal relationship between the~~  
649 ~~absolute size of a chromosome and its mean recombination rate. Although the average~~  
650 ~~recombination rate of a species is well predicted by its average chromosome size, the~~  
651 ~~recombination rates of each chromosome separately are not well predicted by their absolute~~  
652 ~~chromosome size. Instead, variation within species is much better explained by the within-a~~  
653 ~~species, relative chromosome size, and surprisingly, this relationship seems to be roughly~~  
654 ~~the same among species (see [Figures Fig 1 and 2](#)). was a stronger determinant of the~~  
655 ~~genetic map than absolute chromosome size.~~ This suggests that CO interference is  
656 proportional to the relative size of the chromosome, as has been empirically observed in  
657 some plants (Ferreira et al., 2021). Although it is not clear yet which interference distance  
658 unit is the most relevant, genomic distances (in Mb) are excluded in most models of  
659 interference in favour of genetic distances (cM) (Foss et al., 1993) or, more likely, the length

660 of the synaptonemal complex in micrometres (Capilla-Pérez et al., 2021; Kleckner et al.,  
661 2004; Lloyd and Jenczewski, 2019; Zickler and Kleckner, 2015). Both scales ~~(in genetic~~  
662 ~~distances or in size) of the synaptonemal complex, in micrometres,~~ match our observation of  
663 a relative size effect. Within species, genetic maps increase with chromosome size, but  
664 among species they are uncorrelated and far less variable than genome sizes, which makes  
665 the relative chromosome size the main determinant of recombination rate variations among  
666 species. Similarly, physical sizes (in micrometres) at meiosis do not seem to scale with  
667 genome size, as chromosomal organization (nucleosomes, chromatin loops) strongly  
668 reduces the variation that could be expected given the genome size (Otto and Payseur,  
669 2019).

## 670 Recombination patterns along chromosomes

671 We observed a global trend towards higher recombination rates in sub-distal regions  
672 (Gaut et al., 2007; Haenel et al., 2018). The distal bias increased with chromosome length,  
673 in agreement with the conclusions of Haenel et al. (2018), although our methods differ in  
674 resolution. We analysed species and chromosomes separately whereas Haenel et al. (2018)  
675 used averages over the different patterns, thereby masking chromosome- and species-  
676 specific particularities. For example, they did not detect the sub-distal pattern ~~and neither~~  
677 unclassified exceptions, whereas they seem common among species (146 and 7 species  
678 respectively). So far, little is known about the mechanisms that could explain the link  
679 between the distal bias and chromosome length. Even if models of CO interference yield  
680 similar patterns (Falque et al., 2007; Zhang et al., 2014), the conceptual model of Haenel et  
681 al. (2018) is still the only one to explicitly consider chromosome length. The telomere effect  
682 is thought to act at a broad chromosome scale over long genomic distances. The decision of  
683 double strand breaks (DSBs) to engage in the CO pathway is made early on during meiosis  
684 and the early ~~association-chromosome pairing beginning inef~~ telomeres is thought to favour  
685 distal COs (Bishop and Zickler, 2004; Higgins et al., 2012; Hinch et al., 2019). In barley,  
686 when the relative timing of the first stages of the meiotic program was shortened, COs were



687 redistributed towards proximal regions (Higgins et al., 2012), as later observed in wheat  
688 (Osman et al., 2021).

689 Haenel et al. (2018) proposed that distance to the telomere is driving CO positioning, and  
690 therefore it should produce a symmetrical U-shaped pattern along chromosomes. However,  
691 a formal test showed that this model was too simple and that centromeres also played a role  
692 in the distribution of COs between chromosome arms. The best model (M3: 'telomere +  
693 centromere + one CO per chromosome') that we have proposed ~~in this work~~ suggests that  
694 centromeres do not only have ~~just~~ a local effect but ~~they~~ also influence the symmetry of  
695 recombination landscapes over long distances, though a large proportion of our sample is  
696 metacentric, which might limit the detection of an effect. The local suppression of COs in  
697 centromeric regions is well known and largely conserved among species and seems a  
698 strong constitutive feature restricted to a short centromeric region, basically the kinetochore  
699 (Ellermeier et al., 2010; Fernandes et al., 2019). But the extent of ~~a larger~~ the pericentromeric  
700 region varies drastically, most probably under the influence of DNA methylation, chromatin  
701 accessibility or RNA interference (Choi et al., 2018; Ellermeier et al., 2010; Hartmann et al.,  
702 2019; Pan et al., 2011). However, how centromeres (especially non-metacentric ones) may  
703 affect CO distribution at larger scales still needs to be determined.

#### 704 Diversity of patterns among species

705 In addition to the role of centromeres, we also observed a departure from the prediction  
706 that recombination rates should do not always decrease linearlymonotonically with the  
707 distance to the tip of the chromosome, showing that the distal model is not generally found  
708 among plants. We observed at least two different crossover patterns among plant species.  
709 Only 34 out of 57 species support a process starting ~~in~~ at the tips (distal model), and 16  
710 present the highest recombination rates in sub-distal regions, while seven species remain  
711 unclassified, which is at the limit of our visual classification. Globally, the distal pattern and  
712 distal bias seem to occur more often in larger chromosomes, but our data lack species with  
713 giant genomes. Giant genomes are not rare in plants, and we cannot extrapolate our

714 conclusions to the upper range of the genome size variation (Pellicer et al., 2018).  
715 Astonishingly, a low-density genetic map in *Allium* showed higher recombination rates in the  
716 proximal regions, which is opposite to the major trend we found (Khrustaleva et al., 2005).  
717 Genera with giant genomes such as *Lilium* or *Allium* would have been valuable assets in our  
718 dataset, but the actual genomic and linkage data are relatively incomplete (Jo et al., 2017;  
719 Shahin et al., 2011).

720 ~~Contrary to the single pattern described by Haenel et al. (2018), this pattern diversity is~~  
721 ~~more~~The occurrence of various recombination patterns is in agreement with what is known  
722 of the timing of meiosis and heterochiasmy ~~(the fact that male and female meiosis have~~  
723 ~~different CO patterns)~~. Despite the strong conservation of the main meiotic mechanism in  
724 plants, differences in the balance between key components may produce distinct CO  
725 patterns (de Massy, 2013; Higgins et al., 2012; Kuo et al., 2021; Zelkowski et al., 2019). For  
726 example, the ZYP1 ~~telomere-led recombination~~ and the ASY1 proteins ~~are two~~have  
727 antagonistic ~~forces acting~~effects on the formation of the synaptonemal complex in plants  
728 (Lambing et al., 2020). In barley and wheat, linearization of the chromosome axis ~~triggered~~  
729 ~~by ZYP1~~ is gradual along the chromosome ~~and~~ initiated in distal regions, ~~whereas early~~  
730 ~~DSBs form in the~~forming the telomere bouquet ~~where early DSBs form~~ (Higgins et al., 2012;  
731 Osman et al., 2021). In contrast, chromosome axes are formed at a similar time in  
732 *Arabidopsis thaliana* and chromosomes are gradually enriched in ASY1 from the telomeres  
733 to the centromeres; a gene-dosage component favours synapsis and ultimately COs towards  
734 the proximal regions (Lambing et al., 2020). It appears that the timing of the meiotic  
735 programme is important for the distal bias, as it involves changes in the relative contribution  
736 of each meiotic component that could explain the re-localization of COs (Higgins et al., 2012;  
737 Lambing et al., 2020). Therefore, the different patterns we observed may be explained by  
738 the different balance and timing of the expression of shared key regulators of CO patterning  
739 such as ZYP1 and ASY1 (Kuo et al., 2021). It is interesting to note that this is also true for  
740 mechanistic models of interference. [Zhang et al. \(2014\)](#) assessed that tThe 'beam-film'

741 model is able to fit both CO patterns, regardless ~~if-whether~~ the tips of the chromosomes  
742 have an effect on interference or not, i.e. clamping ~~(Zhang et al., 2014)~~. If ~~there is~~ clamping  
743 ~~is assumed, the model predicts that~~ mechanical stress culminates in the extremities of the  
744 chromosome leading to high CO rates at the periphery where it is released first. In contrast,  
745 when clamping is limited, mechanical stress is released in the tips of the chromosome and  
746 COs occur further from the tips, until a threshold of mechanical stress is reached. The  
747 observed sub-distal pattern fits these predictions.

748 The two patterns of recombination we described here can also be observed in opposite  
749 sexes within the same [plant species](#), i.e. [heterochiasmy](#) (Capilla-Pérez et al., 2021; [Dukić](#)  
750 [and Bomblies, 2022](#); Sardell and Kirkpatrick, 2019). Marked heterochiasmy variations  
751 between species, [a feature shared among plants and animals](#), could influence the resulting  
752 sex-averaged recombination landscape (Sardell and Kirkpatrick, 2019). The sex-averaged  
753 telomere effect can be thought of as the product of two independent sex-specific landscapes  
754 although it is not clear how sex-specific maps ultimately contribute to the sex-averaged one  
755 (Johnston et al., 2016; Lenormand et al., 2016). Recombination is usually biased towards  
756 the tips of the chromosome in male recombination maps, but is ~~more~~ evenly distributed in  
757 female maps in ~~most the few plant species with available data~~ (Sardell and Kirkpatrick,  
758 2019). In *Arabidopsis thaliana*, male meiosis has higher CO rates within the tips of the  
759 chromosome, as ~~it~~ has been observed in other species with large chromosomes, whereas  
760 female meiosis is more homogeneously distributed, with the lowest rates found in the distal  
761 regions (Capilla-Pérez et al., 2021). Shorter chromosome axes in *A. thaliana* female meiosis  
762 could induce fewer DSBs and class II non-interfering COs (Lloyd and Jenczewski, 2019).  
763 Conversely, in maize, the distal bias is similar in both sexes, despite higher CO rates for  
764 females (Kianian et al., 2018). Heterochiasmy is not universal in plants (Melamed-Bessudo  
765 et al., 2016), and we suggest that the variation in recombination landscapes could also result  
766 from variation in heterochiasmy among species, as it has been suggested for broad-scale  
767 differences in recombination landscapes between *A. thaliana* and its relative *A. arenosa*

768 (Dukić and Bomblies, 2022). This hypothesis should be tested further as more sex-specific  
769 genetic maps become available.

## 770 Recombination landscapes, gene density and genetic shuffling

771 We observed a strong convergence between CO patterns and gene density patterns. This  
772 correlation is consistent in our dataset despite possible errors in genome annotation and we  
773 also observed two different gene density patterns globally corresponding to similar CO  
774 patterns, emphasizing the close link between recombination and gene density. Interestingly,  
775 ~~gene density also had a strong correlation with the recombination rate~~ we found the same  
776 correlation in species with atypical chromosomes. For example, *Camellia sinensis* and  
777 *Nelumbo nucifera* have large genomes with homogenous recombination landscapes,  
778 ~~whereas large genomes are usually associated with a distal pattern and~~ A a recent  
779 annotation of ~~a new genome assembly of the~~ *Nelumbo nucifera* genome showed that genes  
780 are also evenly distributed along chromosomes at a broad scale (Shi et al., 2020), similar to  
781 *Camellia sinensis* (Wei et al., 2018). In wheat and rye, the analysis of the effect of  
782 chromosome rearrangement on recombination also suggests that CO localization is more  
783 locus-specific than location-specific: after inversions of distal and interstitial segments, COs  
784 were relocated to the new position on the distal segment (Lukaszewski, 2008; Lukaszewski  
785 et al., 2012). Overall, the parallel between gene density and recombination landscapes,  
786 confirmed by these two exceptions, is in agreement with the preferential occurrence of COs  
787 in gene regulatory sequences (Choi et al., 2018; He et al., 2017; Marand et al., 2019), and  
788 suggests that this may be a general pattern shared among angiosperms. Thus, gene  
789 distribution along chromosomes could be a main driver of recombination landscapes simply  
790 by determining where COs may preferentially occur. It should be noted that since the gene  
791 number is usually positively correlated ~~with~~ towith chromosome size within a species but is  
792 roughly independent of genome size among species, this hypothesis also matches with the  
793 relative-size effect discussed above.

794 However, gene density and recombination rates are both correlated ~~to~~with many other  
795 genomic features, such as transposable elements ~~(Marand et al., 2019)(Charlesworth et al.,~~  
796 ~~1994; Kent et al., 2017)~~. The accumulation of transposable elements in low recombining  
797 regions would progressively decrease gene density in the region, ~~and~~ would eventually  
798 result in a positive correlation between gene density and recombination ~~(Kent et al., 2017)~~.  
799 However, the correlation of recombination rates with transposable elements is not always  
800 clear and different TE families have opposite correlations (Kent et al., 2017; Underwood and  
801 Choi, 2019). ~~The positive association of COs and gene regulatory sequences, including fine-~~  
802 ~~scale correlations, appears more robust (Choi et al., 2013; He et al., 2017; Marand et al.,~~  
803 ~~2019), but c~~ausality mechanisms of these multiple interactions still need to be clarified. The  
804 use of fine scale recombination maps (using very large mapping populations or LD maps)  
805 should help identifying the respective role of genic regions (especially the role of promoters)  
806 and transposable elements (or other genomic features).

807 Irrespective of the underlying mechanism, our finding implies that the CO distribution  
808 ultimately scales with the gene distribution. Therefore, in most species, COs have a more  
809 even distribution between genes than between random genomic locations (FigureFig 109).  
810 The redistribution of COs towards functional regions could be a simple consequence of COs  
811 occurring within gene regulatory sequences, but it has important evolutionary implications  
812 such as increasing the genetic shuffling and homogenizing the probability of two random  
813 genes to recombine, especially for large genomes that exhibit the strongest difference in  
814 genetic shuffling between genes and between genomic locations (FigureFig 110). Therefore,  
815 CO patterning (and not only the global CO rate) could be under selection not only for its  
816 direct effect on the functioning of meiosis but also for its indirect effects on selection efficacy  
817 (Otto and Payseur, 2019). Recombination decreases linkage disequilibrium and negative  
818 interferences between adjacent loci (e.g. Hill-Robertson Interference), and thus locally  
819 increases the efficacy of selection. Functional sites are targets for selection (Nachman and  
820 Payseur, 2012) and we found higher recombination rates in functional regions, meaning that

821 only a few genes are ultimately excluded from the benefits of recombination, even under the  
822 most pronounced distal bias.

823 Higher recombination rates in gene-rich regions could provide a satisfying explanation as  
824 to why the distal bias is maintained among species despite its theoretical lack of efficacy for  
825 genetic shuffling (Veller et al., 2019). The association between CO hotspots and gene  
826 regulatory sequences is mechanistically driven by chromatin accessibility, but it does not  
827 exclude the evolution of the mechanism itself towards the benefits of recombining more in  
828 gene-rich regions (Lenormand et al., 2016). However, slight variations in genetic shuffling  
829 caused by the non-random distribution of COs are less likely to be under strong selection  
830 compared to stabilizing selection on molecular constraints for chromosome pairing and  
831 segregation (Ritz et al., 2017), although interference is sometimes likely to evolve towards  
832 relaxed physical constraints (Otto and Payseur, 2019). In addition, the intra-chromosomal  
833 component of the genetic shuffling is a small contributor to the genome-wide shuffling rate,  
834 as a major part is due to independent assortment among chromosomes (Veller et al., 2019)  
835 ~~even though there may be significant selective pressure towards more recombination~~  
836 ~~between genes within chromosomes~~. Our estimates for the chromosomal genetic shuffling  
837 do not reach the theoretical optimal value of 0.5. The pattern is not absolute, and a fraction  
838 of genes remains in low recombining regions. In grass species, up to 30% of genes are  
839 found in recombination deserts and are not subject to efficient selection (e.g. Mayer et al.,  
840 2011). Finally, it is still an open question as to whether this global distribution of COs in gene  
841 regulatory sequences is advantageous for the genetic diversity and adaptive potential of a  
842 species (Pan et al., 2016).

## 843 Conclusion

844 Our comparative study only demonstrates correlations, and not mechanisms, but helps to  
845 understand the diversity and determinants of recombination landscapes in flowering plants.  
846 Our results partly confirm previous studies based on fewer species (Haenel et al., 2018;  
847 Stapley et al., 2017; Tiley and Burleigh, 2015) while bringing new insights that alter previous

848 conclusions thanks to a detailed analysis at the species and chromosome levels. Two main  
849 and distinct CO patterns emerge across a large set of flowering plant species; it seems likely  
850 that chromosome structure (length, centromere) and gene densities are the major drivers of  
851 these patterns, and the interactions between them raise questions about the evolution of  
852 complex genomic patterns at the chromosome scale (Gaut et al., 2007; Nam and Ellegren,  
853 2012). The new large and curated dataset we provide in the present work should be useful  
854 for addressing such questions and testing future evolutionary hypotheses regarding the role  
855 of recombination in genome architecture.

## 856 Materials and Methods

### 857 Data preparation

858 To build recombination maps, we combined genetic and genomic maps in angiosperms  
859 that had already been published in the literature. We conducted a literature search to collect  
860 sex-averaged genetic maps estimated on pedigree data – with markers positions in  
861 centiMorgans (cM). The keywords used were 'genetic map', 'linkage map', 'genome  
862 assembly', 'plants' and 'angiosperms', combined with 'high-density' or 'saturated' in order to  
863 target genetic maps with a large number of markers and progenies. Additionally, we carried  
864 out searches within public genomic databases to find publicly available genetic maps. Only  
865 species with a reference genome assembly at a chromosome level were included in our  
866 study (a complete list of genetic maps with the associated metadata is given in Tables S1,  
867 S2). As much as possible, genomic positions along the chromosome (Mb) were estimated by  
868 blasting marker sequences on the most recent genome assembly ([otherwise genomic  
869 positions were those of the original publication](#)). Genome assemblies with annotation files at  
870 a chromosome-scale were downloaded from NCBI (<https://www.ncbi.nlm.nih.gov/>) or public  
871 databases. Marker sequences were blasted with 'blastn' and a 90% identity cutoff. Markers  
872 were anchored to the genomic position of the best hit. When the sequence was a pair of  
873 primers, the mapped genomic position was the best hit between pairs of positions showing a

874 short distance between the forward and reverse primer (< 200 bp). In a few exceptions (see  
875 Table S1), genomic positions were mapped on a close congeneric species genome and the  
876 genomic map was kept if there was good collinearity between the genetic and genomic  
877 positions. Chromosomes were numbered as per the reference genome assembly. When  
878 marker sequences were not available, we kept the genomic positions published with the  
879 genetic map. ~~The centromere position was retrieved from the literature (i.e. the centromeric~~  
880 ~~index, the ratio of the short arm length versus the total chromosome length).~~ The total  
881 genomic length was estimated by the length of the chromosome sequence in the genome  
882 assembly. The total genetic length was corrected using Hall and Willis's method (Hall and  
883 Willis, 2005) which accounts for undetected events of recombination in distal regions by  
884 adding 2s to the length of each linkage group (where s is the average marker spacing in the  
885 group).

886 We selected genetic and genomic maps after stringent filtering and corrections, using  
887 custom scripts available in a public Github repository  
888 ([https://github.com/ThomasBrazier/diversity-determinants-recombination-landscapes-](https://github.com/ThomasBrazier/diversity-determinants-recombination-landscapes-flowering-plants.git)  
889 [flowering-plants.git](https://github.com/ThomasBrazier/diversity-determinants-recombination-landscapes-flowering-plants.git)). We assumed that markers must follow a monotone increasing function  
890 when plotting genetic distances as a function of genomic distances in a chromosome (i.e.  
891 the Marey map) ~~and to guarantee~~ collinearity between the genetic map and the reference  
892 genome was required to keep a Marey map. If necessary, genetic maps were reoriented so  
893 that the Marey map function is increasing (i.e. genetic distances read in the opposite  
894 direction). In a first step, Marey maps with fewer than 50 markers per chromosome were  
895 removed, although a few exceptions were visually validated (maps with ~30 markers). Marey  
896 maps with more than 10% of the total genomic map length missing at one end of the  
897 chromosome were removed. Marey maps with obvious artefacts and assembly mismatches  
898 (e.g. lack of collinearity, large inversions, large gaps) were removed. Markers clearly outside  
899 the global trend of the Marey map (e.g. large genetic/genomic distance from the global cloud  
900 of markers or from the interpolated Marey function, no other marker in a close



901 [neighbourhood](#)) were visually filtered out, [and multiple iterations of filtering/interpolation](#)  
902 [helped to refine outlier removal](#). The Marey map approach is a graphical method, so figures  
903 were systematically produced at each step as a way to evaluate the results of the filtering  
904 and corrections. Finally, when multiple datasets were available for the same species, we  
905 selected the dataset with the highest marker density – in addition to visual validation – to  
906 maintain a balanced sampling and avoid pseudo-replicates of the same chromosome.

### 907 Estimates of local recombination rates

908 Local recombination rates along the chromosome were estimated [with custom scripts](#)  
909 [following the Marey map approach, as described in the MareyMap R package \(Rezvoy et al.,](#)  
910 [2007\)](#) ~~with the Marey map approach described in the MareyMap R package (Rezvoy et al.,~~  
911 [2007\). The mathematical function of the Marey map was interpolated with a two-degree  
912 polynomial loess regression. Each span smoothing parameter was calibrated by 1,000  
913 iterations of hold-out partitioning \(random sampling of markers between two subsets; 2/3 for  
914 training and 1/3 for testing\) with the Mean Squared Error of the loess regression as a  
915 goodness-of-fit criterion. The possible span ranged from 0.2 to 0.5 and was visually adjusted  
916 for certain maps. The local recombination rate was the derivative of the interpolated  
917 smoothed function in fixed 100 kb and 1 Mb non-overlapping windows. Negative estimates  
918 were not possible as we assumed a monotonously increasing function and negative  
919 recombination rates were set to zero. The 95% confidence intervals of the recombination  
920 rates were estimated by 1,000 bootstrap replicates of the markers \[and recombination\]\(#\)  
921 \[landscapes with large confidence interval were discarded\]\(#\). The quality of the estimates was  
922 checked using the correlation between the 100 kb and 1 Mb windows.](#)

### 923 The [distribution of CO along chromosomes](#)~~broken stick model~~

924 The spatial structure of recombination landscapes across species and chromosomes is a  
925 major feature of recombination landscapes. ~~Applied to the distribution of recombination in~~  
926 ~~Marey maps, our implementation of the broken stick model seemed effective to visualize the~~

927 ~~broad-scale variation of recombination rates (White and Hill, 2020)~~. We divided the Marey  
928 map in  $k$  segments of equal ~~genetic-genomic~~ size (Mb) and then calculated the relative  
929 ~~genomic-genetic~~ size (cM) of each segment. Under the null model (i.e. random  
930 recombination), one expects  $k$  segments of equal ~~genomic-genetic~~ size  $1/k$ . The relative  
931 recombination rate ~~in the segment  $j$~~  was estimated by the log-ratio of the ~~relative-observed~~  
932 genetic size (i.e. genetic size of segment  $j$ ) divided by the ~~relative-expected genomic-genetic~~  
933 size (i.e. fixed to total genetic size /  $k$  by the model), as in the following equation.

$$\text{relative recombination rate} = \log_{10} \frac{\text{genetic}_i}{\text{genetic}_{\text{total}}/k}$$

935 -Given the observation that most recombination landscapes are broken down into at least  
936 three segments (White and Hill, 2020), we arbitrarily chose a number of segments  $k = 10$  to  
937 reach a good resolution (a larger  $k$  did not show any qualitative differences).

### 938 Crossover patterns and the periphery-bias ratio

939 We investigated the spatial bias towards distal regions of the chromosome in the  
940 distribution of recombination by estimating recombination rates as a function of relative  
941 distances to the telomere (i.e. distance to the nearest chromosome end). Chromosomes  
942 were split by their midpoint and only one side was randomly sampled for each chromosome  
943 to avoid pseudo-replicates and the averaging of two potentially contrasting patterns on  
944 opposite arms. The relative distance to the telomere was the distance to the telomere  
945 divided by total chromosome size, then divided into 20 bins of equal relative distances. A  
946 periphery-bias ratio metric similar to the one presented in Haenel et al. (2018) was estimated  
947 to measure the strength of the distal bias. We divided the recombination rates in the tip of  
948 the chromosome (10% on each side of the chromosome, and one randomly sampled tip) by  
949 the mean recombination rate of the whole chromosome. We investigated the sensitivity of  
950 this periphery-bias ratio to the sampling scale by calculating the ratio for many distal region  
951 sizes (FigureFig S124).

Formatted: Font: Italic

## 952 Testing centromere or telomere effects

953 We searched the literature for centromeric indices (ratio of the short arm length divided by  
954 the total chromosome length) established by cytological measures. When we had no  
955 information about the correct orientation of the chromosome (short arm/long arm), the  
956 centromeric index was oriented to match the region with the lowest recombination rate of the  
957 whole chromosome (i.e. putative centromere). To determine if telomeres and centromeres  
958 play a significant role in CO patterning, we fitted empirical CO distributions to three  
959 theoretical models of CO distribution. In the following equations,  $d(x)$  is the relative genetic  
960 distance at the relative genomic position  $x$ , and  $a$  is a coefficient corresponding to the excess  
961 of COs per genomic distance. Under the strict 'telomere' model (1), we assumed that only  
962 telomeres played a role in CO distribution, i.e. an equal distribution of COs on both sides of  
963 the chromosome (i.e.  $d(1/2) = d(1) - d(1/2)$ ), such that  $\frac{d(1/2)}{d(1)} = 0.5$ . The 'telomere +  
964 centromere + one mandatory CO per arm' model (2) assumed at least one CO per  
965 chromosome arm and a relative genetic distance of each chromosome arm proportional to  
966 its relative genomic size, corresponding to the role of centromere position, denoted  $d(c)$ . We  
967 have  $d(c) = 50 + a \times c$  and  $d(1) - d(c) = 50 + a \times (1 - c)$ , such that  $\frac{d(c)-50}{d(1)-100} = c$ . Lastly,  
968 the 'telomere + centromere + one CO per chromosome' model (3) assumed at least one CO  
969 per chromosome and a relative genetic distance within the chromosome proportional to its  
970 relative genomic distance. We have  $d(c) = c \times 50 + a \times c$  and  $d(1) - d(c) = (1 - c) \times 50 +$   
971  $a \times (1 - c)$ , such that  $\frac{d(c)}{d(1)} = c$ . The three competing models were compared with a linear  
972 regression between empirical and theoretical values, based on the adjusted  $R^2$  and AIC-BIC  
973 criteria among chromosomes. The number of species supporting each model was calculated  
974 based on the adjusted  $R^2$  within species, for all species with at least five chromosomes.

## 975 Gene density

976 We retrieved genome annotations ('gff' files) for genes, coding sequences and exon  
977 positions, preferentially from NCBI and otherwise from public databases (41 species). We

978 estimated gene counts in 100 kb windows for recombination maps by counting the number  
979 of genes with a starting position falling inside the window. For each gene count, we  
980 estimated the species mean recombination rate and its confidence interval at 95% by 1,000  
981 bootstrap replicates (chromosomes pooled per species). Most species had rarely more than  
982 20 genes over a 100 kb span and variance dramatically increased in the upper range of the  
983 gene counts, and therefore we pruned gene counts over 20 for graphical representation and  
984 statistical analyses.

## 985 Genetic shuffling

986 To assess the efficiency of the recombination between chromosomes and species, we  
987 calculated the measure of intra-chromosomal genetic shuffling described by Veller et al.  
988 (2019). To have even sampling along the chromosome, genetic positions (cM) of 1,000  
989 pseudo-markers evenly distributed along genomic distances (Mb) were interpolated using a  
990 loess regression on each Marey map, following the same smoothing and interpolation  
991 procedure as for the estimation of the recombination rates. The chromosomal genetic  
992 shuffling  $\bar{r}_{intra}$  were calculated as per the intra-chromosomal component of the equation 10  
993 presented in Veller et al. (2019). For a single chromosome,

$$994 \quad \bar{r}_{intra} = \sum_{i < j} (r_{ij} / \binom{\Lambda}{2})$$

995 where  $\Lambda$  is the total number of loci,  $\binom{\Lambda}{2} = \Lambda(\Lambda - 1)/2$  and  $r_{ij}$  is the rate of shuffling for  
996 the locus pair  $(i, j)$ . For the intra-chromosomal component  $\bar{r}_{intra}$ , the pairwise shuffling rate  
997 was only calculated for linked sites, i.e. loci on the same chromosome. This pairwise  
998 shuffling rate was estimated by the recombination fraction between loci  $i$  and  $j$ .  
999 Recombination fractions were directly calculated from Haldane or Kosambi genetic distances  
1000 between loci by applying a reverse Haldane function (1) or reverse Kosambi function (2),  
1001 depending on the mapping function originally used for the given genetic map.

1002 
$$r_{ij} = \frac{1}{2}(1 - e^{-2d_{ij}/100}) \quad (1)$$

1003 
$$r_{ij} = \tanh\frac{1}{2}\tanh(2d_{ij}/100) \quad (2)$$

1004 We also estimated marker positions in gene distances instead of genomic distances (Mb)  
1005 to investigate the influence of the non-random distribution of genes on the recombination  
1006 landscape. Gene distances were the cumulative number of genes along the chromosome at  
1007 a given marker's position. Splicing variants and overlapping genes were counted as a single  
1008 gene. The genetic shuffling was re-estimated with gene distances instead of genomic  
1009 distances to consider a genetic shuffling based on the gene distribution, as suggested by  
1010 Veller et al. (2019). To compare the departure from a random distribution along the  
1011 chromosome among both types of distances (i.e. genomic and genes), we calculated the  
1012 Root Mean Square Error (RMSE) of each Marey map and for both distances. To assess if  
1013 the distribution of genes influenced the heterogeneity of recombination landscapes, the type  
1014 of distance with the lower RMSE was considered as the more homogeneous landscape.  
1015 However, this measure for gene distances is sensitive to annotation errors and artefacts.  
1016 False negatives are therefore expected (when Marey maps were assessed as more  
1017 homogeneous in genomic distances while the inverse is true) and this classification remains  
1018 conservative.

## 1019 **Statistical analyses**

1020 All statistical analyses were performed with R version 4.0.4 (R Core Team, 2019). We  
1021 assessed statistical relationships with the non-parametric Spearman's rank correlation and  
1022 regression models. Linear Models were used for regressions with species data since we did  
1023 not detect a phylogenetic effect. The structure in the chromosome dataset was accounted for  
1024 by Linear Mixed Models (LMER) implemented in the 'lme4' R package (Bates et al., 2015, p.  
1025 4) and the phylogenetic structure was tested by fitting the Phylogenetic Generalized Linear  
1026 Mixed Model (PGLMM) of the 'phyr' R package (Ives et al., 2019). The phylogenetic time-  
1027 calibrated supertree used for the covariance matrix was retrieved from the publicly available

1028 phylogeny constructed by Smith and Brown (Smith and Brown, 2018). Marginal and  
1029 conditional  $R^2$  values for LMER were estimated with the 'MuMIn' R package (Bartoń, 2020).  
1030 Significance of the model parameters was tested with the 'lmerTest' R package (Kuznetsova  
1031 et al., 2017). We selected the model based on AIC/BIC criteria and diagnostic plots.  
1032 Reliability and stability of the various models were assessed by checking quantile-quantile  
1033 plots for the normality of residuals and residuals plotted as a function of fitted values for  
1034 homoscedasticity. Model quality was checked by the comparison of predicted and observed  
1035 values. Given the skewed nature of some distributions, we used logarithm (base 10)  
1036 transformations when appropriate. For comparison between species, statistics were  
1037 standardized (i.e. by subtracting the mean and dividing by standard deviation). Mean  
1038 statistics and 95% confidence intervals were estimated by 1,000 bootstrap replicates.

## 1039 Acknowledgements

1040 [We thank Eric Janczewski, Laurent Duret, Anne-Marie Chèvre, Eric Petit and Armel](#)  
1041 [Salmon, as well as three anonymous reviewers, for precious comments on the results and](#)  
1042 [manuscript. We thank all the people that provided us genetic data that were not published](#)  
1043 [yet.](#)

Formatted: Normal

## 1044 Author contributions

1045 [SG conceptualised and supervised the study. TB produced and analysed data. Both authors](#)  
1046 [contributed to writing the paper.](#)

Formatted: Indent: First line: 0"

## 1047 References

1048 Apuli, R.-P., Bernhardsson, C., Schiffthaler, B., Robinson, K.M., Jansson, S., Street, N.R.,  
1049 Ingvarsson, P.K., 2020. Inferring the Genomic Landscape of Recombination Rate Variation

1050 in European Aspen (*Populus tremula*). *G3 GenesGenomesGenetics* 10, 299–309.  
1051 <https://doi.org/10.1534/g3.119.400504>

1052 Bartoń, K., 2020. MuMIn: Multi-model inference (manual).

1053 Barton, N.H., 1995. A general model for the evolution of recombination. *Genet. Res.* 65,  
1054 123–144. <https://doi.org/10.1017/S0016672300033140>

1055 Bates, D., Mächler, M., Bolker, B., Walker, S., 2015. Fitting linear mixed-effects models  
1056 using lme4. *J. Stat. Softw.* 67, 1–48. <https://doi.org/10.18637/jss.v067.i01>

1057 Bishop, D.K., Zickler, D., 2004. Early decision; meiotic crossover interference prior to  
1058 stable strand exchange and synapsis. *Cell* 117, 9–15. [https://doi.org/10.1016/S0092-8674\(04\)00297-1](https://doi.org/10.1016/S0092-8674(04)00297-1)  
1059

1060 Blitzblau, H.G., Bell, G.W., Rodriguez, J., Bell, S.P., Hochwagen, A., 2007. Mapping of  
1061 Meiotic Single-Stranded DNA Reveals Double-Strand-Break Hotspots near Centromeres  
1062 and Telomeres. *Curr. Biol.* 17, 2003–2012. <https://doi.org/10.1016/j.cub.2007.10.066>

1063 Booker, T.R., Yeaman, S., Whitlock, M.C., 2020. Variation in recombination rate affects  
1064 detection of outliers in genome scans under neutrality. *Mol. Ecol. mec.*15501.  
1065 <https://doi.org/10.1111/mec.15501>

1066 Capilla-Pérez, L., Durand, S., Hurel, A., Lian, Q., Chambon, A., Taochy, C., Solier, V.,  
1067 Grelon, M., Mercier, R., 2021. The synaptonemal complex imposes crossover interference  
1068 and heterochiasmy in *Arabidopsis*. *Proc. Natl. Acad. Sci.* 118, e2023613118.  
1069 <https://doi.org/10.1073/pnas.2023613118>

1070 [Charlesworth, B., Sniegowski, P. & Stephan, W., 1994, The evolutionary dynamics of](#)  
1071 [repetitive DNA in eukaryotes. \*Nature\*, 371, 215–220.](#)

Formatted: Swedish (Sweden)

Formatted: Font: (Default) Arial, 11 pt, English (United Kingdom)

Formatted: Font: (Default) Arial, 11 pt, English (United Kingdom)

Formatted: Indent: First line: 0.2"

Formatted: Font: (Default) Arial, 11 pt, Not Italic, English (United Kingdom)

Formatted: Font: (Default) Arial, 11 pt, English (United Kingdom)

Formatted: Font: (Default) Arial, 11 pt, Not Bold, English (United Kingdom)

Formatted: Font: (Default) Arial, 11 pt, English (United Kingdom)

1072 Charlesworth, B., Jensen, J.D., 2021. Effects of Selection at Linked Sites on Patterns of  
1073 Genetic Variability. *Annu. Rev. Ecol. Evol. Syst.* 52, 177–197.  
1074 <https://doi.org/10.1146/annurev-ecolsys-010621-044528>

1075 Choi, K., Zhao, X., Kelly, K.A., Venn, O., Higgins, J.D., Yelina, N.E., Hardcastle, T.J.,  
1076 Ziolkowski, P.A., Copenhaver, G.P., Franklin, F.C.H., McVean, G., Henderson, I.R., 2013.  
1077 *Arabidopsis* meiotic crossover hot spots overlap with H2A.Z nucleosomes at gene  
1078 promoters. *Nat. Genet.* 45, 1327–1336. <https://doi.org/10.1038/ng.2766>

1079 Choi, K., Zhao, X., Tock, A.J., Lambing, C., Underwood, C.J., Hardcastle, T.J., Serra, H.,  
1080 Kim, Juhyun, Cho, H.S., Kim, Jaeil, Ziolkowski, P.A., Yelina, N.E., Hwang, I., Martienssen,  
1081 R.A., Henderson, I.R., 2018. Nucleosomes and DNA methylation shape meiotic DSB  
1082 frequency in *Arabidopsis thaliana* transposons and gene regulatory regions. *Genome Res.*  
1083 28, 532–546. <https://doi.org/10.1101/gr.225599.117>

1084 Comeron, J.M., 2017. Background selection as null hypothesis in population genomics:  
1085 insights and challenges from *Drosophila* studies. *Philos. Trans. R. Soc. B Biol. Sci.* 372,  
1086 20160471. <https://doi.org/10.1098/rstb.2016.0471>

1087 Cooper, T.J., Garcia, V., Neale, M.J., 2016. Meiotic DSB patterning: A multifaceted  
1088 process. *Cell Cycle* 15, 13–21. <https://doi.org/10.1080/15384101.2015.1093709>

1089 Corbett-Detig, R.B., Hartl, D.L., Sackton, T.B., 2015. Natural Selection Constrains Neutral  
1090 Diversity across A Wide Range of Species. *PLOS Biol.* 13, e1002112.  
1091 <https://doi.org/10.1371/journal.pbio.1002112>

1092 de Massy, B., 2013. Initiation of Meiotic Recombination: How and Where? Conservation  
1093 and Specificities Among Eukaryotes. *Annu. Rev. Genet.* 47, 563–599.  
1094 <https://doi.org/10.1146/annurev-genet-110711-155423>

1095 Dukić, M., Bomblies, K., 2022. Male and female recombination landscapes of diploid  
1096 *Arabidopsis arenosa*. *Genetics* iyab236. <https://doi.org/10.1093/genetics/iyab236>



1097 Ellermeier, C., Higuchi, E.C., Phadnis, N., Holm, L., Geelhood, J.L., Thon, G., Smith,  
1098 G.R., 2010. RNAi and heterochromatin repress centromeric meiotic recombination. Proc.  
1099 Natl. Acad. Sci. 107, 8701–8705. <https://doi.org/10.1073/pnas.0914160107>

Formatted: English (United States)

1100 Falque, M., Mercier, R., Mézard, C., de Vienne, D., Martin, O.C., 2007. Patterns of  
1101 Recombination and MLH1 Foci Density Along Mouse Chromosomes: Modeling Effects of  
1102 Interference and Obligate Chiasma. Genetics 176, 1453–1467.  
1103 <https://doi.org/10.1534/genetics.106.070235>

1104 Fernandes, J.B., Wlodzimierz, P., Henderson, I.R., 2019. Meiotic recombination within  
1105 plant centromeres. Curr. Opin. Plant Biol. 48, 26–35.  
1106 <https://doi.org/10.1016/j.pbi.2019.02.008>

1107 Ferreira, M.T.M., Glombik, M., Perníčková, K., Duchoslav, M., Scholten, O., Karafiátová,  
1108 M., Techio, V.H., Doležel, J., Lukaszewski, A.J., Kopecký, D., 2021. Direct evidence for  
1109 crossover and chromatid interference in meiosis of two plant hybrids (*Lolium*  
1110 *multiflorum* × *Festuca pratensis* and *Allium cepa* × *A. roylei*). J. Exp. Bot. 72, 254–267.  
1111 <https://doi.org/10.1093/jxb/eraa455>

Formatted: Swedish (Sweden)

1112 Foss, E., Lande, R., Stahl, F., Steinberg, C., 1993. Chiasma interference as a function of  
1113 genetic distance. Genetics 133, 681–691.

1114 Galtier, N., Roux, C., Rousselle, M., Romiguier, J., Figuet, E., Glémin, S., Bierne, N.,  
1115 Duret, L., 2018. Codon Usage Bias in Animals: Disentangling the Effects of Natural  
1116 Selection, Effective Population Size, and GC-Biased Gene Conversion. Mol. Biol. Evol. 35,  
1117 1092–1103. <https://doi.org/10.1093/molbev/msy015>

1118 Gaut, B.S., Wright, S.I., Rizzon, C., Dvorak, J., Anderson, L.K., 2007. Recombination: an  
1119 underappreciated factor in the evolution of plant genomes. Nat. Rev. Genet. 8, 77–84.  
1120 <https://doi.org/10.1038/nrg1970>

1121 Glémin, S., Clément, Y., David, J., Ressayre, A., 2014. GC content evolution in coding  
1122 regions of angiosperm genomes: a unifying hypothesis. *Trends Genet.* 30, 263–270.  
1123 <https://doi.org/10.1016/j.tig.2014.05.002>

1124 Haenel, Q., Laurentino, T.G., Roesti, M., Berner, D., 2018. Meta-analysis of chromosome-  
1125 scale crossover rate variation in eukaryotes and its significance to evolutionary genomics.  
1126 *Mol. Ecol.* 27, 2477–2497. <https://doi.org/10.1111/mec.14699>

1127 Hall, M.C., Willis, J.H., 2005. Transmission Ratio Distortion in Intraspecific Hybrids of  
1128 *Mimulus guttatus*: Implications for Genomic Divergence. *Genetics* 170, 375–386.  
1129 <https://doi.org/10.1534/genetics.104.038653>

1130 Hartmann, M., Umbanhowar, J., Sekelsky, J., 2019. Centromere-Proximal Meiotic  
1131 Crossovers in *Drosophila melanogaster* Are Suppressed by Both Highly Repetitive  
1132 Heterochromatin and Proximity to the Centromere. *Genetics* 213, 113–125.  
1133 <https://doi.org/10.1534/genetics.119.302509>

1134 He, Y., Wang, M., Dukowic-Schulze, S., Zhou, A., Tiang, C.-L., Shilo, S., Sidhu, G.K.,  
1135 Eichten, S., Bradbury, P., Springer, N.M., Buckler, E.S., Levy, A.A., Sun, Q., Pillardy, J.,  
1136 Kianian, P.M.A., Kianian, S.F., Chen, C., Pawlowski, W.P., 2017. Genomic features shaping  
1137 the landscape of meiotic double-strand-break hotspots in maize. *Proc. Natl. Acad. Sci.* 114,  
1138 12231–12236. <https://doi.org/10.1073/pnas.1713225114>

1139 Higgins, J.D., Perry, R.M., Barakate, A., Ramsay, L., Waugh, R., Halpin, C., Armstrong,  
1140 S.J., Franklin, F.C.H., 2012. Spatiotemporal Asymmetry of the Meiotic Program Underlies  
1141 the Predominantly Distal Distribution of Meiotic Crossovers in Barley. *Plant Cell* 24, 4096–  
1142 4109. <https://doi.org/10.1105/tpc.112.102483>

1143 Hinch, A.G., Zhang, G., Becker, P.W., Moralli, D., Hinch, R., Davies, B., Bowden, R.,  
1144 Donnelly, P., 2019. Factors influencing meiotic recombination revealed by whole-genome

1145 sequencing of single sperm. *Science* 363, eaau8861.  
1146 <https://doi.org/10.1126/science.aau8861>

1147 Ives, A., Dinnage, R., Nell, L.A., Helmus, M., Li, D., 2019. phyr: Model based phylogenetic  
1148 analysis (manual).

1149 Jo, J., Purushotham, P.M., Han, K., Lee, H.-R., Nah, G., Kang, B.-C., 2017. Development  
1150 of a Genetic Map for Onion (*Allium cepa* L.) Using Reference-Free Genotyping-by-  
1151 Sequencing and SNP Assays. *Front. Plant Sci.* 8, 1606.  
1152 <https://doi.org/10.3389/fpls.2017.01606>

1153 Johnston, S.E., Béréanos, C., Slate, J., Pemberton, J.M., 2016. Conserved Genetic  
1154 Architecture Underlying Individual Recombination Rate Variation in a Wild Population of  
1155 Soay Sheep (*Ovis aries*). *Genetics* 203, 583–598.  
1156 <https://doi.org/10.1534/genetics.115.185553>

1157 Kent, T.V., Uzunović, J., Wright, S.I., 2017. Coevolution between transposable elements  
1158 and recombination. *Philos. Trans. R. Soc. B Biol. Sci.* 372, 20160458.  
1159 <https://doi.org/10.1098/rstb.2016.0458>

1160 Khrustaleva, L.I., de Melo, P.E., van Heusden, A.W., Kik, C., 2005. The Integration of  
1161 Recombination and Physical Maps in a Large-Genome Monocot Using Haploid Genome  
1162 Analysis in a Trihybrid *Allium* Population. *Genetics* 169, 1673–1685.  
1163 <https://doi.org/10.1534/genetics.104.038687>

1164 Kianian, P.M.A., Wang, M., Simons, K., Ghavami, F., He, Y., Dukowic-Schulze, S.,  
1165 Sundararajan, A., Sun, Q., Pillardy, J., Mudge, J., Chen, C., Kianian, S.F., Pawlowski, W.P.,  
1166 2018. High-resolution crossover mapping reveals similarities and differences of male and  
1167 female recombination in maize. *Nat. Commun.* 9, 2370. [https://doi.org/10.1038/s41467-018-](https://doi.org/10.1038/s41467-018-04562-5)  
1168 04562-5

Formatted: Swedish (Sweden)

Formatted: Swedish (Sweden)

1169 Kleckner, N., Zickler, D., Jones, G.H., Dekker, J., Padmore, R., Henle, J., Hutchinson, J.,  
1170 2004. A mechanical basis for chromosome function. *Proc. Natl. Acad. Sci.* 101, 12592–  
1171 12597. <https://doi.org/10.1073/pnas.0402724101>

1172 Kuo, P., Da Ines, O., Lambing, C., 2021. Rewiring Meiosis for Crop Improvement. *Front.*  
1173 *Plant Sci.* 12, 708948. <https://doi.org/10.3389/fpls.2021.708948>

1174 Kuznetsova, A., Brockhoff, P.B., Christensen, R.H.B., 2017. lmerTest package: Tests in  
1175 linear mixed effects models. *J. Stat. Softw.* 82, 1–26. <https://doi.org/10.18637/jss.v082.i13>

Formatted: Swedish (Sweden)

1176 Lambing, C., Kuo, P.C., Tock, A.J., Topp, S.D., Henderson, I.R., 2020. ASY1 acts as a  
1177 dosage-dependent antagonist of telomere-led recombination and mediates crossover  
1178 interference in *Arabidopsis*. *Proc. Natl. Acad. Sci.* 117, 13647–13658.  
1179 <https://doi.org/10.1073/pnas.1921055117>

Formatted: Swedish (Sweden)

1180 Lenormand, T., Engelstädter, J., Johnston, S.E., Wijnker, E., Haag, C.R., 2016.  
1181 Evolutionary mysteries in meiosis. *Philos. Trans. R. Soc. B Biol. Sci.* 371, 20160001.  
1182 <https://doi.org/10.1098/rstb.2016.0001>

1183 Lloyd, A., Jenczewski, E., 2019. Modelling Sex-Specific Crossover Patterning in  
1184 *Arabidopsis*. *Genetics* 211, 847–859. <https://doi.org/10.1534/genetics.118.301838>

1185 Lukaszewski, A.J., 2008. Unexpected behavior of an inverted rye chromosome arm in  
1186 wheat. *Chromosoma* 117, 569–578. <https://doi.org/10.1007/s00412-008-0174-4>

1187 Lukaszewski, A.J., Kopecky, D., Linc, G., 2012. Inversions of chromosome arms 4AL and  
1188 2BS in wheat invert the patterns of chiasma distribution. *Chromosoma* 121, 201–208.  
1189 <https://doi.org/10.1007/s00412-011-0354-5>

1190 Marand, A.P., Zhao, H., Zhang, W., Zeng, Z., Fang, C., Jiang, J., 2019. Historical Meiotic  
1191 Crossover Hotspots Fueled Patterns of Evolutionary Divergence in Rice. *Plant Cell* 31, 645–  
1192 662. <https://doi.org/10.1105/tpc.18.00750>

1193 Mayer, K.F.X., Martis, M., Hedley, P.E., Šimková, H., Liu, H., Morris, J.A., Steuernagel,  
1194 B., Taudien, S., Roessner, S., Gundlach, H., Kubaláková, M., Suchánková, P., Murat, F.,  
1195 Felder, M., Nussbaumer, T., Graner, A., Salse, J., Endo, T., Sakai, H., Tanaka, T., Itoh, T.,  
1196 Sato, K., Platzer, M., Matsumoto, T., Scholz, U., Doležel, J., Waugh, R., Stein, N., 2011.  
1197 Unlocking the Barley Genome by Chromosomal and Comparative Genomics. *Plant Cell* 23,  
1198 1249–1263. <https://doi.org/10.1105/tpc.110.082537>

1199 Melamed-Bessudo, C., Shilo, S., Levy, A.A., 2016. Meiotic recombination and genome  
1200 evolution in plants. *Curr. Opin. Plant Biol.* 30, 82–87.  
1201 <https://doi.org/10.1016/j.pbi.2016.02.003>

1202 Mézard, C., Tagliaro Jahns, M., Grelon, M., 2015. Where to cross? New insights into the  
1203 location of meiotic crossovers. *Trends Genet.* 31, 393–401.  
1204 <https://doi.org/10.1016/j.tig.2015.03.008>

1205 Nachman, M.W., Payseur, B.A., 2012. Recombination rate variation and speciation:  
1206 theoretical predictions and empirical results from rabbits and mice. *Philos. Trans. R. Soc. B*  
1207 *Biol. Sci.* 367, 409–421. <https://doi.org/10.1098/rstb.2011.0249>

1208 Nam, K., Ellegren, H., 2012. Recombination Drives Vertebrate Genome Contraction.  
1209 *PLoS Genet.* 8, e1002680. <https://doi.org/10.1371/journal.pgen.1002680>

1210 Osman, K., Algotishi, U., Higgins, J.D., Henderson, I.R., Edwards, K.J., Franklin, F.C.H.,  
1211 Sanchez-Moran, E., 2021. Distal Bias of Meiotic Crossovers in Hexaploid Bread Wheat  
1212 Reflects Spatio-Temporal Asymmetry of the Meiotic Program. *Front. Plant Sci.* 12, 631323.  
1213 <https://doi.org/10.3389/fpls.2021.631323>

1214 Otto, S.P., 2009. The Evolutionary Enigma of Sex. *Am. Nat.* 174, S1–S14.  
1215 <https://doi.org/10.1086/599084>

1216 Otto, S.P., Payseur, B.A., 2019. Crossover Interference: Shedding Light on the Evolution  
1217 of Recombination. *Annu. Rev. Genet.* 53, 19–44. [https://doi.org/10.1146/annurev-genet-](https://doi.org/10.1146/annurev-genet-1218-040119-093957)  
1218 040119-093957

1219 Pan, J., Sasaki, M., Kniewel, R., Murakami, H., Blitzblau, H.G., Tischfield, S.E., Zhu, X.,  
1220 Neale, M.J., Jasin, M., Succi, N.D., Hochwagen, A., Keeney, S., 2011. A Hierarchical  
1221 Combination of Factors Shapes the Genome-wide Topography of Yeast Meiotic  
1222 Recombination Initiation. *Cell* 144, 719–731. <https://doi.org/10.1016/j.cell.2011.02.009>

1223 Pan, Q., Li, L., Yang, X., Tong, H., Xu, S., Li, Z., Li, W., Muehlbauer, G.J., Li, J., Yan, J.,  
1224 2016. Genome-wide recombination dynamics are associated with phenotypic variation in  
1225 maize. *New Phytol.* 210, 1083–1094. <https://doi.org/10.1111/nph.13810>

1226 Pazhayam, N.M., Turcotte, C.A., Sekelsky, J., 2021. Meiotic Crossover Patterning. *Front.*  
1227 *Cell Dev. Biol.* 9, 681123. <https://doi.org/10.3389/fcell.2021.681123>

1228 Pellicer, J., Hidalgo, O., Dodsworth, S., Leitch, I., 2018. Genome Size Diversity and Its  
1229 Impact on the Evolution of Land Plants. *Genes* 9, 88. <https://doi.org/10.3390/genes9020088>

1230 R Core Team, 2019. R: A Language and Environment for Statistical Computing. R  
1231 Foundation for Statistical Computing, Vienna, Austria.

1232 Rezvoy, C., Charif, D., Gueguen, L., Marais, G.A.B., 2007. MareyMap: an R-based tool  
1233 with graphical interface for estimating recombination rates. *Bioinformatics* 23, 2188–2189.  
1234 <https://doi.org/10.1093/bioinformatics/btm315>

1235 Ritz, K.R., Noor, M.A.F., Singh, N.D., 2017. Variation in Recombination Rate: Adaptive or  
1236 Not? *Trends Genet.* 33, 364–374. <https://doi.org/10.1016/j.tig.2017.03.003>

1237 Sandhu, D., Gill, K.S., 2002. Gene-Containing Regions of Wheat and the Other Grass  
1238 Genomes. *Plant Physiol.* 128, 803–811. <https://doi.org/10.1104/pp.010745>

Formatted: Swedish (Sweden)

1239 Sardell, J.M., Kirkpatrick, M., 2019. Sex differences in the recombination landscape. *Am.*  
1240 *Nat.* 704943. <https://doi.org/10.1086/704943>

1241 Shahin, A., Arens, P., Van Heusden, A.W., Van Der Linden, G., Van Kaauwen, M., Khan,  
1242 N., Schouten, H.J., Van De Weg, W.E., Visser, R.G.F., Van Tuyl, J.M., 2011. Genetic  
1243 mapping in *Lilium*: mapping of major genes and quantitative trait loci for several ornamental  
1244 traits and disease resistances. *Plant Breed.* 130, 372–382. [https://doi.org/10.1111/j.1439-](https://doi.org/10.1111/j.1439-0523.2010.01812.x)  
1245 [0523.2010.01812.x](https://doi.org/10.1111/j.1439-0523.2010.01812.x)

1246 Shi, T., Rahmani, R.S., Gugger, P.F., Wang, M., Li, H., Zhang, Y., Li, Z., Wang, Q., Van  
1247 de Peer, Y., Marchal, K., Chen, J., 2020. Distinct Expression and Methylation Patterns for  
1248 Genes with Different Fates following a Single Whole-Genome Duplication in Flowering  
1249 Plants. *Mol. Biol. Evol.* 37, 2394–2413. <https://doi.org/10.1093/molbev/msaa105>

1250 Smith, S.A., Brown, J.W., 2018. Constructing a broadly inclusive seed plant phylogeny.  
1251 *Am. J. Bot.* 105, 302–314. <https://doi.org/10.1002/ajb2.1019>

1252 Soltis, P.S., Marchant, D.B., Van de Peer, Y., Soltis, D.E., 2015. Polyploidy and genome  
1253 evolution in plants. *Curr. Opin. Genet. Dev.* 35, 119–125.  
1254 <https://doi.org/10.1016/j.gde.2015.11.003>

1255 Stapley, J., Feulner, P.G.D., Johnston, S.E., Santure, A.W., Smadja, C.M., 2017.  
1256 Variation in recombination frequency and distribution across eukaryotes: patterns and  
1257 processes. *Philos. Trans. R. Soc. B Biol. Sci.* 372, 20160455.  
1258 <https://doi.org/10.1098/rstb.2016.0455>

1259 Tiley, G.P., Burleigh, J.G., 2015. The relationship of recombination rate, genome  
1260 structure, and patterns of molecular evolution across angiosperms. *BMC Evol. Biol.* 15, 194.  
1261 <https://doi.org/10.1186/s12862-015-0473-3>

Formatted: Swedish (Sweden)

1262 Underwood, C.J., Choi, K., 2019. Heterogeneous transposable elements as silencers,  
1263 enhancers and targets of meiotic recombination. *Chromosoma* 128, 279–296.  
1264 <https://doi.org/10.1007/s00412-019-00718-4>

1265 Veller, C., Kleckner, N., Nowak, M.A., 2019. A rigorous measure of genome-wide genetic  
1266 shuffling that takes into account crossover positions and Mendel's second law. *Proc. Natl.*  
1267 *Acad. Sci.* 116, 1659–1668. <https://doi.org/10.1073/pnas.1817482116>

1268 Wang, S., Zickler, D., Kleckner, N., Zhang, L., 2015. Meiotic crossover patterns:  
1269 Obligatory crossover, interference and homeostasis in a single process. *Cell Cycle* 14, 305–  
1270 314. <https://doi.org/10.4161/15384101.2014.991185>

1271 Wang, Y., Copenhaver, G.P., 2018. Meiotic Recombination: Mixing It Up in Plants. *Annu.*  
1272 *Rev. Plant Biol.* 69, 577–609. <https://doi.org/10.1146/annurev-arplant-042817-040431>

1273 Wei, C., Yang, H., Wang, S., Zhao, J., Liu, C., Gao, L., Xia, E., Lu, Y., Tai, Y., She, G.,  
1274 Sun, J., Cao, H., Tong, W., Gao, Q., Li, Y., Deng, W., Jiang, X., Wang, W., Chen, Q., Zhang,  
1275 S., Li, H., Wu, J., Wang, P., Li, P., Shi, C., Zheng, F., Jian, J., Huang, B., Shan, D., Shi, M.,  
1276 Fang, C., Yue, Y., Li, F., Li, D., Wei, S., Han, B., Jiang, C., Yin, Y., Xia, T., Zhang, Z.,  
1277 Bennetzen, J.L., Zhao, S., Wan, X., 2018. Draft genome sequence of *Camellia sinensis* var.  
1278 *sinensis* provides insights into the evolution of the tea genome and tea quality. *Proc. Natl.*  
1279 *Acad. Sci.* 115, E4151–E4158. <https://doi.org/10.1073/pnas.1719622115>

1280 White, I.M.S., Hill, W.G., 2020. Effect of heterogeneity in recombination rate on variation  
1281 in realised relationship. *Heredity* 124, 28–36. <https://doi.org/10.1038/s41437-019-0241-z>

1282 Yelina, N.E., Choi, K., Chelysheva, L., Macaulay, M., de Snoo, B., Wijnker, E., Miller, N.,  
1283 Drouaud, J., Grelon, M., Copenhaver, G.P., Mezard, C., Kelly, K.A., Henderson, I.R., 2012.  
1284 Epigenetic Remodeling of Meiotic Crossover Frequency in *Arabidopsis thaliana* DNA  
1285 Methyltransferase Mutants. *PLoS Genet.* 8, e1002844.  
1286 <https://doi.org/10.1371/journal.pgen.1002844>

Formatted: Swedish (Sweden)



1287 Zelkowski, M., Olson, M.A., Wang, M., Pawlowski, W., 2019. Diversity and Determinants  
1288 of Meiotic Recombination Landscapes. *Trends Genet.* 35, 359–370.

1289 <https://doi.org/10.1016/j.tig.2019.02.002>

1290 Zhang, L., Liang, Z., Hutchinson, J., Kleckner, N., 2014. Crossover Patterning by the  
1291 Beam-Film Model: Analysis and Implications. *PLoS Genet.* 10, e1004042.

1292 <https://doi.org/10.1371/journal.pgen.1004042>

1293 Zickler, D., Kleckner, N., 2015. Recombination, Pairing, and Synapsis of Homologs during  
1294 Meiosis. *Cold Spring Harb. Perspect. Biol.* 7, a016626.

1295 <https://doi.org/10.1101/cshperspect.a016626>

## 1296 Supporting information

1297 [FigS1. Markers positions in genetic distance \(cM\) as a function of genomic distance \(Mb\),](#)  
1298 [namely Mary maps, for each chromosome included in the dataset \(n = 665 chromosomes\).](#)  
1299 [The black vertical line is the centromere position estimated by cytological measures, when](#)  
1300 [available in the literature.](#)

1301 [FigS2. Recombination landscapes for each chromosome included in the dataset \(n = 665](#)  
1302 [chromosomes\). Recombination rate \(cM/Mb\) estimated in windows of 100kb along genomic](#)  
1303 [distances \(Mb\). Confidence interval at 95% \(grey ribbon\) estimated by 1,000 bootstraps of](#)  
1304 [loci. The black vertical line is the centromere position estimated by cytological measures,](#)  
1305 [when available in the literature.](#)

1306 [FigS3. Phylogenetic tree of species in our dataset \(n = 57\), annotated with mean](#)  
1307 [recombination rate \(cM/Mb\) and mean chromosome size \(Mb\). The supertree was retrieved](#)  
1308 [from the publicly available phylogeny constructed by Smith and Brown \(Smith & Brown,](#)  
1309 [2018\).](#)

Formatted: Swedish (Sweden)

Formatted: Swedish (Sweden)

Formatted: Heading 1, Left

Formatted: Justified

Formatted: Justified, Indent: First line: 0.2", Space After: 10 pt, Pattern: Clear

Formatted: Not Highlight

1310 [FigS4. Slopes of the linear regression within species \(linkage map length ~ chromosome](#)  
1311 [size\) as a function of the species mean genomic chromosome size \(Mb\).](#)

1312 [FigS5. The negative correlation \(Spearman's Rho coefficient\) between recombination](#)  
1313 [rates \(cM/Mb\) and the distance to the nearest telomere is stronger for species with a larger](#)  
1314 [chromosome size \(n = 57\). The linear regression line and its parametric 95% confidence](#)  
1315 [interval were estimated in ggplot2. The inset presents the distribution of Spearman's Rho](#)  
1316 [coefficients for chromosomes \(n = 665 chromosomes\). The mean correlation and its 95%](#)  
1317 [confidence interval \(black solid and dashed lines\) were estimated by 1,000 bootstraps. The](#)  
1318 [red vertical line is for a null correlation.](#)

1319 [FigS6. Standardized recombination rate \(cM/Mb\) as a function of the relative distance](#)  
1320 [\(Mb\) from the telomere along the chromosome \(physical distances expressed in 20 bins\).](#)  
1321 [Chromosomes were split in halves, a relative distance of 0.5 being the centre of the](#)  
1322 [chromosome, and only one side was randomly sampled to avoid averaging patterns. Then,](#)  
1323 [chromosomes were pooled per species. Each colour is a species. A loess regression was](#)  
1324 [estimated for each species. Species presented in four plots for clarity.](#)

1325 [FigS7. Standardized gene count as a function of the relative distance \(Mb\) from the](#)  
1326 [telomere along the chromosome \(physical distances expressed in 20 bins\). Chromosomes](#)  
1327 [were split in halves, a relative distance of 0.5 being the centre of the chromosome, and only](#)  
1328 [one side was randomly sampled to avoid averaging patterns. Then, chromosomes were](#)  
1329 [pooled per species. Each colour is a species. A loess regression was estimated for each](#)  
1330 [species. Species presented in four plots for clarity.](#)

1331 [FigS8. The genetic shuffling  \$\bar{r}\_{intra}\$  increases with the size of the genetic map \(cM\). Linear](#)  
1332 [mixed regression with a species random effect and its 95% confidence interval estimated by](#)  
1333 [ggplot2 \(black line and grey ribbon\). Each colour is a species. A linear regression was](#)  
1334 [estimated for each species.](#)

**Formatted:** Font: 10.5 pt, Not Bold, Font color: Gray-80%, Highlight

**Formatted:** Font: 11 pt, Bold, Font color: Red, Not Highlight

**Formatted:** Justified, Indent: First line: 0.2", Space After: 10 pt, Pattern: Clear

**Formatted:** Font: 11 pt, Not Bold, Font color: Auto

**Formatted:** Font: 10.5 pt, Bold, Font color: Gray-80%, Highlight

1335 [FigS9. The genetic shuffling  \$\bar{r}\_{intra}\$  decreases with the periphery-bias ratio. Linear mixed](#)  
1336 [regression with a species random effect and its 95% confidence interval estimated by](#)  
1337 [ggplot2 \(black line and grey ribbon\). Each colour is a species. A linear regression was](#)  
1338 [estimated for each species.](#)

1339 [FigS10. Gene count in windows of 100kb along genomic distances \(Mb\) for each](#)  
1340 [chromosome with gene annotations \(n = 480 chromosomes\). Recombination rate \(cM/Mb\)](#)  
1341 [estimated in windows of 100kb . Loess regression of gene count along the chromosome in](#)  
1342 [blue line with parametric confidence interval at 95% in grey.](#)

1343 [FigS11. Marey maps with genomic distances \(black points\) and gene distances \(gray](#)  
1344 [points\). Markers positions in genetic distance \(cM\) as a function of the relative physical](#)  
1345 [distance \(either Mb or cumulative number of genes\) for each chromosome with gene](#)  
1346 [annotations \(n = 480 chromosomes\). The black dashed line is a theoretical uniform](#)  
1347 [distribution of markers. The black vertical line is the centromere position estimated by](#)  
1348 [cytological measures, when available in the literature.](#)

1349 [FigS12. Sensitivity of the periphery-bias ratio to the size of the sampled distal region \(i.e.](#)  
1350 [number of bins sampled at the tips\). The periphery-bias ratio was estimated for different](#)  
1351 [numbers of bins sampled and always divided by the mean chromosomal recombination rate.](#)  
1352 [Linear regression \(black line\) shows a decrease of the periphery-bias ratio as the number of](#)  
1353 [bins increases, towards a ratio value of 1 \(dashed line\).](#)

Formatted: Justified

1354 [Table S1. Metadata for 665 recombination landscapes, with name of the dataset collected](#)  
1355 [and literal name of the chromosome used in our study, chromosome name in annotation](#)  
1356 [\(gff\), size of the genetic map \(cM, raw and corrected by methods of Chakravarti et al. \(1991\)](#)  
1357 [or Hal & Willis \(2005\)\), size of the genomic sequence in genome assembly \(Mb\), number of](#)  
1358 [markers, density of markers in cM and bp, mean interval between markers in cM and bp,](#)  
1359 [span parameter of the loess function, type of mapping function \(Haldane, Kosambi or none\),](#)  
1360 [accession of the reference genome used for markers genomic positions, link to data](#)  
1361 [repository and doi reference of the study in which the genetic map was published.](#)

1362 [Table S2. Flowering plant species included in the study, with authors, year and doi](#)  
1363 [reference of the genetic map publication, and accession of the reference genome.](#)

1364 [Table S3. Centromeric indexes estimated in cytological studies, with unit of](#)  
1365 [measurement, mean and standard error of long and short chromosome arms, centromeric](#)  
1366 [index \(ratio of short arm length divided by total chromosome length\), and doi reference to the](#)  
1367 [original study.](#)

1368 [Table S4. Correlation between recombination landscapes estimated at two different](#)  
1369 [genomic scales \(1Mb and 100kb\). Spearman's Rho coefficient was estimated for each](#)  
1370 [chromosome between recombination rates estimated directly in windows of 1Mb and the](#)  
1371 [mean recombination rate of 100kb windows pooled together in 1Mb windows. Mean of the](#)  
1372 [Spearman's Rho coefficient among chromosomes and proportion of significant p-values](#)  
1373 [given for each species.](#)

1374 [Table S5. Selection of the regression model between LM, LMER and PGLMM which](#)  
1375 [explains best the relationship between the mean recombination rate \(cM/Mb\) and the](#)  
1376 [chromosome size \(Mb\), based on AIC and BIC criteria.](#)

1377 [Table S6. Species averaged correlation between the averaged chromosome size \(Mb\)](#)  
1378 [and the averaged periphery-bias ratio. Mean of the Spearman's Rho coefficient among](#)

Formatted: Font: (Default) Arial, 11 pt, Not Bold, Font color: Auto, Not Highlight

1379 [correlations at chromosome scale and proportion of significant p-values given for each](#)  
1380 [species.](#)

1381 [Table S7. Chromosome correlation between the recombination rate \(cM/Mb\) and the](#)  
1382 [relative distance to the telomere, with Spearman's Rho coefficient and p-value of the test per](#)  
1383 [chromosome.](#)

1384 [Table S8. Species averaged correlation between the recombination rate \(cM/Mb\) and the](#)  
1385 [relative distance to the telomere. Mean of the Spearman's Rho coefficient among](#)  
1386 [correlations at chromosome scale and proportion of significant p-values given for each](#)  
1387 [species.](#)

1388 [Table S9. Selection of the best model of crossover distribution for each species, based on](#)  
1389 [Adjusted R-Squared between observed values and theoretical values predicted by the](#)  
1390 [model. The best model selected for each species is the one maximizing the Adjusted R-](#)  
1391 [Squared.](#)

1392 [Table S10. Selection of the best model of crossover distribution for each species in a](#)  
1393 [subset of chromosomes with at least 50cM on each chromosome arm, based on Adjusted R-](#)  
1394 [Squared between observed values and theoretical values predicted by model. The best](#)  
1395 [model selected for each species is the one maximizing the Adjusted R-Squared.](#)

1396 [Table S11. Convergence between crossover patterns and gene patterns at a species](#)  
1397 [scale. For each species is given the type of crossover pattern, the type of gene count](#)  
1398 [pattern, the difference RMSE\(gene pattern\) - RMSE\(crossover pattern\) which indicates how](#)  
1399 [gene patterns are more/less homogeneous than crossover patterns, the homogenization](#)  
1400 [effect of gene patterns \(more/less\), the difference genetic shuffling\(gene pattern\) - genetic](#)  
1401 [shuffling\(crossover pattern\) and the averaged chromosome size \(Mb\).](#)

1402 [Data S1. References for linkage map data included in this study.](#)

Formatted: Font: Not Bold

Formatted: Font: Not Bold
